# Supplementary material for: Methylation Profiles Reveal Distinct Subgroup of Hepatocellular Carcinoma Patients with Poor Prognosis
Source: PubMed Central journal article supplement (PMC4122406; doi:10.1371/journal.pone.0104158), 2014-08-05
Supplement: pone.0104158.s006.pdf [file pone.0104158.s006.pdf]

Table S1. Primers used in pyrosequencing.

| <b>Gene Symbol</b> | <b>Forward Primer</b>          | <b>Reverse Primer</b>              | <b>Sequencing Primer</b>  | <b>Annealing Temperature (°C)</b> |
|--------------------|--------------------------------|------------------------------------|---------------------------|-----------------------------------|
| CYB5R2             | GATTAGGTTTAGGGTAGG             | Biotin-CCTAACCCCTTCCCTACACA        | TGAGGTATGTAGAATGAATATA    | 57                                |
| CYP11B1            | GGGTAAAGGTAGAGGTGTGTATG        | Biotin-ACAACAACCTCAACCACCTATT      | TGTAAAGGGTATAGGTATTG      | 55                                |
| GSTP1              | TTGTTTTGTGAAGYGGGTGTG          | Biotin-TTCCCTCTTCCCAAATCC          | GGTTTTAGGGAATTTTT         | 55                                |
| PKDREJ             | AGGAGGAAGGTTTAGGTTAGG          | Biotin-ACCTCTACTTCCCCATA           | GTAAGTAGAGGTAGTATTAG      | 55                                |
| SH3YL1             | TTGGGTTTGGGAGTTTTTTGAGAT       | Biotin-AAATAAATCCCCAATACTCACTACTAC | TTTGAGGGAGAAGGTTTGA       | 55                                |
| SPDY1              | Biotin-GGGTTGGAGGGAGATTTTAGAG  | AAACTAAAACCCTACCTTCTCATCT          | ACTAAAACCCTACCTTCTCATCTAA | 55                                |
| SPINT2             | TGAGGGTAGTTGAGTGT              | Biotin-ATACCTAAATCTACTCCTCACTC     | TAAGGGAAGGGTGGTAGG        | 55                                |
| SPRR3              | ATGGTTGAAGTGGATATGGAAATAATAA   | Biotin-AATTCACTTATTCTACACCATCC     | AATAATAATAGGTATTTTTGGTT   | 59                                |
| TSPYL5             | Biotin-GAGGTTATAGTTTAGGGGGAGT  | ACCCTTCACAATACCAAATCTC             | CAAATAACCCCAAATAAAATAACC  | 55                                |
| TUBB6              | GGAATAGGGTTTAGTTAAAGTGATTATAGG | Biotin-ACAATCATTCCTTTCCACCACA      | GGGTTGGATTAGAAAATGAATATT  | 59                                |
| ZNF154             | AGGTGTGTTTATAGGATTAGAGATAGTAG  | Biotin-AAACAACCATCCCTATCCCAAACCT   | AGTAGAGAGTAGAGTTGGGGTTA   | 57                                |
