# Supplementary material for: Methylation Profiles Reveal Distinct Subgroup of Hepatocellular Carcinoma Patients with Poor Prognosis
Source: PubMed Central journal article supplement (PMC4122406; doi:10.1371/journal.pone.0104158), 2014-08-05
Supplement: pone.0104158.s007.pdf [file pone.0104158.s007.pdf]

Table S2. Primers used for quantitative real time PCR.

| <b>Primer Name</b> | <b>Primer Sequence</b> | <b>Annealing Temperature (°C)</b> |
|--------------------|------------------------|-----------------------------------|
| B_ACTIN_RT_F       | AAAGACCTGTACGCCAACAC   | 59                                |
| B_ACTIN_RT_R       | GTCATACTCCTGCTTGCTGAT  |                                   |
| CYB5R2_RT_F        | GAACATGAAAATCGGGGAGA   | 59                                |
| CYB5R2_RT_R        | TGTCTGGTTGGCAAAGATGA   |                                   |
| GSTP1_RT_F         | ATCAGGGCCAGAGCTGGA     | 59                                |
| GSTP1_RT_R         | ATAGGCAGGAGGCTTTGAGTGA |                                   |
| SH3YL1_RT_F        | GCAGGCGTGTCTTTAGAAGG   | 59                                |
| SH3YL1_RT_R        | CTCCCTTGCTGCTTTTCTTG   |                                   |
| SPINT2_RT_F        | AACAGCAATAATTACCTGACC  | 59                                |
| SPINT2_RT_R        | AAGGATGCACGGCAAGGC     |                                   |
