# Supplementary material for: Methylation Profiles Reveal Distinct Subgroup of Hepatocellular Carcinoma Patients with Poor Prognosis
Source: PubMed Central journal article supplement (PMC4122406; doi:10.1371/journal.pone.0104158), 2014-08-05
Supplement: pone.0104158.s008.pdf [file pone.0104158.s008.pdf]

Table S3. 170 differentially methylated CpG loci that were selected in Consensus Hierarchical Clustering with feature selection. 20 out of 170 genes have differential expression between tumor and adjacent non-tumorous samples.

| No. | Probeset ID | SYMBOL       | Mean Difference ( $\Delta\beta$ ) | FDR adjusted P-value | Expression Fold Change (T/NT) | FDR adjusted P-value |
|-----|-------------|--------------|-----------------------------------|----------------------|-------------------------------|----------------------|
| 1   | cg21376883  | ACTN2        | 0.10                              | 1.28E-03             | 1.26                          | 2.31E-03             |
| 2   | cg27050763  | AHCTF1       | -0.21                             | 4.27E-08             | 1.20                          | 2.20E-04             |
| 3   | cg18809289  | ALOX5        | 0.20                              | 4.23E-09             | -1.38                         | 3.08E-08             |
| 4   | cg08690031  | CDCA7        | 0.18                              | 4.30E-06             | 1.46                          | 3.49E-06             |
| 5   | cg05755779  | COLEC10      | -0.16                             | 1.06E-06             | -1.85                         | 2.41E-17             |
| 6   | cg09009111  | EMILIN2      | 0.29                              | 6.94E-11             | 1.25                          | 1.92E-02             |
| 7   | cg18661868  | FES          | 0.20                              | 3.88E-09             | -1.68                         | 2.21E-09             |
| 8   | cg17100322  | FYN          | 0.23                              | 6.52E-07             | -1.31                         | 1.45E-06             |
| 9   | cg22129364  | GPX7         | 0.22                              | 2.71E-08             | 1.40                          | 6.13E-07             |
| 10  | cg26808784  | H19          | -0.27                             | 2.49E-13             | -2.75                         | 5.24E-06             |
| 11  | cg06638433  | IGF2BP1      | 0.22                              | 1.06E-08             | 1.31                          | 4.17E-05             |
| 12  | cg07862358  | MYO10        | 0.30                              | 6.02E-12             | -1.30                         | 9.20E-11             |
| 13  | cg23681213  | PNMA1        | 0.21                              | 4.71E-08             | 1.28                          | 5.81E-05             |
| 14  | cg20276750  | PPM1M        | 0.15                              | 3.87E-04             | 1.20                          | 1.26E-03             |
| 15  | cg03262773  | RAD54L       | 0.13                              | 1.72E-03             | 1.58                          | 1.22E-13             |
| 16  | cg02589695  | RASSF5       | 0.15                              | 2.20E-04             | -1.22                         | 1.52E-05             |
| 17  | cg22511633  | TBL2         | 0.20                              | 5.80E-09             | 1.42                          | 1.52E-13             |
| 18  | cg02545192  | TERT         | 0.27                              | 4.26E-11             | 1.39                          | 1.09E-05             |
| 19  | cg20267005  | TYROBP       | -0.12                             | 3.24E-04             | -1.31                         | 8.93E-03             |
| 20  | cg24680602  | ZNF232       | 0.21                              | 7.31E-08             | 1.31                          | 3.02E-10             |
| 21  | cg20359349  | APR2         | -0.13                             | 3.64E-05             |                               |                      |
| 22  | cg07241568  | ABO          | 0.20                              | 5.82E-09             |                               |                      |
| 23  | cg09079275  | ADAM19       | 0.14                              | 5.16E-04             |                               |                      |
| 24  | cg04988423  | ALX4         | 0.19                              | 4.40E-06             |                               |                      |
| 25  | cg11260848  | ALX4         | 0.12                              | 6.80E-04             |                               |                      |
| 26  | cg07473175  | AMIGO2       | 0.32                              | 1.24E-14             |                               |                      |
| 27  | cg13640200  | AMIGO2       | 0.32                              | 4.04E-13             |                               |                      |
| 28  | cg09966445  | AMPH         | -0.28                             | 3.80E-12             |                               |                      |
| 29  | cg16192029  | ANKRD7       | -0.45                             | 4.97E-23             |                               |                      |
| 30  | cg14785449  | ASNS         | 0.24                              | 9.30E-10             |                               |                      |
| 31  | cg09911342  | ASZ1         | -0.25                             | 2.36E-13             |                               |                      |
| 32  | cg26349773  | ATP6V0A4     | -0.17                             | 1.41E-06             |                               |                      |
| 33  | cg18236477  | ATP8A2       | 0.28                              | 1.70E-10             |                               |                      |
| 34  | cg11507178  | BCL9L        | 0.15                              | 8.46E-05             |                               |                      |
| 35  | cg16778903  | BRUNOL6      | 0.46                              | 1.09E-20             |                               |                      |
| 36  | cg15516226  | BTNL9        | -0.36                             | 1.41E-18             |                               |                      |
| 37  | cg12281657  | C14orf50     | 0.40                              | 4.82E-20             |                               |                      |
| 38  | cg27394486  | C15orf2      | -0.37                             | 3.49E-16             |                               |                      |
| 39  | cg17978274  | C15orf32     | -0.34                             | 4.62E-19             |                               |                      |
| 40  | cg12796229  | C18orf43     | 0.29                              | 6.32E-11             |                               |                      |
| 41  | cg04405541  | C20orf114    | -0.18                             | 2.55E-07             |                               |                      |
| 42  | cg01671881  | C20orf71     | -0.15                             | 3.08E-07             |                               |                      |
| 43  | cg07611334  | C20orf98     | 0.30                              | 3.52E-10             |                               |                      |
| 44  | cg08713365  | C20orf98     | 0.19                              | 1.51E-07             |                               |                      |
| 45  | cg07080358  | C2orf32      | 0.20                              | 2.67E-08             |                               |                      |
| 46  | cg04532952  | CA4          | 0.21                              | 4.26E-09             |                               |                      |
| 47  | cg21003606  | CALN1        | -0.33                             | 1.96E-18             |                               |                      |
| 48  | cg24517042  | CAV3         | -0.27                             | 6.36E-15             |                               |                      |
| 49  | cg08124722  | CCL7         | -0.31                             | 8.51E-22             |                               |                      |
| 50  | cg04590978  | CCNJ         | 0.40                              | 4.29E-19             |                               |                      |
| 51  | cg15743985  | CD22         | -0.18                             | 9.91E-08             |                               |                      |
| 52  | cg21640749  | CD300LF      | -0.35                             | 4.99E-19             |                               |                      |
| 53  | cg07973967  | CD79B        | -0.11                             | 4.79E-03             |                               |                      |
| 54  | cg12038710  | CDH17        | -0.33                             | 7.31E-17             |                               |                      |
| 55  | cg08424423  | CDSN         | -0.34                             | 1.41E-18             |                               |                      |
| 56  | cg08080029  | CHD5         | 0.18                              | 9.06E-06             |                               |                      |
| 57  | cg21148892  | CLEC4F       | -0.28                             | 2.88E-15             |                               |                      |
| 58  | cg22241124  | CNGA3        | -0.23                             | 1.60E-13             |                               |                      |
| 59  | cg00290506  | CNIH3        | 0.30                              | 2.43E-11             |                               |                      |
| 60  | cg19596755  | CPT1A        | 0.18                              | 7.67E-06             |                               |                      |
| 61  | cg21604803  | CPT1C        | 0.25                              | 1.99E-12             |                               |                      |
| 62  | cg03451296  | CRIP2        | 0.17                              | 1.78E-04             |                               |                      |
| 63  | cg10938286  | CST2         | -0.37                             | 1.53E-22             |                               |                      |
| 64  | cg24875415  | CST4         | -0.32                             | 1.04E-17             |                               |                      |
| 65  | cg07824742  | DBH          | -0.19                             | 1.76E-10             |                               |                      |
| 66  | cg22605063  | DBN1         | 0.24                              | 7.69E-09             |                               |                      |
| 67  | cg15481539  | DEFA5        | -0.25                             | 5.57E-15             |                               |                      |
| 68  | cg24890043  | DKFZP566N034 | 0.22                              | 1.33E-06             |                               |                      |

|     |            |           |       |          |
|-----|------------|-----------|-------|----------|
| 69  | cg16128363 | DLGAP1    | -0.25 | 2.20E-12 |
| 70  | cg23753610 | DNAHL1    | -0.36 | 2.92E-21 |
| 71  | cg18242139 | ELAVL4    | -0.25 | 6.46E-14 |
| 72  | cg00027083 | EPB41L3   | 0.14  | 1.58E-03 |
| 73  | cg04289385 | ETV7      | 0.19  | 3.66E-06 |
| 74  | cg24176563 | EYA4      | 0.22  | 5.08E-08 |
| 75  | cg26656135 | EYA4      | 0.20  | 3.44E-07 |
| 76  | cg13338132 | FAM71C    | -0.22 | 5.94E-09 |
| 77  | cg16516400 | FAM89A    | 0.23  | 1.97E-09 |
| 78  | cg07846167 | FBLIM1    | 0.12  | 2.83E-03 |
| 79  | cg27062617 | FHOD1     | 0.19  | 2.43E-06 |
| 80  | cg15648315 | FLJ26443  | -0.14 | 6.60E-06 |
| 81  | cg03044435 | FLJ35816  | -0.31 | 2.52E-18 |
| 82  | cg22777952 | FOXB1     | 0.21  | 2.70E-08 |
| 83  | cg03663715 | FOXD1     | 0.25  | 3.98E-10 |
| 84  | cg00661485 | FOXJ1     | -0.36 | 6.53E-20 |
| 85  | cg17503456 | FOXL2     | 0.32  | 1.00E-12 |
| 86  | cg18047970 | GADL1     | -0.20 | 2.59E-09 |
| 87  | cg04534765 | GALR1     | 0.13  | 1.78E-03 |
| 88  | cg20822628 | GATA5     | -0.19 | 2.22E-10 |
| 89  | cg06954481 | GBX2      | 0.29  | 2.01E-09 |
| 90  | cg26970800 | GIF       | -0.28 | 6.25E-13 |
| 91  | cg18538812 | GIF       | -0.20 | 7.78E-10 |
| 92  | cg04037952 | GPR148    | -0.23 | 4.88E-12 |
| 93  | cg04597449 | GPR150    | 0.23  | 4.72E-12 |
| 94  | cg26252167 | GPR6      | 0.21  | 1.66E-07 |
| 95  | cg24694549 | GRIP1     | -0.27 | 2.85E-15 |
| 96  | cg14859460 | GRM6      | 0.13  | 1.88E-03 |
| 97  | cg08766149 | GZMB      | -0.38 | 6.62E-22 |
| 98  | cg17718302 | HIST1H3J  | 0.48  | 1.69E-24 |
| 99  | cg20899053 | HLXB9     | 0.26  | 4.60E-09 |
| 100 | cg24417499 | HPCA      | 0.19  | 2.99E-08 |
| 101 | cg26589285 | IL29      | -0.24 | 8.32E-13 |
| 102 | cg03963198 | IRX4      | 0.31  | 8.51E-13 |
| 103 | cg00243313 | IRX4      | 0.19  | 4.75E-07 |
| 104 | cg14614211 | IRXL1     | 0.21  | 1.61E-07 |
| 105 | cg11845202 | K5B       | -0.27 | 6.96E-13 |
| 106 | cg17255302 | K6HF      | -0.28 | 8.98E-15 |
| 107 | cg12144803 | KALRN     | -0.22 | 1.27E-11 |
| 108 | cg24924779 | KCNG1     | 0.20  | 2.22E-06 |
| 109 | cg26750319 | KCNQ1     | -0.28 | 1.54E-14 |
| 110 | cg04254916 | KRT5      | -0.29 | 2.87E-17 |
| 111 | cg18370227 | KRTHA3A   | -0.29 | 4.23E-16 |
| 112 | cg04618528 | KRTHA6    | -0.30 | 4.13E-18 |
| 113 | cg24461814 | KRTHB4    | -0.30 | 3.66E-16 |
| 114 | cg07846220 | LAMA1     | 0.23  | 9.62E-06 |
| 115 | cg02718531 | LOC114984 | 0.16  | 3.06E-05 |
| 116 | cg16456919 | LRRN5     | -0.11 | 1.80E-03 |
| 117 | cg00233307 | MAP4K1    | 0.22  | 4.64E-09 |
| 118 | cg18971054 | MGAM      | -0.26 | 4.62E-13 |
| 119 | cg23502772 | MGC42105  | 0.24  | 1.57E-09 |
| 120 | cg23771603 | MYO3A     | 0.19  | 6.71E-06 |
| 121 | cg08441170 | MYO3A     | 0.10  | 5.31E-03 |
| 122 | cg04882759 | MYOCD     | -0.27 | 1.84E-15 |
| 123 | cg07271264 | MYOD1     | 0.15  | 2.17E-04 |
| 124 | cg18059223 | NALP2     | -0.17 | 3.72E-09 |
| 125 | cg23290344 | NEF3      | 0.35  | 2.52E-13 |
| 126 | cg18267374 | NEF3      | 0.30  | 6.79E-12 |
| 127 | cg14958635 | NEUROG1   | 0.19  | 3.60E-06 |
| 128 | cg22571530 | NFASC     | 0.19  | 6.85E-07 |
| 129 | cg05973262 | NOTCH4    | -0.22 | 9.39E-11 |
| 130 | cg26845838 | OACT2     | 0.30  | 1.79E-11 |
| 131 | cg11360149 | OR2V2     | -0.28 | 1.93E-14 |
| 132 | cg11487705 | OXCT1     | 0.30  | 2.35E-11 |
| 133 | cg18902090 | PCDHAC1   | 0.19  | 9.97E-07 |
| 134 | cg05436658 | PRKCB1    | 0.33  | 3.53E-13 |
| 135 | cg19769182 | PRRT2     | 0.16  | 1.68E-06 |
| 136 | cg24989962 | PTGDR     | 0.29  | 2.03E-12 |
| 137 | cg14037665 | PXDN      | 0.18  | 4.17E-06 |
| 138 | cg12164282 | PXDN      | 0.14  | 1.73E-03 |
| 139 | cg18410627 | RALGPS1   | 0.30  | 8.08E-15 |
| 140 | cg19332710 | RIMS4     | 0.31  | 2.56E-09 |
| 141 | cg15772361 | SERPIN3   | -0.28 | 3.31E-17 |

|     |            |          |       |          |
|-----|------------|----------|-------|----------|
| 142 | cg22946150 | SH3GL3   | 0.17  | 1.17E-04 |
| 143 | cg18986165 | SIGLEC12 | -0.35 | 2.05E-19 |
| 144 | cg25437385 | SLC35F3  | 0.26  | 1.25E-08 |
| 145 | cg22445920 | SLC36A3  | -0.22 | 1.23E-11 |
| 146 | cg02919422 | SOX17    | 0.20  | 7.16E-07 |
| 147 | cg10983208 | SPOCK2   | 0.23  | 6.58E-09 |
| 148 | cg20339230 | ST8SIA2  | 0.24  | 5.02E-09 |
| 149 | cg15873301 | SYN2     | 0.23  | 1.79E-09 |
| 150 | cg12277666 | TDRD5    | 0.23  | 5.74E-09 |
| 151 | cg02915837 | TEAD4    | 0.14  | 2.75E-04 |
| 152 | cg20488657 | TFF3     | -0.22 | 1.19E-09 |
| 153 | cg01186777 | TNFSF9   | 0.26  | 1.00E-09 |
| 154 | cg19642007 | TNNT3    | -0.32 | 7.05E-19 |
| 155 | cg15120497 | TRH      | -0.19 | 1.09E-07 |
| 156 | cg07533148 | TRIM58   | 0.34  | 1.29E-11 |
| 157 | cg13628514 | TRPV4    | 0.16  | 3.10E-05 |
| 158 | cg06437862 | TUBA2    | -0.31 | 7.36E-14 |
| 159 | cg23517605 | TUBB2B   | 0.15  | 9.12E-06 |
| 160 | cg20052718 | TWIST1   | 0.22  | 1.28E-10 |
| 161 | cg26312150 | TWIST1   | 0.19  | 5.01E-09 |
| 162 | cg05241571 | UNQ467   | -0.27 | 1.70E-11 |
| 163 | cg00333226 | UNQ739   | 0.15  | 2.02E-06 |
| 164 | cg17162024 | UNQ9433  | 0.22  | 2.76E-08 |
| 165 | cg18886444 | USP4     | 0.13  | 3.80E-04 |
| 166 | cg24662718 | VAV3     | 0.31  | 2.85E-13 |
| 167 | cg18349835 | VIPR2    | 0.32  | 8.29E-12 |
| 168 | cg14667273 | VWA1     | 0.13  | 1.48E-03 |
| 169 | cg22021786 | WFDC8    | -0.27 | 1.33E-12 |
| 170 | cg22637941 | WISP1    | -0.13 | 1.40E-03 |
