# Supplementary material for: Methylation Profiles Reveal Distinct Subgroup of Hepatocellular Carcinoma Patients with Poor Prognosis
Source: PubMed Central journal article supplement (PMC4122406; doi:10.1371/journal.pone.0104158), 2014-08-05
Supplement: pone.0104158.s009.pdf [file pone.0104158.s009.pdf]

Table S4. Correlation between tumor subgroups and clinicopathological parameters in HCC samples. Fisher's exact test was used to test the correlation between tumor subgroups and clinicopathological parameters.

| Parameter                      | Available Data | Group-1 | Group-2 | Group-3 | p-value <sup>a</sup> |
|--------------------------------|----------------|---------|---------|---------|----------------------|
| Age at diagnosis (Median=65.3) |                |         |         |         |                      |
| ≥65 years old                  | 59             | 9       | 7       | 15      | 0.55                 |
| <65 years old                  |                | 12      | 4       | 12      |                      |
| Gender                         |                |         |         |         |                      |
| Male                           | 59             | 19      | 10      | 23      | 0.87                 |
| Female                         |                | 2       | 1       | 4       |                      |
| HBV status                     |                |         |         |         |                      |
| postive                        | 59             | 12      | 6       | 18      | 0.73                 |
| negative                       |                | 9       | 5       | 9       |                      |
| Tumor size                     |                |         |         |         |                      |
| ≥5 cm                          | 59             | 12      | 6       | 15      | 1.00                 |
| <5 cm                          |                | 9       | 5       | 12      |                      |
| Differentiation (Edmonson)     |                |         |         |         |                      |
| I,II                           | 59             | 11      | 7       | 10      | 0.32                 |
| III,IV                         |                | 10      | 4       | 17      |                      |
| TNM staging                    |                |         |         |         |                      |
| 1                              | 58             | 13      | 3       | 16      | 0.25                 |
| 2,3                            |                | 8       | 7       | 11      |                      |
| Cirrhosis                      |                |         |         |         |                      |
| Absent                         | 58             | 12      | 6       | 19      | 0.59                 |
| Present                        |                | 8       | 5       | 8       |                      |
| Tumor Multifocality            |                |         |         |         |                      |
| Absent                         | 55             | 15      | 8       | 22      | 1.00                 |
| Present                        |                | 3       | 2       | 5       |                      |
| Tumor Encapsulation            |                |         |         |         |                      |
| Absent                         | 53             | 10      | 5       | 20      | 0.27                 |
| Present                        |                | 8       | 4       | 6       |                      |
| AFP level                      |                |         |         |         |                      |
| ≥100ng/ml                      | 51             | 6       | 2       | 7       | 0.85                 |
| <100ng/ml                      |                | 13      | 8       | 15      |                      |

<sup>a</sup>Fisher's Exact Test
