# Supplementary material for: Methylation Profiles Reveal Distinct Subgroup of Hepatocellular Carcinoma Patients with Poor Prognosis
Source: PubMed Central journal article supplement (PMC4122406; doi:10.1371/journal.pone.0104158), 2014-08-05
Supplement: pone.0104158.s010.pdf [file pone.0104158.s010.pdf]

Table S5. 4416 differentially methylated CpG loci between tumors and adjacent non-tumorous tissues.

| No. | Probeset ID | SYMBOL | Mean Difference ( $\Delta\beta$ ) | FDR adjusted P-value |
|-----|-------------|--------|-----------------------------------|----------------------|
| 1   | cg22568540  | A1BG   | -0.16                             | 4.83E-07             |
| 2   | cg27653134  | A2ML1  | -0.17                             | 4.51E-12             |
| 3   | cg03490200  | A2ML1  | -0.24                             | 2.34E-13             |
| 4   | cg09382492  | AANAT  | -0.14                             | 7.58E-08             |
| 5   | cg05292376  | AATK   | -0.17                             | 1.56E-10             |
| 6   | cg00949442  | ABCA3  | 0.52                              | 8.68E-36             |
| 7   | cg02331561  | ABCA3  | 0.10                              | 1.79E-02             |
| 8   | cg21643191  | ABCB5  | -0.16                             | 2.17E-08             |
| 9   | cg11429658  | ABCC13 | -0.12                             | 9.67E-06             |
| 10  | cg25781162  | ABCG5  | -0.12                             | 4.61E-05             |
| 11  | cg08453096  | ABCG5  | -0.13                             | 4.06E-06             |
| 12  | cg13984181  | ABHD7  | 0.37                              | 2.48E-16             |
| 13  | cg15156367  | ABHD7  | -0.12                             | 1.26E-07             |
| 14  | cg05488632  | ABHD9  | 0.45                              | 3.45E-33             |
| 15  | cg25839227  | ABI3   | -0.13                             | 1.18E-05             |
| 16  | cg21400896  | ABI3   | -0.19                             | 1.25E-10             |
| 17  | cg05026186  | ABLIM3 | -0.12                             | 1.75E-17             |
| 18  | cg07241568  | ABO    | 0.20                              | 5.82E-09             |
| 19  | cg11879188  | ABO    | -0.21                             | 7.61E-11             |
| 20  | cg25374854  | ABR    | 0.15                              | 2.48E-06             |
| 21  | cg15603885  | ABRA   | -0.18                             | 1.46E-08             |
| 22  | cg07005767  | ABRA   | -0.28                             | 6.14E-18             |
| 23  | cg03805442  | ACCN1  | -0.12                             | 6.27E-10             |
| 24  | cg02812142  | ACMSD  | -0.16                             | 1.36E-15             |
| 25  | cg10266490  | ACOT11 | 0.20                              | 3.00E-17             |
| 26  | cg26780333  | ACOT4  | 0.14                              | 4.39E-08             |
| 27  | cg08101264  | ACOT8  | 0.13                              | 4.53E-04             |
| 28  | cg17947599  | ACOXL  | -0.11                             | 9.98E-07             |
| 29  | cg07967308  | ACP5   | -0.10                             | 4.52E-06             |
| 30  | cg00400028  | ACPL2  | 0.18                              | 1.26E-07             |
| 31  | cg15782391  | ACPT   | -0.21                             | 2.62E-14             |
| 32  | cg27257408  | ACSBG1 | -0.12                             | 6.22E-08             |
| 33  | cg27087809  | ACSBG1 | -0.13                             | 5.60E-11             |
| 34  | cg08256781  | ACSBG2 | -0.17                             | 5.57E-12             |
| 35  | cg13849691  | ACSL5  | -0.11                             | 5.58E-04             |
| 36  | cg15988792  | ACSS1  | 0.23                              | 7.10E-10             |
| 37  | cg13547644  | ACTA1  | 0.21                              | 4.10E-07             |
| 38  | cg20025656  | ACTA1  | 0.12                              | 3.17E-04             |
| 39  | cg19517525  | ACTG1  | 0.35                              | 2.93E-11             |
| 40  | cg23173910  | ACTG2  | -0.16                             | 3.85E-11             |
| 41  | cg08572611  | ACTL6B | 0.30                              | 1.23E-10             |
| 42  | cg14088161  | ACTL6B | -0.10                             | 1.25E-06             |
| 43  | cg19863405  | ACTL7B | -0.18                             | 1.80E-11             |
| 44  | cg19685066  | ACTL8  | -0.30                             | 9.37E-16             |
| 45  | cg21376883  | ACTN2  | 0.10                              | 1.28E-03             |

|    |            |          |       |          |
|----|------------|----------|-------|----------|
| 46 | cg16159313 | ACY1     | -0.17 | 2.47E-06 |
| 47 | cg11096993 | ACY3     | -0.12 | 1.42E-07 |
| 48 | cg11668923 | ADAM12   | 0.15  | 3.13E-04 |
| 49 | cg23566335 | ADAM18   | -0.22 | 2.41E-14 |
| 50 | cg09079275 | ADAM19   | 0.14  | 5.16E-04 |
| 51 | cg09314766 | ADAM2    | -0.19 | 8.75E-14 |
| 52 | cg03716937 | ADAM2    | -0.25 | 3.05E-16 |
| 53 | cg05997860 | ADAM21   | -0.12 | 6.16E-08 |
| 54 | cg02998425 | ADAM21   | -0.19 | 1.46E-15 |
| 55 | cg16778809 | ADAM23   | 0.18  | 1.61E-06 |
| 56 | cg16411152 | ADAM29   | -0.23 | 5.59E-16 |
| 57 | cg14561282 | ADAM29   | -0.26 | 8.69E-19 |
| 58 | cg22333888 | ADAM33   | 0.12  | 1.12E-06 |
| 59 | cg16786703 | ADAM8    | 0.37  | 2.50E-17 |
| 60 | cg19730092 | ADAMTS14 | -0.11 | 8.99E-05 |
| 61 | cg02564733 | ADAMTS15 | 0.10  | 3.03E-04 |
| 62 | cg23727043 | ADAMTS7  | 0.19  | 2.05E-10 |
| 63 | cg01260219 | ADAMTS8  | -0.16 | 3.76E-09 |
| 64 | cg16714091 | ADAMTSL1 | 0.10  | 7.65E-04 |
| 65 | cg17644208 | ADCY3    | 0.11  | 2.27E-06 |
| 66 | cg12265829 | ADCY4    | 0.21  | 1.03E-07 |
| 67 | cg16761581 | ADCY4    | 0.18  | 3.70E-08 |
| 68 | cg13878010 | ADCY5    | 0.37  | 4.51E-16 |
| 69 | cg13384396 | ADCY5    | 0.33  | 7.78E-13 |
| 70 | cg07376535 | ADCYAP1  | 0.15  | 5.48E-07 |
| 71 | cg13626881 | ADORA1   | -0.12 | 1.94E-11 |
| 72 | cg21949305 | ADORA2A  | 0.22  | 1.16E-13 |
| 73 | cg02947253 | ADORA3   | -0.16 | 2.45E-08 |
| 74 | cg17963840 | ADRA1A   | 0.14  | 6.57E-05 |
| 75 | cg11934695 | ADRA1D   | 0.17  | 1.99E-06 |
| 76 | cg21542793 | ADRA2B   | 0.37  | 2.47E-20 |
| 77 | cg10235817 | ADRA2C   | 0.37  | 4.07E-25 |
| 78 | cg14826456 | ADRB1    | 0.34  | 2.94E-19 |
| 79 | cg17619823 | ADRB3    | 0.25  | 1.30E-09 |
| 80 | cg02126753 | AEBP1    | 0.15  | 4.32E-07 |
| 81 | cg15957394 | AFAP     | 0.26  | 2.50E-08 |
| 82 | cg19564367 | AFAP     | 0.22  | 6.67E-07 |
| 83 | cg11376198 | AFAR3    | -0.20 | 1.30E-11 |
| 84 | cg21201572 | AGR2     | -0.16 | 7.72E-08 |
| 85 | cg19125606 | AGT      | -0.11 | 4.56E-08 |
| 86 | cg22647018 | AGT      | -0.14 | 2.53E-08 |
| 87 | cg26637069 | AGTRL1   | -0.11 | 3.65E-04 |
| 88 | cg16967583 | AGXT     | -0.10 | 1.85E-10 |
| 89 | cg27050763 | AHCTF1   | -0.21 | 4.27E-08 |
| 90 | cg07361385 | AHSG     | -0.17 | 6.81E-09 |
| 91 | cg11003133 | AIM2     | -0.12 | 1.89E-05 |
| 92 | cg26770882 | AIPL1    | -0.16 | 9.61E-09 |
| 93 | cg18876487 | AIRE     | -0.19 | 1.65E-12 |
| 94 | cg20959866 | AJAP1    | 0.15  | 7.99E-05 |
| 95 | cg17525406 | AJAP1    | 0.13  | 7.57E-04 |

|     |            |          |       |          |
|-----|------------|----------|-------|----------|
| 96  | cg11714502 | AK1      | -0.11 | 2.35E-05 |
| 97  | cg11630242 | AKAP10   | 0.23  | 1.08E-10 |
| 98  | cg01555431 | AKAP12   | 0.17  | 1.83E-05 |
| 99  | cg15083233 | AKAP2    | 0.21  | 4.35E-11 |
| 100 | cg19176447 | AKAP2    | 0.17  | 5.40E-11 |
| 101 | cg07892051 | AKAP3    | -0.11 | 2.27E-08 |
| 102 | cg04254119 | AKAP3    | -0.13 | 1.14E-08 |
| 103 | cg13801416 | AKR1B1   | 0.40  | 3.56E-15 |
| 104 | cg18416881 | AKR1B1   | 0.29  | 6.33E-13 |
| 105 | cg11693019 | AKR1B10  | -0.17 | 2.08E-12 |
| 106 | cg11314684 | AKT3     | -0.14 | 2.56E-10 |
| 107 | cg22637834 | AKT3     | -0.19 | 1.40E-14 |
| 108 | cg03365437 | ALDH1A2  | 0.26  | 1.61E-10 |
| 109 | cg00930873 | ALDH1A2  | 0.25  | 6.79E-10 |
| 110 | cg19177941 | ALDH1A3  | 0.26  | 2.36E-12 |
| 111 | cg21631409 | ALDH3B2  | -0.17 | 2.88E-24 |
| 112 | cg06367117 | ALDOC    | 0.16  | 3.36E-04 |
| 113 | cg18277754 | ALK      | 0.10  | 1.86E-04 |
| 114 | cg03760483 | ALOX12   | 0.24  | 2.18E-14 |
| 115 | cg03742272 | ALOX12B  | -0.25 | 1.47E-16 |
| 116 | cg00501366 | ALOX12B  | -0.26 | 2.02E-22 |
| 117 | cg15843823 | ALOX15   | 0.17  | 2.53E-06 |
| 118 | cg18809289 | ALOX5    | 0.20  | 4.23E-09 |
| 119 | cg20645065 | ALPL     | 0.21  | 6.46E-07 |
| 120 | cg13605579 | ALPP     | -0.15 | 1.19E-09 |
| 121 | cg11052143 | ALS2CR11 | 0.28  | 3.34E-28 |
| 122 | cg15780361 | ALS2CR11 | 0.13  | 3.42E-11 |
| 123 | cg14144305 | ALX4     | 0.21  | 2.63E-09 |
| 124 | cg26365854 | ALX4     | 0.19  | 7.71E-08 |
| 125 | cg04988423 | ALX4     | 0.19  | 4.40E-06 |
| 126 | cg15817236 | ALX4     | 0.13  | 1.40E-05 |
| 127 | cg11260848 | ALX4     | 0.12  | 6.80E-04 |
| 128 | cg04549333 | ALX4     | 0.11  | 7.44E-05 |
| 129 | cg06630567 | AMBP     | -0.11 | 5.00E-05 |
| 130 | cg22296149 | AMH      | -0.12 | 8.34E-07 |
| 131 | cg07473175 | AMIGO2   | 0.32  | 1.24E-14 |
| 132 | cg13640200 | AMIGO2   | 0.32  | 4.04E-13 |
| 133 | cg08035082 | AMPD3    | -0.13 | 1.37E-07 |
| 134 | cg09966445 | AMPH     | -0.28 | 3.80E-12 |
| 135 | cg26507477 | AMY1A    | -0.11 | 3.69E-17 |
| 136 | cg21919219 | AMY1A    | -0.20 | 7.10E-15 |
| 137 | cg22215192 | AMY2A    | -0.15 | 9.44E-10 |
| 138 | cg26540515 | ANGPT4   | -0.23 | 4.95E-14 |
| 139 | cg19531130 | ANGPTL5  | 0.17  | 3.37E-11 |
| 140 | cg04508649 | ANGPTL7  | 0.24  | 1.25E-21 |
| 141 | cg26984624 | ANK1     | -0.16 | 1.40E-11 |
| 142 | cg02735486 | ANK2     | -0.12 | 1.26E-04 |
| 143 | cg08321346 | ANKMY1   | 0.35  | 1.18E-25 |
| 144 | cg27504117 | ANKMY1   | 0.15  | 1.05E-13 |
| 145 | cg26381783 | ANKRD15  | 0.33  | 6.79E-11 |

|     |            |          |       |          |
|-----|------------|----------|-------|----------|
| 146 | cg00344709 | ANKRD21  | -0.17 | 3.01E-10 |
| 147 | cg18493238 | ANKRD30A | -0.17 | 9.31E-11 |
| 148 | cg19219503 | ANKRD30A | -0.19 | 6.36E-09 |
| 149 | cg19948393 | ANKRD33  | 0.14  | 7.34E-08 |
| 150 | cg19974223 | ANKRD33  | 0.12  | 1.13E-08 |
| 151 | cg00625425 | ANKRD38  | -0.12 | 1.85E-04 |
| 152 | cg21435336 | ANKRD41  | 0.11  | 1.94E-06 |
| 153 | cg04446579 | ANKRD45  | 0.23  | 1.31E-14 |
| 154 | cg15883716 | ANKRD45  | 0.22  | 6.08E-14 |
| 155 | cg11075556 | ANKRD7   | -0.21 | 1.54E-16 |
| 156 | cg16192029 | ANKRD7   | -0.45 | 4.97E-23 |
| 157 | cg13003163 | ANP32D   | -0.12 | 4.02E-11 |
| 158 | cg15711744 | ANP32D   | -0.25 | 6.27E-15 |
| 159 | cg13042288 | ANPEP    | -0.11 | 1.32E-05 |
| 160 | cg20437604 | ANXA9    | -0.18 | 1.84E-13 |
| 161 | cg14451276 | AOAH     | 0.11  | 1.09E-05 |
| 162 | cg09472203 | AP3B2    | 0.25  | 2.33E-08 |
| 163 | cg13140464 | AP3B2    | -0.15 | 9.36E-11 |
| 164 | cg07490776 | AP3M2    | 0.13  | 3.53E-04 |
| 165 | cg12044210 | APBA2    | -0.15 | 1.83E-07 |
| 166 | cg21917349 | APBA2    | -0.15 | 2.87E-07 |
| 167 | cg16970232 | APC      | 0.42  | 2.56E-20 |
| 168 | cg21634602 | APC      | 0.41  | 4.04E-17 |
| 169 | cg20311501 | APC      | 0.35  | 1.61E-18 |
| 170 | cg24332422 | APC      | 0.32  | 2.19E-16 |
| 171 | cg15020645 | APC      | 0.26  | 4.63E-11 |
| 172 | cg01240931 | APC      | 0.12  | 6.22E-08 |
| 173 | cg19264571 | APCDD1   | 0.18  | 4.22E-13 |
| 174 | cg16222568 | APEG1    | -0.22 | 5.80E-13 |
| 175 | cg10062065 | APEG1    | -0.27 | 4.35E-17 |
| 176 | cg17207590 | APH1B    | 0.22  | 4.13E-12 |
| 177 | cg19995014 | APLP1    | 0.11  | 2.48E-04 |
| 178 | cg01053621 | APOA2    | -0.18 | 6.13E-14 |
| 179 | cg02157083 | APOA5    | 0.14  | 2.65E-07 |
| 180 | cg24309555 | APOB     | -0.11 | 1.98E-09 |
| 181 | cg16879115 | APOBEC1  | -0.11 | 4.15E-11 |
| 182 | cg22375610 | APOBEC2  | -0.15 | 1.58E-10 |
| 183 | cg22954818 | APOBEC3A | -0.18 | 2.03E-15 |
| 184 | cg07186138 | APOBEC3C | 0.17  | 1.52E-08 |
| 185 | cg26022401 | APOBEC3G | 0.14  | 1.44E-06 |
| 186 | cg27436184 | APOC2    | -0.11 | 1.90E-05 |
| 187 | cg04048249 | APOC3    | -0.12 | 1.58E-09 |
| 188 | cg20359349 | APR2     | -0.13 | 3.64E-05 |
| 189 | cg20176648 | AQP1     | -0.12 | 9.73E-06 |
| 190 | cg20713492 | AQP10    | -0.12 | 4.00E-06 |
| 191 | cg01447817 | AQP12A   | -0.14 | 1.77E-06 |
| 192 | cg06356454 | AQP12A   | -0.14 | 4.47E-07 |
| 193 | cg07047653 | AQP2     | -0.10 | 1.74E-08 |
| 194 | cg12650635 | AQP2     | -0.18 | 1.54E-09 |
| 195 | cg08594695 | AQP4     | -0.12 | 1.65E-08 |

|     |            |          |       |          |
|-----|------------|----------|-------|----------|
| 196 | cg23855989 | AQP5     | 0.13  | 2.58E-07 |
| 197 | cg24352499 | AQP6     | -0.12 | 3.10E-17 |
| 198 | cg13246269 | AQP7     | -0.14 | 5.89E-15 |
| 199 | cg07327347 | AQP8     | -0.12 | 2.69E-05 |
| 200 | cg09954385 | ARHGAP8  | 0.26  | 9.13E-11 |
| 201 | cg10925082 | ARHGDI8  | -0.14 | 5.50E-09 |
| 202 | cg03050522 | ARHGEF1  | 0.15  | 2.71E-05 |
| 203 | cg14681767 | ARHGEF10 | 0.14  | 1.39E-04 |
| 204 | cg24919884 | ARHGEF16 | -0.10 | 2.58E-04 |
| 205 | cg27377450 | ARHGEF18 | -0.12 | 5.41E-13 |
| 206 | cg02981853 | ARHGEF18 | -0.20 | 1.31E-11 |
| 207 | cg18669381 | ARHGEF19 | -0.11 | 2.18E-10 |
| 208 | cg11469778 | ARHGEF4  | -0.12 | 5.08E-04 |
| 209 | cg24697329 | ARHGEF4  | -0.15 | 1.51E-06 |
| 210 | cg00557354 | ARHGEF7  | 0.13  | 1.57E-03 |
| 211 | cg16427670 | ARHGEF7  | 0.12  | 2.05E-04 |
| 212 | cg18084554 | ARID3A   | 0.11  | 3.56E-05 |
| 213 | cg11673092 | ARMC3    | 0.12  | 2.51E-04 |
| 214 | cg02512226 | ARMC4    | 0.13  | 1.46E-07 |
| 215 | cg17942553 | ARNT     | -0.11 | 2.77E-07 |
| 216 | cg20775959 | ARNT2    | 0.14  | 7.01E-05 |
| 217 | cg17788682 | ARNT2    | 0.11  | 1.39E-03 |
| 218 | cg14365123 | ARPM2    | -0.26 | 8.05E-14 |
| 219 | cg25384157 | ARRDC1   | 0.15  | 3.93E-07 |
| 220 | cg08558340 | ARS2     | 0.22  | 2.21E-11 |
| 221 | cg21407055 | ART1     | -0.19 | 4.03E-11 |
| 222 | cg25221254 | ASAH3    | -0.25 | 1.18E-14 |
| 223 | cg26159905 | ASB10    | -0.13 | 1.18E-11 |
| 224 | cg21038703 | ASB16    | -0.12 | 8.43E-07 |
| 225 | cg19949550 | ASB2     | -0.15 | 1.35E-06 |
| 226 | cg26847490 | ASB4     | -0.12 | 4.71E-08 |
| 227 | cg11554605 | ASB4     | -0.15 | 1.47E-06 |
| 228 | cg12182525 | ASB5     | -0.16 | 3.05E-15 |
| 229 | cg06263495 | ASCL2    | 0.38  | 4.08E-19 |
| 230 | cg14785449 | ASNS     | 0.24  | 9.30E-10 |
| 231 | cg01245656 | ASNS     | 0.22  | 8.24E-09 |
| 232 | cg16540704 | ASZ1     | -0.22 | 2.25E-14 |
| 233 | cg09911342 | ASZ1     | -0.25 | 2.36E-13 |
| 234 | cg27383362 | ATAD3C   | -0.13 | 3.98E-08 |
| 235 | cg24027342 | ATM      | -0.11 | 2.16E-24 |
| 236 | cg10734665 | ATP10A   | -0.11 | 8.51E-04 |
| 237 | cg08828036 | ATP10A   | -0.12 | 4.78E-06 |
| 238 | cg14001035 | ATP10A   | -0.17 | 1.15E-10 |
| 239 | cg17260954 | ATP10A   | -0.18 | 4.85E-13 |
| 240 | cg19930802 | ATP10A   | -0.24 | 1.36E-19 |
| 241 | cg26062856 | ATP10A   | -0.25 | 5.39E-16 |
| 242 | cg20119871 | ATP10A   | -0.30 | 7.09E-20 |
| 243 | cg11015241 | ATP10A   | -0.34 | 1.71E-24 |
| 244 | cg12582965 | ATP10A   | -0.36 | 1.25E-18 |
| 245 | cg13337662 | ATP12A   | -0.20 | 7.23E-11 |

|     |            |          |       |          |
|-----|------------|----------|-------|----------|
| 246 | cg09580336 | ATP1A1   | 0.25  | 3.76E-19 |
| 247 | cg07051960 | ATP1A3   | -0.12 | 4.47E-12 |
| 248 | cg06517798 | ATP1A4   | -0.25 | 1.16E-17 |
| 249 | cg01914242 | ATP2A3   | 0.16  | 7.98E-06 |
| 250 | cg06123346 | ATP4A    | -0.16 | 4.76E-22 |
| 251 | cg06811800 | ATP4B    | -0.22 | 2.58E-16 |
| 252 | cg08995424 | ATP5G2   | 0.31  | 1.89E-16 |
| 253 | cg03665605 | ATP5J2   | -0.17 | 7.43E-14 |
| 254 | cg02491878 | ATP6V0A4 | -0.13 | 3.78E-07 |
| 255 | cg26349773 | ATP6V0A4 | -0.17 | 1.41E-06 |
| 256 | cg05483509 | ATP6V0C  | 0.29  | 7.27E-17 |
| 257 | cg01248426 | ATP6V0D2 | -0.16 | 9.59E-11 |
| 258 | cg00319692 | ATP6V0D2 | -0.22 | 2.65E-15 |
| 259 | cg06946880 | ATP6V1B1 | -0.14 | 1.71E-07 |
| 260 | cg07052880 | ATP6V1B1 | -0.19 | 1.04E-10 |
| 261 | cg27485921 | ATP6V1E2 | -0.11 | 2.89E-07 |
| 262 | cg18236477 | ATP8A2   | 0.28  | 1.70E-10 |
| 263 | cg12111714 | ATP8A2   | 0.22  | 4.38E-12 |
| 264 | cg04335339 | ATRNL1   | 0.15  | 1.95E-07 |
| 265 | cg02028524 | ATXN3    | -0.24 | 1.62E-13 |
| 266 | cg15001381 | AXIN1    | 0.12  | 2.45E-03 |
| 267 | cg16176379 | AYTL1    | 0.17  | 6.69E-06 |
| 268 | cg19465374 | AZGP1    | -0.10 | 3.55E-04 |
| 269 | cg12019109 | AZGP1    | -0.16 | 2.06E-12 |
| 270 | cg16608652 | B3GALT2  | 0.15  | 2.25E-07 |
| 271 | cg12716838 | B3GALT3  | 0.26  | 1.19E-08 |
| 272 | cg26709720 | B3GALT5  | -0.17 | 4.55E-12 |
| 273 | cg20557104 | B3GALT7  | 0.17  | 3.35E-11 |
| 274 | cg11038843 | B3GAT1   | 0.11  | 7.93E-04 |
| 275 | cg27049761 | B3GNT4   | 0.21  | 1.11E-07 |
| 276 | cg17701886 | B3GNT5   | 0.16  | 6.81E-06 |
| 277 | cg02238826 | B3GNT5   | 0.16  | 4.33E-06 |
| 278 | cg11065385 | B4GALNT3 | 0.14  | 1.56E-06 |
| 279 | cg05769161 | B4GALNT3 | 0.14  | 1.09E-06 |
| 280 | cg16004226 | B4GALNT4 | 0.18  | 5.39E-06 |
| 281 | cg02930996 | B4GALT6  | 0.28  | 2.82E-17 |
| 282 | cg07027513 | B4GALT6  | 0.28  | 9.51E-17 |
| 283 | cg10918202 | BAALC    | 0.24  | 1.41E-07 |
| 284 | cg25906419 | BACE2    | 0.15  | 2.14E-05 |
| 285 | cg09143663 | BACH1    | -0.13 | 2.67E-06 |
| 286 | cg26287988 | BAGE     | -0.13 | 2.86E-12 |
| 287 | cg07973461 | BAGE     | -0.23 | 6.46E-19 |
| 288 | cg20994561 | BAI1     | -0.27 | 1.24E-17 |
| 289 | cg07679836 | BAK1     | 0.19  | 4.07E-09 |
| 290 | cg00332153 | BANK1    | 0.19  | 1.15E-06 |
| 291 | cg20073553 | BAPX1    | 0.38  | 9.83E-23 |
| 292 | cg12622986 | BARHL1   | 0.13  | 3.26E-06 |
| 293 | cg17241310 | BARHL2   | 0.28  | 8.12E-10 |
| 294 | cg23496260 | BASP1    | 0.14  | 2.27E-06 |
| 295 | cg10006582 | BBS5     | 0.14  | 1.20E-06 |

|     |            |         |       |          |
|-----|------------|---------|-------|----------|
| 296 | cg21475402 | BCAN    | 0.37  | 3.18E-17 |
| 297 | cg18060199 | BCAR3   | 0.25  | 1.63E-08 |
| 298 | cg18917378 | BCAS1   | -0.12 | 1.77E-07 |
| 299 | cg10764357 | BCAT1   | 0.12  | 1.03E-04 |
| 300 | cg12584718 | BCDIN3  | 0.11  | 3.28E-05 |
| 301 | cg22166290 | BCL11A  | 0.12  | 6.83E-05 |
| 302 | cg21602520 | BCL2    | 0.37  | 2.07E-15 |
| 303 | cg17602451 | BCL2    | 0.31  | 4.59E-11 |
| 304 | cg11507178 | BCL9L   | 0.15  | 8.46E-05 |
| 305 | cg24789424 | BDH     | -0.14 | 1.13E-07 |
| 306 | cg02214188 | BDH2    | -0.11 | 3.45E-09 |
| 307 | cg10528989 | BDKRB1  | -0.11 | 6.74E-06 |
| 308 | cg20383064 | BFSP2   | -0.14 | 3.42E-09 |
| 309 | cg25249068 | BFSP2   | -0.17 | 5.94E-09 |
| 310 | cg26453588 | BIK     | 0.23  | 5.28E-17 |
| 311 | cg17237881 | BIRC7   | -0.17 | 2.40E-13 |
| 312 | cg09377486 | BIRC8   | -0.10 | 6.83E-07 |
| 313 | cg24454579 | BIRC8   | -0.18 | 3.30E-11 |
| 314 | cg03860768 | BLK     | -0.26 | 2.40E-20 |
| 315 | cg02226939 | BLMH    | 0.14  | 3.46E-06 |
| 316 | cg17571291 | BLVRA   | 0.11  | 1.53E-04 |
| 317 | cg23587532 | BM88    | -0.16 | 8.95E-09 |
| 318 | cg14310034 | BMP4    | 0.44  | 6.79E-23 |
| 319 | cg03447931 | BMP6    | 0.23  | 1.49E-07 |
| 320 | cg07479491 | BMP6    | 0.11  | 6.69E-06 |
| 321 | cg26516759 | BMP7    | 0.12  | 3.36E-04 |
| 322 | cg03664992 | BMP8A   | 0.29  | 1.39E-12 |
| 323 | cg07082331 | BMP8B   | 0.18  | 1.12E-06 |
| 324 | cg17561435 | BMPER   | 0.17  | 3.40E-06 |
| 325 | cg18952647 | BNC1    | 0.28  | 1.91E-11 |
| 326 | cg19988449 | BNC1    | 0.23  | 1.32E-09 |
| 327 | cg10398682 | BNC1    | 0.20  | 3.47E-09 |
| 328 | cg21762589 | BNIP3   | 0.12  | 3.14E-11 |
| 329 | cg18742893 | BOC     | 0.12  | 8.69E-05 |
| 330 | cg17560332 | BOLL    | 0.36  | 1.21E-22 |
| 331 | cg10124201 | BOLL    | 0.10  | 2.58E-04 |
| 332 | cg14115346 | BPHL    | -0.12 | 3.43E-13 |
| 333 | cg08254089 | BPI     | -0.15 | 4.52E-16 |
| 334 | cg15494458 | BPI     | -0.16 | 8.45E-14 |
| 335 | cg10968815 | BPIL1   | -0.13 | 1.54E-07 |
| 336 | cg13696012 | BPIL1   | -0.13 | 4.53E-06 |
| 337 | cg27195224 | BPIL2   | -0.18 | 7.24E-16 |
| 338 | cg18223379 | BPIL3   | -0.19 | 1.61E-12 |
| 339 | cg02309431 | BPIL3   | -0.22 | 9.29E-13 |
| 340 | cg14732540 | BRDT    | -0.10 | 2.11E-03 |
| 341 | cg00307685 | BRDT    | -0.19 | 4.55E-12 |
| 342 | cg16313343 | BRF1    | 0.22  | 1.72E-07 |
| 343 | cg01468621 | BRSK2   | 0.17  | 2.94E-05 |
| 344 | cg14021073 | BRSK2   | 0.15  | 3.08E-07 |
| 345 | cg21801378 | BRUNOL6 | 0.48  | 6.85E-23 |

|     |            |           |       |          |
|-----|------------|-----------|-------|----------|
| 346 | cg16778903 | BRUNOL6   | 0.46  | 1.09E-20 |
| 347 | cg01532103 | BSG       | 0.11  | 9.12E-03 |
| 348 | cg14615807 | BSND      | -0.13 | 1.60E-12 |
| 349 | cg19971655 | BSND      | -0.14 | 2.02E-12 |
| 350 | cg14603345 | BTBD3     | -0.20 | 4.21E-11 |
| 351 | cg21291985 | BTBD4     | -0.14 | 8.63E-07 |
| 352 | cg23034818 | BTBD6     | 0.19  | 1.02E-05 |
| 353 | cg09450238 | BTBD6     | 0.12  | 6.71E-07 |
| 354 | cg19302283 | BTC       | -0.10 | 1.97E-12 |
| 355 | cg18204685 | BTD       | -0.14 | 9.76E-08 |
| 356 | cg14380517 | BTG3      | 0.18  | 1.19E-06 |
| 357 | cg23211240 | BTG4      | 0.17  | 4.92E-05 |
| 358 | cg01192900 | BTG4      | 0.14  | 1.18E-05 |
| 359 | cg22879515 | BTG4      | 0.13  | 1.40E-06 |
| 360 | cg25391023 | BTNL2     | -0.11 | 3.31E-10 |
| 361 | cg24024214 | BTNL8     | -0.16 | 9.44E-12 |
| 362 | cg15516226 | BTNL9     | -0.36 | 1.41E-18 |
| 363 | cg20624391 | BVES      | 0.13  | 3.23E-07 |
| 364 | cg22182666 | BZRAP1    | -0.14 | 4.75E-08 |
| 365 | cg16063112 | C10orf107 | 0.13  | 1.99E-05 |
| 366 | cg15227982 | C10orf26  | 0.14  | 1.11E-07 |
| 367 | cg09405083 | C10orf26  | 0.10  | 2.57E-05 |
| 368 | cg10548978 | C10orf27  | -0.15 | 2.25E-09 |
| 369 | cg01560871 | C10orf27  | -0.28 | 5.60E-21 |
| 370 | cg08397758 | C10orf33  | 0.21  | 1.30E-08 |
| 371 | cg03852570 | C10orf33  | 0.20  | 1.19E-07 |
| 372 | cg05942970 | C10orf39  | -0.20 | 5.38E-10 |
| 373 | cg06985415 | C10orf39  | -0.23 | 3.72E-11 |
| 374 | cg13985639 | C10orf65  | 0.10  | 2.04E-04 |
| 375 | cg08427977 | C10orf72  | -0.15 | 1.31E-09 |
| 376 | cg22045288 | C10orf91  | -0.14 | 2.76E-14 |
| 377 | cg04126866 | C10orf99  | -0.11 | 1.49E-09 |
| 378 | cg01558777 | C10orf99  | -0.23 | 7.64E-20 |
| 379 | cg03805684 | C11orf10  | -0.17 | 4.98E-18 |
| 380 | cg01643624 | C11orf16  | -0.18 | 1.03E-12 |
| 381 | cg07747336 | C11orf38  | -0.14 | 8.31E-17 |
| 382 | cg23743472 | C11orf38  | -0.30 | 4.31E-22 |
| 383 | cg25943276 | C11orf39  | -0.26 | 1.56E-16 |
| 384 | cg02477931 | C11orf39  | -0.26 | 3.56E-18 |
| 385 | cg16270990 | C11orf44  | -0.13 | 2.83E-06 |
| 386 | cg13125510 | C11orf44  | -0.20 | 7.71E-17 |
| 387 | cg19310430 | C11orf45  | 0.13  | 3.31E-05 |
| 388 | cg01335367 | C12orf34  | 0.13  | 3.83E-09 |
| 389 | cg02351381 | C12orf34  | 0.13  | 5.54E-09 |
| 390 | cg14738823 | C12orf46  | -0.17 | 2.88E-15 |
| 391 | cg13435792 | C12orf46  | -0.22 | 3.41E-12 |
| 392 | cg24276491 | C14orf11  | -0.18 | 7.56E-11 |
| 393 | cg22247240 | C14orf115 | -0.17 | 2.23E-07 |
| 394 | cg20022541 | C14orf152 | -0.31 | 4.29E-17 |
| 395 | cg14912575 | C14orf162 | 0.15  | 3.61E-09 |



|     |            |          |       |          |
|-----|------------|----------|-------|----------|
| 396 | cg12281657 | C14orf50 | 0.40  | 4.82E-20 |
| 397 | cg04536575 | C14orf50 | 0.11  | 5.09E-05 |
| 398 | cg00239071 | C14orf68 | 0.21  | 2.91E-19 |
| 399 | cg27394486 | C15orf2  | -0.37 | 3.49E-16 |
| 400 | cg25455753 | C15orf32 | -0.28 | 2.08E-24 |
| 401 | cg17978274 | C15orf32 | -0.34 | 4.62E-19 |
| 402 | cg11911951 | C16orf28 | -0.13 | 5.48E-07 |
| 403 | cg23617760 | C16orf44 | -0.25 | 2.15E-11 |
| 404 | cg23093496 | C16orf54 | 0.12  | 7.76E-07 |
| 405 | cg18017908 | C17orf76 | 0.13  | 2.44E-06 |
| 406 | cg03686067 | C18orf14 | -0.10 | 1.17E-07 |
| 407 | cg15081561 | C18orf14 | -0.20 | 5.71E-13 |
| 408 | cg00729275 | C18orf16 | -0.10 | 1.92E-05 |
| 409 | cg10054857 | C18orf20 | -0.10 | 3.99E-06 |
| 410 | cg01722450 | C18orf20 | -0.14 | 5.67E-10 |
| 411 | cg24300924 | C18orf43 | 0.41  | 2.73E-17 |
| 412 | cg12796229 | C18orf43 | 0.29  | 6.32E-11 |
| 413 | cg12334759 | C19orf19 | -0.23 | 4.34E-19 |
| 414 | cg20973210 | C19orf35 | 0.26  | 8.17E-16 |
| 415 | cg08047907 | C1orf114 | 0.22  | 5.40E-09 |
| 416 | cg21852292 | C1orf115 | 0.21  | 4.71E-10 |
| 417 | cg01119135 | C1orf116 | -0.15 | 3.64E-09 |
| 418 | cg15459773 | C1orf124 | -0.12 | 4.27E-06 |
| 419 | cg04636557 | C1orf124 | -0.18 | 7.69E-11 |
| 420 | cg05352668 | C1orf127 | -0.16 | 4.42E-10 |
| 421 | cg18908499 | C1orf150 | -0.13 | 1.36E-08 |
| 422 | cg05767404 | C1orf150 | -0.19 | 3.60E-20 |
| 423 | cg09440340 | C1orf161 | -0.12 | 3.55E-08 |
| 424 | cg01267315 | C1orf164 | 0.13  | 3.48E-05 |
| 425 | cg15731815 | C1orf188 | 0.11  | 3.79E-06 |
| 426 | cg25182523 | C1orf24  | -0.12 | 1.21E-08 |
| 427 | cg12588301 | C1orf42  | -0.28 | 1.97E-19 |
| 428 | cg11750883 | C1orf42  | -0.30 | 6.47E-20 |
| 429 | cg08460435 | C1orf59  | 0.33  | 2.70E-23 |
| 430 | cg08887581 | C1orf64  | -0.12 | 9.43E-05 |
| 431 | cg24525573 | C1orf64  | -0.15 | 6.52E-09 |
| 432 | cg13449778 | C1orf76  | 0.18  | 3.51E-07 |
| 433 | cg05421688 | C1orf76  | 0.11  | 8.12E-06 |
| 434 | cg18870231 | C1orf87  | -0.11 | 4.97E-07 |
| 435 | cg21926138 | C1orf88  | 0.16  | 5.28E-07 |
| 436 | cg11524446 | C1orf94  | -0.12 | 3.61E-04 |
| 437 | cg00108454 | C1QA     | -0.10 | 6.48E-12 |
| 438 | cg25995460 | C1QA     | -0.14 | 5.20E-08 |
| 439 | cg22477971 | C1QB     | -0.25 | 6.96E-21 |
| 440 | cg03941108 | C1QB     | -0.27 | 2.08E-19 |
| 441 | cg11393848 | C1QC     | -0.11 | 8.71E-19 |
| 442 | cg00136477 | C1QC     | -0.16 | 1.43E-14 |
| 443 | cg13818573 | C1QL1    | 0.17  | 3.61E-05 |
| 444 | cg21023001 | C1QR1    | -0.27 | 1.11E-18 |
| 445 | cg19138960 | C1QR1    | -0.29 | 2.78E-17 |

|     |            |           |       |          |
|-----|------------|-----------|-------|----------|
| 446 | cg24844534 | C1QTNF1   | 0.13  | 1.52E-04 |
| 447 | cg26090652 | C1QTNF5   | 0.33  | 7.45E-17 |
| 448 | cg20483374 | C1QTNF5   | 0.20  | 3.47E-08 |
| 449 | cg04369341 | C20orf100 | 0.27  | 3.53E-12 |
| 450 | cg11319389 | C20orf100 | 0.26  | 1.14E-10 |
| 451 | cg04405541 | C20orf114 | -0.18 | 2.55E-07 |
| 452 | cg22789545 | C20orf114 | -0.21 | 1.45E-12 |
| 453 | cg01265637 | C20orf141 | -0.11 | 2.11E-09 |
| 454 | cg19470701 | C20orf149 | 0.15  | 1.44E-04 |
| 455 | cg11154879 | C20orf151 | -0.14 | 1.62E-08 |
| 456 | cg16796951 | C20orf152 | -0.11 | 2.56E-08 |
| 457 | cg24691461 | C20orf160 | -0.10 | 2.29E-08 |
| 458 | cg11801374 | C20orf160 | -0.27 | 2.53E-19 |
| 459 | cg26111757 | C20orf185 | -0.18 | 1.49E-09 |
| 460 | cg16483466 | C20orf186 | -0.22 | 2.02E-12 |
| 461 | cg24122922 | C20orf39  | -0.20 | 1.82E-12 |
| 462 | cg06668073 | C20orf42  | 0.12  | 1.53E-04 |
| 463 | cg11113534 | C20orf70  | -0.14 | 8.71E-07 |
| 464 | cg01671881 | C20orf71  | -0.15 | 3.08E-07 |
| 465 | cg27132814 | C20orf79  | -0.11 | 6.35E-10 |
| 466 | cg20998885 | C20orf79  | -0.24 | 2.01E-16 |
| 467 | cg15310873 | C20orf85  | -0.10 | 1.31E-03 |
| 468 | cg12813792 | C20orf85  | -0.10 | 1.73E-08 |
| 469 | cg21663722 | C20orf91  | -0.22 | 7.11E-20 |
| 470 | cg07611334 | C20orf98  | 0.30  | 3.52E-10 |
| 471 | cg08713365 | C20orf98  | 0.19  | 1.51E-07 |
| 472 | cg06940107 | C21orf100 | -0.14 | 4.66E-12 |
| 473 | cg10569414 | C21orf121 | -0.11 | 4.98E-04 |
| 474 | cg23178308 | C21orf124 | 0.18  | 1.09E-04 |
| 475 | cg13520715 | C21orf129 | -0.15 | 2.36E-07 |
| 476 | cg27544190 | C21orf63  | 0.13  | 5.40E-05 |
| 477 | cg21968796 | C21orf70  | 0.10  | 8.10E-08 |
| 478 | cg12003230 | C21orf84  | 0.11  | 6.42E-10 |
| 479 | cg23732182 | C21orf84  | -0.11 | 1.66E-04 |
| 480 | cg10756887 | C22orf15  | 0.17  | 1.57E-12 |
| 481 | cg14127659 | C22orf23  | -0.14 | 2.28E-08 |
| 482 | cg13438834 | C22orf8   | 0.16  | 2.84E-05 |
| 483 | cg06575572 | C22orf8   | 0.14  | 1.53E-04 |
| 484 | cg14419187 | C2orf21   | 0.13  | 6.67E-05 |
| 485 | cg11084611 | C2orf27   | -0.16 | 2.01E-15 |
| 486 | cg07080358 | C2orf32   | 0.20  | 2.67E-08 |
| 487 | cg03338189 | C2orf4    | 0.18  | 2.40E-08 |
| 488 | cg22751696 | C3orf14   | 0.10  | 2.31E-05 |
| 489 | cg08145590 | C3orf15   | 0.10  | 9.08E-03 |
| 490 | cg02765820 | C3orf22   | -0.16 | 2.85E-13 |
| 491 | cg07084746 | C3orf27   | -0.14 | 2.12E-10 |
| 492 | cg22068211 | C3orf27   | -0.20 | 1.24E-14 |
| 493 | cg02100848 | C3orf32   | -0.14 | 7.89E-08 |
| 494 | cg04757243 | C3orf36   | -0.11 | 3.65E-07 |
| 495 | cg18989919 | C3orf36   | -0.18 | 4.87E-11 |

|     |            |          |       |          |
|-----|------------|----------|-------|----------|
| 496 | cg05570980 | C3orf52  | 0.22  | 3.62E-10 |
| 497 | cg06807989 | C3orf52  | 0.17  | 1.63E-06 |
| 498 | cg18919097 | C3orf57  | 0.14  | 5.22E-05 |
| 499 | cg07109801 | C3orf60  | -0.20 | 5.31E-14 |
| 500 | cg20835282 | C3orf62  | 0.25  | 2.94E-07 |
| 501 | cg07758574 | C3orf62  | 0.14  | 1.13E-07 |
| 502 | cg05659947 | C4BPB    | -0.19 | 1.69E-18 |
| 503 | cg22197830 | C5orf14  | -0.15 | 4.81E-07 |
| 504 | cg14722162 | C5orf20  | -0.17 | 1.19E-12 |
| 505 | cg13349425 | C5orf20  | -0.27 | 8.14E-22 |
| 506 | cg10257049 | C5orf4   | 0.12  | 5.88E-04 |
| 507 | cg05799317 | C6orf118 | -0.25 | 5.64E-18 |
| 508 | cg24549507 | C6orf145 | 0.20  | 7.22E-07 |
| 509 | cg16150435 | C6orf15  | -0.13 | 6.52E-09 |
| 510 | cg00463577 | C6orf150 | 0.27  | 3.17E-09 |
| 511 | cg09527362 | C6orf150 | 0.13  | 3.58E-03 |
| 512 | cg04600618 | C6orf206 | 0.51  | 3.09E-30 |
| 513 | cg01344171 | C6orf206 | 0.19  | 9.09E-18 |
| 514 | cg23973566 | C6orf32  | -0.11 | 1.97E-05 |
| 515 | cg12818699 | C6orf32  | -0.20 | 4.96E-11 |
| 516 | cg23216015 | C7orf16  | -0.15 | 5.08E-17 |
| 517 | cg02564523 | C7orf19  | 0.15  | 3.25E-04 |
| 518 | cg10833091 | C7orf23  | 0.15  | 1.51E-08 |
| 519 | cg04999691 | C7orf29  | 0.22  | 1.37E-13 |
| 520 | cg22298208 | C7orf34  | -0.13 | 3.78E-09 |
| 521 | cg04612566 | C8orf31  | -0.19 | 3.48E-12 |
| 522 | cg15642035 | C8ORFK32 | -0.12 | 2.11E-05 |
| 523 | cg06276653 | C8ORFK32 | -0.20 | 6.47E-11 |
| 524 | cg00755043 | C9orf121 | 0.36  | 4.95E-19 |
| 525 | cg15785720 | C9orf140 | 0.14  | 1.78E-04 |
| 526 | cg01126560 | C9orf142 | 0.11  | 5.48E-04 |
| 527 | cg06484397 | C9orf19  | 0.13  | 5.59E-05 |
| 528 | cg17509612 | C9orf78  | 0.10  | 1.55E-04 |
| 529 | cg17191715 | CA1      | -0.14 | 5.82E-09 |
| 530 | cg18503260 | CA13     | 0.14  | 4.61E-06 |
| 531 | cg18674980 | CA3      | 0.34  | 1.03E-15 |
| 532 | cg22289837 | CA3      | 0.21  | 8.50E-11 |
| 533 | cg04532952 | CA4      | 0.21  | 4.26E-09 |
| 534 | cg18743730 | CA4      | -0.12 | 1.32E-06 |
| 535 | cg11667117 | CA5A     | -0.10 | 1.30E-04 |
| 536 | cg12343082 | CA5A     | -0.14 | 1.65E-07 |
| 537 | cg11258532 | CA7      | -0.19 | 1.38E-15 |
| 538 | cg00983899 | CABP2    | -0.15 | 9.85E-13 |
| 539 | cg18138484 | CABP2    | -0.17 | 5.33E-09 |
| 540 | cg21518947 | CABP4    | -0.18 | 1.26E-14 |
| 541 | cg09422355 | CABP5    | -0.29 | 2.46E-19 |
| 542 | cg18534730 | CABP5    | -0.29 | 1.49E-20 |
| 543 | cg20256494 | CABP7    | 0.25  | 3.73E-09 |
| 544 | cg11956146 | CABYR    | 0.12  | 1.73E-03 |
| 545 | cg19304410 | CACHD1   | 0.30  | 2.23E-14 |

|     |            |          |       |          |
|-----|------------|----------|-------|----------|
| 546 | cg20876010 | CACHD1   | 0.16  | 9.80E-08 |
| 547 | cg25519930 | CACNA1C  | 0.10  | 2.17E-03 |
| 548 | cg01942127 | CACNA1D  | 0.15  | 4.54E-06 |
| 549 | cg11262815 | CACNA1G  | 0.22  | 2.86E-09 |
| 550 | cg05942574 | CACNA1G  | 0.15  | 5.06E-10 |
| 551 | cg18454685 | CACNA1G  | 0.14  | 1.56E-04 |
| 552 | cg00095526 | CACNA1S  | -0.14 | 4.21E-08 |
| 553 | cg06379754 | CACNA2D1 | 0.14  | 5.69E-05 |
| 554 | cg20089715 | CACNB1   | -0.14 | 3.19E-15 |
| 555 | cg04721098 | CACNG3   | -0.17 | 1.56E-18 |
| 556 | cg06226384 | CACNG5   | -0.13 | 3.29E-18 |
| 557 | cg22495124 | CACNG5   | -0.31 | 4.97E-17 |
| 558 | cg11128808 | CACNG6   | -0.26 | 4.88E-15 |
| 559 | cg09947274 | CAD      | -0.10 | 3.06E-04 |
| 560 | cg06295856 | CALCA    | 0.24  | 1.47E-10 |
| 561 | cg09068492 | CALCA    | 0.24  | 2.58E-10 |
| 562 | cg14348532 | CALCA    | 0.14  | 1.79E-06 |
| 563 | cg10467022 | CALCA    | 0.13  | 5.46E-06 |
| 564 | cg22183706 | CALCA    | 0.11  | 3.53E-06 |
| 565 | cg01971122 | CALCA    | 0.10  | 2.98E-05 |
| 566 | cg06938878 | CALCB    | -0.18 | 1.74E-10 |
| 567 | cg23239396 | CALCR    | 0.14  | 1.20E-05 |
| 568 | cg11828089 | CALN1    | -0.28 | 6.43E-17 |
| 569 | cg21003606 | CALN1    | -0.33 | 1.96E-18 |
| 570 | cg05497616 | CAMK4    | 0.14  | 6.44E-05 |
| 571 | cg13797282 | CARD10   | -0.13 | 3.09E-05 |
| 572 | cg18321354 | CARD11   | -0.24 | 3.58E-15 |
| 573 | cg05187322 | CARD14   | -0.17 | 1.95E-10 |
| 574 | cg26683005 | CARD8    | 0.13  | 3.10E-08 |
| 575 | cg13802966 | CASP1    | -0.13 | 2.68E-16 |
| 576 | cg16745604 | CASP10   | -0.10 | 3.87E-07 |
| 577 | cg01999333 | CASP14   | -0.13 | 1.94E-09 |
| 578 | cg09243021 | CASP2    | 0.16  | 3.07E-09 |
| 579 | cg17092637 | CASP4    | -0.15 | 7.00E-09 |
| 580 | cg23410113 | CASP8    | -0.10 | 2.65E-22 |
| 581 | cg09547777 | CASQ1    | -0.14 | 1.43E-09 |
| 582 | cg18942631 | CASQ2    | -0.11 | 7.95E-10 |
| 583 | cg05190718 | CASQ2    | -0.27 | 2.49E-22 |
| 584 | cg17453778 | CASR     | 0.13  | 7.23E-08 |
| 585 | cg04759439 | CAST1    | 0.24  | 3.27E-08 |
| 586 | cg08365982 | CAV3     | -0.23 | 1.85E-14 |
| 587 | cg24517042 | CAV3     | -0.27 | 6.36E-15 |
| 588 | cg13745346 | CBFA2T3  | -0.21 | 4.23E-14 |
| 589 | cg22780475 | CBLC     | -0.10 | 1.46E-03 |
| 590 | cg15869642 | CBLN1    | -0.17 | 1.43E-13 |
| 591 | cg25993718 | CBLN4    | 0.11  | 2.37E-03 |
| 592 | cg14564494 | CBR3     | 0.19  | 8.83E-12 |
| 593 | cg22633722 | CBS      | 0.21  | 6.88E-08 |
| 594 | cg02849695 | CCDC19   | 0.30  | 7.83E-19 |
| 595 | cg10051054 | CCDC27   | -0.20 | 9.21E-12 |

|     |            |         |       |          |
|-----|------------|---------|-------|----------|
| 596 | cg00891278 | CCDC37  | 0.42  | 7.40E-36 |
| 597 | cg20312228 | CCDC37  | 0.23  | 7.42E-19 |
| 598 | cg06468695 | CCDC42  | -0.12 | 3.56E-08 |
| 599 | cg20099806 | CCDC47  | -0.11 | 6.46E-14 |
| 600 | cg20131968 | CCDC47  | -0.16 | 1.48E-19 |
| 601 | cg24287460 | CCDC48  | -0.17 | 1.43E-11 |
| 602 | cg02498063 | CCDC60  | 0.12  | 1.45E-10 |
| 603 | cg02620769 | CCDC65  | 0.29  | 2.24E-12 |
| 604 | cg08958015 | CCDC65  | 0.20  | 1.16E-08 |
| 605 | cg11715966 | CCDC8   | -0.15 | 9.34E-08 |
| 606 | cg15248035 | CCIN    | -0.10 | 1.37E-05 |
| 607 | cg03724463 | CCK     | 0.15  | 1.21E-06 |
| 608 | cg04353483 | CCKAR   | -0.11 | 1.08E-07 |
| 609 | cg15928132 | CCKAR   | -0.17 | 8.88E-12 |
| 610 | cg17118262 | CCL1    | -0.14 | 3.46E-08 |
| 611 | cg20556988 | CCL1    | -0.22 | 4.43E-16 |
| 612 | cg24870391 | CCL11   | -0.26 | 2.24E-21 |
| 613 | cg02706575 | CCL13   | -0.13 | 1.67E-11 |
| 614 | cg24615251 | CCL13   | -0.16 | 1.05E-10 |
| 615 | cg07881407 | CCL14   | 0.11  | 1.94E-15 |
| 616 | cg05766474 | CCL16   | -0.15 | 8.31E-06 |
| 617 | cg08214029 | CCL18   | -0.24 | 1.18E-18 |
| 618 | cg09425228 | CCL20   | -0.13 | 9.04E-08 |
| 619 | cg21643045 | CCL20   | -0.31 | 2.68E-26 |
| 620 | cg05556717 | CCL26   | -0.13 | 1.94E-06 |
| 621 | cg12943082 | CCL26   | -0.14 | 1.11E-06 |
| 622 | cg15005385 | CCL3L1  | -0.16 | 3.09E-08 |
| 623 | cg25659818 | CCL4    | -0.20 | 1.25E-13 |
| 624 | cg08124722 | CCL7    | -0.31 | 8.51E-22 |
| 625 | cg01636591 | CCL8    | -0.12 | 1.66E-06 |
| 626 | cg27000831 | CCL8    | -0.14 | 4.45E-14 |
| 627 | cg16422907 | CCNA1   | 0.19  | 4.80E-07 |
| 628 | cg13060997 | CCNA1   | 0.12  | 1.58E-04 |
| 629 | cg09637363 | CCND1   | 0.10  | 3.79E-04 |
| 630 | cg12382902 | CCND2   | 0.20  | 2.17E-08 |
| 631 | cg00888007 | CCND2   | 0.15  | 2.11E-06 |
| 632 | cg16994506 | CCND2   | 0.14  | 2.79E-06 |
| 633 | cg02765328 | CCND2   | 0.11  | 2.04E-04 |
| 634 | cg25425078 | CCND2   | 0.11  | 1.37E-05 |
| 635 | cg08069899 | CCND2   | 0.11  | 1.41E-04 |
| 636 | cg06361108 | CCNF    | 0.16  | 1.03E-05 |
| 637 | cg04590978 | CCNJ    | 0.40  | 4.29E-19 |
| 638 | cg22864416 | CCNJ    | 0.35  | 3.56E-11 |
| 639 | cg09509673 | CCR10   | 0.14  | 3.26E-15 |
| 640 | cg04111761 | CCR3    | -0.13 | 5.63E-12 |
| 641 | cg22022041 | CCR9    | -0.14 | 1.71E-10 |
| 642 | cg16386080 | CCRK    | 0.24  | 7.79E-14 |
| 643 | cg12832565 | CD160   | 0.11  | 3.99E-10 |
| 644 | cg05436231 | CD164L2 | 0.31  | 1.21E-13 |
| 645 | cg14102807 | CD19    | -0.16 | 2.00E-11 |

|     |            |          |       |          |
|-----|------------|----------|-------|----------|
| 646 | cg07597976 | CD19     | -0.21 | 3.77E-16 |
| 647 | cg07950803 | CD1A     | -0.30 | 6.98E-30 |
| 648 | cg15952487 | CD1B     | -0.14 | 4.05E-17 |
| 649 | cg17399166 | CD1D     | -0.18 | 8.50E-07 |
| 650 | cg12200412 | CD1E     | -0.14 | 3.97E-23 |
| 651 | cg01618851 | CD209    | -0.15 | 3.97E-10 |
| 652 | cg15743985 | CD22     | -0.18 | 9.91E-08 |
| 653 | cg13164537 | CD226    | 0.14  | 9.89E-09 |
| 654 | cg00350296 | CD248    | 0.15  | 5.28E-10 |
| 655 | cg17677397 | CD300C   | -0.18 | 8.80E-14 |
| 656 | cg14173969 | CD300C   | -0.22 | 4.62E-15 |
| 657 | cg04995095 | CD300E   | -0.23 | 2.13E-29 |
| 658 | cg10523494 | CD300LB  | -0.11 | 8.54E-17 |
| 659 | cg06407137 | CD300LB  | -0.19 | 8.09E-13 |
| 660 | cg15374234 | CD300LF  | -0.24 | 9.61E-15 |
| 661 | cg21640749 | CD300LF  | -0.35 | 4.99E-19 |
| 662 | cg10129493 | CD33     | -0.32 | 1.12E-25 |
| 663 | cg19591881 | CD34     | 0.19  | 3.70E-08 |
| 664 | cg15046675 | CD37     | 0.10  | 1.39E-06 |
| 665 | cg26043257 | CD38     | 0.28  | 2.18E-10 |
| 666 | cg17640322 | CD44     | 0.11  | 1.72E-05 |
| 667 | cg13311440 | CD48     | -0.16 | 8.26E-09 |
| 668 | cg22325572 | CD53     | -0.13 | 4.24E-09 |
| 669 | cg07380416 | CD6      | -0.20 | 2.04E-08 |
| 670 | cg09902130 | CD6      | -0.24 | 5.70E-10 |
| 671 | cg18557145 | CD72     | -0.24 | 1.18E-14 |
| 672 | cg12971694 | CD72     | -0.29 | 5.07E-27 |
| 673 | cg05921699 | CD79A    | -0.12 | 2.58E-10 |
| 674 | cg25729716 | CD79B    | -0.10 | 9.95E-07 |
| 675 | cg07973967 | CD79B    | -0.11 | 4.79E-03 |
| 676 | cg21572897 | CD80     | -0.15 | 2.61E-12 |
| 677 | cg04387658 | CD86     | -0.12 | 6.60E-07 |
| 678 | cg17108819 | CD8A     | 0.33  | 1.32E-12 |
| 679 | cg02170525 | CD8A     | 0.15  | 6.68E-08 |
| 680 | cg26850754 | CD8B1    | 0.25  | 6.29E-11 |
| 681 | cg13164309 | CDA      | -0.21 | 7.79E-24 |
| 682 | cg00750606 | CDA      | -0.23 | 2.88E-22 |
| 683 | cg05469695 | CDC42EP3 | 0.11  | 2.95E-04 |
| 684 | cg08690031 | CDCA7    | 0.18  | 4.30E-06 |
| 685 | cg24975222 | CDCPI    | 0.33  | 5.67E-14 |
| 686 | cg17655614 | CDH1     | 0.17  | 1.23E-08 |
| 687 | cg11667754 | CDH1     | 0.11  | 2.13E-04 |
| 688 | cg19854301 | CDH13    | -0.20 | 1.49E-14 |
| 689 | cg16777782 | CDH13    | -0.22 | 9.65E-14 |
| 690 | cg02168291 | CDH13    | -0.22 | 7.71E-15 |
| 691 | cg14792480 | CDH16    | -0.12 | 7.07E-07 |
| 692 | cg20987610 | CDH17    | -0.23 | 8.76E-13 |
| 693 | cg12038710 | CDH17    | -0.33 | 7.31E-17 |
| 694 | cg03504701 | CDH18    | -0.39 | 2.13E-29 |
| 695 | cg18509435 | CDH20    | -0.12 | 8.13E-11 |

|     |            |         |       |          |
|-----|------------|---------|-------|----------|
| 696 | cg04640913 | CDH22   | -0.11 | 1.12E-07 |
| 697 | cg20895028 | CDH26   | -0.15 | 2.50E-09 |
| 698 | cg24607535 | CDH26   | -0.19 | 6.63E-14 |
| 699 | cg17733331 | CDH3    | 0.10  | 5.77E-04 |
| 700 | cg22319147 | CDH5    | -0.23 | 5.17E-12 |
| 701 | cg08872742 | CDH5    | -0.25 | 1.23E-21 |
| 702 | cg04155793 | CDK10   | -0.11 | 1.22E-07 |
| 703 | cg07471052 | CDK3    | -0.13 | 9.13E-05 |
| 704 | cg07658718 | CDK5R1  | 0.13  | 1.53E-04 |
| 705 | cg01920829 | CDK5R2  | 0.17  | 4.67E-06 |
| 706 | cg16077929 | CDKL1   | -0.12 | 4.37E-06 |
| 707 | cg24432073 | CDKL2   | 0.55  | 3.32E-34 |
| 708 | cg14988503 | CDKL2   | 0.49  | 2.94E-26 |
| 709 | cg20919799 | CDKN1C  | 0.34  | 6.17E-12 |
| 710 | cg23548479 | CDKN1C  | 0.34  | 2.63E-11 |
| 711 | cg23146358 | CDKN1C  | 0.27  | 5.52E-11 |
| 712 | cg17738133 | CDKN1C  | 0.17  | 1.71E-07 |
| 713 | cg04548378 | CDKN1C  | 0.14  | 6.82E-06 |
| 714 | cg05559445 | CDKN1C  | 0.14  | 1.64E-05 |
| 715 | cg09099744 | CDKN2A  | 0.59  | 2.40E-32 |
| 716 | cg10895543 | CDKN2A  | 0.45  | 1.94E-26 |
| 717 | cg07752420 | CDKN2A  | 0.43  | 1.29E-24 |
| 718 | cg12840719 | CDKN2A  | 0.33  | 6.50E-22 |
| 719 | cg11653709 | CDKN2A  | 0.28  | 6.78E-22 |
| 720 | cg10210238 | CDKN2B  | 0.28  | 3.26E-14 |
| 721 | cg06421800 | CDKN2B  | 0.18  | 3.59E-17 |
| 722 | cg08390209 | CDKN2B  | 0.11  | 1.01E-06 |
| 723 | cg04675937 | CDKN2B  | 0.11  | 2.32E-08 |
| 724 | cg24735489 | CDSN    | -0.28 | 9.69E-20 |
| 725 | cg08424423 | CDSN    | -0.34 | 1.41E-18 |
| 726 | cg02055963 | CDX2    | 0.19  | 9.92E-08 |
| 727 | cg01424107 | CDX2    | 0.12  | 2.99E-05 |
| 728 | cg14831798 | CDYL    | -0.10 | 3.68E-06 |
| 729 | cg09600520 | CDYL    | -0.14 | 1.48E-07 |
| 730 | cg20657383 | CEACAM1 | -0.12 | 2.64E-07 |
| 731 | cg23181133 | CEACAM3 | -0.10 | 2.55E-11 |
| 732 | cg10237469 | CEACAM4 | -0.10 | 7.45E-17 |
| 733 | cg21505334 | CEACAM5 | -0.27 | 6.03E-20 |
| 734 | cg21126943 | CEACAM6 | -0.12 | 8.22E-15 |
| 735 | cg26813458 | CEACAM6 | -0.33 | 4.38E-25 |
| 736 | cg19623751 | CEACAM7 | -0.28 | 2.31E-25 |
| 737 | cg07297178 | CEACAM7 | -0.30 | 3.66E-24 |
| 738 | cg06475327 | CEACAM8 | -0.15 | 1.99E-08 |
| 739 | cg02039171 | CEBPE   | -0.10 | 2.30E-11 |
| 740 | cg18137704 | CECR6   | 0.17  | 2.09E-10 |
| 741 | cg06268694 | CELSR1  | 0.38  | 7.05E-18 |
| 742 | cg15879316 | CELSR1  | 0.10  | 1.64E-04 |
| 743 | cg06621358 | CELSR3  | 0.31  | 3.94E-19 |
| 744 | cg09736162 | CELSR3  | 0.20  | 2.41E-05 |
| 745 | cg05052633 | CENTA2  | 0.21  | 2.71E-07 |

|     |            |          |       |          |
|-----|------------|----------|-------|----------|
| 746 | cg04856858 | CENTG2   | 0.20  | 1.74E-09 |
| 747 | cg24768561 | CENTG2   | 0.17  | 7.81E-15 |
| 748 | cg09425611 | CES1     | -0.12 | 4.82E-07 |
| 749 | cg01474260 | CESK1    | -0.15 | 7.81E-12 |
| 750 | cg07443748 | CESK1    | -0.16 | 5.12E-10 |
| 751 | cg26738010 | CETN1    | -0.17 | 7.01E-11 |
| 752 | cg17741572 | CFB      | -0.14 | 3.62E-07 |
| 753 | cg17204100 | CFC1     | -0.30 | 1.41E-17 |
| 754 | cg24974599 | CFH      | 0.11  | 3.45E-09 |
| 755 | cg25509184 | CFTR     | 0.33  | 1.14E-17 |
| 756 | cg07981495 | CGA      | -0.11 | 1.64E-06 |
| 757 | cg00534856 | CGB      | -0.17 | 2.58E-15 |
| 758 | cg20376767 | CGB1     | -0.13 | 1.74E-09 |
| 759 | cg24908058 | CGB5     | -0.22 | 3.08E-20 |
| 760 | cg03192551 | CGI-69   | 0.30  | 5.38E-11 |
| 761 | cg22740783 | CGREF1   | 0.16  | 3.83E-04 |
| 762 | cg23410627 | CH25H    | 0.21  | 2.57E-08 |
| 763 | cg06818777 | CHAD     | 0.18  | 3.44E-12 |
| 764 | cg06958829 | CHAD     | 0.18  | 8.26E-12 |
| 765 | cg13854874 | CHAF1B   | 0.15  | 5.40E-05 |
| 766 | cg08080029 | CHD5     | 0.18  | 9.06E-06 |
| 767 | cg00282347 | CHD5     | 0.15  | 8.51E-06 |
| 768 | cg00338702 | CHFR     | 0.10  | 1.83E-03 |
| 769 | cg12422450 | CHGA     | 0.19  | 4.72E-07 |
| 770 | cg15379858 | ChGn     | -0.22 | 2.50E-11 |
| 771 | cg10045881 | CHI3L2   | -0.18 | 4.07E-11 |
| 772 | cg21472642 | CHN2     | -0.11 | 4.75E-06 |
| 773 | cg24130010 | CHODL    | 0.15  | 7.29E-06 |
| 774 | cg06319346 | CHRFAM7A | -0.26 | 2.29E-22 |
| 775 | cg13530039 | CHRM1    | -0.18 | 1.12E-13 |
| 776 | cg04953015 | CHRNA2   | -0.10 | 1.60E-04 |
| 777 | cg00318573 | CHRNA4   | 0.14  | 1.94E-09 |
| 778 | cg08912400 | CHRNA4   | 0.12  | 6.29E-04 |
| 779 | cg00367281 | CHRN3    | -0.12 | 3.78E-07 |
| 780 | cg27554782 | CHRN4    | 0.18  | 2.16E-07 |
| 781 | cg11695684 | CHRNA4   | -0.10 | 6.33E-06 |
| 782 | cg03853987 | CHST10   | 0.34  | 3.17E-14 |
| 783 | cg00995327 | CHST2    | 0.24  | 1.01E-09 |
| 784 | cg19731268 | CHST3    | 0.23  | 1.68E-08 |
| 785 | cg00840403 | CHST4    | 0.15  | 3.76E-12 |
| 786 | cg12827555 | CHX10    | 0.11  | 4.95E-04 |
| 787 | cg26112639 | CIAS1    | -0.18 | 1.54E-14 |
| 788 | cg21991396 | CIAS1    | -0.29 | 8.44E-27 |
| 789 | cg10313673 | CILP2    | 0.28  | 3.21E-09 |
| 790 | cg10669058 | CILP2    | 0.17  | 1.87E-06 |
| 791 | cg13316424 | CIZ1     | -0.11 | 4.00E-08 |
| 792 | cg05786809 | CKB      | 0.19  | 8.28E-06 |
| 793 | cg20444256 | CKM      | -0.24 | 3.99E-22 |
| 794 | cg00410921 | CKMT1B   | -0.11 | 3.24E-08 |
| 795 | cg10978355 | CKMT2    | 0.34  | 1.39E-16 |



|     |            |          |       |          |
|-----|------------|----------|-------|----------|
| 796 | cg07173760 | CLC      | -0.14 | 9.19E-12 |
| 797 | cg13693652 | CLCA2    | -0.19 | 4.23E-17 |
| 798 | cg21660130 | CLCNKB   | -0.13 | 6.36E-09 |
| 799 | cg08418978 | CLDN10   | -0.16 | 2.64E-08 |
| 800 | cg20449692 | CLDN11   | 0.29  | 1.10E-08 |
| 801 | cg11099899 | CLDN14   | -0.11 | 5.20E-06 |
| 802 | cg02512860 | CLDN15   | -0.21 | 3.73E-08 |
| 803 | cg13792279 | CLDN17   | -0.30 | 6.38E-24 |
| 804 | cg10784090 | CLDN18   | -0.12 | 5.71E-07 |
| 805 | cg17298704 | CLDN18   | -0.19 | 1.23E-10 |
| 806 | cg15544036 | CLDN4    | 0.13  | 2.26E-04 |
| 807 | cg07384961 | CLDN6    | 0.28  | 3.00E-12 |
| 808 | cg10282491 | CLDN9    | 0.16  | 3.45E-07 |
| 809 | cg11905488 | CLEC12A  | -0.11 | 5.65E-08 |
| 810 | cg20645058 | CLEC12B  | -0.21 | 1.21E-11 |
| 811 | cg14473145 | CLEC14A  | 0.21  | 6.82E-14 |
| 812 | cg13354523 | CLEC1A   | -0.12 | 1.29E-05 |
| 813 | cg21048669 | CLEC3A   | -0.12 | 8.33E-08 |
| 814 | cg21057494 | CLEC3B   | -0.18 | 2.11E-12 |
| 815 | cg22194129 | CLEC4C   | -0.12 | 2.19E-07 |
| 816 | cg09546307 | CLEC4D   | -0.24 | 1.83E-16 |
| 817 | cg14162076 | CLEC4D   | -0.34 | 9.87E-26 |
| 818 | cg22984277 | CLEC4E   | -0.11 | 3.73E-16 |
| 819 | cg18199266 | CLEC4F   | -0.12 | 7.23E-08 |
| 820 | cg21148892 | CLEC4F   | -0.28 | 2.88E-15 |
| 821 | cg04816348 | CLEC4G   | -0.14 | 1.40E-06 |
| 822 | cg16626670 | CLEC4G   | -0.21 | 1.05E-12 |
| 823 | cg21372914 | CLEC4M   | -0.19 | 2.90E-11 |
| 824 | cg18463686 | CLEC5A   | -0.17 | 7.79E-14 |
| 825 | cg20098659 | CLEC9A   | -0.13 | 3.15E-08 |
| 826 | cg17469479 | CLEC9A   | -0.16 | 7.38E-09 |
| 827 | cg06432655 | CLIPR-59 | 0.29  | 2.80E-21 |
| 828 | cg25107791 | CLPS     | -0.24 | 4.03E-17 |
| 829 | cg07251788 | CLTCL1   | -0.18 | 1.08E-08 |
| 830 | cg06933965 | CMKLR1   | -0.12 | 4.19E-06 |
| 831 | cg00298951 | CMKLR1   | -0.27 | 1.69E-17 |
| 832 | cg01683883 | CMTM2    | 0.34  | 1.64E-16 |
| 833 | cg23297477 | CMTM3    | 0.30  | 6.19E-10 |
| 834 | cg00174500 | CMTM5    | -0.19 | 7.80E-11 |
| 835 | cg10560038 | CMTM5    | -0.22 | 1.40E-13 |
| 836 | cg01617750 | CMTM8    | -0.11 | 2.66E-04 |
| 837 | cg11500727 | CNFN     | -0.13 | 4.22E-07 |
| 838 | cg19000186 | CNGA1    | -0.17 | 4.57E-11 |
| 839 | cg15954792 | CNGA3    | -0.19 | 2.39E-12 |
| 840 | cg22241124 | CNGA3    | -0.23 | 1.60E-13 |
| 841 | cg16480209 | CNGB1    | -0.15 | 9.38E-09 |
| 842 | cg00290506 | CNIH3    | 0.30  | 2.43E-11 |
| 843 | cg01968793 | CNNM1    | 0.13  | 1.46E-04 |
| 844 | cg23276695 | CNR1     | -0.14 | 2.47E-12 |
| 845 | cg03732545 | CNTN2    | 0.16  | 8.52E-14 |

|     |            |         |       |          |
|-----|------------|---------|-------|----------|
| 846 | cg10503138 | CNTN4   | -0.24 | 4.11E-23 |
| 847 | cg05209917 | CNTN6   | -0.15 | 2.83E-10 |
| 848 | cg07028533 | CNTNAP2 | 0.18  | 3.06E-08 |
| 849 | cg16254309 | CNTNAP2 | 0.16  | 1.51E-05 |
| 850 | cg25383242 | CNTNAP4 | -0.19 | 2.70E-13 |
| 851 | cg06793062 | CNTNAP4 | -0.22 | 1.32E-10 |
| 852 | cg17031727 | COG2    | 0.19  | 4.14E-10 |
| 853 | cg10143146 | COL11A2 | 0.24  | 1.70E-10 |
| 854 | cg08009622 | COL12A1 | 0.12  | 1.04E-05 |
| 855 | cg16907566 | COL14A1 | 0.23  | 1.93E-14 |
| 856 | cg20503329 | COL15A1 | -0.14 | 1.25E-06 |
| 857 | cg20546002 | COL23A1 | 0.26  | 1.55E-11 |
| 858 | cg10730712 | COL23A1 | 0.21  | 1.25E-07 |
| 859 | cg01291404 | COL2A1  | 0.22  | 1.84E-08 |
| 860 | cg21513553 | COL6A2  | 0.12  | 1.59E-03 |
| 861 | cg00573606 | COL6A3  | -0.20 | 2.44E-11 |
| 862 | cg11846236 | COL7A1  | 0.35  | 1.29E-18 |
| 863 | cg18931815 | COL8A2  | -0.12 | 6.87E-04 |
| 864 | cg14579051 | COL9A1  | -0.14 | 2.04E-08 |
| 865 | cg21789545 | COL9A1  | -0.21 | 2.26E-19 |
| 866 | cg05755779 | COLEC10 | -0.16 | 1.06E-06 |
| 867 | cg09949775 | COMP    | 0.18  | 2.67E-05 |
| 868 | cg15926585 | COMT    | -0.17 | 5.50E-08 |
| 869 | cg24831427 | COQ3    | -0.11 | 9.16E-06 |
| 870 | cg20015855 | CORO2B  | -0.10 | 2.69E-05 |
| 871 | cg08290628 | CORO2B  | -0.16 | 1.17E-12 |
| 872 | cg13623690 | COTL1   | 0.23  | 3.23E-09 |
| 873 | cg22677246 | COTL1   | 0.10  | 4.73E-06 |
| 874 | cg09027725 | COX4I2  | -0.15 | 9.32E-12 |
| 875 | cg24335895 | COX7A1  | 0.11  | 1.35E-08 |
| 876 | cg27651218 | COX8C   | -0.10 | 6.91E-10 |
| 877 | cg14761227 | CPA1    | -0.23 | 1.61E-13 |
| 878 | cg22213042 | CPA2    | -0.11 | 1.14E-05 |
| 879 | cg24060938 | CPA2    | -0.15 | 1.14E-08 |
| 880 | cg24290574 | CPA3    | -0.11 | 9.29E-07 |
| 881 | cg13424229 | CPA3    | -0.14 | 3.18E-07 |
| 882 | cg00845900 | CPA4    | -0.20 | 3.70E-12 |
| 883 | cg02855426 | CPA5    | -0.11 | 5.28E-16 |
| 884 | cg21750887 | CPA6    | -0.21 | 1.73E-09 |
| 885 | cg19885761 | CPLX2   | 0.19  | 9.08E-07 |
| 886 | cg22776578 | CPLX2   | 0.10  | 2.09E-04 |
| 887 | cg16673198 | CPNE4   | -0.21 | 4.63E-17 |
| 888 | cg21716693 | CPNE5   | 0.10  | 1.77E-03 |
| 889 | cg16444968 | CPNE7   | 0.25  | 2.22E-10 |
| 890 | cg07690018 | CPNE7   | 0.12  | 2.13E-04 |
| 891 | cg16191009 | CPNE9   | 0.17  | 1.31E-19 |
| 892 | cg20051033 | CPNE9   | 0.16  | 1.13E-06 |
| 893 | cg03731898 | CPO     | -0.16 | 1.44E-09 |
| 894 | cg06194186 | CPO     | -0.23 | 1.11E-19 |
| 895 | cg19596755 | CPT1A   | 0.18  | 7.67E-06 |

|     |            |          |       |          |
|-----|------------|----------|-------|----------|
| 896 | cg00983520 | CPT1B    | 0.11  | 1.57E-03 |
| 897 | cg21604803 | CPT1C    | 0.25  | 1.99E-12 |
| 898 | cg14726637 | CR1      | 0.22  | 3.01E-11 |
| 899 | cg11200929 | CRABP1   | 0.23  | 2.33E-10 |
| 900 | cg17133183 | CRABP1   | 0.12  | 3.19E-05 |
| 901 | cg23337754 | CRABP1   | 0.12  | 4.18E-05 |
| 902 | cg03258472 | CRB3     | 0.24  | 2.35E-17 |
| 903 | cg20329958 | CRH      | 0.13  | 2.62E-07 |
| 904 | cg08929103 | CRHR1    | -0.21 | 6.39E-11 |
| 905 | cg04922810 | CRHR2    | 0.24  | 6.47E-11 |
| 906 | cg14896516 | CRHR2    | 0.22  | 8.12E-08 |
| 907 | cg02000005 | CRIP1    | 0.15  | 4.45E-04 |
| 908 | cg03451296 | CRIP2    | 0.17  | 1.78E-04 |
| 909 | cg01410472 | CRISPLD1 | 0.20  | 1.56E-09 |
| 910 | cg23606079 | CRISPLD2 | 0.12  | 4.01E-06 |
| 911 | cg07207789 | CRISPLD2 | -0.17 | 3.69E-11 |
| 912 | cg22680204 | CRMP1    | 0.33  | 5.06E-23 |
| 913 | cg03544320 | CRMP1    | 0.29  | 3.07E-14 |
| 914 | cg16713808 | CRNN     | -0.25 | 5.62E-12 |
| 915 | cg19370451 | CRNN     | -0.33 | 1.41E-22 |
| 916 | cg10977115 | CRTAM    | -0.12 | 5.87E-10 |
| 917 | cg22512531 | CRTAM    | -0.13 | 1.95E-08 |
| 918 | cg22386774 | CRYGA    | -0.18 | 4.03E-11 |
| 919 | cg12073779 | CRYGD    | 0.12  | 2.10E-04 |
| 920 | cg04569804 | CSF1R    | -0.10 | 2.81E-05 |
| 921 | cg02196805 | CSF2     | -0.12 | 1.06E-09 |
| 922 | cg13259290 | CSF2     | -0.13 | 2.90E-12 |
| 923 | cg21209356 | CSF2RB   | -0.14 | 1.91E-05 |
| 924 | cg21432842 | CSF3     | -0.16 | 4.40E-09 |
| 925 | cg09088576 | CSF3R    | 0.14  | 7.75E-09 |
| 926 | cg11880211 | CSH1     | -0.16 | 2.22E-15 |
| 927 | cg24498554 | CSH1     | -0.23 | 1.11E-15 |
| 928 | cg27178345 | CSH2     | -0.14 | 1.21E-14 |
| 929 | cg09585781 | CSH2     | -0.18 | 1.32E-17 |
| 930 | cg01668383 | CSNK1A1L | -0.23 | 1.12E-14 |
| 931 | cg25306170 | CSNK1A1L | -0.27 | 1.80E-19 |
| 932 | cg06952310 | CSPG3    | -0.22 | 1.35E-18 |
| 933 | cg13118849 | CSPG3    | -0.35 | 4.91E-22 |
| 934 | cg15988232 | CSPG5    | 0.10  | 1.22E-03 |
| 935 | cg19216731 | CSRP3    | -0.20 | 8.90E-21 |
| 936 | cg14704941 | CSRP3    | -0.28 | 4.91E-21 |
| 937 | cg23660082 | CST1     | -0.13 | 8.72E-14 |
| 938 | cg08430598 | CST1     | -0.30 | 4.43E-18 |
| 939 | cg17928268 | CST11    | -0.24 | 3.16E-23 |
| 940 | cg06489008 | CST11    | -0.25 | 4.10E-17 |
| 941 | cg01237132 | CST2     | -0.12 | 3.65E-12 |
| 942 | cg10938286 | CST2     | -0.37 | 1.53E-22 |
| 943 | cg25965576 | CST4     | -0.10 | 2.15E-07 |
| 944 | cg24875415 | CST4     | -0.32 | 1.04E-17 |
| 945 | cg02882813 | CST5     | -0.26 | 3.17E-15 |

|     |            |         |       |          |
|-----|------------|---------|-------|----------|
| 946 | cg27655855 | CST9L   | -0.16 | 2.25E-09 |
| 947 | cg15210427 | CST9L   | -0.21 | 9.37E-10 |
| 948 | cg14540150 | CTBP2   | 0.15  | 9.99E-06 |
| 949 | cg04233664 | CTBP2   | 0.10  | 1.43E-03 |
| 950 | cg26952662 | CTHRC1  | 0.36  | 3.71E-13 |
| 951 | cg08460026 | CTLA4   | -0.12 | 1.29E-07 |
| 952 | cg15043057 | CTPS    | 0.32  | 2.32E-19 |
| 953 | cg21686987 | CTRB1   | -0.13 | 1.74E-12 |
| 954 | cg23064554 | CTRC    | -0.11 | 5.96E-09 |
| 955 | cg21478437 | CTSE    | -0.12 | 5.72E-09 |
| 956 | cg24355048 | CTSG    | -0.17 | 9.49E-19 |
| 957 | cg24777950 | CTSG    | -0.20 | 2.20E-10 |
| 958 | cg13234643 | CTSL2   | 0.19  | 5.33E-06 |
| 959 | cg02936872 | CTSL2   | 0.19  | 5.56E-06 |
| 960 | cg01623438 | CTSZ    | 0.11  | 6.58E-11 |
| 961 | cg27603796 | CTTNBP2 | 0.20  | 2.83E-10 |
| 962 | cg15777781 | CUGBP2  | -0.18 | 3.47E-10 |
| 963 | cg00168942 | CX40.1  | -0.20 | 4.41E-13 |
| 964 | cg23900225 | CX40.1  | -0.23 | 2.99E-14 |
| 965 | cg08947964 | CX62    | -0.16 | 4.80E-09 |
| 966 | cg00744433 | CXADR   | -0.11 | 2.65E-06 |
| 967 | cg00499822 | CXCL12  | -0.13 | 1.23E-03 |
| 968 | cg18618334 | CXCL12  | -0.14 | 6.60E-04 |
| 969 | cg10088985 | CXCL5   | 0.15  | 5.21E-07 |
| 970 | cg22670329 | CXCL6   | 0.14  | 1.14E-07 |
| 971 | cg21859434 | CXCR4   | 0.12  | 1.12E-05 |
| 972 | cg14204735 | CYB561  | 0.19  | 1.38E-07 |
| 973 | cg03826976 | CYB5R2  | 0.30  | 3.13E-25 |
| 974 | cg06885524 | CYBRD1  | 0.13  | 1.20E-04 |
| 975 | cg17040807 | CYGB    | 0.17  | 4.58E-12 |
| 976 | cg21301440 | CYGB    | 0.15  | 3.84E-07 |
| 977 | cg09120035 | CYP11B1 | -0.45 | 8.68E-36 |
| 978 | cg10500909 | CYP11B2 | -0.20 | 1.96E-16 |
| 979 | cg09201719 | CYP17A1 | -0.11 | 1.45E-05 |
| 980 | cg14694011 | CYP19A1 | -0.10 | 1.96E-07 |
| 981 | cg04968473 | CYP1A2  | 0.13  | 4.55E-09 |
| 982 | cg09207718 | CYP1A2  | -0.19 | 2.38E-11 |
| 983 | cg18956481 | CYP24A1 | 0.31  | 3.79E-16 |
| 984 | cg04884908 | CYP26B1 | 0.13  | 2.50E-04 |
| 985 | cg20322977 | CYP26C1 | 0.17  | 1.55E-11 |
| 986 | cg00436603 | CYP2E1  | -0.10 | 2.51E-05 |
| 987 | cg13364756 | CYP3A43 | -0.15 | 1.78E-08 |
| 988 | cg16689634 | CYP4X1  | 0.32  | 3.67E-19 |
| 989 | cg13158571 | CYP4X1  | 0.31  | 8.92E-18 |
| 990 | cg10751811 | CYP4Z1  | -0.12 | 1.15E-10 |
| 991 | cg14404298 | CYP8B1  | -0.11 | 7.00E-09 |
| 992 | cg21979032 | CYP8B1  | -0.16 | 3.40E-08 |
| 993 | cg00512031 | CYTL1   | -0.28 | 7.67E-19 |
| 994 | cg14837165 | D4ST1   | 0.29  | 1.43E-08 |
| 995 | cg06710648 | DAB1    | 0.13  | 5.15E-07 |

|      |            |          |       |          |
|------|------------|----------|-------|----------|
| 996  | cg00848728 | DAB1     | 0.11  | 2.60E-04 |
| 997  | cg05684891 | DAB2IP   | 0.48  | 1.49E-33 |
| 998  | cg07981910 | DAB2IP   | 0.14  | 9.42E-11 |
| 999  | cg13060154 | DAB2IP   | 0.13  | 3.09E-14 |
| 1000 | cg15686608 | DAB2IP   | 0.12  | 1.01E-11 |
| 1001 | cg08128768 | DAB2IP   | 0.12  | 6.31E-08 |
| 1002 | cg27650175 | DAB2IP   | 0.11  | 7.19E-10 |
| 1003 | cg07817783 | DAP      | 0.18  | 7.51E-07 |
| 1004 | cg23165541 | DAPK2    | -0.18 | 8.24E-11 |
| 1005 | cg23507131 | DARC     | -0.21 | 3.52E-19 |
| 1006 | cg18552413 | DARC     | -0.23 | 2.80E-13 |
| 1007 | cg25020204 | DBH      | -0.18 | 1.38E-11 |
| 1008 | cg07824742 | DBH      | -0.19 | 1.76E-10 |
| 1009 | cg22605063 | DBN1     | 0.24  | 7.69E-09 |
| 1010 | cg23983884 | DBN1     | 0.14  | 5.19E-10 |
| 1011 | cg17470143 | DCAMKL1  | -0.13 | 1.22E-09 |
| 1012 | cg02624705 | DCC      | 0.11  | 1.81E-04 |
| 1013 | cg18572014 | DCC      | -0.14 | 3.00E-29 |
| 1014 | cg13396068 | DCD      | -0.19 | 1.12E-11 |
| 1015 | cg25372195 | DCD      | -0.28 | 7.83E-20 |
| 1016 | cg16306115 | DCDC2    | 0.43  | 3.82E-18 |
| 1017 | cg04515001 | DCDC2    | 0.36  | 3.83E-15 |
| 1018 | cg04517429 | DCHS2    | 0.11  | 1.09E-05 |
| 1019 | cg07903860 | DCLRE1C  | 0.12  | 2.43E-03 |
| 1020 | cg06785429 | DCUN1D1  | 0.12  | 2.24E-08 |
| 1021 | cg18055007 | DDAH2    | 0.17  | 1.48E-07 |
| 1022 | cg11155265 | DDEF1    | 0.15  | 1.57E-08 |
| 1023 | cg22740835 | DDR2     | 0.14  | 8.91E-17 |
| 1024 | cg17188169 | DDX43    | -0.15 | 4.38E-06 |
| 1025 | cg14757492 | DDX49    | -0.23 | 4.05E-16 |
| 1026 | cg04761824 | DEC1     | -0.15 | 2.12E-14 |
| 1027 | cg07294541 | DEF6     | 0.13  | 1.98E-03 |
| 1028 | cg14960043 | DEF6     | 0.12  | 2.31E-03 |
| 1029 | cg10758292 | DEFA1    | -0.19 | 1.46E-14 |
| 1030 | cg17267907 | DEFA1    | -0.25 | 1.80E-19 |
| 1031 | cg22218909 | DEFA3    | -0.25 | 1.40E-17 |
| 1032 | cg19304352 | DEFA4    | -0.12 | 2.56E-07 |
| 1033 | cg15481539 | DEFA5    | -0.25 | 5.57E-15 |
| 1034 | cg27212977 | DEFA6    | -0.19 | 1.87E-13 |
| 1035 | cg25214366 | DEFB103A | -0.20 | 1.83E-13 |
| 1036 | cg14120879 | DEFB105A | -0.19 | 3.49E-14 |
| 1037 | cg08753553 | DEFB106A | -0.14 | 1.71E-10 |
| 1038 | cg05810550 | DEFB106A | -0.16 | 1.08E-14 |
| 1039 | cg03014957 | DEFB118  | -0.18 | 1.74E-19 |
| 1040 | cg20312687 | DEFB118  | -0.21 | 2.77E-20 |
| 1041 | cg18462653 | DEFB119  | -0.17 | 8.21E-16 |
| 1042 | cg26063872 | DEFB123  | -0.24 | 3.87E-18 |
| 1043 | cg19241311 | DEFB123  | -0.29 | 6.10E-19 |
| 1044 | cg08088390 | DEFB125  | -0.15 | 6.12E-15 |
| 1045 | cg00466436 | DEFB126  | -0.13 | 1.65E-12 |

|      |            |               |       |          |
|------|------------|---------------|-------|----------|
| 1046 | cg20305726 | DEFB126       | -0.22 | 5.05E-20 |
| 1047 | cg00769470 | DEFB129       | -0.15 | 4.36E-11 |
| 1048 | cg18239253 | DEFB32        | -0.14 | 2.71E-08 |
| 1049 | cg22478614 | DEFB4         | -0.23 | 4.38E-25 |
| 1050 | cg02658251 | DEFB4         | -0.27 | 2.84E-22 |
| 1051 | cg23213217 | DEGS1         | -0.17 | 4.29E-07 |
| 1052 | cg08307816 | DEGS2         | 0.33  | 1.67E-14 |
| 1053 | cg00890257 | DEGS2         | 0.31  | 4.88E-11 |
| 1054 | cg24641737 | DENND2D       | 0.16  | 2.78E-08 |
| 1055 | cg00619207 | DENND2D       | 0.11  | 3.96E-06 |
| 1056 | cg24473633 | DENND3        | 0.23  | 3.66E-09 |
| 1057 | cg26259363 | DES           | -0.14 | 6.63E-10 |
| 1058 | cg01344452 | DGKE          | 0.37  | 1.07E-10 |
| 1059 | cg06277657 | DGKI          | 0.35  | 9.63E-17 |
| 1060 | cg06577005 | DHDDS         | 0.17  | 4.81E-09 |
| 1061 | cg15974053 | DHRS10        | -0.14 | 6.86E-06 |
| 1062 | cg26588422 | DHX33         | 0.10  | 5.72E-05 |
| 1063 | cg00217795 | DIO2          | -0.11 | 1.03E-05 |
| 1064 | cg04623955 | DIO3          | 0.28  | 3.92E-12 |
| 1065 | cg21808053 | DIRAS3        | -0.21 | 5.09E-11 |
| 1066 | cg10942056 | DISP1         | -0.12 | 1.30E-05 |
| 1067 | cg06595693 | DISP2         | 0.18  | 4.92E-08 |
| 1068 | cg17983307 | DKFZp434B1231 | -0.18 | 2.17E-14 |
| 1069 | cg17886204 | DKFZp434I1020 | 0.38  | 8.27E-22 |
| 1070 | cg19394737 | DKFZp434O0527 | -0.12 | 2.05E-08 |
| 1071 | cg13379763 | DKFZp434O0527 | -0.21 | 4.96E-15 |
| 1072 | cg17757055 | DKFZP564O0823 | 0.13  | 1.15E-04 |
| 1073 | cg24890043 | DKFZP566N034  | 0.22  | 1.33E-06 |
| 1074 | cg13216057 | DKK3          | 0.21  | 1.03E-07 |
| 1075 | cg21589115 | DKKL1         | 0.10  | 1.19E-02 |
| 1076 | cg23881725 | DLEC1         | 0.30  | 2.90E-17 |
| 1077 | cg00807586 | DLEC1         | 0.20  | 5.78E-08 |
| 1078 | cg16986720 | DLG2          | -0.23 | 2.19E-15 |
| 1079 | cg16128363 | DLGAP1        | -0.25 | 2.20E-12 |
| 1080 | cg09276978 | DLGAP4        | -0.29 | 1.04E-18 |
| 1081 | cg17412258 | DLK1          | 0.18  | 3.44E-07 |
| 1082 | cg16652259 | DLX1          | 0.24  | 2.59E-09 |
| 1083 | cg15236866 | DLX1          | 0.11  | 1.50E-06 |
| 1084 | cg03657766 | DLX2          | 0.18  | 8.26E-07 |
| 1085 | cg01169726 | DLX5          | 0.37  | 1.07E-20 |
| 1086 | cg00503840 | DLX5          | 0.36  | 2.10E-30 |
| 1087 | cg27016494 | DLX5          | 0.35  | 2.25E-20 |
| 1088 | cg20080624 | DLX5          | 0.34  | 5.79E-16 |
| 1089 | cg13462129 | DLX5          | 0.31  | 1.65E-16 |
| 1090 | cg18873386 | DLX5          | 0.30  | 7.35E-19 |
| 1091 | cg11500797 | DLX5          | 0.29  | 1.98E-21 |
| 1092 | cg16924616 | DLX5          | 0.18  | 1.53E-05 |
| 1093 | cg12041387 | DLX5          | 0.13  | 8.12E-08 |
| 1094 | cg06911084 | DLX5          | 0.13  | 6.68E-05 |
| 1095 | cg00096922 | DLX5          | 0.12  | 1.27E-06 |

|      |            |          |       |          |
|------|------------|----------|-------|----------|
| 1096 | cg13344740 | DLX5     | 0.11  | 9.03E-05 |
| 1097 | cg20120491 | DMC1     | 0.11  | 2.15E-05 |
| 1098 | cg13191049 | DMN      | 0.34  | 3.03E-10 |
| 1099 | cg05881135 | DMN      | 0.19  | 4.45E-06 |
| 1100 | cg11530960 | DMRT2    | 0.13  | 1.59E-06 |
| 1101 | cg25957124 | DNAH3    | 0.21  | 2.48E-11 |
| 1102 | cg03503295 | DNAH5    | -0.19 | 1.74E-12 |
| 1103 | cg06799664 | DNAHL1   | -0.26 | 2.44E-17 |
| 1104 | cg23753610 | DNAHL1   | -0.36 | 2.92E-21 |
| 1105 | cg23579062 | DNAI1    | 0.15  | 1.40E-17 |
| 1106 | cg08578641 | DNAI1    | 0.15  | 5.07E-09 |
| 1107 | cg11856697 | DNAI2    | -0.18 | 1.43E-13 |
| 1108 | cg23366752 | DNAJA4   | -0.11 | 5.00E-07 |
| 1109 | cg07061145 | DNAJA4   | -0.16 | 2.29E-13 |
| 1110 | cg15712267 | DNAJB1   | -0.11 | 2.42E-04 |
| 1111 | cg11695266 | DNAJB6   | 0.16  | 3.09E-06 |
| 1112 | cg16953612 | DNAJB8   | -0.20 | 2.18E-12 |
| 1113 | cg03022541 | DNAJB8   | -0.27 | 3.60E-21 |
| 1114 | cg02067021 | DNAJC5B  | -0.11 | 3.40E-04 |
| 1115 | cg13760253 | DNAJC5B  | -0.17 | 2.70E-11 |
| 1116 | cg12619509 | DNASE1L2 | 0.16  | 3.95E-05 |
| 1117 | cg23391785 | DNM3     | 0.54  | 1.51E-32 |
| 1118 | cg21629895 | DNMT3A   | -0.13 | 6.50E-09 |
| 1119 | cg24949488 | DNTT     | -0.26 | 8.82E-24 |
| 1120 | cg22807700 | DNTTIP2  | -0.16 | 4.64E-09 |
| 1121 | cg21233722 | DOCK2    | 0.22  | 4.95E-09 |
| 1122 | cg26117023 | DOK1     | 0.45  | 2.56E-22 |
| 1123 | cg20965815 | DPCR1    | -0.13 | 3.16E-09 |
| 1124 | cg04645843 | DPCR1    | -0.24 | 4.49E-19 |
| 1125 | cg10922280 | DPEP2    | -0.10 | 7.95E-07 |
| 1126 | cg04774694 | DPEP2    | -0.13 | 2.40E-24 |
| 1127 | cg11516377 | DPH1     | 0.14  | 3.58E-06 |
| 1128 | cg26738880 | DPP6     | -0.14 | 3.90E-12 |
| 1129 | cg06872381 | DPPA3    | -0.11 | 1.70E-08 |
| 1130 | cg08284151 | DPPA3    | -0.12 | 2.57E-10 |
| 1131 | cg20774846 | DPYS     | -0.11 | 1.45E-13 |
| 1132 | cg07295678 | DPYSL4   | 0.23  | 2.02E-08 |
| 1133 | cg12109455 | DPYSL4   | 0.16  | 7.40E-06 |
| 1134 | cg16112129 | DRD1     | 0.24  | 6.40E-08 |
| 1135 | cg17307280 | DRD1     | 0.13  | 1.12E-04 |
| 1136 | cg21965997 | DRD1IP   | 0.21  | 3.40E-08 |
| 1137 | cg12758687 | DRD2     | 0.26  | 5.28E-13 |
| 1138 | cg06825142 | DRD4     | 0.31  | 4.78E-09 |
| 1139 | cg09936561 | DRD5     | 0.28  | 7.33E-16 |
| 1140 | cg21279601 | DRD5     | 0.25  | 1.47E-11 |
| 1141 | cg04180953 | DSC1     | -0.15 | 1.06E-07 |
| 1142 | cg18356799 | DSC1     | -0.16 | 6.47E-10 |
| 1143 | cg11832722 | DSC3     | 0.26  | 2.24E-09 |
| 1144 | cg15439862 | DSC3     | 0.23  | 2.96E-09 |
| 1145 | cg19703610 | DSCAML1  | 0.22  | 1.74E-08 |

|      |            |         |       |          |
|------|------------|---------|-------|----------|
| 1146 | cg00544557 | DSCR10  | -0.17 | 6.75E-11 |
| 1147 | cg13460409 | DSCR6   | 0.14  | 9.17E-08 |
| 1148 | cg01262913 | DSCR9   | 0.16  | 4.72E-07 |
| 1149 | cg02668581 | DSU     | 0.39  | 8.43E-14 |
| 1150 | cg12620499 | DSU     | 0.22  | 1.70E-06 |
| 1151 | cg18719571 | DTNBP1  | -0.17 | 5.53E-09 |
| 1152 | cg05732530 | DUSP2   | 0.10  | 2.29E-03 |
| 1153 | cg01148741 | DUSP2   | 0.10  | 2.57E-03 |
| 1154 | cg18070061 | DUSP4   | 0.33  | 1.85E-12 |
| 1155 | cg13983578 | DUSP4   | 0.16  | 3.81E-06 |
| 1156 | cg25751295 | DUSP4   | 0.12  | 6.25E-05 |
| 1157 | cg18396533 | DYDC1   | 0.14  | 3.12E-16 |
| 1158 | cg10281478 | DYNC1I1 | 0.11  | 1.14E-04 |
| 1159 | cg06270401 | DYRK4   | -0.12 | 6.01E-07 |
| 1160 | cg09418321 | DYRK4   | -0.13 | 1.11E-09 |
| 1161 | cg08433095 | DYX1C1  | -0.18 | 1.83E-12 |
| 1162 | cg16593081 | DYX1C1  | -0.18 | 3.28E-11 |
| 1163 | cg04101379 | DZIP1   | 0.12  | 2.35E-04 |
| 1164 | cg00756058 | DZIP1   | 0.11  | 1.50E-03 |
| 1165 | cg05056120 | EBF     | 0.29  | 2.67E-17 |
| 1166 | cg16592658 | EBI3    | -0.19 | 2.37E-15 |
| 1167 | cg06819200 | ECE1    | 0.35  | 1.75E-11 |
| 1168 | cg25431974 | ECEL1   | 0.14  | 1.49E-12 |
| 1169 | cg02932167 | ECEL1   | 0.10  | 1.45E-08 |
| 1170 | cg24428042 | ECHDC3  | 0.13  | 2.87E-03 |
| 1171 | cg10885338 | ECRG4   | 0.10  | 1.90E-04 |
| 1172 | cg10521852 | EDG4    | 0.34  | 2.85E-24 |
| 1173 | cg06501070 | EDG7    | -0.15 | 1.27E-10 |
| 1174 | cg24574111 | EDG7    | -0.16 | 1.03E-09 |
| 1175 | cg27238470 | EDN2    | -0.11 | 1.35E-05 |
| 1176 | cg21163415 | EDN3    | -0.19 | 2.38E-16 |
| 1177 | cg23316360 | EDNRB   | 0.17  | 3.87E-07 |
| 1178 | cg22463915 | EEF1A2  | 0.15  | 2.52E-06 |
| 1179 | cg22836229 | EFCAB1  | 0.32  | 7.75E-13 |
| 1180 | cg11868900 | EFCAB1  | 0.22  | 1.38E-09 |
| 1181 | cg27513764 | EFCAB3  | -0.24 | 4.26E-21 |
| 1182 | cg02899772 | EFCBP2  | 0.12  | 2.07E-02 |
| 1183 | cg20786074 | EFEMP1  | 0.15  | 8.21E-08 |
| 1184 | cg15230273 | EFNA5   | 0.20  | 2.33E-07 |
| 1185 | cg24929737 | EFNB2   | 0.39  | 7.32E-18 |
| 1186 | cg27226949 | EFNB2   | 0.30  | 2.83E-13 |
| 1187 | cg01013324 | EFNB3   | 0.14  | 1.56E-05 |
| 1188 | cg11460029 | EFNB3   | 0.13  | 5.51E-05 |
| 1189 | cg07197059 | EFS     | -0.18 | 6.14E-08 |
| 1190 | cg24818418 | EGF     | -0.14 | 7.66E-11 |
| 1191 | cg13379236 | EGF     | -0.15 | 2.40E-09 |
| 1192 | cg05037688 | EGFL7   | -0.30 | 8.34E-23 |
| 1193 | cg24236938 | EGFL9   | -0.10 | 8.85E-05 |
| 1194 | cg19355190 | EGR2    | 0.17  | 6.82E-06 |
| 1195 | cg25811575 | EGR3    | 0.12  | 4.63E-04 |



|      |            |         |       |          |
|------|------------|---------|-------|----------|
| 1196 | cg18414381 | EHF     | 0.10  | 4.60E-05 |
| 1197 | cg16019273 | EIF2C4  | -0.10 | 5.50E-04 |
| 1198 | cg10541755 | EIF5A2  | 0.30  | 5.21E-11 |
| 1199 | cg26209058 | EIF5A2  | 0.18  | 1.91E-07 |
| 1200 | cg01963696 | ELA2    | -0.15 | 3.55E-09 |
| 1201 | cg25332298 | ELAVL3  | 0.18  | 4.71E-07 |
| 1202 | cg18242139 | ELAVL4  | -0.25 | 6.46E-14 |
| 1203 | cg19439399 | ELOVL4  | 0.16  | 1.57E-06 |
| 1204 | cg13297865 | ELOVL4  | 0.16  | 1.12E-05 |
| 1205 | cg08981777 | ELSPBP1 | -0.12 | 9.14E-12 |
| 1206 | cg27019278 | EMCN    | -0.22 | 3.02E-15 |
| 1207 | cg09009111 | EMILIN2 | 0.29  | 6.94E-11 |
| 1208 | cg14133708 | EMILIN2 | 0.12  | 7.46E-07 |
| 1209 | cg18938204 | EMILIN3 | 0.15  | 9.42E-06 |
| 1210 | cg15746620 | EMR3    | -0.10 | 1.14E-11 |
| 1211 | cg15552238 | EMR3    | -0.16 | 6.56E-24 |
| 1212 | cg21351994 | EMX1    | 0.11  | 1.44E-03 |
| 1213 | cg19358493 | EMX2    | 0.15  | 1.47E-06 |
| 1214 | cg24910675 | ENG     | 0.13  | 8.42E-07 |
| 1215 | cg16112050 | ENOSF1  | -0.10 | 3.02E-03 |
| 1216 | cg04006554 | ENPP5   | 0.13  | 2.03E-05 |
| 1217 | cg08493463 | ENPP6   | -0.11 | 4.81E-06 |
| 1218 | cg17348429 | ENPP7   | -0.14 | 1.31E-07 |
| 1219 | cg26087862 | ENSA    | -0.15 | 4.20E-20 |
| 1220 | cg17018517 | ENTPD2  | 0.20  | 5.07E-09 |
| 1221 | cg17264618 | ENTPD3  | 0.34  | 1.57E-22 |
| 1222 | cg17200465 | ENTPD3  | 0.30  | 8.21E-27 |
| 1223 | cg12858460 | EOMES   | 0.18  | 1.00E-06 |
| 1224 | cg15540820 | EOMES   | 0.13  | 2.96E-05 |
| 1225 | cg14324838 | EPB41L1 | -0.13 | 2.55E-03 |
| 1226 | cg20993403 | EPB41L1 | -0.13 | 4.12E-06 |
| 1227 | cg00027083 | EPB41L3 | 0.14  | 1.58E-03 |
| 1228 | cg15146752 | EPHA2   | 0.11  | 4.06E-03 |
| 1229 | cg18055394 | EPHA3   | -0.12 | 2.52E-12 |
| 1230 | cg03776464 | EPHA4   | 0.25  | 7.27E-10 |
| 1231 | cg18420965 | EPHA5   | 0.10  | 5.53E-04 |
| 1232 | cg08001895 | EPHA7   | 0.16  | 4.54E-08 |
| 1233 | cg00044245 | EPHA7   | 0.11  | 5.22E-08 |
| 1234 | cg16382256 | EPHB3   | 0.13  | 1.17E-05 |
| 1235 | cg02593766 | EPN3    | -0.24 | 1.60E-21 |
| 1236 | cg08575537 | EPO     | -0.13 | 4.54E-08 |
| 1237 | cg24477567 | EPOR    | 0.14  | 9.35E-10 |
| 1238 | cg27105123 | EPS8L1  | -0.12 | 2.99E-14 |
| 1239 | cg00491404 | EPS8L3  | -0.11 | 1.38E-05 |
| 1240 | cg00515905 | EPS8L3  | -0.19 | 5.48E-10 |
| 1241 | cg07115820 | EPX     | -0.16 | 1.68E-09 |
| 1242 | cg02989940 | ERAF    | -0.22 | 2.46E-12 |
| 1243 | cg20637307 | ERBB4   | 0.11  | 8.56E-04 |
| 1244 | cg21349901 | ERVK6   | -0.12 | 6.94E-24 |
| 1245 | cg20451680 | ESM1    | -0.12 | 4.29E-04 |

|      |            |         |       |          |
|------|------------|---------|-------|----------|
| 1246 | cg07233761 | ESM1    | -0.15 | 4.58E-14 |
| 1247 | cg13066963 | ESPN    | 0.22  | 1.71E-10 |
| 1248 | cg00655307 | ESR1    | 0.22  | 3.35E-08 |
| 1249 | cg07671949 | ESR1    | 0.22  | 2.90E-09 |
| 1250 | cg20627916 | ESR1    | 0.17  | 9.94E-09 |
| 1251 | cg11251858 | ESR1    | 0.16  | 8.48E-05 |
| 1252 | cg11059483 | ESR2    | 0.18  | 5.03E-07 |
| 1253 | cg16792632 | ESR2    | 0.14  | 1.22E-05 |
| 1254 | cg26298099 | ESRRB   | -0.23 | 5.85E-13 |
| 1255 | cg07864297 | ESRRB   | -0.24 | 3.53E-18 |
| 1256 | cg04289385 | ETV7    | 0.19  | 3.66E-06 |
| 1257 | cg03278643 | EVC2    | -0.13 | 1.53E-04 |
| 1258 | cg23352695 | EVI2A   | 0.11  | 2.16E-05 |
| 1259 | cg27626299 | EVX1    | 0.31  | 5.07E-15 |
| 1260 | cg18397523 | EVX1    | 0.19  | 2.59E-09 |
| 1261 | cg24176563 | EYA4    | 0.22  | 5.08E-08 |
| 1262 | cg26656135 | EYA4    | 0.20  | 3.44E-07 |
| 1263 | cg21296676 | EYA4    | 0.17  | 5.92E-07 |
| 1264 | cg20286200 | EYA4    | 0.16  | 3.13E-08 |
| 1265 | cg01805282 | EYA4    | 0.14  | 4.41E-04 |
| 1266 | cg20330472 | EYA4    | 0.12  | 2.54E-05 |
| 1267 | cg07327468 | EYA4    | 0.11  | 2.12E-08 |
| 1268 | cg26608199 | F10     | -0.16 | 8.86E-09 |
| 1269 | cg21367957 | F10     | -0.20 | 2.04E-10 |
| 1270 | cg06625767 | F12     | -0.12 | 9.34E-06 |
| 1271 | cg12332316 | F12     | -0.14 | 3.56E-07 |
| 1272 | cg20199333 | F2      | -0.14 | 2.33E-07 |
| 1273 | cg11591325 | F2R     | 0.36  | 6.23E-18 |
| 1274 | cg24573501 | F2RL1   | 0.11  | 4.06E-06 |
| 1275 | cg08241785 | F2RL2   | 0.11  | 6.91E-08 |
| 1276 | cg25256723 | F5      | -0.14 | 2.56E-15 |
| 1277 | cg24269657 | F7      | -0.13 | 3.13E-06 |
| 1278 | cg19910382 | FABP1   | -0.12 | 2.62E-06 |
| 1279 | cg13599007 | FABP6   | -0.13 | 1.46E-05 |
| 1280 | cg22861316 | FABP6   | -0.36 | 4.39E-24 |
| 1281 | cg06781209 | FADS2   | 0.22  | 1.64E-06 |
| 1282 | cg25936385 | FAIM2   | -0.14 | 4.88E-10 |
| 1283 | cg21453309 | FAM101A | -0.17 | 3.26E-08 |
| 1284 | cg23639989 | FAM105A | 0.19  | 6.90E-08 |
| 1285 | cg01794265 | FAM105A | 0.16  | 1.59E-04 |
| 1286 | cg21279865 | FAM106A | -0.10 | 9.42E-13 |
| 1287 | cg12285118 | FAM107B | -0.16 | 1.05E-12 |
| 1288 | cg02876062 | FAM107B | -0.28 | 1.79E-21 |
| 1289 | cg04450876 | FAM112B | -0.26 | 1.69E-16 |
| 1290 | cg20576002 | FAM112B | -0.30 | 2.50E-15 |
| 1291 | cg05596756 | FAM113B | 0.12  | 2.23E-07 |
| 1292 | cg03569637 | FAM113B | 0.11  | 3.02E-07 |
| 1293 | cg15842430 | FAM12B  | -0.19 | 1.93E-11 |
| 1294 | cg04536922 | FAM13A1 | 0.16  | 6.52E-09 |
| 1295 | cg13921352 | FAM19A4 | 0.12  | 1.03E-03 |

|      |            |        |       |          |
|------|------------|--------|-------|----------|
| 1296 | cg07895149 | FAM26B | 0.13  | 1.84E-04 |
| 1297 | cg09155001 | FAM26C | -0.20 | 6.13E-16 |
| 1298 | cg03158400 | FAM3B  | 0.16  | 8.85E-05 |
| 1299 | cg16352283 | FAM46B | 0.28  | 2.52E-16 |
| 1300 | cg06073471 | FAM55C | 0.28  | 4.82E-12 |
| 1301 | cg15646782 | FAM55C | 0.19  | 5.98E-08 |
| 1302 | cg25186143 | FAM57A | 0.13  | 4.46E-04 |
| 1303 | cg13271951 | FAM57B | 0.11  | 1.48E-06 |
| 1304 | cg07078114 | FAM69B | 0.24  | 1.10E-15 |
| 1305 | cg10531372 | FAM71A | -0.11 | 1.65E-11 |
| 1306 | cg14376424 | FAM71B | -0.22 | 3.16E-14 |
| 1307 | cg13338132 | FAM71C | -0.22 | 5.94E-09 |
| 1308 | cg12864581 | FAM77C | -0.22 | 4.56E-14 |
| 1309 | cg12998491 | FAM78A | 0.46  | 9.60E-22 |
| 1310 | cg17936488 | FAM78A | 0.11  | 1.88E-05 |
| 1311 | cg16534233 | FAM80A | 0.18  | 3.32E-05 |
| 1312 | cg13199589 | FAM80A | 0.14  | 7.27E-05 |
| 1313 | cg21771250 | FAM83F | -0.12 | 4.47E-04 |
| 1314 | cg03954858 | FAM83F | -0.23 | 1.07E-16 |
| 1315 | cg16516400 | FAM89A | 0.23  | 1.97E-09 |
| 1316 | cg04443324 | FAT2   | -0.30 | 4.50E-18 |
| 1317 | cg07846167 | FBLIM1 | 0.12  | 2.83E-03 |
| 1318 | cg15143643 | FBLN1  | -0.14 | 2.28E-08 |
| 1319 | cg04337944 | FBLN1  | -0.17 | 2.92E-09 |
| 1320 | cg16604516 | FBLN2  | 0.21  | 6.99E-08 |
| 1321 | cg18671950 | FBN1   | 0.33  | 3.09E-15 |
| 1322 | cg27223047 | FBN2   | 0.24  | 3.24E-11 |
| 1323 | cg25084878 | FBN2   | 0.23  | 7.10E-13 |
| 1324 | cg01934790 | FBXL16 | 0.13  | 8.03E-06 |
| 1325 | cg02699167 | FBXL2  | 0.21  | 8.36E-09 |
| 1326 | cg02630888 | FBXL5  | -0.16 | 4.41E-07 |
| 1327 | cg08820801 | FBXO17 | -0.15 | 6.33E-08 |
| 1328 | cg01680762 | FBXO25 | -0.11 | 5.55E-06 |
| 1329 | cg20723355 | FBXO39 | 0.22  | 7.33E-05 |
| 1330 | cg02613386 | FBXO39 | 0.21  | 5.59E-05 |
| 1331 | cg07125166 | FBXW12 | -0.11 | 3.94E-08 |
| 1332 | cg03112869 | FBXW12 | -0.15 | 7.48E-10 |
| 1333 | cg13853198 | FCER1G | 0.10  | 3.59E-10 |
| 1334 | cg12387247 | FCER2  | -0.12 | 1.07E-06 |
| 1335 | cg03221619 | FCER2  | -0.20 | 1.63E-17 |
| 1336 | cg19103704 | FCGBP  | -0.10 | 1.06E-09 |
| 1337 | cg24030627 | FCGBP  | -0.26 | 8.01E-13 |
| 1338 | cg19464944 | FCGR1A | -0.14 | 1.14E-20 |
| 1339 | cg10904672 | FCGR1A | -0.15 | 1.33E-16 |
| 1340 | cg22202141 | FCGR3A | -0.12 | 9.77E-07 |
| 1341 | cg00974864 | FCGR3B | -0.11 | 3.03E-04 |
| 1342 | cg04567009 | FCGR3B | -0.12 | 1.59E-06 |
| 1343 | cg17357062 | FCN1   | -0.26 | 3.77E-22 |
| 1344 | cg06244417 | FCN1   | -0.29 | 2.34E-22 |
| 1345 | cg26164184 | FCN2   | -0.21 | 4.88E-16 |

|      |            |          |       |          |
|------|------------|----------|-------|----------|
| 1346 | cg11884243 | FCN2     | -0.26 | 3.24E-13 |
| 1347 | cg11921829 | FCRL2    | -0.12 | 2.22E-10 |
| 1348 | cg25259754 | FCRL3    | -0.15 | 2.13E-29 |
| 1349 | cg03329572 | FCRL5    | -0.32 | 1.83E-21 |
| 1350 | cg26015133 | FCRLM2   | -0.18 | 2.37E-17 |
| 1351 | cg27495845 | FCRLM2   | -0.18 | 6.51E-12 |
| 1352 | cg18661868 | FES      | 0.20  | 3.88E-09 |
| 1353 | cg24888049 | FES      | 0.10  | 1.02E-04 |
| 1354 | cg08221207 | FEZ1     | 0.13  | 3.79E-06 |
| 1355 | cg03782727 | FFAR1    | -0.15 | 2.16E-12 |
| 1356 | cg06090864 | FFAR1    | -0.15 | 9.70E-13 |
| 1357 | cg15479752 | FFAR2    | -0.21 | 3.49E-12 |
| 1358 | cg02017155 | FFAR3    | -0.22 | 3.78E-13 |
| 1359 | cg15512851 | FGD2     | -0.11 | 1.01E-08 |
| 1360 | cg19954000 | FGF1     | -0.18 | 3.63E-11 |
| 1361 | cg08816023 | FGF1     | -0.20 | 2.14E-14 |
| 1362 | cg16293656 | FGF17    | 0.20  | 1.09E-08 |
| 1363 | cg15774153 | FGF19    | 0.37  | 6.73E-12 |
| 1364 | cg26096837 | FGF19    | 0.22  | 1.33E-16 |
| 1365 | cg17214107 | FGF2     | 0.12  | 3.06E-08 |
| 1366 | cg24030449 | FGF20    | 0.19  | 8.14E-08 |
| 1367 | cg14605021 | FGF20    | 0.11  | 1.03E-03 |
| 1368 | cg17264470 | FGF21    | -0.18 | 3.15E-08 |
| 1369 | cg22189019 | FGF22    | 0.11  | 2.86E-05 |
| 1370 | cg18384168 | FGF22    | 0.11  | 9.52E-05 |
| 1371 | cg23219570 | FGF23    | -0.11 | 1.07E-07 |
| 1372 | cg21902327 | FGF6     | -0.27 | 5.36E-19 |
| 1373 | cg01731341 | FGF6     | -0.30 | 6.77E-18 |
| 1374 | cg23504246 | FGF7     | -0.13 | 6.44E-08 |
| 1375 | cg16584573 | FGF8     | 0.13  | 1.35E-04 |
| 1376 | cg13929970 | FGFBP1   | -0.15 | 1.33E-10 |
| 1377 | cg08722122 | FGFR1    | -0.15 | 1.65E-06 |
| 1378 | cg01871995 | FGL1     | -0.12 | 5.68E-09 |
| 1379 | cg12271671 | FGL2     | 0.15  | 1.76E-09 |
| 1380 | cg27223827 | FHL2     | -0.11 | 8.47E-05 |
| 1381 | cg10635061 | FHL2     | -0.14 | 1.91E-08 |
| 1382 | cg23978322 | FHL5     | -0.15 | 3.72E-10 |
| 1383 | cg27062617 | FHOD1    | 0.19  | 2.43E-06 |
| 1384 | cg23065097 | FKBP1B   | 0.15  | 8.24E-09 |
| 1385 | cg13401339 | FKBP1B   | 0.15  | 2.09E-04 |
| 1386 | cg19145398 | FKHL18   | -0.10 | 2.38E-04 |
| 1387 | cg08331840 | FKSG2    | -0.12 | 3.23E-08 |
| 1388 | cg26390526 | FLG      | -0.24 | 1.39E-13 |
| 1389 | cg13447818 | FLG      | -0.26 | 2.33E-12 |
| 1390 | cg03602500 | FLJ00060 | -0.30 | 1.26E-25 |
| 1391 | cg25033144 | FLJ00060 | -0.38 | 1.40E-24 |
| 1392 | cg19566405 | FLJ10260 | 0.14  | 2.68E-08 |
| 1393 | cg11644586 | FLJ10786 | -0.11 | 2.64E-03 |
| 1394 | cg04301614 | FLJ11017 | 0.13  | 6.14E-08 |
| 1395 | cg19843036 | FLJ11155 | 0.17  | 8.00E-06 |

|      |            |          |       |          |
|------|------------|----------|-------|----------|
| 1396 | cg01485998 | FLJ12505 | 0.31  | 2.21E-13 |
| 1397 | cg03455458 | FLJ12505 | 0.27  | 1.68E-10 |
| 1398 | cg27383956 | FLJ13265 | -0.12 | 3.12E-06 |
| 1399 | cg13391638 | FLJ13576 | 0.19  | 4.86E-08 |
| 1400 | cg19786920 | FLJ14001 | 0.27  | 6.95E-11 |
| 1401 | cg17178888 | FLJ14166 | 0.13  | 5.16E-05 |
| 1402 | cg11808874 | FLJ14668 | -0.19 | 1.96E-10 |
| 1403 | cg07412254 | FLJ14816 | -0.12 | 3.60E-06 |
| 1404 | cg17204557 | FLJ14816 | -0.15 | 1.61E-06 |
| 1405 | cg08924430 | FLJ20032 | 0.18  | 3.71E-06 |
| 1406 | cg07360692 | FLJ20032 | 0.13  | 8.90E-06 |
| 1407 | cg07717632 | FLJ20245 | 0.34  | 8.10E-19 |
| 1408 | cg03005261 | FLJ20647 | 0.26  | 8.65E-11 |
| 1409 | cg02955988 | FLJ21106 | -0.11 | 2.94E-12 |
| 1410 | cg03616357 | FLJ21159 | 0.40  | 1.78E-18 |
| 1411 | cg25484904 | FLJ21511 | 0.28  | 1.13E-15 |
| 1412 | cg26538442 | FLJ21736 | -0.10 | 3.81E-04 |
| 1413 | cg19229991 | FLJ22655 | -0.13 | 3.65E-09 |
| 1414 | cg10971790 | FLJ22688 | 0.17  | 1.00E-07 |
| 1415 | cg14958018 | FLJ25169 | -0.18 | 6.68E-12 |
| 1416 | cg15903395 | FLJ25369 | -0.10 | 1.44E-06 |
| 1417 | cg08245789 | FLJ25421 | -0.20 | 8.38E-13 |
| 1418 | cg22029275 | FLJ25477 | 0.21  | 6.22E-10 |
| 1419 | cg24169915 | FLJ25773 | -0.13 | 1.32E-20 |
| 1420 | cg06906435 | FLJ25773 | -0.23 | 6.09E-23 |
| 1421 | cg25569462 | FLJ25801 | -0.10 | 3.23E-05 |
| 1422 | cg15648315 | FLJ26443 | -0.14 | 6.60E-06 |
| 1423 | cg26815414 | FLJ26443 | -0.18 | 7.24E-09 |
| 1424 | cg13126790 | FLJ27255 | -0.11 | 1.50E-06 |
| 1425 | cg04329382 | FLJ27365 | 0.20  | 3.94E-09 |
| 1426 | cg19298821 | FLJ27505 | -0.15 | 1.15E-09 |
| 1427 | cg11682508 | FLJ30313 | -0.23 | 2.80E-13 |
| 1428 | cg05396987 | FLJ30834 | 0.16  | 3.70E-08 |
| 1429 | cg19018097 | FLJ30934 | 0.23  | 2.62E-10 |
| 1430 | cg04435377 | FLJ31568 | -0.17 | 1.03E-08 |
| 1431 | cg00393585 | FLJ31659 | 0.17  | 1.62E-09 |
| 1432 | cg19987219 | FLJ32011 | -0.11 | 3.25E-07 |
| 1433 | cg02245378 | FLJ32447 | 0.18  | 3.10E-08 |
| 1434 | cg14159672 | FLJ32569 | 0.22  | 4.60E-09 |
| 1435 | cg14893161 | FLJ32569 | 0.15  | 3.47E-06 |
| 1436 | cg00433406 | FLJ32784 | -0.20 | 7.21E-10 |
| 1437 | cg03113824 | FLJ32926 | -0.19 | 3.22E-12 |
| 1438 | cg18854045 | FLJ33534 | -0.24 | 1.54E-13 |
| 1439 | cg12491659 | FLJ33641 | -0.15 | 5.39E-11 |
| 1440 | cg26331247 | FLJ33706 | -0.15 | 1.93E-12 |
| 1441 | cg18201198 | FLJ33708 | -0.26 | 4.94E-18 |
| 1442 | cg12001148 | FLJ33790 | 0.17  | 2.05E-08 |
| 1443 | cg16547529 | FLJ33790 | 0.12  | 2.41E-07 |
| 1444 | cg14236389 | FLJ33860 | -0.29 | 3.60E-24 |
| 1445 | cg09076077 | FLJ33860 | -0.30 | 2.98E-22 |

|      |            |          |       |          |
|------|------------|----------|-------|----------|
| 1446 | cg21039679 | FLJ35695 | -0.15 | 5.05E-11 |
| 1447 | cg03044435 | FLJ35816 | -0.31 | 2.52E-18 |
| 1448 | cg18604842 | FLJ36046 | -0.11 | 3.40E-10 |
| 1449 | cg04086012 | FLJ36180 | -0.28 | 4.10E-20 |
| 1450 | cg01430430 | FLJ37078 | -0.13 | 8.46E-08 |
| 1451 | cg18289156 | FLJ37357 | 0.15  | 1.51E-04 |
| 1452 | cg21269934 | FLJ37478 | 0.37  | 5.36E-23 |
| 1453 | cg25875213 | FLJ37549 | 0.38  | 4.87E-15 |
| 1454 | cg01703884 | FLJ37587 | -0.10 | 4.66E-06 |
| 1455 | cg26292028 | FLJ37587 | -0.10 | 1.03E-08 |
| 1456 | cg24580001 | FLJ37970 | -0.17 | 9.85E-17 |
| 1457 | cg25784308 | FLJ38377 | 0.11  | 2.18E-04 |
| 1458 | cg13297249 | FLJ38379 | -0.15 | 3.09E-17 |
| 1459 | cg16173109 | FLJ38379 | -0.20 | 9.69E-15 |
| 1460 | cg22158923 | FLJ39237 | -0.13 | 2.84E-07 |
| 1461 | cg08349806 | FLJ39599 | 0.13  | 5.12E-05 |
| 1462 | cg03464655 | FLJ39822 | 0.10  | 6.49E-03 |
| 1463 | cg03213216 | FLJ40125 | 0.30  | 4.58E-19 |
| 1464 | cg00116838 | FLJ40125 | 0.28  | 2.54E-16 |
| 1465 | cg21930712 | FLJ40235 | -0.17 | 1.12E-15 |
| 1466 | cg24469977 | FLJ40288 | -0.16 | 1.58E-09 |
| 1467 | cg07409200 | FLJ40919 | -0.10 | 8.26E-09 |
| 1468 | cg08782122 | FLJ42291 | -0.10 | 1.63E-17 |
| 1469 | cg03734874 | FLJ42486 | 0.18  | 2.82E-08 |
| 1470 | cg00107187 | FLJ42486 | 0.12  | 1.63E-04 |
| 1471 | cg00297584 | FLJ42957 | 0.15  | 7.37E-06 |
| 1472 | cg08301503 | FLJ43752 | 0.14  | 2.39E-05 |
| 1473 | cg04329454 | FLJ43752 | 0.10  | 4.26E-03 |
| 1474 | cg21045388 | FLJ43806 | -0.19 | 1.50E-17 |
| 1475 | cg17657618 | FLJ43806 | -0.22 | 5.35E-18 |
| 1476 | cg23580945 | FLJ43826 | -0.18 | 4.47E-13 |
| 1477 | cg18777554 | FLJ44112 | -0.18 | 1.66E-11 |
| 1478 | cg25032865 | FLJ44186 | -0.12 | 5.07E-12 |
| 1479 | cg17398003 | FLJ44216 | 0.10  | 1.62E-05 |
| 1480 | cg24217877 | FLJ44674 | -0.21 | 5.19E-19 |
| 1481 | cg13897627 | FLJ44674 | -0.30 | 7.22E-27 |
| 1482 | cg21306775 | FLJ44881 | -0.12 | 1.34E-08 |
| 1483 | cg05364569 | FLJ45202 | -0.17 | 8.42E-17 |
| 1484 | cg26776077 | FLJ45202 | -0.26 | 7.39E-20 |
| 1485 | cg18354594 | FLJ45717 | -0.13 | 1.62E-05 |
| 1486 | cg15207953 | FLJ45832 | -0.14 | 2.62E-14 |
| 1487 | cg22954265 | FLJ45832 | -0.16 | 1.16E-16 |
| 1488 | cg10832945 | FLJ45964 | -0.12 | 1.05E-08 |
| 1489 | cg17977362 | FLJ45964 | -0.24 | 3.06E-09 |
| 1490 | cg04765277 | FLJ45983 | 0.14  | 2.33E-05 |
| 1491 | cg19282452 | FLJ46230 | -0.20 | 1.32E-14 |
| 1492 | cg08579995 | FLJ46230 | -0.27 | 5.24E-17 |
| 1493 | cg12682367 | FLJ46358 | -0.23 | 9.33E-22 |
| 1494 | cg07440877 | FLJ46358 | -0.23 | 1.33E-11 |
| 1495 | cg25538571 | FLJ46365 | -0.20 | 1.12E-08 |

|      |            |          |       |          |
|------|------------|----------|-------|----------|
| 1496 | cg03167883 | FLJ46365 | -0.20 | 1.35E-15 |
| 1497 | cg25093045 | FLJ46481 | -0.22 | 1.99E-22 |
| 1498 | cg00958560 | FLJ46481 | -0.30 | 4.36E-23 |
| 1499 | cg03782453 | FLJ90575 | 0.30  | 4.69E-27 |
| 1500 | cg09111484 | FLJ90579 | -0.12 | 3.56E-07 |
| 1501 | cg22367264 | FLJ90579 | -0.13 | 1.23E-08 |
| 1502 | cg25044651 | FLJ90650 | 0.30  | 8.23E-12 |
| 1503 | cg15489294 | FLJ90650 | 0.16  | 3.71E-05 |
| 1504 | cg02661879 | FLNC     | 0.25  | 1.11E-08 |
| 1505 | cg17410236 | FLRT2    | 0.14  | 1.79E-04 |
| 1506 | cg07017374 | FLT3     | 0.25  | 8.33E-10 |
| 1507 | cg00489401 | FLT4     | 0.35  | 8.43E-14 |
| 1508 | cg04945541 | FMNL1    | 0.26  | 2.66E-17 |
| 1509 | cg18063149 | FMO3     | -0.11 | 6.52E-06 |
| 1510 | cg25778166 | FMO3     | -0.12 | 2.74E-06 |
| 1511 | cg04587829 | FN3K     | -0.12 | 1.32E-04 |
| 1512 | cg26750747 | FOLR1    | -0.11 | 1.42E-10 |
| 1513 | cg18818531 | FOSL1    | 0.13  | 4.50E-06 |
| 1514 | cg08583049 | FOXB1    | 0.35  | 2.16E-18 |
| 1515 | cg22777952 | FOXB1    | 0.21  | 2.70E-08 |
| 1516 | cg04504095 | FOXC1    | 0.20  | 6.58E-07 |
| 1517 | cg23867624 | FOXC1    | 0.11  | 4.13E-03 |
| 1518 | cg13958614 | FOXD1    | 0.28  | 1.74E-16 |
| 1519 | cg03663715 | FOXD1    | 0.25  | 3.98E-10 |
| 1520 | cg15868302 | FOXD2    | 0.14  | 8.55E-17 |
| 1521 | cg22815110 | FOXD3    | 0.38  | 6.14E-18 |
| 1522 | cg16708281 | FOXD4L1  | 0.19  | 3.08E-16 |
| 1523 | cg07485588 | FOXD4L4  | 0.13  | 4.42E-13 |
| 1524 | cg19292008 | FOXE1    | 0.18  | 5.89E-07 |
| 1525 | cg18815943 | FOXE3    | 0.53  | 1.82E-22 |
| 1526 | cg25971347 | FOXF1    | 0.15  | 4.02E-05 |
| 1527 | cg08045570 | FOXF2    | 0.13  | 5.18E-04 |
| 1528 | cg10300684 | FOXG1B   | 0.21  | 1.01E-09 |
| 1529 | cg02681442 | FOXG1B   | 0.16  | 6.10E-08 |
| 1530 | cg19233472 | FOXI1    | -0.17 | 1.97E-07 |
| 1531 | cg00661485 | FOXI1    | -0.36 | 6.53E-20 |
| 1532 | cg14312526 | FOXL2    | 0.36  | 2.91E-14 |
| 1533 | cg17503456 | FOXL2    | 0.32  | 1.00E-12 |
| 1534 | cg10213812 | FOXN1    | -0.14 | 3.89E-12 |
| 1535 | cg05755354 | FRMD4A   | -0.21 | 5.05E-12 |
| 1536 | cg25464840 | FRMD4A   | -0.23 | 3.86E-15 |
| 1537 | cg16046465 | FRMD5    | 0.32  | 4.35E-12 |
| 1538 | cg06206628 | FRMPD2   | -0.14 | 1.17E-08 |
| 1539 | cg20308679 | FRZB     | 0.26  | 5.82E-12 |
| 1540 | cg19568591 | FRZB     | 0.15  | 9.89E-06 |
| 1541 | cg25176823 | FSCN1    | 0.34  | 8.09E-21 |
| 1542 | cg25902889 | FSD1     | 0.18  | 3.43E-17 |
| 1543 | cg27420123 | FSHB     | -0.19 | 3.43E-24 |
| 1544 | cg17327492 | FSHR     | -0.28 | 1.16E-22 |
| 1545 | cg04963951 | FTMT     | -0.19 | 1.08E-13 |

|      |            |         |       |          |
|------|------------|---------|-------|----------|
| 1546 | cg11234457 | FTMT    | -0.24 | 3.20E-17 |
| 1547 | cg00796728 | FUT4    | 0.16  | 4.07E-06 |
| 1548 | cg12631737 | FUT4    | 0.11  | 2.19E-04 |
| 1549 | cg00579402 | FUT6    | 0.10  | 9.98E-04 |
| 1550 | cg10225525 | FUT8    | -0.15 | 3.47E-09 |
| 1551 | cg25894551 | FXVD2   | -0.14 | 8.86E-06 |
| 1552 | cg25081201 | FXVD4   | -0.10 | 4.34E-10 |
| 1553 | cg12619162 | FXVD4   | -0.23 | 1.30E-14 |
| 1554 | cg17682828 | FXVD7   | 0.14  | 2.53E-05 |
| 1555 | cg17100322 | FYN     | 0.23  | 6.52E-07 |
| 1556 | cg25228126 | FZD2    | 0.18  | 5.58E-09 |
| 1557 | cg21975377 | FZD6    | 0.11  | 9.75E-04 |
| 1558 | cg12618251 | FZD7    | 0.15  | 4.84E-05 |
| 1559 | cg20692569 | FZD9    | 0.28  | 1.24E-24 |
| 1560 | cg18438300 | FZD9    | -0.15 | 7.79E-13 |
| 1561 | cg07903918 | GABBR2  | 0.11  | 9.52E-04 |
| 1562 | cg24387380 | GABRA5  | -0.14 | 2.66E-11 |
| 1563 | cg07592353 | GABRA6  | -0.15 | 8.43E-14 |
| 1564 | cg24244000 | GABRG3  | -0.12 | 2.04E-07 |
| 1565 | cg27592112 | GABRG3  | -0.21 | 2.53E-13 |
| 1566 | cg23181170 | GABRP   | -0.13 | 4.88E-10 |
| 1567 | cg21652012 | GABRP   | -0.18 | 1.95E-07 |
| 1568 | cg18047970 | GADL1   | -0.20 | 2.59E-09 |
| 1569 | cg15946807 | GADL1   | -0.22 | 5.81E-11 |
| 1570 | cg21238818 | GAL3ST3 | 0.27  | 6.57E-16 |
| 1571 | cg01725199 | GALNT12 | 0.38  | 5.59E-14 |
| 1572 | cg05593325 | GALNT12 | 0.20  | 2.53E-09 |
| 1573 | cg05714219 | GALNT14 | 0.32  | 4.22E-13 |
| 1574 | cg21549904 | GALNT7  | 0.19  | 1.11E-05 |
| 1575 | cg13255190 | GALNT8  | -0.12 | 3.52E-14 |
| 1576 | cg14920334 | GALNT8  | -0.15 | 2.55E-09 |
| 1577 | cg11091262 | GALNTL5 | -0.13 | 5.89E-09 |
| 1578 | cg00662556 | GALR1   | 0.14  | 2.50E-04 |
| 1579 | cg04534765 | GALR1   | 0.13  | 1.78E-03 |
| 1580 | cg02293044 | GAS2L1  | -0.10 | 5.25E-05 |
| 1581 | cg26420196 | GAS6    | 0.13  | 5.00E-04 |
| 1582 | cg22471346 | GAS7    | 0.36  | 5.05E-13 |
| 1583 | cg06490988 | GATA2   | 0.17  | 6.93E-06 |
| 1584 | cg06230736 | GATA3   | 0.29  | 1.18E-09 |
| 1585 | cg19172575 | GATA4   | 0.12  | 2.00E-08 |
| 1586 | cg01546563 | GATA4   | 0.11  | 6.18E-05 |
| 1587 | cg09923671 | GATA5   | -0.14 | 1.58E-10 |
| 1588 | cg16542081 | GATA5   | -0.15 | 1.12E-12 |
| 1589 | cg14519000 | GATA5   | -0.17 | 7.45E-13 |
| 1590 | cg04132607 | GATA5   | -0.19 | 3.74E-18 |
| 1591 | cg20822628 | GATA5   | -0.19 | 2.22E-10 |
| 1592 | cg09864990 | GATA5   | -0.23 | 1.05E-19 |
| 1593 | cg17740305 | GBP5    | -0.12 | 2.12E-24 |
| 1594 | cg06954481 | GBX2    | 0.29  | 2.01E-09 |
| 1595 | cg23095584 | GBX2    | 0.24  | 6.12E-13 |



|      |            |         |       |          |
|------|------------|---------|-------|----------|
| 1596 | cg25462303 | GCET2   | -0.16 | 4.98E-18 |
| 1597 | cg15001372 | GCK     | -0.13 | 4.70E-10 |
| 1598 | cg02844545 | GCM2    | 0.16  | 6.31E-07 |
| 1599 | cg22289360 | GCNT1   | 0.29  | 1.72E-12 |
| 1600 | cg09885086 | GCNT1   | 0.23  | 1.51E-09 |
| 1601 | cg23877385 | GCNT3   | -0.12 | 3.82E-06 |
| 1602 | cg00509616 | Gcom1   | 0.30  | 4.66E-12 |
| 1603 | cg04448487 | GDAP1L1 | 0.37  | 1.61E-18 |
| 1604 | cg17810944 | GDAP1L1 | 0.11  | 5.56E-04 |
| 1605 | cg26090660 | GDEP    | -0.12 | 4.77E-16 |
| 1606 | cg02255004 | GDEP    | -0.18 | 1.28E-10 |
| 1607 | cg07773116 | GDF10   | 0.11  | 5.69E-03 |
| 1608 | cg21115977 | GDF2    | -0.18 | 8.85E-10 |
| 1609 | cg07378350 | GDF5    | -0.17 | 3.24E-10 |
| 1610 | cg07715201 | GNDF    | 0.10  | 6.07E-04 |
| 1611 | cg03297731 | GDPD3   | -0.18 | 5.80E-09 |
| 1612 | cg11452221 | GEFT    | 0.12  | 4.58E-05 |
| 1613 | cg02364642 | GEFT    | 0.12  | 5.53E-06 |
| 1614 | cg09038914 | GFAP    | -0.13 | 1.07E-07 |
| 1615 | cg20125091 | GFI1    | 0.28  | 9.79E-13 |
| 1616 | cg22341104 | GFI1    | 0.22  | 8.67E-07 |
| 1617 | cg00194146 | GFOD1   | 0.25  | 1.92E-08 |
| 1618 | cg18602314 | GFPT2   | 0.21  | 7.62E-09 |
| 1619 | cg21937886 | GFPT2   | 0.18  | 1.85E-06 |
| 1620 | cg09350274 | GFRA3   | 0.28  | 2.28E-14 |
| 1621 | cg02990033 | GFRA4   | -0.15 | 5.19E-10 |
| 1622 | cg13424446 | GGTLA4  | -0.14 | 1.41E-19 |
| 1623 | cg19882093 | GGTLA4  | -0.14 | 6.84E-13 |
| 1624 | cg13204181 | GH1     | -0.23 | 6.66E-13 |
| 1625 | cg05131835 | GH2     | -0.19 | 6.62E-14 |
| 1626 | cg04459030 | GHRH    | -0.22 | 1.38E-15 |
| 1627 | cg11812218 | GHSR    | 0.13  | 5.78E-06 |
| 1628 | cg18538812 | GIF     | -0.20 | 7.78E-10 |
| 1629 | cg26970800 | GIF     | -0.28 | 6.25E-13 |
| 1630 | cg13043509 | GIMAP5  | 0.17  | 6.39E-09 |
| 1631 | cg01827098 | GIMAP7  | -0.15 | 1.73E-06 |
| 1632 | cg20551517 | GIP     | -0.15 | 1.31E-06 |
| 1633 | cg12428416 | GJA3    | -0.21 | 9.55E-15 |
| 1634 | cg07070934 | GJA4    | 0.12  | 1.91E-04 |
| 1635 | cg11054936 | GJB2    | -0.12 | 2.51E-13 |
| 1636 | cg15554401 | GJB4    | -0.17 | 1.10E-10 |
| 1637 | cg15750705 | GJB4    | -0.22 | 8.46E-16 |
| 1638 | cg01333788 | GJB5    | -0.14 | 2.92E-07 |
| 1639 | cg08612871 | GJB5    | -0.15 | 1.96E-10 |
| 1640 | cg22377389 | GJB6    | 0.25  | 2.31E-09 |
| 1641 | cg03473518 | GJB6    | 0.18  | 5.49E-07 |
| 1642 | cg17738194 | GK2     | -0.22 | 8.05E-25 |
| 1643 | cg14078518 | GK2     | -0.25 | 1.17E-17 |
| 1644 | cg13877895 | GKN1    | -0.10 | 1.27E-04 |
| 1645 | cg06941093 | GLIS1   | -0.11 | 2.60E-08 |

|      |            |         |       |          |
|------|------------|---------|-------|----------|
| 1646 | cg26781150 | GLOXD1  | 0.26  | 1.41E-09 |
| 1647 | cg10164640 | GLOXD1  | 0.21  | 1.25E-07 |
| 1648 | cg25014318 | GLP1R   | 0.11  | 4.64E-04 |
| 1649 | cg01056568 | GLP2R   | -0.10 | 4.25E-07 |
| 1650 | cg20261915 | GLP2R   | -0.17 | 5.71E-10 |
| 1651 | cg15522719 | GLS     | 0.10  | 1.42E-03 |
| 1652 | cg14313310 | GLT25D2 | 0.18  | 2.33E-07 |
| 1653 | cg16791686 | GLTSCR2 | -0.21 | 6.44E-18 |
| 1654 | cg02436686 | GMFG    | -0.13 | 2.99E-08 |
| 1655 | cg00057593 | GML     | -0.17 | 2.85E-12 |
| 1656 | cg07711097 | GML     | -0.31 | 2.60E-25 |
| 1657 | cg14917512 | GNA11   | 0.37  | 4.97E-23 |
| 1658 | cg17301902 | GNA14   | 0.32  | 6.50E-17 |
| 1659 | cg14371329 | GNAL    | -0.18 | 4.00E-11 |
| 1660 | cg25983380 | GNAS    | 0.22  | 4.93E-20 |
| 1661 | cg00943909 | GNAS    | -0.11 | 1.43E-05 |
| 1662 | cg01565918 | GNAS    | -0.11 | 8.72E-08 |
| 1663 | cg05558390 | GNAS    | -0.11 | 2.99E-04 |
| 1664 | cg17414107 | GNAS    | -0.11 | 5.91E-06 |
| 1665 | cg20582984 | GNAS    | -0.12 | 9.47E-07 |
| 1666 | cg14203179 | GNAS    | -0.12 | 2.89E-05 |
| 1667 | cg14597908 | GNAS    | -0.12 | 7.68E-06 |
| 1668 | cg03606258 | GNAS    | -0.15 | 1.27E-07 |
| 1669 | cg06324048 | GNAS    | -0.15 | 4.86E-12 |
| 1670 | cg25268451 | GNAS    | -0.16 | 8.69E-08 |
| 1671 | cg16833551 | GNAS    | -0.19 | 4.49E-10 |
| 1672 | cg07284407 | GNAS    | -0.23 | 6.31E-14 |
| 1673 | cg21988465 | GNAS    | -0.26 | 2.60E-16 |
| 1674 | cg17483510 | GNB4    | 0.37  | 2.69E-23 |
| 1675 | cg09997760 | GNB4    | 0.19  | 1.04E-06 |
| 1676 | cg26764244 | GNG12   | 0.10  | 9.66E-05 |
| 1677 | cg09649610 | GNG4    | 0.20  | 4.79E-08 |
| 1678 | cg17839611 | GNGT2   | -0.27 | 2.36E-13 |
| 1679 | cg24751129 | GNMT    | -0.20 | 2.42E-10 |
| 1680 | cg04267184 | GNRH2   | 0.29  | 4.87E-23 |
| 1681 | cg27219973 | GNRHR   | -0.14 | 1.03E-10 |
| 1682 | cg01714513 | GOLGA8A | -0.11 | 2.15E-10 |
| 1683 | cg24852661 | GOLPH2  | 0.13  | 1.18E-04 |
| 1684 | cg24798047 | GOLT1A  | -0.12 | 1.30E-10 |
| 1685 | cg07359545 | GP1BB   | -0.12 | 8.07E-04 |
| 1686 | cg24987706 | GPA33   | -0.13 | 5.38E-07 |
| 1687 | cg06665322 | GPA33   | -0.13 | 5.36E-07 |
| 1688 | cg12137206 | GPAM    | 0.20  | 6.77E-08 |
| 1689 | cg24965984 | GPAM    | 0.16  | 1.59E-05 |
| 1690 | cg18691434 | GPC2    | 0.40  | 5.48E-23 |
| 1691 | cg05662500 | GPD1L   | 0.14  | 3.32E-04 |
| 1692 | cg14023451 | GPLD1   | -0.16 | 6.66E-11 |
| 1693 | cg22932819 | GPNMB   | -0.10 | 1.12E-05 |
| 1694 | cg17274742 | GPNMB   | -0.14 | 1.26E-08 |
| 1695 | cg19132372 | GPR1    | -0.23 | 1.87E-14 |

|      |            |         |       |          |
|------|------------|---------|-------|----------|
| 1696 | cg12014417 | GPR109A | -0.18 | 2.23E-19 |
| 1697 | cg03311899 | GPR109A | -0.25 | 1.17E-20 |
| 1698 | cg15447486 | GPR109B | -0.15 | 2.64E-12 |
| 1699 | cg05384917 | GPR109B | -0.25 | 6.54E-14 |
| 1700 | cg09069593 | GPR114  | -0.22 | 3.81E-17 |
| 1701 | cg23613030 | GPR115  | -0.16 | 1.24E-10 |
| 1702 | cg18841952 | GPR115  | -0.21 | 6.03E-20 |
| 1703 | cg14045072 | GPR116  | -0.17 | 4.35E-07 |
| 1704 | cg15726245 | GPR12   | -0.18 | 2.03E-11 |
| 1705 | cg21607649 | GPR123  | -0.11 | 4.70E-10 |
| 1706 | cg20011352 | GPR124  | 0.19  | 1.04E-07 |
| 1707 | cg26514492 | GPR132  | -0.23 | 4.89E-11 |
| 1708 | cg24995381 | GPR141  | -0.34 | 1.92E-19 |
| 1709 | cg22377428 | GPR142  | -0.16 | 2.17E-09 |
| 1710 | cg03803009 | GPR142  | -0.29 | 1.21E-21 |
| 1711 | cg04037952 | GPR148  | -0.23 | 4.88E-12 |
| 1712 | cg04597449 | GPR150  | 0.23  | 4.72E-12 |
| 1713 | cg02320454 | GPR150  | 0.16  | 2.52E-06 |
| 1714 | cg18741908 | GPR160  | 0.28  | 1.79E-20 |
| 1715 | cg26575445 | GPR160  | 0.18  | 9.44E-08 |
| 1716 | cg17805404 | GPR162  | 0.14  | 1.15E-07 |
| 1717 | cg21870884 | GPR25   | 0.29  | 1.56E-15 |
| 1718 | cg04983977 | GPR25   | 0.12  | 1.98E-20 |
| 1719 | cg13562542 | GPR27   | 0.38  | 1.41E-13 |
| 1720 | cg22631938 | GPR27   | 0.23  | 2.76E-12 |
| 1721 | cg12970081 | GPR32   | -0.22 | 5.17E-16 |
| 1722 | cg07432969 | GPR35   | -0.20 | 5.94E-18 |
| 1723 | cg13097816 | GPR35   | -0.24 | 2.77E-12 |
| 1724 | cg26026726 | GPR42   | -0.18 | 9.30E-10 |
| 1725 | cg23661676 | GPR42   | -0.23 | 8.62E-14 |
| 1726 | cg22253945 | GPR45   | -0.22 | 3.66E-14 |
| 1727 | cg21399079 | GPR45   | -0.22 | 4.41E-11 |
| 1728 | cg26252167 | GPR6    | 0.21  | 1.66E-07 |
| 1729 | cg12800028 | GPR6    | 0.11  | 9.25E-04 |
| 1730 | cg10189695 | GPR78   | 0.21  | 8.36E-08 |
| 1731 | cg27634151 | GPR83   | 0.24  | 1.02E-12 |
| 1732 | cg21969640 | GPR84   | -0.22 | 2.42E-12 |
| 1733 | cg10298815 | GPR88   | 0.12  | 5.65E-04 |
| 1734 | cg14934821 | GPSM1   | -0.10 | 6.05E-06 |
| 1735 | cg13237829 | GPSN2   | 0.14  | 2.24E-09 |
| 1736 | cg15983520 | GPT     | -0.12 | 2.95E-08 |
| 1737 | cg06613840 | GPX1    | -0.12 | 7.34E-08 |
| 1738 | cg18849169 | GPX3    | -0.18 | 7.03E-14 |
| 1739 | cg16557944 | GPX7    | 0.28  | 3.82E-08 |
| 1740 | cg22129364 | GPX7    | 0.22  | 2.71E-08 |
| 1741 | cg15165084 | GRAMD3  | 0.19  | 6.56E-04 |
| 1742 | cg08704509 | GRAMD3  | 0.14  | 9.36E-05 |
| 1743 | cg25712380 | GRAP2   | -0.16 | 7.86E-11 |
| 1744 | cg04034767 | GRASP   | 0.45  | 4.36E-23 |
| 1745 | cg22566906 | GRASP   | -0.11 | 9.50E-05 |

|      |            |         |       |          |
|------|------------|---------|-------|----------|
| 1746 | cg17740645 | GRB7    | -0.12 | 1.54E-05 |
| 1747 | cg03684977 | GRB7    | -0.15 | 1.48E-06 |
| 1748 | cg18145505 | GREM1   | 0.29  | 7.09E-13 |
| 1749 | cg21296230 | GREM1   | 0.19  | 1.41E-06 |
| 1750 | cg16155382 | GRHL3   | 0.22  | 7.80E-10 |
| 1751 | cg15050111 | GRHL3   | 0.22  | 7.45E-10 |
| 1752 | cg15425280 | GRIA2   | 0.13  | 2.59E-05 |
| 1753 | cg09555879 | GRIK5   | -0.32 | 9.25E-22 |
| 1754 | cg09414535 | GRIP1   | -0.15 | 5.60E-11 |
| 1755 | cg24694549 | GRIP1   | -0.27 | 2.85E-15 |
| 1756 | cg21710060 | GRK1    | -0.11 | 2.09E-08 |
| 1757 | cg09034896 | GRK1    | -0.14 | 1.27E-05 |
| 1758 | cg15550350 | GRK7    | -0.17 | 1.62E-13 |
| 1759 | cg26424956 | GRM4    | -0.27 | 6.09E-17 |
| 1760 | cg01962826 | GRM4    | -0.40 | 4.71E-24 |
| 1761 | cg14859460 | GRM6    | 0.13  | 1.88E-03 |
| 1762 | cg02946850 | GRM8    | -0.26 | 4.88E-16 |
| 1763 | cg19224837 | GSC     | 0.10  | 4.03E-04 |
| 1764 | cg26599006 | GSCL    | 0.32  | 1.66E-12 |
| 1765 | cg26609631 | GSH1    | 0.27  | 1.01E-08 |
| 1766 | cg03070194 | GSTM2   | 0.39  | 1.81E-24 |
| 1767 | cg16670497 | GSTM2   | 0.28  | 3.43E-17 |
| 1768 | cg04987894 | GSTM5   | 0.16  | 3.97E-08 |
| 1769 | cg25250998 | GSTO2   | 0.17  | 2.19E-04 |
| 1770 | cg15410903 | GSTO2   | 0.11  | 2.94E-02 |
| 1771 | cg02659086 | GSTP1   | 0.39  | 7.81E-18 |
| 1772 | cg04920951 | GSTP1   | 0.39  | 7.19E-21 |
| 1773 | cg09038676 | GSTP1   | 0.29  | 5.39E-13 |
| 1774 | cg11566244 | GSTP1   | 0.11  | 3.36E-05 |
| 1775 | cg06003187 | GUCA2A  | -0.20 | 1.10E-10 |
| 1776 | cg23984434 | GUCY1A2 | 0.20  | 2.25E-06 |
| 1777 | cg02210887 | GUCY1A3 | -0.11 | 4.87E-08 |
| 1778 | cg13274254 | GULP1   | 0.20  | 1.09E-08 |
| 1779 | cg24938727 | GUP1    | 0.17  | 4.14E-07 |
| 1780 | cg00407150 | GUP1    | -0.13 | 1.05E-10 |
| 1781 | cg09841009 | GYPA    | -0.30 | 1.65E-21 |
| 1782 | cg16636571 | GYPB    | -0.11 | 4.77E-12 |
| 1783 | cg27214365 | GYPB    | -0.31 | 7.22E-23 |
| 1784 | cg13143729 | GYPE    | -0.12 | 8.54E-15 |
| 1785 | cg16998872 | GYPE    | -0.30 | 2.65E-22 |
| 1786 | cg06118312 | GZMA    | -0.16 | 4.65E-14 |
| 1787 | cg08766149 | GZMB    | -0.38 | 6.62E-22 |
| 1788 | cg22228134 | GZMH    | -0.21 | 7.47E-16 |
| 1789 | cg04705866 | GZMK    | -0.11 | 2.13E-08 |
| 1790 | cg18338021 | GZMM    | -0.14 | 6.52E-09 |
| 1791 | cg02657360 | H19     | -0.11 | 8.89E-09 |
| 1792 | cg23977670 | H19     | -0.12 | 7.97E-10 |
| 1793 | cg10602543 | H19     | -0.14 | 2.27E-07 |
| 1794 | cg25852472 | H19     | -0.15 | 1.91E-07 |
| 1795 | cg17769238 | H19     | -0.17 | 1.94E-09 |

|      |            |           |       |          |
|------|------------|-----------|-------|----------|
| 1796 | cg11492040 | H19       | -0.18 | 3.05E-09 |
| 1797 | cg26808784 | H19       | -0.27 | 2.49E-13 |
| 1798 | cg00745543 | H1T2      | -0.24 | 1.95E-15 |
| 1799 | cg00601486 | H1T2      | -0.38 | 1.42E-24 |
| 1800 | cg24628744 | H2AFY     | 0.13  | 3.57E-13 |
| 1801 | cg01550148 | H2AFY     | 0.11  | 4.94E-14 |
| 1802 | cg15783800 | HAK       | -0.14 | 1.57E-06 |
| 1803 | cg19721889 | HAND1     | 0.12  | 8.59E-05 |
| 1804 | cg01580681 | HAND2     | 0.19  | 8.67E-07 |
| 1805 | cg06434428 | HAPLN1    | -0.18 | 1.55E-09 |
| 1806 | cg14449575 | HAPLN4    | 0.15  | 3.34E-15 |
| 1807 | cg13300756 | HAS1      | -0.32 | 8.19E-21 |
| 1808 | cg14141399 | HAS1      | -0.39 | 1.07E-20 |
| 1809 | cg17484237 | HAVCR2    | -0.18 | 1.77E-20 |
| 1810 | cg20609368 | HBD       | -0.24 | 5.17E-21 |
| 1811 | cg08970694 | HBE1      | -0.19 | 6.57E-26 |
| 1812 | cg01598642 | HBG1      | -0.29 | 9.91E-23 |
| 1813 | cg09839960 | HBII-438B | -0.20 | 1.42E-16 |
| 1814 | cg07703401 | HBQ1      | 0.43  | 5.92E-22 |
| 1815 | cg21960110 | HBZ       | -0.14 | 9.27E-07 |
| 1816 | cg04623837 | HCG9      | 0.34  | 9.32E-17 |
| 1817 | cg23244913 | HCG9      | 0.31  | 2.53E-17 |
| 1818 | cg00141162 | HCLS1     | 0.20  | 1.14E-10 |
| 1819 | cg06005396 | HCN2      | 0.17  | 3.02E-10 |
| 1820 | cg02860342 | HCN4      | 0.17  | 1.49E-08 |
| 1821 | cg17063201 | HCRTR2    | -0.23 | 4.55E-15 |
| 1822 | cg24385322 | HDAC3     | 0.26  | 4.19E-10 |
| 1823 | cg10414058 | HDAC3     | 0.25  | 1.55E-14 |
| 1824 | cg00746981 | HDGF      | 0.25  | 6.55E-17 |
| 1825 | cg21070087 | HECW1     | -0.18 | 9.84E-12 |
| 1826 | cg17628717 | HECW1     | -0.25 | 4.35E-17 |
| 1827 | cg17605084 | HEM1      | -0.11 | 1.25E-05 |
| 1828 | cg27592318 | HEMGN     | -0.18 | 1.11E-09 |
| 1829 | cg02397514 | HES4      | 0.24  | 4.08E-07 |
| 1830 | cg24127874 | HES6      | 0.20  | 6.85E-08 |
| 1831 | cg04700814 | HEXIM1    | 0.13  | 3.45E-08 |
| 1832 | cg12866859 | HEXIM1    | 0.11  | 7.69E-06 |
| 1833 | cg25462291 | HEYL      | 0.25  | 2.91E-09 |
| 1834 | cg06589885 | HFE2      | -0.16 | 3.59E-11 |
| 1835 | cg08005849 | HGF       | -0.10 | 2.13E-06 |
| 1836 | cg07364841 | HGFAC     | 0.19  | 2.82E-15 |
| 1837 | cg02879662 | HIF3A     | 0.13  | 1.90E-05 |
| 1838 | cg07123548 | HIPK4     | -0.15 | 3.05E-16 |
| 1839 | cg14652095 | HIST1H1A  | 0.13  | 4.44E-13 |
| 1840 | cg17711541 | HIST1H2AC | 0.11  | 1.39E-06 |
| 1841 | cg20520725 | HIST1H2AE | 0.35  | 1.27E-23 |
| 1842 | cg24358465 | HIST1H2AG | 0.17  | 2.50E-04 |
| 1843 | cg10046620 | HIST1H2AI | 0.31  | 1.41E-13 |
| 1844 | cg03221914 | HIST1H2AJ | 0.19  | 1.43E-16 |
| 1845 | cg17050972 | HIST1H2AJ | 0.18  | 1.71E-07 |

|      |            |             |       |          |
|------|------------|-------------|-------|----------|
| 1846 | cg02367951 | HIST1H2AK   | 0.12  | 2.41E-12 |
| 1847 | cg21146268 | HIST1H2BE   | 0.12  | 7.37E-06 |
| 1848 | cg21663122 | HIST1H2BH   | 0.35  | 6.44E-21 |
| 1849 | cg14776962 | HIST1H2BH   | 0.22  | 1.55E-14 |
| 1850 | cg02192855 | HIST1H2BI   | 0.25  | 2.20E-11 |
| 1851 | cg27059238 | HIST1H2BI   | 0.11  | 1.89E-10 |
| 1852 | cg08797106 | HIST1H3A    | 0.16  | 2.81E-16 |
| 1853 | cg24784109 | HIST1H3D    | 0.11  | 2.61E-09 |
| 1854 | cg05414338 | HIST1H3F    | 0.27  | 8.92E-12 |
| 1855 | cg06254453 | HIST1H3F    | 0.23  | 6.29E-11 |
| 1856 | cg02909790 | HIST1H3G    | 0.39  | 1.05E-22 |
| 1857 | cg17718302 | HIST1H3J    | 0.48  | 1.69E-24 |
| 1858 | cg17965019 | HIST1H3J    | 0.39  | 2.11E-18 |
| 1859 | cg08260959 | HIST1H4F    | 0.38  | 5.52E-22 |
| 1860 | cg05159188 | HIST1H4F    | 0.22  | 4.57E-09 |
| 1861 | cg17651821 | HIST1H4L    | 0.15  | 6.60E-04 |
| 1862 | cg14415300 | HIST2H2AA   | 0.28  | 3.05E-18 |
| 1863 | cg14743462 | HIST3H2A    | 0.28  | 8.69E-13 |
| 1864 | cg00143998 | HIST3H2BB   | 0.16  | 4.28E-08 |
| 1865 | cg14541950 | HIST3H2BB   | 0.14  | 1.23E-06 |
| 1866 | cg06323290 | HK1         | -0.11 | 3.91E-05 |
| 1867 | cg24107142 | HK2         | -0.25 | 1.18E-19 |
| 1868 | cg18638581 | HK2         | -0.26 | 1.30E-17 |
| 1869 | cg14709481 | HK3         | -0.17 | 3.30E-13 |
| 1870 | cg14166009 | HKR1        | 0.22  | 9.69E-12 |
| 1871 | cg12024906 | HKR1        | 0.20  | 2.92E-05 |
| 1872 | cg20879959 | HLA-A       | 0.13  | 1.82E-05 |
| 1873 | cg16097079 | HLA-C       | 0.11  | 3.71E-05 |
| 1874 | cg16899306 | HLA-DQB2    | -0.19 | 2.76E-14 |
| 1875 | cg04345908 | HLA-DQB2    | -0.20 | 2.22E-17 |
| 1876 | cg25764570 | HLA-DRA     | -0.17 | 5.49E-11 |
| 1877 | cg10746737 | HLA-DRB5    | -0.17 | 4.50E-09 |
| 1878 | cg17475918 | HLA-E       | 0.15  | 1.57E-04 |
| 1879 | cg21529533 | HLA-G       | 0.21  | 8.18E-09 |
| 1880 | cg04219321 | HLF         | 0.18  | 2.08E-05 |
| 1881 | cg20899053 | HLXB9       | 0.26  | 4.60E-09 |
| 1882 | cg03020951 | HMGA1       | 0.35  | 7.78E-21 |
| 1883 | cg10212621 | HMGCS2      | -0.11 | 9.27E-08 |
| 1884 | cg22718139 | HMGCS2      | -0.12 | 5.04E-05 |
| 1885 | cg13176979 | HMG3        | 0.12  | 3.92E-05 |
| 1886 | cg23834593 | HNF4A       | -0.14 | 2.57E-10 |
| 1887 | cg22062068 | HNRNPG-T    | -0.13 | 5.89E-06 |
| 1888 | cg00363813 | HOM-TES-103 | -0.20 | 1.44E-09 |
| 1889 | cg03700462 | HOXA1       | 0.13  | 1.03E-06 |
| 1890 | cg15760840 | HOXA11      | 0.16  | 2.03E-07 |
| 1891 | cg17950095 | HOXA11      | 0.12  | 6.91E-04 |
| 1892 | cg06397837 | HOXA13      | 0.28  | 3.80E-14 |
| 1893 | cg10883303 | HOXA13      | 0.27  | 6.32E-07 |
| 1894 | cg26069745 | HOXA2       | 0.22  | 1.63E-08 |
| 1895 | cg09871315 | HOXA2       | 0.17  | 3.49E-06 |

|      |            |         |       |          |
|------|------------|---------|-------|----------|
| 1896 | cg25426743 | HOXA3   | 0.11  | 5.07E-08 |
| 1897 | cg24169822 | HOXA4   | 0.19  | 1.32E-08 |
| 1898 | cg04317399 | HOXA4   | 0.13  | 1.44E-04 |
| 1899 | cg02248486 | HOXA5   | 0.12  | 3.27E-03 |
| 1900 | cg04265576 | HOXA6   | 0.21  | 8.81E-07 |
| 1901 | cg23432345 | HOXA7   | 0.31  | 2.27E-12 |
| 1902 | cg26511321 | HOXA7   | 0.22  | 1.73E-10 |
| 1903 | cg26521404 | HOXA9   | 0.38  | 1.31E-15 |
| 1904 | cg01354473 | HOXA9   | 0.33  | 2.51E-16 |
| 1905 | cg07778029 | HOXA9   | 0.32  | 1.35E-14 |
| 1906 | cg27009703 | HOXA9   | 0.26  | 1.09E-12 |
| 1907 | cg01381846 | HOXA9   | 0.26  | 9.82E-15 |
| 1908 | cg25047280 | HOXA9   | 0.23  | 2.70E-10 |
| 1909 | cg07823492 | HOXB1   | -0.12 | 3.63E-04 |
| 1910 | cg25882366 | HOXB2   | 0.13  | 8.27E-05 |
| 1911 | cg09313705 | HOXB2   | 0.11  | 3.35E-12 |
| 1912 | cg21460081 | HOXB4   | 0.22  | 6.78E-15 |
| 1913 | cg08089301 | HOXB4   | 0.13  | 8.41E-05 |
| 1914 | cg15539420 | HOXB8   | 0.11  | 2.14E-03 |
| 1915 | cg26153631 | HOXC10  | 0.13  | 1.43E-06 |
| 1916 | cg07123069 | HOXC11  | 0.13  | 1.74E-05 |
| 1917 | cg15700739 | HOXC5   | 0.14  | 3.51E-08 |
| 1918 | cg19001226 | HOXD1   | 0.12  | 3.99E-04 |
| 1919 | cg16632715 | HOXD11  | 0.23  | 2.31E-09 |
| 1920 | cg19325985 | HOXD13  | 0.15  | 1.63E-07 |
| 1921 | cg00005847 | HOXD3   | 0.13  | 1.13E-05 |
| 1922 | cg00767581 | HOXD4   | 0.11  | 1.00E-03 |
| 1923 | cg12127282 | HOXD4   | 0.11  | 1.61E-03 |
| 1924 | cg15520279 | HOXD8   | 0.44  | 6.56E-20 |
| 1925 | cg10957151 | HOXD9   | 0.11  | 1.23E-04 |
| 1926 | cg24417499 | HPCA    | 0.19  | 2.99E-08 |
| 1927 | cg11147193 | HPCAL1  | -0.12 | 3.47E-09 |
| 1928 | cg00979348 | HPSE    | 0.10  | 6.15E-06 |
| 1929 | cg27016307 | HRC     | -0.12 | 7.49E-08 |
| 1930 | cg14837082 | HRH1    | -0.11 | 2.47E-12 |
| 1931 | cg14345676 | HRH2    | -0.14 | 6.33E-11 |
| 1932 | cg20277670 | HRH2    | -0.32 | 2.54E-21 |
| 1933 | cg08186362 | HRH3    | 0.25  | 3.02E-08 |
| 1934 | cg10605520 | HRH3    | 0.12  | 1.57E-04 |
| 1935 | cg20373326 | HSD17B2 | -0.10 | 1.29E-06 |
| 1936 | cg26359240 | HSDL1   | -0.14 | 6.84E-13 |
| 1937 | cg15127733 | HSPA12B | 0.11  | 1.31E-05 |
| 1938 | cg09458237 | HSPA12B | -0.23 | 4.07E-16 |
| 1939 | cg27120999 | HSPA2   | 0.38  | 1.27E-24 |
| 1940 | cg24642523 | HSPA2   | 0.34  | 2.82E-18 |
| 1941 | cg01520924 | HSPA2   | 0.14  | 1.56E-03 |
| 1942 | cg16319578 | HSPA2   | 0.13  | 3.28E-04 |
| 1943 | cg13817266 | HSPA6   | 0.13  | 6.93E-08 |
| 1944 | cg22189286 | HSPB8   | -0.20 | 1.14E-10 |
| 1945 | cg05346140 | HSPB9   | -0.12 | 6.45E-04 |

|      |            |          |       |          |
|------|------------|----------|-------|----------|
| 1946 | cg02968557 | HSPB9    | -0.14 | 5.72E-05 |
| 1947 | cg12582959 | HSU79303 | 0.10  | 2.12E-03 |
| 1948 | cg15846641 | HTLF     | 0.14  | 7.52E-05 |
| 1949 | cg06545504 | HTN1     | -0.11 | 6.78E-06 |
| 1950 | cg20887241 | HTR1D    | -0.10 | 4.90E-09 |
| 1951 | cg12775613 | HTR1F    | -0.15 | 2.76E-09 |
| 1952 | cg06096336 | HTR2B    | 0.10  | 1.81E-04 |
| 1953 | cg06531741 | HTR3B    | -0.14 | 1.98E-06 |
| 1954 | cg18271969 | HTR3C    | -0.18 | 1.03E-10 |
| 1955 | cg19815720 | HTR3C    | -0.19 | 1.58E-11 |
| 1956 | cg14483391 | HTR3D    | -0.11 | 1.05E-05 |
| 1957 | cg04200192 | HTR3D    | -0.25 | 6.21E-16 |
| 1958 | cg26153642 | HTR3E    | -0.14 | 1.44E-07 |
| 1959 | cg06291867 | HTR7     | 0.42  | 2.14E-24 |
| 1960 | cg09495977 | HTRA3    | 0.13  | 1.29E-04 |
| 1961 | cg14757296 | HYAL1    | -0.12 | 2.16E-24 |
| 1962 | cg00840516 | HYAL2    | 0.16  | 1.65E-13 |
| 1963 | cg15560337 | HYAL4    | -0.14 | 4.25E-07 |
| 1964 | cg09794131 | HYDIN    | 0.17  | 1.54E-07 |
| 1965 | cg20977864 | HYDIN    | 0.14  | 1.52E-08 |
| 1966 | cg24125648 | HYPK     | 0.14  | 1.27E-05 |
| 1967 | cg05434957 | ICA1     | 0.10  | 2.95E-04 |
| 1968 | cg07918509 | ICAM2    | -0.11 | 1.47E-04 |
| 1969 | cg06855803 | ICAM3    | 0.11  | 1.57E-06 |
| 1970 | cg14145194 | ICAM3    | 0.10  | 2.96E-06 |
| 1971 | cg00468146 | ID4      | 0.20  | 1.89E-07 |
| 1972 | cg14967066 | IFITM1   | 0.17  | 1.03E-05 |
| 1973 | cg11959435 | IFNA1    | -0.18 | 3.08E-17 |
| 1974 | cg01906717 | IFNA13   | -0.10 | 1.14E-09 |
| 1975 | cg21023114 | IFNA14   | -0.16 | 1.09E-15 |
| 1976 | cg01074640 | IFNA17   | -0.29 | 3.66E-22 |
| 1977 | cg07373172 | IFNA21   | -0.15 | 8.29E-12 |
| 1978 | cg19982860 | IFNA21   | -0.30 | 2.20E-24 |
| 1979 | cg23029519 | IFNA4    | -0.11 | 4.96E-11 |
| 1980 | cg15669228 | IFNA8    | -0.18 | 1.17E-19 |
| 1981 | cg05126264 | IFNB1    | -0.25 | 4.11E-25 |
| 1982 | cg26227465 | IFNG     | -0.13 | 2.16E-07 |
| 1983 | cg11390468 | IFT57    | 0.15  | 9.60E-06 |
| 1984 | cg22375192 | IGF1R    | 0.49  | 4.76E-25 |
| 1985 | cg02807948 | IGF2     | -0.12 | 5.82E-10 |
| 1986 | cg22956483 | IGF2     | -0.14 | 5.11E-06 |
| 1987 | cg13756879 | IGF2     | -0.16 | 4.60E-05 |
| 1988 | cg11005826 | IGF2AS   | -0.11 | 9.99E-05 |
| 1989 | cg04112019 | IGF2AS   | -0.13 | 3.16E-05 |
| 1990 | cg16817891 | IGF2AS   | -0.17 | 6.77E-10 |
| 1991 | cg20792294 | IGF2AS   | -0.19 | 9.28E-07 |
| 1992 | cg10501065 | IGF2AS   | -0.22 | 8.83E-11 |
| 1993 | cg06638433 | IGF2BP1  | 0.22  | 1.06E-08 |
| 1994 | cg18234011 | IGF2BP2  | 0.14  | 3.31E-04 |
| 1995 | cg01747665 | IGFALS   | 0.13  | 4.03E-08 |



|      |            |         |       |          |
|------|------------|---------|-------|----------|
| 1996 | cg05982504 | IGFALS  | -0.13 | 9.31E-06 |
| 1997 | cg22467567 | IGFBP5  | 0.10  | 1.46E-05 |
| 1998 | cg03876618 | IGFBP7  | 0.23  | 1.08E-10 |
| 1999 | cg02415431 | IPLL1   | -0.12 | 2.23E-06 |
| 2000 | cg10494770 | IPLL1   | -0.12 | 1.87E-10 |
| 2001 | cg14458615 | IGSF11  | -0.12 | 2.63E-06 |
| 2002 | cg20530056 | IKBKE   | 0.10  | 1.67E-04 |
| 2003 | cg17067005 | IL10    | -0.20 | 4.05E-11 |
| 2004 | cg01697865 | IL10RA  | -0.21 | 1.09E-13 |
| 2005 | cg26661481 | IL10RA  | -0.25 | 8.46E-14 |
| 2006 | cg27416067 | IL12RB2 | 0.29  | 8.36E-15 |
| 2007 | cg09837803 | IL16    | -0.19 | 1.02E-11 |
| 2008 | cg14366598 | IL17E   | -0.17 | 5.84E-20 |
| 2009 | cg07258507 | IL17E   | -0.27 | 3.35E-21 |
| 2010 | cg15095327 | IL17RE  | 0.12  | 2.20E-04 |
| 2011 | cg07832674 | IL17RE  | 0.10  | 1.27E-06 |
| 2012 | cg16749930 | IL18BP  | 0.16  | 2.44E-09 |
| 2013 | cg05916196 | IL19    | -0.12 | 1.15E-09 |
| 2014 | cg00839584 | IL1A    | 0.14  | 2.21E-14 |
| 2015 | cg21378206 | IL1F5   | -0.16 | 9.51E-12 |
| 2016 | cg02229946 | IL1F7   | -0.13 | 5.01E-13 |
| 2017 | cg10479672 | IL1F8   | -0.19 | 1.58E-14 |
| 2018 | cg08861115 | IL1F9   | -0.12 | 1.61E-06 |
| 2019 | cg01103730 | IL20    | -0.12 | 7.81E-05 |
| 2020 | cg04481779 | IL20RA  | 0.30  | 3.53E-18 |
| 2021 | cg22487322 | IL20RA  | 0.11  | 6.83E-11 |
| 2022 | cg02656594 | IL21R   | -0.11 | 6.54E-09 |
| 2023 | cg26333641 | IL22    | -0.23 | 1.38E-15 |
| 2024 | cg00294382 | IL23A   | 0.20  | 1.43E-16 |
| 2025 | cg06796611 | IL24    | -0.13 | 1.70E-10 |
| 2026 | cg23909633 | IL24    | -0.15 | 1.12E-10 |
| 2027 | cg17982671 | IL28B   | -0.16 | 9.10E-11 |
| 2028 | cg11270633 | IL28B   | -0.18 | 1.43E-16 |
| 2029 | cg27412902 | IL29    | -0.10 | 2.62E-07 |
| 2030 | cg26589285 | IL29    | -0.24 | 8.32E-13 |
| 2031 | cg17983064 | IL3     | -0.10 | 2.75E-07 |
| 2032 | cg11212312 | IL3     | -0.20 | 1.73E-14 |
| 2033 | cg10159529 | IL5RA   | -0.27 | 2.48E-19 |
| 2034 | cg21004129 | IL8RA   | -0.12 | 1.02E-07 |
| 2035 | cg13519373 | IL8RA   | -0.18 | 3.73E-18 |
| 2036 | cg13739417 | IL8RB   | -0.18 | 2.64E-11 |
| 2037 | cg14150666 | IL8RB   | -0.19 | 2.89E-14 |
| 2038 | cg08463485 | ILDR1   | 0.18  | 4.62E-08 |
| 2039 | cg11726593 | IMPA1   | -0.10 | 2.47E-13 |
| 2040 | cg24127989 | IMPDH1  | 0.17  | 7.77E-06 |
| 2041 | cg15740366 | IMPDH1  | 0.16  | 4.36E-05 |
| 2042 | cg26083396 | IMPDH1  | 0.15  | 7.49E-04 |
| 2043 | cg05089059 | IMPDH1  | 0.12  | 2.29E-04 |
| 2044 | cg25764191 | INA     | 0.41  | 1.97E-20 |
| 2045 | cg23642747 | INA     | 0.35  | 7.08E-20 |

|      |            |         |       |          |
|------|------------|---------|-------|----------|
| 2046 | cg25928444 | INHA    | -0.16 | 2.01E-10 |
| 2047 | cg08640498 | INHBC   | -0.10 | 1.74E-06 |
| 2048 | cg22630748 | INHBE   | -0.10 | 7.85E-05 |
| 2049 | cg02309273 | INPP5B  | 0.16  | 3.66E-06 |
| 2050 | cg10784030 | INPP5B  | 0.13  | 2.78E-06 |
| 2051 | cg18285951 | INPP5E  | 0.29  | 5.34E-09 |
| 2052 | cg03366382 | INS     | -0.18 | 4.22E-13 |
| 2053 | cg13993218 | INS     | -0.31 | 7.24E-21 |
| 2054 | cg25336198 | INS     | -0.35 | 9.17E-21 |
| 2055 | cg00613255 | INS     | -0.35 | 1.43E-18 |
| 2056 | cg01413516 | INSL3   | -0.11 | 4.22E-04 |
| 2057 | cg12067261 | INSL4   | -0.20 | 3.45E-14 |
| 2058 | cg19297688 | INSL4   | -0.21 | 1.17E-11 |
| 2059 | cg04979933 | INSL5   | -0.11 | 9.65E-08 |
| 2060 | cg07531356 | INSL6   | -0.18 | 5.32E-09 |
| 2061 | cg11830061 | INSL6   | -0.20 | 2.53E-12 |
| 2062 | cg07850604 | INSM2   | 0.30  | 1.59E-12 |
| 2063 | cg10670077 | INSR    | -0.13 | 3.42E-06 |
| 2064 | cg14940420 | IQCF2   | -0.14 | 9.49E-16 |
| 2065 | cg10691387 | IQCF2   | -0.20 | 6.54E-19 |
| 2066 | cg19418515 | IQCH    | -0.11 | 1.79E-18 |
| 2067 | cg20395892 | IRAK3   | 0.24  | 3.44E-12 |
| 2068 | cg07914866 | IRAK3   | 0.19  | 4.52E-08 |
| 2069 | cg12741420 | IRF4    | 0.27  | 5.05E-14 |
| 2070 | cg25344367 | IRGC    | -0.16 | 1.21E-13 |
| 2071 | cg15433631 | IRX2    | 0.24  | 2.99E-07 |
| 2072 | cg03963198 | IRX4    | 0.31  | 8.51E-13 |
| 2073 | cg00243313 | IRX4    | 0.19  | 4.75E-07 |
| 2074 | cg05266781 | IRX5    | 0.26  | 6.70E-11 |
| 2075 | cg05362516 | IRX5    | 0.18  | 1.50E-05 |
| 2076 | cg02161900 | IRXL1   | 0.22  | 6.24E-09 |
| 2077 | cg14614211 | IRXL1   | 0.21  | 1.61E-07 |
| 2078 | cg00392257 | ISG20L2 | -0.16 | 1.37E-07 |
| 2079 | cg02833725 | ISG20L2 | -0.16 | 1.10E-06 |
| 2080 | cg02077702 | ISLR    | -0.11 | 4.22E-05 |
| 2081 | cg11102782 | ISYNA1  | 0.44  | 2.10E-24 |
| 2082 | cg09374949 | ISYNA1  | 0.27  | 2.88E-11 |
| 2083 | cg00445824 | ISYNA1  | 0.25  | 8.73E-09 |
| 2084 | cg17749520 | ITGA2B  | -0.12 | 1.45E-10 |
| 2085 | cg10488476 | ITGA3   | 0.16  | 2.65E-05 |
| 2086 | cg25870420 | ITGA9   | 0.21  | 1.31E-07 |
| 2087 | cg02164442 | ITGAD   | -0.12 | 7.86E-05 |
| 2088 | cg24167037 | ITGB2   | -0.19 | 1.30E-08 |
| 2089 | cg19812619 | ITGB7   | -0.13 | 6.34E-10 |
| 2090 | cg17864730 | ITGB8   | 0.11  | 6.50E-05 |
| 2091 | cg03386869 | ITGBL1  | -0.13 | 2.65E-07 |
| 2092 | cg06134964 | ITIH1   | -0.15 | 9.22E-08 |
| 2093 | cg26099316 | ITIH3   | -0.10 | 3.41E-05 |
| 2094 | cg01259619 | ITPKB   | 0.11  | 2.86E-04 |
| 2095 | cg00495491 | ITPR2   | -0.13 | 1.69E-25 |

|      |            |         |       |          |
|------|------------|---------|-------|----------|
| 2096 | cg12650926 | ITPR3   | 0.15  | 7.78E-06 |
| 2097 | cg16400825 | ITPR3   | 0.12  | 3.56E-04 |
| 2098 | cg09582042 | ITR     | 0.16  | 1.21E-11 |
| 2099 | cg25082710 | IVL     | -0.14 | 8.03E-15 |
| 2100 | cg05440289 | IVL     | -0.27 | 1.90E-23 |
| 2101 | cg10234985 | IZUMO1  | 0.22  | 8.36E-15 |
| 2102 | cg01519742 | JAKMIP1 | 0.28  | 6.07E-09 |
| 2103 | cg13168683 | JAKMIP1 | 0.16  | 3.49E-06 |
| 2104 | cg03382304 | JAM2    | 0.11  | 5.82E-04 |
| 2105 | cg11344614 | JAM2    | -0.19 | 7.92E-14 |
| 2106 | cg11520395 | JMJD4   | -0.15 | 1.67E-11 |
| 2107 | cg08949296 | JPH1    | 0.13  | 1.95E-04 |
| 2108 | cg11845202 | K5B     | -0.27 | 6.96E-13 |
| 2109 | cg07265310 | K5B     | -0.29 | 3.16E-24 |
| 2110 | cg20256783 | K6HF    | -0.26 | 1.03E-21 |
| 2111 | cg17255302 | K6HF    | -0.28 | 8.98E-15 |
| 2112 | cg07017706 | K6IRS3  | -0.30 | 1.42E-20 |
| 2113 | cg13928961 | K6IRS3  | -0.33 | 6.69E-23 |
| 2114 | cg20200335 | K6IRS4  | -0.23 | 3.53E-23 |
| 2115 | cg08126211 | KAAG1   | 0.35  | 7.31E-17 |
| 2116 | cg10430690 | KALRN   | -0.10 | 1.31E-07 |
| 2117 | cg12144803 | KALRN   | -0.22 | 1.27E-11 |
| 2118 | cg16842214 | KBTBD5  | 0.14  | 1.26E-04 |
| 2119 | cg00412805 | KBTBD5  | -0.14 | 6.30E-06 |
| 2120 | cg07830847 | KCNA10  | -0.27 | 9.29E-19 |
| 2121 | cg26162582 | KCNA6   | 0.15  | 1.09E-06 |
| 2122 | cg26450866 | KCNA7   | 0.11  | 1.47E-04 |
| 2123 | cg23873703 | KCNAB1  | -0.13 | 2.92E-04 |
| 2124 | cg15423862 | KCNAB1  | -0.16 | 1.13E-07 |
| 2125 | cg19814116 | KCNAB2  | -0.17 | 5.99E-08 |
| 2126 | cg20890210 | KCNB2   | 0.13  | 1.84E-06 |
| 2127 | cg27409364 | KCNC1   | 0.38  | 2.14E-34 |
| 2128 | cg06572160 | KCNC3   | 0.30  | 5.35E-23 |
| 2129 | cg05675373 | KCNC4   | 0.41  | 7.58E-25 |
| 2130 | cg23189044 | KCNE3   | 0.17  | 5.38E-06 |
| 2131 | cg02595219 | KCNE3   | 0.12  | 9.93E-04 |
| 2132 | cg24924779 | KCNG1   | 0.20  | 2.22E-06 |
| 2133 | cg27553955 | KCNG3   | 0.28  | 1.14E-23 |
| 2134 | cg25101056 | KCNG4   | -0.19 | 7.05E-18 |
| 2135 | cg20406482 | KCNH4   | 0.18  | 1.35E-06 |
| 2136 | cg23559331 | KCNH4   | 0.14  | 7.25E-06 |
| 2137 | cg07092725 | KCNH5   | -0.21 | 1.23E-17 |
| 2138 | cg24997944 | KCNH8   | 0.10  | 1.22E-05 |
| 2139 | cg08422599 | KCNIP1  | 0.15  | 1.33E-07 |
| 2140 | cg12833011 | KCNIP1  | -0.26 | 1.93E-18 |
| 2141 | cg04997967 | KCNIP2  | 0.17  | 7.17E-05 |
| 2142 | cg14481339 | KCNJ1   | -0.19 | 1.06E-14 |
| 2143 | cg05101920 | KCNJ10  | 0.16  | 4.55E-08 |
| 2144 | cg05768141 | KCNJ10  | 0.13  | 1.22E-05 |
| 2145 | cg22642718 | KCNJ12  | -0.22 | 2.84E-18 |

|      |            |          |       |          |
|------|------------|----------|-------|----------|
| 2146 | cg18248112 | KCNJ15   | 0.11  | 2.61E-05 |
| 2147 | cg03993463 | KCNJ15   | -0.13 | 1.38E-09 |
| 2148 | cg20066612 | KCNJ9    | -0.19 | 2.97E-12 |
| 2149 | cg10935723 | KCNK10   | -0.14 | 8.66E-12 |
| 2150 | cg27320127 | KCNK12   | 0.38  | 8.06E-20 |
| 2151 | cg02136132 | KCNK13   | 0.12  | 1.69E-05 |
| 2152 | cg14948436 | KCNK16   | -0.22 | 3.56E-14 |
| 2153 | cg01669948 | KCNK16   | -0.25 | 6.18E-17 |
| 2154 | cg02611419 | KCNK17   | -0.17 | 2.78E-07 |
| 2155 | cg07637239 | KCNK18   | -0.16 | 2.71E-13 |
| 2156 | cg01643580 | KCNK3    | 0.19  | 1.10E-07 |
| 2157 | cg05782445 | KCNK3    | 0.16  | 1.49E-09 |
| 2158 | cg17834752 | KCNK9    | 0.26  | 2.35E-13 |
| 2159 | cg04688368 | KCNMA1   | 0.13  | 2.63E-05 |
| 2160 | cg01495509 | KCNMB1   | -0.10 | 2.01E-09 |
| 2161 | cg22646937 | KCNMB1   | -0.16 | 2.85E-25 |
| 2162 | cg25211252 | KCNMB3   | -0.18 | 7.10E-11 |
| 2163 | cg10778619 | KCNMB4   | 0.17  | 5.70E-06 |
| 2164 | cg04833845 | KCNN4    | -0.19 | 9.63E-17 |
| 2165 | cg19779211 | KCNQ1    | 0.34  | 1.99E-18 |
| 2166 | cg08303146 | KCNQ1    | 0.32  | 3.42E-14 |
| 2167 | cg17575811 | KCNQ1    | 0.17  | 6.60E-07 |
| 2168 | cg17820828 | KCNQ1    | -0.10 | 6.69E-03 |
| 2169 | cg01734338 | KCNQ1    | -0.11 | 7.52E-09 |
| 2170 | cg16778148 | KCNQ1    | -0.12 | 5.57E-10 |
| 2171 | cg16609872 | KCNQ1    | -0.13 | 2.21E-07 |
| 2172 | cg20751395 | KCNQ1    | -0.19 | 1.09E-09 |
| 2173 | cg04719766 | KCNQ1    | -0.19 | 2.23E-13 |
| 2174 | cg17229197 | KCNQ1    | -0.21 | 9.69E-15 |
| 2175 | cg08007665 | KCNQ1    | -0.22 | 2.53E-13 |
| 2176 | cg26879282 | KCNQ1    | -0.24 | 6.33E-16 |
| 2177 | cg26750319 | KCNQ1    | -0.28 | 1.54E-14 |
| 2178 | cg12949760 | KCNQ1    | -0.28 | 3.77E-22 |
| 2179 | cg01530101 | KCNQ1DN  | 0.12  | 1.45E-04 |
| 2180 | cg09998591 | KCNQ1DN  | -0.16 | 1.39E-08 |
| 2181 | cg18153124 | KCNQ3    | 0.11  | 1.07E-04 |
| 2182 | cg00630164 | KCNQ4    | 0.23  | 1.74E-11 |
| 2183 | cg24687051 | KCNQ5    | 0.13  | 8.76E-05 |
| 2184 | cg05373457 | KCNS2    | 0.30  | 9.17E-15 |
| 2185 | cg20673481 | KCNS3    | 0.15  | 5.32E-05 |
| 2186 | cg10539808 | KCTD1    | -0.27 | 2.59E-15 |
| 2187 | cg12280407 | KCTD12   | 0.23  | 2.53E-09 |
| 2188 | cg22229142 | KCTD17   | -0.10 | 1.91E-06 |
| 2189 | cg12300353 | KCTD8    | 0.12  | 4.85E-04 |
| 2190 | cg14323109 | KDR      | 0.12  | 4.84E-05 |
| 2191 | cg02507952 | KIAA0125 | -0.17 | 2.07E-12 |
| 2192 | cg13105904 | KIAA0323 | 0.21  | 1.09E-05 |
| 2193 | cg11880010 | KIAA0367 | -0.12 | 2.74E-06 |
| 2194 | cg18530324 | KIAA0427 | 0.14  | 1.43E-05 |
| 2195 | cg17729667 | KIAA0980 | 0.25  | 1.12E-09 |

|      |            |           |       |          |
|------|------------|-----------|-------|----------|
| 2196 | cg09088834 | KIAA0980  | 0.22  | 5.17E-09 |
| 2197 | cg10337772 | KIAA1143  | 0.12  | 2.55E-04 |
| 2198 | cg16797831 | KIAA1324  | 0.28  | 3.22E-16 |
| 2199 | cg26045220 | KIAA1324  | 0.20  | 5.97E-08 |
| 2200 | cg05730092 | KIAA1446  | -0.11 | 9.24E-06 |
| 2201 | cg09173897 | KIAA1622  | 0.14  | 9.34E-09 |
| 2202 | cg02867079 | KIAA1822  | 0.14  | 4.71E-05 |
| 2203 | cg06834875 | KIAA1822  | 0.10  | 2.42E-03 |
| 2204 | cg20582779 | KIAA1822L | -0.13 | 1.89E-06 |
| 2205 | cg18172186 | KIAA1913  | -0.23 | 5.76E-16 |
| 2206 | cg26781575 | KIAA1946  | 0.12  | 8.98E-06 |
| 2207 | cg19795898 | KIAA1984  | -0.20 | 7.56E-13 |
| 2208 | cg15613048 | KIF17     | 0.37  | 8.93E-15 |
| 2209 | cg07596494 | KIF3C     | 0.10  | 4.54E-05 |
| 2210 | cg04270799 | KIF5A     | 0.22  | 3.04E-09 |
| 2211 | cg18628483 | KIF5A     | -0.16 | 2.85E-10 |
| 2212 | cg18221897 | KIR2DL1   | -0.17 | 3.02E-17 |
| 2213 | cg22039846 | KIR2DL1   | -0.26 | 1.82E-24 |
| 2214 | cg24654350 | KIR3DL1   | -0.24 | 2.03E-17 |
| 2215 | cg15627025 | KIR3DL1   | -0.28 | 3.32E-25 |
| 2216 | cg23404467 | KIR3DL3   | -0.15 | 1.02E-08 |
| 2217 | cg11237817 | KIR3DL3   | -0.23 | 1.80E-19 |
| 2218 | cg26870566 | KIRREL    | -0.19 | 3.77E-11 |
| 2219 | cg09479015 | KIRREL2   | 0.10  | 2.18E-04 |
| 2220 | cg05606799 | KISS1     | -0.11 | 3.64E-05 |
| 2221 | cg23282559 | KL        | 0.23  | 1.10E-08 |
| 2222 | cg03883348 | KLC3      | 0.14  | 3.53E-05 |
| 2223 | cg04528819 | KLF14     | 0.28  | 6.15E-11 |
| 2224 | cg18202456 | KLF17     | -0.13 | 2.83E-10 |
| 2225 | cg26842024 | KLF2      | 0.13  | 2.59E-03 |
| 2226 | cg07309102 | KLF4      | 0.13  | 1.61E-03 |
| 2227 | cg13507429 | KLHDC7A   | -0.12 | 4.29E-08 |
| 2228 | cg18533225 | KLHDC7B   | 0.16  | 2.15E-11 |
| 2229 | cg20349377 | KLHL1     | -0.15 | 8.72E-15 |
| 2230 | cg20425130 | KLHL6     | 0.11  | 6.25E-07 |
| 2231 | cg26415633 | KLK1      | -0.10 | 4.07E-10 |
| 2232 | cg11846956 | KLK10     | 0.13  | 1.08E-04 |
| 2233 | cg08818784 | KLK10     | 0.12  | 1.04E-05 |
| 2234 | cg23894058 | KLK12     | -0.15 | 6.38E-11 |
| 2235 | cg05242523 | KLK14     | -0.13 | 1.33E-05 |
| 2236 | cg12683641 | KLK14     | -0.16 | 1.53E-15 |
| 2237 | cg04744379 | KLK15     | -0.12 | 1.19E-11 |
| 2238 | cg26149550 | KLK15     | -0.25 | 4.16E-16 |
| 2239 | cg07947016 | KLK2      | -0.21 | 1.08E-25 |
| 2240 | cg17687962 | KLK3      | -0.26 | 7.30E-19 |
| 2241 | cg10078829 | KLK4      | -0.15 | 1.22E-14 |
| 2242 | cg15096123 | KLK4      | -0.22 | 8.88E-16 |
| 2243 | cg04349727 | KLK5      | -0.19 | 8.92E-16 |
| 2244 | cg27583102 | KLK5      | -0.21 | 5.05E-11 |
| 2245 | cg21256656 | KLK6      | -0.25 | 1.13E-16 |

|      |            |           |       |          |
|------|------------|-----------|-------|----------|
| 2246 | cg18967533 | KLK6      | -0.25 | 5.78E-21 |
| 2247 | cg01144251 | KLK9      | -0.25 | 4.93E-20 |
| 2248 | cg22468123 | KLP1      | 0.17  | 2.13E-04 |
| 2249 | cg20047055 | KLRC1     | -0.23 | 2.09E-19 |
| 2250 | cg21474838 | KLRD1     | -0.19 | 4.21E-12 |
| 2251 | cg17405586 | KRT1      | -0.21 | 1.48E-23 |
| 2252 | cg02756698 | KRT12     | -0.15 | 9.99E-06 |
| 2253 | cg10742225 | KRT13     | -0.11 | 1.28E-10 |
| 2254 | cg13350783 | KRT13     | -0.30 | 6.11E-19 |
| 2255 | cg11068096 | KRT14     | -0.20 | 7.81E-21 |
| 2256 | cg01602596 | KRT14     | -0.21 | 1.52E-16 |
| 2257 | cg11983245 | KRT15     | -0.25 | 3.04E-16 |
| 2258 | cg23128056 | KRT15     | -0.28 | 1.58E-17 |
| 2259 | cg24457403 | KRT16     | -0.17 | 8.54E-07 |
| 2260 | cg27478659 | KRT16     | -0.27 | 4.30E-24 |
| 2261 | cg00214794 | KRT17     | -0.15 | 8.39E-20 |
| 2262 | cg18982568 | KRT1B     | -0.16 | 5.17E-13 |
| 2263 | cg05921581 | KRT1B     | -0.20 | 8.91E-13 |
| 2264 | cg25124433 | KRT20     | -0.17 | 2.70E-10 |
| 2265 | cg18901980 | KRT25A    | -0.29 | 1.31E-18 |
| 2266 | cg22983092 | KRT25A    | -0.30 | 2.47E-17 |
| 2267 | cg04484789 | KRT25B    | -0.22 | 1.20E-19 |
| 2268 | cg16488522 | KRT25C    | -0.15 | 2.28E-12 |
| 2269 | cg10173723 | KRT25C    | -0.20 | 2.32E-14 |
| 2270 | cg00463848 | KRT2A     | -0.23 | 7.39E-22 |
| 2271 | cg16405957 | KRT2A     | -0.25 | 2.69E-16 |
| 2272 | cg20862119 | KRT2B     | -0.27 | 3.49E-15 |
| 2273 | cg11465372 | KRT2B     | -0.31 | 7.49E-18 |
| 2274 | cg12610744 | KRT4      | -0.12 | 9.79E-11 |
| 2275 | cg17667972 | KRT4      | -0.13 | 4.57E-05 |
| 2276 | cg23645091 | KRT5      | -0.24 | 5.05E-14 |
| 2277 | cg04254916 | KRT5      | -0.29 | 2.87E-17 |
| 2278 | cg11471401 | KRT6A     | -0.16 | 4.94E-13 |
| 2279 | cg12795208 | KRT6B     | -0.22 | 3.94E-14 |
| 2280 | cg13181284 | KRT6B     | -0.30 | 8.29E-20 |
| 2281 | cg16112157 | KRT6C     | -0.14 | 2.44E-12 |
| 2282 | cg00213044 | KRT6C     | -0.24 | 4.62E-23 |
| 2283 | cg08136806 | KRT6E     | -0.10 | 1.92E-06 |
| 2284 | cg26577529 | KRT6E     | -0.17 | 1.70E-10 |
| 2285 | cg01853981 | KRT6IRS   | -0.21 | 1.31E-16 |
| 2286 | cg23767977 | KRT6IRS   | -0.28 | 5.67E-17 |
| 2287 | cg23696712 | KRT6L     | -0.27 | 4.64E-16 |
| 2288 | cg09522147 | KRT7      | 0.12  | 2.17E-04 |
| 2289 | cg07007400 | KRT7      | 0.11  | 6.62E-05 |
| 2290 | cg10328573 | KRT9      | -0.19 | 1.44E-15 |
| 2291 | cg02784874 | KRT9      | -0.28 | 4.50E-25 |
| 2292 | cg17778867 | KRTAP10-8 | -0.11 | 1.67E-09 |
| 2293 | cg07014174 | KRTAP11-1 | -0.18 | 1.35E-15 |
| 2294 | cg27071517 | KRTAP13-1 | -0.27 | 2.31E-23 |
| 2295 | cg16431978 | KRTAP13-3 | -0.20 | 2.71E-23 |

|      |            |           |       |          |
|------|------------|-----------|-------|----------|
| 2296 | cg14062083 | KRTAP13-4 | -0.21 | 5.67E-19 |
| 2297 | cg15606663 | KRTAP15-1 | -0.19 | 4.17E-22 |
| 2298 | cg16812893 | KRTAP15-1 | -0.32 | 3.83E-29 |
| 2299 | cg26499286 | KRTAP17-1 | -0.11 | 1.68E-13 |
| 2300 | cg16242770 | KRTAP17-1 | -0.26 | 3.45E-15 |
| 2301 | cg04297093 | KRTAP19-3 | -0.20 | 1.74E-10 |
| 2302 | cg06748315 | KRTAP19-3 | -0.20 | 6.43E-17 |
| 2303 | cg07374637 | KRTAP19-5 | -0.25 | 1.11E-17 |
| 2304 | cg06324671 | KRTAP19-7 | -0.25 | 1.19E-17 |
| 2305 | cg26565975 | KRTAP20-1 | -0.26 | 1.13E-15 |
| 2306 | cg06222800 | KRTAP21-1 | -0.15 | 1.06E-14 |
| 2307 | cg27456885 | KRTAP22-1 | -0.13 | 5.20E-12 |
| 2308 | cg23205633 | KRTAP4-2  | -0.25 | 5.47E-15 |
| 2309 | cg14087150 | KRTAP4-4  | -0.22 | 2.01E-19 |
| 2310 | cg03029616 | KRTAP6-1  | -0.27 | 3.08E-19 |
| 2311 | cg19306866 | KRTAP6-2  | -0.23 | 1.99E-19 |
| 2312 | cg24423088 | KRTAP8-1  | -0.35 | 1.01E-19 |
| 2313 | cg11710560 | KRTAP9-3  | -0.28 | 5.84E-20 |
| 2314 | cg11618577 | KRTCAP3   | 0.24  | 2.90E-22 |
| 2315 | cg00063144 | KRTHA1    | -0.26 | 2.78E-15 |
| 2316 | cg21230133 | KRTHA1    | -0.36 | 2.38E-24 |
| 2317 | cg08611714 | KRTHA2    | -0.27 | 1.43E-23 |
| 2318 | cg23674788 | KRTHA2    | -0.34 | 8.55E-24 |
| 2319 | cg18370227 | KRTHA3A   | -0.29 | 4.23E-16 |
| 2320 | cg15983005 | KRTHA3A   | -0.38 | 3.97E-25 |
| 2321 | cg02580606 | KRTHA3B   | -0.28 | 1.07E-20 |
| 2322 | cg14533138 | KRTHA3B   | -0.39 | 1.23E-26 |
| 2323 | cg06074920 | KRTHA4    | -0.17 | 4.29E-10 |
| 2324 | cg25545210 | KRTHA4    | -0.38 | 7.42E-26 |
| 2325 | cg00384537 | KRTHA5    | -0.15 | 3.78E-12 |
| 2326 | cg09538582 | KRTHA5    | -0.20 | 7.65E-16 |
| 2327 | cg02780988 | KRTHA6    | -0.26 | 2.39E-21 |
| 2328 | cg04618528 | KRTHA6    | -0.30 | 4.13E-18 |
| 2329 | cg22139563 | KRTHA8    | -0.12 | 1.41E-08 |
| 2330 | cg13696887 | KRTHB2    | -0.17 | 1.29E-09 |
| 2331 | cg24926042 | KRTHB2    | -0.23 | 3.00E-15 |
| 2332 | cg19258973 | KRTHB3    | -0.24 | 1.76E-16 |
| 2333 | cg16791508 | KRTHB3    | -0.26 | 6.66E-18 |
| 2334 | cg18153060 | KRTHB4    | -0.27 | 8.18E-17 |
| 2335 | cg24461814 | KRTHB4    | -0.30 | 3.66E-16 |
| 2336 | cg06132342 | KRTHB5    | -0.26 | 6.71E-18 |
| 2337 | cg21518208 | KRTHB5    | -0.30 | 1.49E-19 |
| 2338 | cg16911220 | KRTHB6    | -0.12 | 9.78E-09 |
| 2339 | cg07643942 | LACRT     | -0.13 | 1.69E-09 |
| 2340 | cg10125195 | LACRT     | -0.25 | 7.08E-20 |
| 2341 | cg00616135 | LACTB     | 0.11  | 4.34E-05 |
| 2342 | cg26956535 | LAG3      | 0.10  | 1.10E-07 |
| 2343 | cg06238491 | LAIR1     | -0.10 | 4.22E-04 |
| 2344 | cg20320468 | LAIR1     | -0.21 | 3.26E-16 |
| 2345 | cg04000821 | LAIR2     | -0.17 | 4.32E-17 |

|      |            |          |       |          |
|------|------------|----------|-------|----------|
| 2346 | cg00269932 | LAIR2    | -0.26 | 1.93E-16 |
| 2347 | cg01726767 | LALBA    | -0.16 | 7.18E-11 |
| 2348 | cg14338548 | LALBA    | -0.25 | 1.84E-15 |
| 2349 | cg07846220 | LAMA1    | 0.23  | 9.62E-06 |
| 2350 | cg23696949 | LAMC2    | 0.21  | 6.90E-09 |
| 2351 | cg26491484 | LAMC3    | -0.17 | 8.04E-09 |
| 2352 | cg12732155 | LAPTM5   | -0.11 | 1.50E-03 |
| 2353 | cg01318557 | LAT2     | -0.27 | 3.38E-10 |
| 2354 | cg12022621 | LAX1     | -0.16 | 1.41E-14 |
| 2355 | cg14696820 | LCE1A    | -0.23 | 9.18E-22 |
| 2356 | cg21434954 | LCE1B    | -0.23 | 5.60E-21 |
| 2357 | cg08878744 | LCE1B    | -0.27 | 9.33E-27 |
| 2358 | cg24304714 | LCE1C    | -0.13 | 2.09E-17 |
| 2359 | cg15531099 | LCE1D    | -0.28 | 6.94E-26 |
| 2360 | cg21065959 | LCE1E    | -0.22 | 1.04E-20 |
| 2361 | cg23413307 | LCE1F    | -0.34 | 5.83E-25 |
| 2362 | cg25098401 | LCE2B    | -0.19 | 1.93E-21 |
| 2363 | cg03960217 | LCE2C    | -0.20 | 6.38E-24 |
| 2364 | cg21312148 | LCE2D    | -0.15 | 1.59E-08 |
| 2365 | cg26135325 | LCE3A    | -0.14 | 7.32E-07 |
| 2366 | cg03741352 | LCE3C    | -0.26 | 1.47E-21 |
| 2367 | cg20676475 | LCE3D    | -0.16 | 1.57E-12 |
| 2368 | cg23110514 | LCE3E    | -0.11 | 4.03E-08 |
| 2369 | cg21846488 | LCE4A    | -0.23 | 6.67E-18 |
| 2370 | cg05248781 | LCE5A    | -0.34 | 1.79E-17 |
| 2371 | cg10248727 | LCN1     | -0.20 | 6.52E-21 |
| 2372 | cg23815000 | LCN1     | -0.25 | 8.96E-16 |
| 2373 | cg11873854 | LCN6     | -0.15 | 6.48E-15 |
| 2374 | cg17127769 | LCP2     | -0.11 | 2.59E-05 |
| 2375 | cg03368758 | LDB2     | -0.11 | 1.93E-05 |
| 2376 | cg12008118 | LDB3     | -0.12 | 7.46E-10 |
| 2377 | cg14813083 | LDHAL6A  | 0.12  | 1.50E-05 |
| 2378 | cg07915343 | LDHAL6A  | 0.11  | 4.79E-09 |
| 2379 | cg06437004 | LDHB     | 0.49  | 5.31E-32 |
| 2380 | cg03243946 | LDHB     | 0.34  | 2.22E-15 |
| 2381 | cg08418111 | LDHC     | 0.13  | 7.46E-06 |
| 2382 | cg20661303 | LEFTY2   | -0.17 | 2.13E-13 |
| 2383 | cg12782180 | LEP      | 0.25  | 3.57E-14 |
| 2384 | cg19594666 | LEP      | 0.11  | 1.81E-03 |
| 2385 | cg20270599 | LEPREL1  | 0.11  | 4.05E-05 |
| 2386 | cg08958913 | LGALS14  | -0.11 | 2.20E-10 |
| 2387 | cg01192952 | LGALS14  | -0.15 | 2.75E-11 |
| 2388 | cg19099850 | LGALS3   | 0.45  | 2.17E-15 |
| 2389 | cg17403875 | LGALS3   | 0.41  | 2.97E-14 |
| 2390 | cg14870271 | LGALS3BP | 0.12  | 3.46E-05 |
| 2391 | cg11105610 | LGALS3BP | 0.12  | 4.82E-08 |
| 2392 | cg06394229 | LGALS4   | -0.12 | 6.40E-05 |
| 2393 | cg00532335 | LGI1     | -0.18 | 2.20E-14 |
| 2394 | cg04833050 | LHFPL2   | 0.11  | 1.41E-03 |
| 2395 | cg22660578 | LHX1     | 0.28  | 2.59E-13 |



|      |            |           |       |          |
|------|------------|-----------|-------|----------|
| 2396 | cg07109287 | LHX2      | 0.10  | 2.13E-02 |
| 2397 | cg20300246 | LHX3      | 0.16  | 1.03E-05 |
| 2398 | cg25680829 | LHX4      | 0.14  | 7.76E-06 |
| 2399 | cg06866657 | LHX6      | 0.16  | 1.27E-08 |
| 2400 | cg19539004 | LIF       | -0.14 | 2.61E-09 |
| 2401 | cg01796228 | LIFR      | -0.21 | 1.67E-18 |
| 2402 | cg25384595 | LILRA1    | -0.22 | 2.63E-24 |
| 2403 | cg19486673 | LILRA2    | -0.18 | 1.61E-16 |
| 2404 | cg00705255 | LILRA3    | -0.15 | 1.88E-30 |
| 2405 | cg13733733 | LILRA3    | -0.23 | 8.49E-16 |
| 2406 | cg20542190 | LILRA4    | -0.12 | 2.79E-18 |
| 2407 | cg01204985 | LILRA4    | -0.26 | 2.76E-16 |
| 2408 | cg06392096 | LILRA5    | -0.12 | 7.73E-30 |
| 2409 | cg00727947 | LILRA5    | -0.26 | 2.19E-18 |
| 2410 | cg05248470 | LILRB2    | -0.11 | 1.13E-09 |
| 2411 | cg22456522 | LILRB3    | -0.20 | 2.57E-16 |
| 2412 | cg00113020 | LILRB4    | -0.14 | 2.02E-09 |
| 2413 | cg05922591 | LILRB4    | -0.26 | 3.82E-15 |
| 2414 | cg20649991 | LILRB5    | -0.27 | 8.01E-19 |
| 2415 | cg08684473 | LILRB5    | -0.29 | 8.92E-18 |
| 2416 | cg02988947 | LIMD2     | 0.19  | 1.80E-13 |
| 2417 | cg05592398 | LIMK1     | 0.18  | 1.16E-08 |
| 2418 | cg00585790 | LIMS1     | 0.15  | 3.45E-10 |
| 2419 | cg01733599 | LIPC      | -0.11 | 5.03E-06 |
| 2420 | cg24447890 | LMAN1L    | -0.10 | 9.20E-06 |
| 2421 | cg11822932 | LMO2      | -0.10 | 1.27E-06 |
| 2422 | cg09358725 | LMO2      | -0.11 | 4.12E-06 |
| 2423 | cg22227965 | LMO7      | -0.11 | 3.18E-10 |
| 2424 | cg09636671 | LMOD1     | 0.20  | 1.09E-06 |
| 2425 | cg09404633 | LMOD1     | 0.11  | 1.24E-03 |
| 2426 | cg24650501 | LMX1A     | 0.10  | 1.88E-05 |
| 2427 | cg25999867 | LOC112937 | 0.15  | 1.94E-06 |
| 2428 | cg19674669 | LOC112937 | 0.11  | 7.94E-04 |
| 2429 | cg02718531 | LOC114984 | 0.16  | 3.06E-05 |
| 2430 | cg24272559 | LOC116123 | -0.19 | 1.94E-11 |
| 2431 | cg07580827 | LOC120379 | -0.11 | 4.03E-10 |
| 2432 | cg21624282 | LOC122258 | -0.17 | 1.77E-12 |
| 2433 | cg05461841 | LOC124220 | -0.14 | 9.80E-14 |
| 2434 | cg26259865 | LOC124220 | -0.19 | 3.79E-12 |
| 2435 | cg26687173 | LOC126248 | 0.12  | 3.35E-18 |
| 2436 | cg05719902 | LOC136306 | 0.17  | 3.54E-13 |
| 2437 | cg24506604 | LOC144501 | -0.14 | 1.58E-07 |
| 2438 | cg15660498 | LOC148137 | 0.11  | 2.09E-04 |
| 2439 | cg14681629 | LOC153684 | 0.10  | 3.72E-05 |
| 2440 | cg06186808 | LOC161247 | 0.22  | 3.61E-16 |
| 2441 | cg17561452 | LOC161931 | -0.17 | 2.36E-13 |
| 2442 | cg07595943 | LOC161931 | -0.23 | 1.08E-13 |
| 2443 | cg11456838 | LOC202459 | -0.17 | 2.80E-12 |
| 2444 | cg25650811 | LOC223075 | -0.13 | 6.85E-13 |
| 2445 | cg04992673 | LOC253012 | -0.24 | 6.92E-13 |

|      |            |           |       |          |
|------|------------|-----------|-------|----------|
| 2446 | cg11608424 | LOC253012 | -0.24 | 1.48E-13 |
| 2447 | cg22131172 | LOC283487 | -0.16 | 2.08E-10 |
| 2448 | cg01605783 | LOC284837 | -0.15 | 2.97E-08 |
| 2449 | cg00546897 | LOC284837 | -0.26 | 1.19E-16 |
| 2450 | cg16983159 | LOC340061 | 0.16  | 1.39E-08 |
| 2451 | cg07434382 | LOC348174 | -0.17 | 4.30E-19 |
| 2452 | cg15149938 | LOC348645 | -0.17 | 7.37E-11 |
| 2453 | cg01870826 | LOC389458 | 0.35  | 5.24E-18 |
| 2454 | cg18401406 | LOC400120 | -0.17 | 4.15E-08 |
| 2455 | cg00881370 | LOC55908  | 0.17  | 2.99E-07 |
| 2456 | cg15309006 | LOC63928  | 0.15  | 1.07E-04 |
| 2457 | cg27011193 | LOC654342 | 0.12  | 9.48E-12 |
| 2458 | cg11012046 | LOC89944  | 0.26  | 4.95E-12 |
| 2459 | cg11781389 | LOC89944  | 0.22  | 4.66E-12 |
| 2460 | cg17761453 | LOR       | -0.24 | 1.00E-15 |
| 2461 | cg27626424 | LOR       | -0.31 | 2.18E-20 |
| 2462 | cg02548238 | LOX       | 0.17  | 4.42E-05 |
| 2463 | cg22836153 | LOX       | 0.10  | 2.54E-04 |
| 2464 | cg08918749 | LPL       | 0.11  | 1.33E-03 |
| 2465 | cg24489015 | LPO       | -0.15 | 1.92E-12 |
| 2466 | cg20654468 | LPXN      | 0.26  | 7.19E-18 |
| 2467 | cg23587449 | LRAT      | 0.19  | 4.35E-08 |
| 2468 | cg23303074 | LRAT      | 0.13  | 7.05E-06 |
| 2469 | cg20580177 | LRFN3     | -0.13 | 2.12E-05 |
| 2470 | cg20358834 | LRFN4     | 0.35  | 5.23E-14 |
| 2471 | cg08700306 | LRP3      | -0.11 | 5.64E-06 |
| 2472 | cg25201363 | LRPAP1    | 0.12  | 1.11E-07 |
| 2473 | cg02121427 | LRRC15    | -0.12 | 8.46E-09 |
| 2474 | cg26838900 | LRRC15    | -0.25 | 1.32E-15 |
| 2475 | cg20442697 | LRRC17    | 0.12  | 8.97E-12 |
| 2476 | cg07514381 | LRRC2     | -0.16 | 6.99E-13 |
| 2477 | cg17833578 | LRRC21    | -0.12 | 6.89E-10 |
| 2478 | cg17827767 | LRRC21    | -0.27 | 4.01E-23 |
| 2479 | cg23089840 | LRRC3     | 0.17  | 3.86E-11 |
| 2480 | cg09610963 | LRRC37A   | -0.11 | 6.10E-20 |
| 2481 | cg18020749 | LRRC37A   | -0.13 | 1.33E-16 |
| 2482 | cg15087147 | LRRC4     | 0.18  | 9.78E-14 |
| 2483 | cg10576828 | LRRC7     | -0.25 | 2.56E-18 |
| 2484 | cg21401794 | LRRC8C    | 0.13  | 1.01E-04 |
| 2485 | cg16456919 | LRRN5     | -0.11 | 1.80E-03 |
| 2486 | cg01909245 | LSP1      | -0.20 | 9.92E-12 |
| 2487 | cg26158194 | LSP1      | -0.23 | 1.05E-11 |
| 2488 | cg14324675 | LST1      | -0.17 | 7.53E-09 |
| 2489 | cg17709873 | LTA       | -0.20 | 6.91E-13 |
| 2490 | cg20542800 | LTB4R     | 0.10  | 1.76E-04 |
| 2491 | cg15784615 | LTBR      | -0.11 | 3.61E-04 |
| 2492 | cg11394785 | LTC4S     | 0.13  | 4.72E-08 |
| 2493 | cg16361890 | LTC4S     | 0.11  | 6.50E-09 |
| 2494 | cg15261665 | LTF       | 0.12  | 1.13E-04 |
| 2495 | cg27494383 | LTK       | 0.19  | 3.73E-10 |

|      |            |          |       |          |
|------|------------|----------|-------|----------|
| 2496 | cg07654934 | LXN      | 0.28  | 4.75E-20 |
| 2497 | cg08263647 | LXN      | 0.16  | 2.73E-16 |
| 2498 | cg07572435 | LY6D     | -0.27 | 2.33E-20 |
| 2499 | cg05800321 | LY6D     | -0.28 | 3.10E-18 |
| 2500 | cg27557796 | LY6G6C   | -0.16 | 3.76E-09 |
| 2501 | cg10107725 | LY75     | 0.18  | 3.37E-10 |
| 2502 | cg23995753 | LY75     | 0.14  | 3.19E-04 |
| 2503 | cg02212836 | LY86     | -0.17 | 3.02E-07 |
| 2504 | cg01367992 | LY9      | -0.15 | 5.42E-10 |
| 2505 | cg18920397 | LY9      | -0.22 | 1.94E-10 |
| 2506 | cg23180489 | LYNX1    | 0.18  | 2.29E-13 |
| 2507 | cg04311964 | LYPD2    | -0.13 | 3.25E-11 |
| 2508 | cg15014458 | LYPD3    | 0.33  | 1.98E-30 |
| 2509 | cg25340403 | LYPD3    | 0.21  | 1.50E-26 |
| 2510 | cg24116028 | LYPD4    | -0.14 | 1.07E-09 |
| 2511 | cg21044104 | LYZL4    | -0.27 | 6.87E-19 |
| 2512 | cg16826286 | LYZL6    | -0.19 | 9.62E-13 |
| 2513 | cg26917999 | LZTS1    | -0.18 | 3.41E-10 |
| 2514 | cg08385610 | LZTS1    | -0.23 | 1.46E-15 |
| 2515 | cg12029639 | MAB21L1  | -0.15 | 2.43E-11 |
| 2516 | cg05093686 | MAB21L1  | -0.23 | 8.10E-15 |
| 2517 | cg22233974 | MACF1    | 0.11  | 2.79E-10 |
| 2518 | cg26365553 | MADD     | 0.15  | 1.36E-03 |
| 2519 | cg02497758 | MAFB     | -0.13 | 7.68E-11 |
| 2520 | cg14535518 | MAG      | -0.15 | 1.36E-14 |
| 2521 | cg05055150 | MAG      | -0.15 | 5.45E-10 |
| 2522 | cg01678091 | MAGEL2   | -0.14 | 3.46E-08 |
| 2523 | cg02982734 | MAGEL2   | -0.14 | 6.70E-12 |
| 2524 | cg04014889 | MAGEL2   | -0.16 | 3.98E-10 |
| 2525 | cg21325760 | MAGEL2   | -0.17 | 2.90E-11 |
| 2526 | cg20537629 | MAGI2    | 0.12  | 4.32E-05 |
| 2527 | cg01615704 | MALL     | 0.15  | 6.24E-05 |
| 2528 | cg08880153 | MAP1A    | -0.20 | 5.28E-13 |
| 2529 | cg07380496 | MAP1B    | 0.29  | 1.07E-12 |
| 2530 | cg02001410 | MAP1B    | 0.17  | 1.59E-08 |
| 2531 | cg19601328 | MAP3K14  | 0.14  | 7.07E-13 |
| 2532 | cg15639951 | MAP3K14  | 0.14  | 2.05E-04 |
| 2533 | cg00233307 | MAP4K1   | 0.22  | 4.64E-09 |
| 2534 | cg15679651 | MAP4K1   | 0.21  | 4.21E-12 |
| 2535 | cg12727374 | MAP6D1   | 0.45  | 1.11E-20 |
| 2536 | cg03705396 | MAP6D1   | 0.43  | 3.93E-26 |
| 2537 | cg24155668 | MAPK13   | 0.13  | 1.63E-04 |
| 2538 | cg22892110 | MAPK15   | 0.40  | 1.39E-23 |
| 2539 | cg03568064 | MAPK8IP1 | 0.26  | 9.17E-08 |
| 2540 | cg17271365 | MARCH1   | -0.20 | 5.63E-21 |
| 2541 | cg07259382 | MARCH1   | -0.22 | 1.79E-17 |
| 2542 | cg25842356 | MARCH3   | 0.14  | 1.06E-11 |
| 2543 | cg11009736 | MARCO    | -0.18 | 1.77E-18 |
| 2544 | cg02431964 | MARCO    | -0.28 | 2.44E-19 |
| 2545 | cg24063382 | MAS1L    | -0.21 | 7.64E-20 |

|      |            |          |       |          |
|------|------------|----------|-------|----------|
| 2546 | cg21831174 | MASP1    | 0.14  | 2.44E-14 |
| 2547 | cg13833831 | MATK     | -0.17 | 3.46E-09 |
| 2548 | cg10039928 | MATN2    | -0.10 | 4.70E-07 |
| 2549 | cg14448104 | MATN4    | -0.18 | 4.80E-09 |
| 2550 | cg27418851 | MBL2     | -0.12 | 3.40E-07 |
| 2551 | cg12555907 | MBP      | 0.12  | 2.71E-08 |
| 2552 | cg11564670 | MC2R     | -0.20 | 1.49E-15 |
| 2553 | cg19226099 | MC3R     | -0.26 | 1.08E-20 |
| 2554 | cg02037013 | MC4R     | -0.19 | 8.87E-15 |
| 2555 | cg21096399 | MCAM     | 0.16  | 3.10E-05 |
| 2556 | cg03365354 | MCAM     | 0.13  | 5.99E-04 |
| 2557 | cg11668844 | MCF2L    | 0.12  | 1.49E-04 |
| 2558 | cg27239157 | MCF2L2   | 0.25  | 1.77E-12 |
| 2559 | cg23752923 | MCOLN3   | 0.14  | 2.16E-07 |
| 2560 | cg08223748 | MEF2C    | 0.11  | 7.21E-06 |
| 2561 | cg21514871 | MEFV     | 0.14  | 4.55E-08 |
| 2562 | cg02490034 | MEST     | -0.11 | 1.25E-07 |
| 2563 | cg08077673 | MEST     | -0.11 | 2.33E-06 |
| 2564 | cg09872616 | MEST     | -0.11 | 4.39E-08 |
| 2565 | cg09059945 | MEST     | -0.11 | 2.83E-10 |
| 2566 | cg01888566 | MEST     | -0.15 | 2.05E-08 |
| 2567 | cg11027330 | METRNL   | 0.13  | 1.28E-05 |
| 2568 | cg08477744 | MFAP2    | -0.13 | 1.56E-10 |
| 2569 | cg13030582 | MFAP4    | 0.10  | 1.50E-05 |
| 2570 | cg06256735 | MFAP5    | -0.19 | 1.95E-16 |
| 2571 | cg15815843 | MFAP5    | -0.27 | 1.31E-20 |
| 2572 | cg18452324 | MFNG     | 0.12  | 4.70E-04 |
| 2573 | cg15075718 | MFRP     | -0.16 | 6.25E-07 |
| 2574 | cg19560971 | MFRP     | -0.16 | 1.41E-15 |
| 2575 | cg17952262 | MFSD7    | 0.22  | 2.52E-13 |
| 2576 | cg24693053 | MFSD7    | 0.20  | 2.71E-14 |
| 2577 | cg18971054 | MGAM     | -0.26 | 4.62E-13 |
| 2578 | cg18344063 | MGAT4C   | -0.18 | 7.55E-13 |
| 2579 | cg03862760 | MGC10911 | -0.14 | 1.07E-16 |
| 2580 | cg20687462 | MGC10992 | 0.11  | 1.56E-04 |
| 2581 | cg12108912 | MGC10993 | -0.18 | 5.52E-14 |
| 2582 | cg05937237 | MGC11257 | -0.10 | 2.20E-10 |
| 2583 | cg26608667 | MGC11257 | -0.14 | 3.42E-09 |
| 2584 | cg21517055 | MGC11271 | 0.15  | 4.04E-06 |
| 2585 | cg12960248 | MGC11335 | 0.12  | 1.71E-07 |
| 2586 | cg05731779 | MGC13034 | -0.19 | 1.60E-12 |
| 2587 | cg15905124 | MGC13034 | -0.24 | 5.68E-19 |
| 2588 | cg20346726 | MGC13040 | 0.14  | 2.16E-06 |
| 2589 | cg00202702 | MGC13040 | 0.10  | 5.92E-05 |
| 2590 | cg18798750 | MGC14289 | 0.29  | 1.02E-10 |
| 2591 | cg00042156 | MGC16291 | -0.18 | 1.57E-09 |
| 2592 | cg04726446 | MGC16372 | 0.42  | 6.99E-26 |
| 2593 | cg10883621 | MGC16372 | 0.34  | 6.70E-23 |
| 2594 | cg11277230 | MGC26744 | 0.11  | 7.63E-05 |
| 2595 | cg21087137 | MGC26856 | 0.11  | 6.07E-06 |

|      |            |          |       |          |
|------|------------|----------|-------|----------|
| 2596 | cg22496683 | MGC27016 | -0.12 | 2.99E-05 |
| 2597 | cg02992596 | MGC27016 | -0.26 | 5.73E-15 |
| 2598 | cg26790059 | MGC27121 | -0.11 | 1.66E-05 |
| 2599 | cg18750756 | MGC29671 | -0.21 | 2.20E-10 |
| 2600 | cg01138020 | MGC29671 | -0.23 | 2.68E-13 |
| 2601 | cg04731384 | MGC3101  | -0.23 | 6.51E-15 |
| 2602 | cg12452946 | MGC33302 | 0.11  | 4.56E-11 |
| 2603 | cg15557833 | MGC33302 | 0.10  | 2.27E-09 |
| 2604 | cg24642468 | MGC33367 | -0.18 | 1.37E-17 |
| 2605 | cg07804582 | MGC33367 | -0.19 | 2.07E-11 |
| 2606 | cg18931750 | MGC33407 | -0.12 | 1.40E-07 |
| 2607 | cg00775197 | MGC33600 | 0.12  | 1.14E-05 |
| 2608 | cg21553524 | MGC33926 | 0.15  | 1.72E-05 |
| 2609 | cg19540408 | MGC35154 | -0.14 | 1.35E-15 |
| 2610 | cg11784281 | MGC35154 | -0.17 | 1.09E-12 |
| 2611 | cg14074117 | MGC35212 | -0.11 | 4.66E-06 |
| 2612 | cg25072962 | MGC35295 | -0.22 | 3.30E-22 |
| 2613 | cg23499129 | MGC35308 | 0.22  | 6.03E-10 |
| 2614 | cg10261191 | MGC39545 | 0.12  | 4.98E-12 |
| 2615 | cg15658426 | MGC39633 | 0.19  | 2.99E-12 |
| 2616 | cg24400943 | MGC39681 | -0.18 | 7.80E-11 |
| 2617 | cg07484450 | MGC39681 | -0.22 | 8.51E-13 |
| 2618 | cg24546463 | MGC39715 | 0.21  | 6.63E-11 |
| 2619 | cg17199658 | MGC39715 | 0.16  | 1.09E-08 |
| 2620 | cg23502772 | MGC42105 | 0.24  | 1.57E-09 |
| 2621 | cg05174079 | MGC42630 | -0.15 | 4.01E-15 |
| 2622 | cg22543128 | MGC42630 | -0.19 | 4.89E-16 |
| 2623 | cg14759043 | MGC4266  | 0.13  | 2.03E-03 |
| 2624 | cg06154597 | MGC4618  | -0.18 | 6.11E-11 |
| 2625 | cg00448720 | MGC48915 | -0.14 | 1.01E-07 |
| 2626 | cg12594641 | MGC52057 | -0.11 | 5.71E-08 |
| 2627 | cg14086122 | MGC7036  | -0.14 | 2.28E-08 |
| 2628 | cg00411097 | MGC9712  | -0.12 | 5.40E-10 |
| 2629 | cg06194808 | MGC9712  | -0.16 | 9.90E-08 |
| 2630 | cg20377673 | MIF      | 0.12  | 2.00E-03 |
| 2631 | cg06534422 | MIF      | 0.12  | 8.56E-03 |
| 2632 | cg15147516 | MIXL1    | 0.42  | 2.20E-20 |
| 2633 | cg18354264 | MIXL1    | 0.12  | 7.56E-05 |
| 2634 | cg21030400 | MKNK2    | 0.22  | 8.91E-16 |
| 2635 | cg20769842 | MKRN3    | -0.12 | 8.51E-10 |
| 2636 | cg23234999 | MKRN3    | -0.20 | 2.65E-15 |
| 2637 | cg03969797 | MKRN3    | -0.20 | 2.17E-14 |
| 2638 | cg17169998 | MLC1     | -0.15 | 7.16E-07 |
| 2639 | cg20182358 | MLF1     | 0.31  | 1.49E-17 |
| 2640 | cg20226764 | MLN      | -0.17 | 4.22E-13 |
| 2641 | cg08332212 | MLN      | -0.19 | 6.07E-10 |
| 2642 | cg07935568 | MLNR     | 0.40  | 1.30E-17 |
| 2643 | cg02620013 | MLNR     | 0.34  | 1.43E-21 |
| 2644 | cg14026971 | MLSTD2   | 0.22  | 1.14E-08 |
| 2645 | cg24243265 | MLZE     | -0.16 | 1.14E-10 |

|      |            |         |       |          |
|------|------------|---------|-------|----------|
| 2646 | cg16575408 | MMP1    | -0.19 | 6.61E-10 |
| 2647 | cg10599444 | MMP14   | -0.11 | 1.92E-05 |
| 2648 | cg26705553 | MMP25   | 0.16  | 3.85E-07 |
| 2649 | cg12493906 | MMP26   | -0.35 | 4.10E-32 |
| 2650 | cg06259570 | MMP27   | -0.11 | 1.59E-06 |
| 2651 | cg18113270 | MMP3    | -0.18 | 1.03E-08 |
| 2652 | cg20925811 | MMP9    | -0.11 | 7.53E-05 |
| 2653 | cg19368582 | MMRN2   | -0.17 | 1.84E-13 |
| 2654 | cg25119415 | MNDA    | -0.24 | 1.50E-30 |
| 2655 | cg19382714 | MOG     | -0.20 | 3.07E-14 |
| 2656 | cg03589001 | MORF4L1 | 0.14  | 3.35E-09 |
| 2657 | cg07570142 | MOXD1   | 0.26  | 1.31E-10 |
| 2658 | cg25473396 | MPG     | -0.11 | 7.61E-06 |
| 2659 | cg13828047 | MPI     | 0.13  | 1.82E-07 |
| 2660 | cg06312477 | MPN2    | -0.11 | 5.10E-11 |
| 2661 | cg20342082 | MPN2    | -0.13 | 5.21E-07 |
| 2662 | cg09421562 | MPO     | -0.11 | 8.96E-07 |
| 2663 | cg04988978 | MPO     | -0.13 | 2.13E-10 |
| 2664 | cg03557733 | MPP2    | 0.18  | 5.86E-05 |
| 2665 | cg07112154 | MPP2    | 0.15  | 2.63E-05 |
| 2666 | cg17749384 | MPP7    | -0.12 | 6.88E-06 |
| 2667 | cg22933847 | MRGPRF  | 0.24  | 8.49E-16 |
| 2668 | cg23001457 | MRGPRX1 | -0.22 | 2.08E-24 |
| 2669 | cg24252809 | MRGPRX1 | -0.28 | 3.82E-20 |
| 2670 | cg13062935 | MRGPRX2 | -0.13 | 2.52E-05 |
| 2671 | cg16446783 | MRGPRX4 | -0.11 | 1.09E-07 |
| 2672 | cg20275133 | MRPL20  | 0.12  | 1.84E-11 |
| 2673 | cg24541550 | MRVII   | -0.16 | 9.91E-08 |
| 2674 | cg24365867 | MRVII   | -0.19 | 1.08E-09 |
| 2675 | cg06806711 | MS4A1   | -0.21 | 5.97E-16 |
| 2676 | cg07221454 | MS4A10  | -0.15 | 6.69E-10 |
| 2677 | cg23307338 | MS4A12  | -0.18 | 1.45E-12 |
| 2678 | cg10414946 | MS4A2   | -0.10 | 4.08E-07 |
| 2679 | cg17173423 | MS4A3   | -0.21 | 2.84E-18 |
| 2680 | cg03634982 | MS4A4A  | -0.12 | 6.72E-07 |
| 2681 | cg06066303 | MS4A5   | -0.27 | 3.43E-18 |
| 2682 | cg04353769 | MS4A6A  | -0.13 | 1.21E-08 |
| 2683 | cg18343292 | MS4A7   | -0.14 | 1.00E-21 |
| 2684 | cg10853416 | MS4A7   | -0.34 | 7.94E-27 |
| 2685 | cg23710218 | MSC     | 0.25  | 1.50E-14 |
| 2686 | cg08244028 | MSH3    | -0.12 | 2.91E-06 |
| 2687 | cg06100324 | MSLN    | -0.17 | 3.21E-11 |
| 2688 | cg17501569 | MSLN    | -0.22 | 1.56E-14 |
| 2689 | cg16303562 | MSR1    | -0.22 | 3.34E-27 |
| 2690 | cg01668126 | MSR1    | -0.23 | 2.40E-18 |
| 2691 | cg03332271 | MST1R   | 0.17  | 2.85E-07 |
| 2692 | cg15696781 | MSTO1   | 0.17  | 2.58E-07 |
| 2693 | cg20588069 | MSX1    | 0.22  | 1.31E-09 |
| 2694 | cg24840099 | MSX1    | 0.21  | 2.64E-10 |
| 2695 | cg03843978 | MSX1    | 0.19  | 1.18E-17 |

|      |            |         |       |          |
|------|------------|---------|-------|----------|
| 2696 | cg20891301 | MSX1    | 0.17  | 1.17E-15 |
| 2697 | cg03199651 | MSX1    | 0.16  | 5.59E-08 |
| 2698 | cg20161179 | MSX1    | 0.16  | 8.04E-07 |
| 2699 | cg09748975 | MSX1    | 0.15  | 5.56E-17 |
| 2700 | cg06094150 | MT1B    | -0.10 | 2.42E-06 |
| 2701 | cg16158681 | MT3     | 0.35  | 1.94E-17 |
| 2702 | cg22655224 | MT3     | 0.10  | 5.04E-04 |
| 2703 | cg01015871 | MT4     | -0.17 | 1.92E-11 |
| 2704 | cg24633648 | MTAC2D1 | 0.11  | 2.31E-06 |
| 2705 | cg15737319 | MTHFD2  | 0.37  | 8.62E-21 |
| 2706 | cg17687883 | MTHFD2  | 0.22  | 1.23E-08 |
| 2707 | cg24620905 | MTMR11  | -0.11 | 6.69E-10 |
| 2708 | cg06039392 | MTNR1A  | 0.10  | 1.84E-04 |
| 2709 | cg15842276 | MTNR1B  | 0.23  | 2.11E-27 |
| 2710 | cg03087937 | MUC15   | -0.15 | 7.83E-08 |
| 2711 | cg16215361 | MUC15   | -0.19 | 1.90E-11 |
| 2712 | cg01584473 | MUC17   | -0.18 | 2.00E-13 |
| 2713 | cg07873488 | MUC17   | -0.21 | 4.56E-17 |
| 2714 | cg00644033 | MUC3B   | -0.13 | 1.62E-10 |
| 2715 | cg15589427 | MUC4    | -0.24 | 5.37E-17 |
| 2716 | cg03818682 | MUC5AC  | -0.19 | 2.95E-18 |
| 2717 | cg03609102 | MUC5B   | -0.17 | 1.57E-12 |
| 2718 | cg22407504 | MUC5B   | -0.21 | 7.30E-13 |
| 2719 | cg22289115 | MUCDHL  | -0.14 | 1.35E-06 |
| 2720 | cg21130374 | MX2     | -0.12 | 1.64E-04 |
| 2721 | cg04828792 | MX2     | -0.27 | 5.47E-17 |
| 2722 | cg05832051 | MYADM   | 0.40  | 5.02E-20 |
| 2723 | cg26207503 | MYF5    | 0.27  | 2.03E-18 |
| 2724 | cg21126707 | MYF5    | 0.11  | 2.34E-04 |
| 2725 | cg26711820 | MYF6    | 0.10  | 1.24E-05 |
| 2726 | cg23400451 | MYH4    | -0.11 | 2.79E-07 |
| 2727 | cg21301148 | MYH6    | -0.10 | 1.99E-13 |
| 2728 | cg14541311 | MYH6    | -0.30 | 1.03E-19 |
| 2729 | cg01429391 | MYH7    | -0.11 | 8.45E-06 |
| 2730 | cg12339029 | MYL1    | -0.24 | 3.60E-21 |
| 2731 | cg24353217 | MYL2    | -0.13 | 8.96E-07 |
| 2732 | cg10591174 | MYL2    | -0.14 | 6.47E-11 |
| 2733 | cg15439078 | MYL3    | -0.11 | 3.34E-15 |
| 2734 | cg05294455 | MYL4    | -0.14 | 3.52E-12 |
| 2735 | cg23595927 | MYL5    | -0.21 | 5.59E-15 |
| 2736 | cg23370883 | MYL7    | -0.14 | 1.18E-14 |
| 2737 | cg09786221 | MYL9    | 0.35  | 2.11E-12 |
| 2738 | cg21671476 | MYL9    | 0.17  | 9.51E-11 |
| 2739 | cg04376312 | MYLK    | 0.16  | 1.10E-06 |
| 2740 | cg03731616 | MYLK    | 0.11  | 1.81E-04 |
| 2741 | cg19961522 | MYLK2   | -0.10 | 1.07E-08 |
| 2742 | cg08860143 | MYLPF   | -0.11 | 5.61E-09 |
| 2743 | cg07862358 | MYO10   | 0.30  | 6.02E-12 |
| 2744 | cg19796273 | MYO10   | 0.22  | 6.47E-11 |
| 2745 | cg25013838 | MYO18B  | -0.12 | 6.81E-06 |

|      |            |        |       |          |
|------|------------|--------|-------|----------|
| 2746 | cg23771603 | MYO3A  | 0.19  | 6.71E-06 |
| 2747 | cg08441170 | MYO3A  | 0.10  | 5.31E-03 |
| 2748 | cg23287547 | MYO5A  | 0.14  | 2.11E-06 |
| 2749 | cg04882759 | MYOCD  | -0.27 | 1.84E-15 |
| 2750 | cg18555440 | MYOD1  | 0.40  | 6.16E-25 |
| 2751 | cg07271264 | MYOD1  | 0.15  | 2.17E-04 |
| 2752 | cg24322623 | MYOD1  | 0.13  | 5.39E-06 |
| 2753 | cg10677144 | MYOM1  | -0.14 | 1.32E-05 |
| 2754 | cg25070010 | MYRIP  | 0.12  | 4.66E-04 |
| 2755 | cg10071275 | MYT1   | -0.14 | 3.35E-08 |
| 2756 | cg16772207 | MYT1   | -0.19 | 1.16E-10 |
| 2757 | cg17894008 | NACAL  | -0.17 | 3.87E-08 |
| 2758 | cg18484189 | NALP10 | -0.19 | 5.73E-15 |
| 2759 | cg20311730 | NALP10 | -0.29 | 9.15E-23 |
| 2760 | cg03789934 | NALP11 | -0.12 | 1.54E-15 |
| 2761 | cg25866075 | NALP12 | -0.16 | 1.48E-09 |
| 2762 | cg07042144 | NALP12 | -0.22 | 4.66E-16 |
| 2763 | cg25203856 | NALP14 | -0.19 | 2.48E-14 |
| 2764 | cg02347487 | NALP14 | -0.26 | 8.56E-18 |
| 2765 | cg16106497 | NALP2  | -0.11 | 3.12E-04 |
| 2766 | cg18059223 | NALP2  | -0.17 | 3.72E-09 |
| 2767 | cg14930706 | NALP4  | -0.10 | 2.44E-06 |
| 2768 | cg26264314 | NALP5  | -0.21 | 7.75E-12 |
| 2769 | cg05023116 | NALP5  | -0.25 | 7.31E-17 |
| 2770 | cg14876043 | NALP7  | -0.13 | 1.53E-09 |
| 2771 | cg08728865 | NALP7  | -0.20 | 3.72E-12 |
| 2772 | cg22190114 | NALP8  | -0.17 | 5.65E-15 |
| 2773 | cg08475088 | NALP9  | -0.28 | 3.89E-19 |
| 2774 | cg15752043 | NANOS1 | 0.23  | 7.09E-06 |
| 2775 | cg14916079 | NANOS1 | 0.21  | 4.88E-12 |
| 2776 | cg15537850 | NAPRT1 | -0.13 | 2.03E-07 |
| 2777 | cg19136075 | NBL1   | -0.13 | 2.61E-09 |
| 2778 | cg07131544 | NCR2   | -0.18 | 3.88E-10 |
| 2779 | cg04303901 | NCRMS  | -0.11 | 7.64E-05 |
| 2780 | cg00689010 | NCSTN  | -0.13 | 5.87E-07 |
| 2781 | cg13828758 | NDN    | -0.12 | 1.84E-03 |
| 2782 | cg01989224 | NDN    | -0.16 | 6.60E-11 |
| 2783 | cg18081258 | NDRG2  | 0.34  | 6.83E-22 |
| 2784 | cg00687686 | NDRG4  | 0.15  | 1.07E-05 |
| 2785 | cg01536400 | NDUFA8 | -0.14 | 1.13E-10 |
| 2786 | cg18192417 | NEBL   | 0.28  | 3.82E-10 |
| 2787 | cg24625388 | NEBL   | 0.13  | 6.44E-05 |
| 2788 | cg23290344 | NEF3   | 0.35  | 2.52E-13 |
| 2789 | cg18267374 | NEF3   | 0.30  | 6.79E-12 |
| 2790 | cg02994956 | NEFH   | 0.28  | 3.11E-18 |
| 2791 | cg16042149 | NEFH   | 0.15  | 1.19E-05 |
| 2792 | cg04645342 | NEGR1  | 0.12  | 1.27E-04 |
| 2793 | cg12978308 | NEIL1  | 0.15  | 1.30E-04 |
| 2794 | cg12600197 | NEIL1  | 0.12  | 3.98E-04 |
| 2795 | cg27065979 | NEK3   | -0.10 | 1.15E-05 |



|      |            |         |       |          |
|------|------------|---------|-------|----------|
| 2796 | cg21838334 | NES     | 0.14  | 4.12E-05 |
| 2797 | cg02755525 | NETO2   | 0.52  | 1.17E-22 |
| 2798 | cg11634198 | NEUROD2 | 0.16  | 2.85E-06 |
| 2799 | cg26312920 | NEUROD6 | -0.16 | 6.89E-17 |
| 2800 | cg11554507 | NEUROD6 | -0.24 | 1.63E-19 |
| 2801 | cg14958635 | NEUROG1 | 0.19  | 3.60E-06 |
| 2802 | cg09134003 | NEUROG2 | 0.14  | 1.64E-05 |
| 2803 | cg22289810 | NF1     | 0.12  | 2.85E-04 |
| 2804 | cg03017264 | NFAM1   | -0.16 | 3.82E-15 |
| 2805 | cg22571530 | NFASC   | 0.19  | 6.85E-07 |
| 2806 | cg07986525 | NFE2L3  | 0.20  | 3.13E-06 |
| 2807 | cg15501381 | NGB     | 0.10  | 1.40E-04 |
| 2808 | cg20059312 | NGEF    | -0.15 | 8.38E-07 |
| 2809 | cg17129388 | NGFR    | -0.12 | 5.28E-05 |
| 2810 | cg12529228 | NHLH1   | -0.11 | 3.83E-09 |
| 2811 | cg22427279 | NHLH2   | -0.11 | 6.84E-13 |
| 2812 | cg22881914 | NID2    | 0.40  | 4.95E-17 |
| 2813 | cg00739120 | NIFIE14 | 0.23  | 1.70E-11 |
| 2814 | cg00237010 | NINJ2   | 0.16  | 4.10E-11 |
| 2815 | cg15105703 | NIP     | 0.30  | 1.32E-16 |
| 2816 | cg10201668 | NIP     | 0.17  | 3.61E-08 |
| 2817 | cg10126923 | NKG7    | -0.17 | 1.30E-07 |
| 2818 | cg10539507 | NKX6-1  | 0.12  | 2.05E-04 |
| 2819 | cg09260089 | NKX6-2  | 0.49  | 3.79E-25 |
| 2820 | cg08441806 | NKX6-2  | 0.38  | 2.85E-22 |
| 2821 | cg15660077 | NLGN2   | 0.12  | 6.87E-06 |
| 2822 | cg08109815 | NMBR    | 0.29  | 5.70E-19 |
| 2823 | cg18676162 | NME4    | 0.11  | 7.22E-03 |
| 2824 | cg13707560 | NME5    | 0.20  | 9.42E-07 |
| 2825 | cg18250832 | NMUR1   | 0.13  | 1.49E-15 |
| 2826 | cg03914397 | NMUR2   | -0.28 | 7.58E-28 |
| 2827 | cg02196655 | NOL10   | 0.13  | 6.34E-04 |
| 2828 | cg06722216 | NOL4    | 0.11  | 4.06E-05 |
| 2829 | cg00273124 | NOLA2   | -0.14 | 1.98E-05 |
| 2830 | cg23896545 | NOMO1   | 0.15  | 2.59E-09 |
| 2831 | cg21006686 | NOS1    | -0.18 | 3.43E-13 |
| 2832 | cg03842617 | NOS3    | -0.20 | 2.62E-10 |
| 2833 | cg25007250 | NOS3    | -0.25 | 1.41E-16 |
| 2834 | cg17498321 | NOTCH3  | 0.13  | 1.85E-04 |
| 2835 | cg14700707 | NOTCH4  | -0.15 | 2.29E-06 |
| 2836 | cg05973262 | NOTCH4  | -0.22 | 9.39E-11 |
| 2837 | cg18488855 | NOVA1   | 0.13  | 7.75E-06 |
| 2838 | cg21461100 | NOVA2   | 0.14  | 1.80E-05 |
| 2839 | cg17063929 | NOX4    | 0.10  | 9.92E-03 |
| 2840 | cg04837071 | NOXA1   | -0.14 | 1.26E-07 |
| 2841 | cg09628601 | NPAS1   | 0.10  | 1.99E-06 |
| 2842 | cg22134325 | NPAS4   | 0.25  | 4.17E-15 |
| 2843 | cg23186643 | NPB     | 0.12  | 2.16E-03 |
| 2844 | cg21628553 | NPBWR2  | -0.20 | 4.17E-11 |
| 2845 | cg06255227 | NPBWR2  | -0.27 | 6.71E-15 |

|      |            |          |       |          |
|------|------------|----------|-------|----------|
| 2846 | cg26581729 | NPDC1    | -0.15 | 6.80E-06 |
| 2847 | cg07792737 | NPIP     | -0.12 | 2.33E-20 |
| 2848 | cg05839235 | NPR3     | 0.28  | 2.15E-10 |
| 2849 | cg00548268 | NPTX2    | 0.28  | 1.58E-15 |
| 2850 | cg12799895 | NPTX2    | 0.20  | 1.15E-07 |
| 2851 | cg05158615 | NPY      | 0.39  | 6.09E-22 |
| 2852 | cg12614105 | NPY      | 0.20  | 2.79E-09 |
| 2853 | cg18438777 | NPY5R    | 0.11  | 7.21E-04 |
| 2854 | cg19194454 | NQO1     | 0.13  | 2.85E-03 |
| 2855 | cg06650260 | NR0B2    | -0.11 | 1.39E-04 |
| 2856 | cg24580782 | NR0B2    | -0.11 | 3.42E-04 |
| 2857 | cg10055471 | NR0B2    | -0.13 | 1.08E-05 |
| 2858 | cg12613344 | NR1H3    | 0.20  | 1.46E-16 |
| 2859 | cg00554250 | NR1H3    | 0.11  | 1.85E-06 |
| 2860 | cg06277277 | NR1I3    | -0.13 | 4.21E-10 |
| 2861 | cg25214346 | NR1I3    | -0.16 | 3.62E-11 |
| 2862 | cg03958979 | NR2E1    | 0.36  | 2.41E-21 |
| 2863 | cg19697981 | NR2E1    | 0.22  | 4.74E-11 |
| 2864 | cg07890954 | NR2E3    | -0.11 | 3.06E-08 |
| 2865 | cg18860847 | NR2E3    | -0.16 | 3.68E-14 |
| 2866 | cg03533058 | NR4A1    | -0.13 | 8.99E-08 |
| 2867 | cg05194726 | NRIP2    | 0.15  | 3.50E-07 |
| 2868 | cg00830029 | NRIP2    | 0.14  | 4.37E-05 |
| 2869 | cg25511429 | NRN1     | 0.29  | 8.60E-15 |
| 2870 | cg22367989 | NRP2     | 0.28  | 9.06E-13 |
| 2871 | cg16279786 | NRXN1    | -0.10 | 6.52E-07 |
| 2872 | cg02554564 | NTF3     | -0.11 | 1.11E-07 |
| 2873 | cg04740359 | NTF3     | -0.13 | 1.11E-05 |
| 2874 | cg08108641 | NTNG2    | -0.16 | 3.55E-08 |
| 2875 | cg14384532 | NTRK3    | 0.21  | 8.07E-10 |
| 2876 | cg08888956 | NTS      | -0.15 | 5.74E-12 |
| 2877 | cg14871138 | NTSR1    | -0.20 | 3.72E-11 |
| 2878 | cg21252483 | NUCB1    | 0.13  | 1.48E-16 |
| 2879 | cg21435394 | NUDT14   | 0.11  | 1.07E-04 |
| 2880 | cg04322134 | NUDT2    | -0.12 | 6.52E-21 |
| 2881 | cg13285447 | NUMBL    | 0.16  | 4.01E-04 |
| 2882 | cg15827031 | NUP155   | 0.20  | 3.30E-08 |
| 2883 | cg07986773 | NUP50    | -0.15 | 3.22E-05 |
| 2884 | cg08532057 | NUPL1    | 0.15  | 4.46E-06 |
| 2885 | cg07586911 | NYD-SP18 | -0.16 | 7.42E-09 |
| 2886 | cg22182945 | NYD-SP26 | -0.17 | 1.62E-10 |
| 2887 | cg16418329 | NYD-SP26 | -0.20 | 9.15E-12 |
| 2888 | cg26845838 | OACT2    | 0.30  | 1.79E-11 |
| 2889 | cg03853151 | OAT      | 0.20  | 2.78E-05 |
| 2890 | cg15092802 | OBP2A    | -0.22 | 2.62E-18 |
| 2891 | cg08539093 | OBP2B    | -0.22 | 9.34E-18 |
| 2892 | cg15538820 | OBP2B    | -0.32 | 3.12E-20 |
| 2893 | cg12902039 | OCA2     | 0.16  | 3.13E-07 |
| 2894 | cg22152667 | OCM      | -0.18 | 1.33E-11 |
| 2895 | cg10335112 | ODF3     | -0.23 | 7.12E-24 |

|      |            |         |       |          |
|------|------------|---------|-------|----------|
| 2896 | cg16225091 | ODF3    | -0.28 | 1.28E-19 |
| 2897 | cg22168676 | OFCC1   | -0.15 | 2.62E-09 |
| 2898 | cg07408740 | OGDH    | -0.11 | 3.41E-06 |
| 2899 | cg21387281 | OGFR    | 0.12  | 3.72E-12 |
| 2900 | cg08268099 | OLFM1   | -0.24 | 6.35E-20 |
| 2901 | cg00208967 | OLFM2   | 0.23  | 2.82E-15 |
| 2902 | cg10246520 | OLFM4   | -0.28 | 6.89E-18 |
| 2903 | cg18506679 | OLFML2A | -0.16 | 1.31E-12 |
| 2904 | cg25853078 | OPCML   | -0.10 | 1.73E-07 |
| 2905 | cg09261262 | OPN4    | -0.20 | 3.39E-19 |
| 2906 | cg19869139 | OPRD1   | -0.16 | 2.00E-08 |
| 2907 | cg09970593 | OPRD1   | -0.19 | 1.41E-13 |
| 2908 | cg05657520 | OPTC    | -0.18 | 5.33E-10 |
| 2909 | cg22951794 | OR10A5  | -0.35 | 3.05E-22 |
| 2910 | cg22593486 | OR10H1  | -0.14 | 1.12E-12 |
| 2911 | cg12513379 | OR10H2  | -0.11 | 4.73E-14 |
| 2912 | cg24926780 | OR10H2  | -0.14 | 5.79E-13 |
| 2913 | cg25843439 | OR10H3  | -0.14 | 6.04E-11 |
| 2914 | cg04737405 | OR12D2  | -0.11 | 2.82E-11 |
| 2915 | cg21414251 | OR12D2  | -0.17 | 8.03E-19 |
| 2916 | cg03608577 | OR12D3  | -0.25 | 4.27E-14 |
| 2917 | cg20856834 | OR12D3  | -0.25 | 4.20E-19 |
| 2918 | cg16678925 | OR1A2   | -0.14 | 3.93E-15 |
| 2919 | cg02721374 | OR1D2   | -0.18 | 2.62E-16 |
| 2920 | cg22510822 | OR1E2   | -0.12 | 3.13E-07 |
| 2921 | cg07879977 | OR1F1   | -0.14 | 2.76E-05 |
| 2922 | cg27622610 | OR1G1   | -0.20 | 8.74E-14 |
| 2923 | cg14598387 | OR1N1   | -0.13 | 6.74E-12 |
| 2924 | cg16473288 | OR1N1   | -0.14 | 3.08E-10 |
| 2925 | cg17026542 | OR2A4   | -0.12 | 1.32E-07 |
| 2926 | cg24264578 | OR2C1   | -0.12 | 1.08E-10 |
| 2927 | cg13397379 | OR2C3   | -0.32 | 4.20E-22 |
| 2928 | cg08634024 | OR2F1   | -0.26 | 1.83E-16 |
| 2929 | cg09931793 | OR2K2   | -0.15 | 7.09E-10 |
| 2930 | cg27341860 | OR2L13  | -0.25 | 4.89E-16 |
| 2931 | cg05071677 | OR2V2   | -0.15 | 5.92E-10 |
| 2932 | cg11360149 | OR2V2   | -0.28 | 1.93E-14 |
| 2933 | cg14014613 | OR3A1   | -0.21 | 4.27E-14 |
| 2934 | cg05674036 | OR3A3   | -0.14 | 3.75E-10 |
| 2935 | cg06353345 | OR51B4  | -0.18 | 8.51E-21 |
| 2936 | cg25890048 | OR5I1   | -0.21 | 1.21E-17 |
| 2937 | cg13410437 | OR5P2   | -0.31 | 2.14E-20 |
| 2938 | cg01469547 | OR5P3   | -0.34 | 9.91E-23 |
| 2939 | cg14258236 | OR5V1   | -0.19 | 6.35E-10 |
| 2940 | cg24076830 | OR5V1   | -0.20 | 2.02E-12 |
| 2941 | cg05112299 | OR7A17  | -0.14 | 2.58E-19 |
| 2942 | cg02124291 | OR7A5   | -0.18 | 1.39E-12 |
| 2943 | cg06639544 | OR7A5   | -0.20 | 1.27E-16 |
| 2944 | cg24992780 | OR7C1   | -0.16 | 1.79E-10 |
| 2945 | cg03544379 | OR7C2   | -0.24 | 6.36E-22 |

|      |            |         |       |          |
|------|------------|---------|-------|----------|
| 2946 | cg14620221 | OR8B8   | -0.23 | 3.07E-12 |
| 2947 | cg16612699 | OR8B8   | -0.25 | 3.05E-13 |
| 2948 | cg00969271 | ORM2    | -0.13 | 1.01E-05 |
| 2949 | cg16408565 | ORM2    | -0.18 | 5.71E-07 |
| 2950 | cg07873128 | OSBPL5  | -0.11 | 5.76E-09 |
| 2951 | cg06131936 | OSBPL5  | -0.12 | 8.40E-08 |
| 2952 | cg11219178 | OSBPL5  | -0.15 | 6.23E-10 |
| 2953 | cg12514506 | OSBPL5  | -0.16 | 8.98E-08 |
| 2954 | cg25852715 | OSBPL5  | -0.17 | 1.72E-11 |
| 2955 | cg21098323 | OSCAR   | 0.14  | 5.39E-10 |
| 2956 | cg16029760 | OSTbeta | 0.32  | 1.11E-19 |
| 2957 | cg26900154 | OTOF    | -0.11 | 3.96E-05 |
| 2958 | cg27305303 | OTOF    | -0.26 | 1.59E-19 |
| 2959 | cg09222115 | OTOS    | -0.12 | 2.53E-06 |
| 2960 | cg18790143 | OTOS    | -0.20 | 2.18E-09 |
| 2961 | cg01421985 | OTUD7   | -0.13 | 4.39E-19 |
| 2962 | cg09558502 | OVGP1   | -0.15 | 6.23E-15 |
| 2963 | cg20909686 | OVOL1   | 0.37  | 8.69E-20 |
| 2964 | cg13496736 | OVOL1   | 0.32  | 2.70E-13 |
| 2965 | cg20315951 | OVOL1   | 0.19  | 4.97E-09 |
| 2966 | cg03681481 | OVOL1   | 0.10  | 1.34E-04 |
| 2967 | cg08590939 | OXCT1   | 0.38  | 5.30E-23 |
| 2968 | cg11487705 | OXCT1   | 0.30  | 2.35E-11 |
| 2969 | cg04144788 | OXCT2   | 0.16  | 6.03E-06 |
| 2970 | cg26955850 | OXT     | 0.13  | 8.08E-05 |
| 2971 | cg23391006 | OXTR    | 0.12  | 9.61E-06 |
| 2972 | cg26697117 | P2RX1   | -0.11 | 3.41E-07 |
| 2973 | cg10287137 | P2RY2   | -0.16 | 3.60E-07 |
| 2974 | cg06637774 | P2RY6   | 0.13  | 4.51E-04 |
| 2975 | cg15903837 | P2RY6   | -0.11 | 1.18E-10 |
| 2976 | cg05671350 | P4HA3   | 0.18  | 1.54E-08 |
| 2977 | cg03924115 | P518    | 0.11  | 2.47E-12 |
| 2978 | cg25022327 | P53AIP1 | -0.22 | 8.86E-12 |
| 2979 | cg00094319 | PABPC3  | -0.14 | 4.65E-10 |
| 2980 | cg23043245 | PACSIN1 | 0.26  | 2.32E-14 |
| 2981 | cg23239444 | PACSIN1 | 0.17  | 2.65E-06 |
| 2982 | cg17502536 | PADI1   | -0.19 | 2.36E-10 |
| 2983 | cg22193702 | PADI1   | -0.25 | 7.30E-15 |
| 2984 | cg12858514 | PADI3   | -0.15 | 3.88E-09 |
| 2985 | cg01459162 | PADI3   | -0.19 | 9.33E-13 |
| 2986 | cg03264414 | PAEP    | -0.23 | 5.66E-14 |
| 2987 | cg01055695 | PAEP    | -0.36 | 5.27E-24 |
| 2988 | cg06958211 | PAK6    | -0.11 | 1.62E-09 |
| 2989 | cg11896271 | PANX2   | 0.14  | 9.55E-04 |
| 2990 | cg08191915 | PANX3   | -0.16 | 9.19E-10 |
| 2991 | cg03885639 | PANX3   | -0.17 | 2.09E-14 |
| 2992 | cg10994126 | PAPPA2  | -0.15 | 8.30E-10 |
| 2993 | cg09191232 | PAPSS1  | 0.15  | 2.17E-08 |
| 2994 | cg13644052 | PAQR4   | -0.24 | 3.02E-16 |
| 2995 | cg13117105 | PAQR5   | 0.10  | 1.42E-03 |

|      |            |          |       |          |
|------|------------|----------|-------|----------|
| 2996 | cg24323031 | PAQR8    | 0.14  | 9.24E-05 |
| 2997 | cg26301689 | PAQR9    | -0.19 | 1.90E-09 |
| 2998 | cg15426734 | PARD6A   | 0.27  | 7.74E-15 |
| 2999 | cg07937272 | PARP12   | 0.14  | 5.41E-09 |
| 3000 | cg09712066 | PART1    | -0.13 | 2.37E-06 |
| 3001 | cg26861460 | PARVG    | -0.15 | 8.81E-13 |
| 3002 | cg19863740 | PARVG    | -0.18 | 7.08E-14 |
| 3003 | cg19345602 | PATE     | -0.11 | 9.18E-13 |
| 3004 | cg10377274 | PATE     | -0.32 | 1.29E-23 |
| 3005 | cg24401441 | PAX1     | -0.13 | 3.85E-10 |
| 3006 | cg08886154 | PAX4     | -0.26 | 9.45E-30 |
| 3007 | cg16514843 | PAX4     | -0.29 | 3.07E-23 |
| 3008 | cg25242557 | PAX6     | 0.12  | 7.07E-04 |
| 3009 | cg00509670 | PAX9     | 0.13  | 4.76E-05 |
| 3010 | cg26620157 | PAX9     | 0.12  | 5.14E-06 |
| 3011 | cg19996355 | PBX4     | 0.37  | 2.87E-21 |
| 3012 | cg23158811 | PBX4     | 0.30  | 2.29E-16 |
| 3013 | cg07685034 | PCBP3    | -0.14 | 6.68E-12 |
| 3014 | cg23272214 | PCBP3    | -0.25 | 8.01E-17 |
| 3015 | cg04797496 | PCDH12   | -0.15 | 6.48E-15 |
| 3016 | cg20366906 | PCDH8    | 0.26  | 2.17E-13 |
| 3017 | cg20514617 | PCDHA9   | -0.12 | 1.46E-08 |
| 3018 | cg12629325 | PCDHAC1  | 0.30  | 1.88E-10 |
| 3019 | cg18902090 | PCDHAC1  | 0.19  | 9.97E-07 |
| 3020 | cg07899016 | PCDHB12  | -0.11 | 2.62E-09 |
| 3021 | cg11368643 | PCDHB15  | 0.11  | 6.22E-04 |
| 3022 | cg02260587 | PCDHB2   | 0.10  | 1.18E-05 |
| 3023 | cg11647681 | PCDHGA12 | 0.29  | 8.13E-17 |
| 3024 | cg07730329 | PCDHGA12 | 0.29  | 2.64E-16 |
| 3025 | cg00911351 | PCDHGB4  | 0.14  | 1.95E-06 |
| 3026 | cg23563234 | PCDHGB7  | 0.40  | 4.71E-24 |
| 3027 | cg14011639 | PCDHGB7  | 0.26  | 2.84E-15 |
| 3028 | cg15361590 | PCDHGC4  | 0.28  | 1.85E-13 |
| 3029 | cg12145907 | PCDHGC4  | 0.13  | 1.78E-07 |
| 3030 | cg17108383 | PCDHGC5  | -0.10 | 1.54E-04 |
| 3031 | cg00943245 | PCDHGC5  | -0.12 | 1.09E-06 |
| 3032 | cg16101800 | PCK1     | -0.11 | 1.78E-05 |
| 3033 | cg13662243 | PCMT1    | -0.12 | 5.87E-10 |
| 3034 | cg26777475 | PCOLCE   | -0.10 | 3.96E-05 |
| 3035 | cg26563737 | PCOLN3   | -0.19 | 3.21E-14 |
| 3036 | cg02910574 | PCOLN3   | -0.23 | 3.27E-14 |
| 3037 | cg00895324 | PCP4     | -0.25 | 1.10E-25 |
| 3038 | cg09786257 | PCSK1    | 0.27  | 5.52E-26 |
| 3039 | cg23187653 | PCSK1    | 0.21  | 1.33E-10 |
| 3040 | cg20249919 | PCSK6    | -0.12 | 1.52E-05 |
| 3041 | cg18096388 | PDCD1    | -0.14 | 2.09E-15 |
| 3042 | cg00795812 | PDCD1    | -0.26 | 2.47E-12 |
| 3043 | cg24133115 | PDE10A   | 0.17  | 1.60E-05 |
| 3044 | cg01431114 | PDE10A   | 0.12  | 1.31E-03 |
| 3045 | cg13899108 | PDE4C    | 0.19  | 3.18E-18 |

|      |            |         |       |          |
|------|------------|---------|-------|----------|
| 3046 | cg17861230 | PDE4C   | 0.17  | 7.40E-06 |
| 3047 | cg11935147 | PDE4DIP | 0.35  | 5.28E-33 |
| 3048 | cg18915143 | PDE6A   | -0.11 | 1.46E-06 |
| 3049 | cg05078019 | PDE6B   | -0.14 | 3.06E-05 |
| 3050 | cg12435792 | PDE6B   | -0.21 | 2.01E-10 |
| 3051 | cg12572827 | PDE6H   | -0.16 | 5.53E-12 |
| 3052 | cg09447105 | PDE6H   | -0.27 | 1.03E-17 |
| 3053 | cg00516481 | PDE9A   | 0.11  | 9.46E-04 |
| 3054 | cg12727795 | PDGFRB  | 0.19  | 3.13E-11 |
| 3055 | cg27108154 | PDHA2   | -0.25 | 3.06E-15 |
| 3056 | cg17725968 | PDHA2   | -0.31 | 6.86E-23 |
| 3057 | cg22171829 | PDK4    | -0.11 | 4.15E-08 |
| 3058 | cg14444710 | PDPK1   | -0.22 | 4.84E-16 |
| 3059 | cg14944362 | PDYN    | -0.13 | 1.40E-09 |
| 3060 | cg11245384 | PDYN    | -0.16 | 3.14E-08 |
| 3061 | cg13019092 | PDZK1   | -0.15 | 1.53E-10 |
| 3062 | cg10321723 | PDZK1   | -0.18 | 6.58E-12 |
| 3063 | cg22705225 | PDZK3   | 0.11  | 1.17E-04 |
| 3064 | cg14473924 | PDZRN3  | 0.13  | 1.53E-04 |
| 3065 | cg20352371 | PDZRN4  | -0.18 | 3.17E-11 |
| 3066 | cg15417244 | PDZRN4  | -0.25 | 6.27E-16 |
| 3067 | cg21099488 | PELI2   | 0.10  | 3.56E-04 |
| 3068 | cg04598121 | PENK    | 0.19  | 5.72E-09 |
| 3069 | cg06546607 | PEPD    | 0.14  | 3.63E-06 |
| 3070 | cg25514503 | PER3    | -0.10 | 1.32E-04 |
| 3071 | cg27446233 | PFKM    | -0.11 | 3.74E-06 |
| 3072 | cg08465862 | PFKP    | 0.24  | 5.06E-10 |
| 3073 | cg10247268 | PFKP    | 0.19  | 2.14E-08 |
| 3074 | cg19890739 | Pfs2    | 0.11  | 4.47E-06 |
| 3075 | cg11957986 | PGA5    | -0.15 | 7.66E-11 |
| 3076 | cg09750183 | PGA5    | -0.20 | 2.02E-14 |
| 3077 | cg26057752 | PGAM2   | 0.16  | 1.46E-05 |
| 3078 | cg17391877 | PGC     | -0.12 | 3.98E-07 |
| 3079 | cg12855851 | PGC     | -0.15 | 4.12E-07 |
| 3080 | cg01892689 | PGCP    | -0.18 | 3.05E-14 |
| 3081 | cg12841020 | PGF     | 0.10  | 1.75E-03 |
| 3082 | cg09299388 | PGK2    | -0.26 | 7.50E-16 |
| 3083 | cg02806777 | PGLYRP1 | 0.20  | 4.49E-10 |
| 3084 | cg06275635 | PGLYRP3 | -0.18 | 1.21E-12 |
| 3085 | cg09448880 | PGLYRP3 | -0.30 | 9.98E-25 |
| 3086 | cg11442717 | PHF10   | 0.10  | 7.74E-04 |
| 3087 | cg01775414 | PHF21B  | 0.15  | 1.32E-05 |
| 3088 | cg19759064 | PHKG1   | -0.11 | 5.33E-05 |
| 3089 | cg18722841 | PHOX2A  | 0.16  | 7.64E-07 |
| 3090 | cg08876932 | PHOX2A  | 0.10  | 2.72E-05 |
| 3091 | cg04893119 | PI15    | -0.10 | 2.32E-04 |
| 3092 | cg02442161 | PI3     | -0.22 | 4.31E-20 |
| 3093 | cg11635563 | PIG38   | -0.14 | 8.26E-09 |
| 3094 | cg23166362 | PIK3CD  | 0.12  | 3.78E-06 |
| 3095 | cg13453139 | PIK3R5  | -0.25 | 3.03E-13 |

|      |            |          |       |          |
|------|------------|----------|-------|----------|
| 3096 | cg09528351 | PIK3R5   | -0.25 | 8.20E-15 |
| 3097 | cg15542496 | PIP      | -0.11 | 1.64E-05 |
| 3098 | cg26628847 | PIP      | -0.16 | 5.26E-10 |
| 3099 | cg19690214 | PIP3-E   | -0.14 | 2.59E-12 |
| 3100 | cg10082841 | PIP5KL1  | 0.12  | 1.45E-04 |
| 3101 | cg17599586 | PISD     | 0.23  | 5.18E-05 |
| 3102 | cg16759954 | PITPNM3  | -0.12 | 8.81E-08 |
| 3103 | cg24495017 | PITX1    | 0.25  | 7.55E-11 |
| 3104 | cg14681055 | PITX3    | 0.30  | 1.23E-10 |
| 3105 | cg22882178 | PITX3    | 0.23  | 1.33E-08 |
| 3106 | cg10365880 | PKD2L1   | -0.19 | 2.95E-11 |
| 3107 | cg11377136 | PKDREJ   | 0.46  | 1.19E-35 |
| 3108 | cg02280309 | PKLR     | -0.16 | 1.12E-12 |
| 3109 | cg02510853 | PKMYT1   | 0.22  | 1.04E-20 |
| 3110 | cg02044879 | PLA2G12B | -0.13 | 6.76E-06 |
| 3111 | cg21820890 | PLA2G12B | -0.16 | 3.72E-07 |
| 3112 | cg22220722 | PLA2G2A  | -0.17 | 1.86E-09 |
| 3113 | cg11037787 | PLA2G2A  | -0.20 | 4.18E-14 |
| 3114 | cg14321743 | PLA2G2D  | -0.21 | 1.99E-13 |
| 3115 | cg07142319 | PLA2G2D  | -0.23 | 4.15E-15 |
| 3116 | cg16825000 | PLA2G2E  | -0.19 | 7.43E-14 |
| 3117 | cg16087263 | PLA2G2F  | -0.13 | 7.84E-10 |
| 3118 | cg11933267 | PLA2G2F  | -0.18 | 4.95E-11 |
| 3119 | cg21274025 | PLA2G3   | -0.18 | 2.27E-08 |
| 3120 | cg15228639 | PLA2G4E  | -0.16 | 8.48E-14 |
| 3121 | cg18630040 | PLA2G7   | 0.31  | 2.20E-10 |
| 3122 | cg04367351 | PLA2R1   | 0.11  | 8.03E-07 |
| 3123 | cg16483916 | PLAC2    | 0.26  | 1.97E-11 |
| 3124 | cg04993257 | PLAC2    | 0.24  | 2.48E-14 |
| 3125 | cg12091331 | PLAT     | 0.15  | 4.33E-07 |
| 3126 | cg06521280 | PLAU     | 0.21  | 3.29E-12 |
| 3127 | cg15120942 | PLCD1    | 0.18  | 7.67E-08 |
| 3128 | cg09480837 | PLCE1    | -0.13 | 2.90E-04 |
| 3129 | cg21522797 | PLCG2    | -0.13 | 2.62E-09 |
| 3130 | cg02833180 | PLCL1    | -0.20 | 6.16E-14 |
| 3131 | cg25573386 | PLCZ1    | -0.13 | 9.52E-08 |
| 3132 | cg12613383 | PLD5     | 0.15  | 8.29E-06 |
| 3133 | cg17641252 | PLEK2    | 0.13  | 1.13E-05 |
| 3134 | cg20141916 | PLEK2    | 0.11  | 6.46E-04 |
| 3135 | cg21581873 | PLEKHA6  | 0.18  | 1.23E-10 |
| 3136 | cg27549944 | PLEKHA6  | 0.16  | 8.42E-11 |
| 3137 | cg25288155 | PLEKHB1  | -0.13 | 1.52E-05 |
| 3138 | cg02254407 | PLEKHB1  | -0.20 | 9.42E-09 |
| 3139 | cg12072973 | PLEKHO1  | 0.26  | 2.26E-07 |
| 3140 | cg15083227 | PLEKHQ1  | 0.13  | 9.75E-06 |
| 3141 | cg14003512 | PLGLB2   | -0.13 | 9.18E-13 |
| 3142 | cg06240124 | PLK1     | 0.12  | 3.94E-03 |
| 3143 | cg25527547 | PLOD3    | -0.13 | 1.91E-07 |
| 3144 | cg26220350 | PLTP     | 0.25  | 2.69E-11 |
| 3145 | cg11846968 | PLUNC    | -0.18 | 9.99E-17 |

|      |            |          |       |          |
|------|------------|----------|-------|----------|
| 3146 | cg14601284 | PLXDC1   | 0.13  | 2.17E-05 |
| 3147 | cg06084117 | PLXNA4B  | -0.27 | 2.61E-16 |
| 3148 | cg17356112 | PLXNA4B  | -0.28 | 2.32E-19 |
| 3149 | cg09837648 | PLXNB1   | 0.17  | 2.04E-10 |
| 3150 | cg24770850 | PLXND1   | 0.21  | 2.12E-07 |
| 3151 | cg13415207 | PMAIP1   | 0.28  | 6.02E-12 |
| 3152 | cg12530080 | PMCHL1   | -0.11 | 3.96E-10 |
| 3153 | cg03242666 | PMP22    | -0.13 | 2.43E-09 |
| 3154 | cg11812202 | PNLIP    | -0.21 | 7.00E-15 |
| 3155 | cg27600794 | PNLIPRP1 | -0.20 | 4.99E-14 |
| 3156 | cg11310496 | PNLIPRP2 | -0.11 | 2.13E-07 |
| 3157 | cg16272420 | PNLIPRP2 | -0.26 | 2.48E-20 |
| 3158 | cg23681213 | PNMA1    | 0.21  | 4.71E-08 |
| 3159 | cg02154186 | PNMA2    | 0.33  | 6.43E-14 |
| 3160 | cg12894984 | PNMT     | -0.11 | 1.39E-04 |
| 3161 | cg19391527 | PNOC     | -0.11 | 5.12E-09 |
| 3162 | cg23092823 | PODN     | 0.29  | 1.24E-18 |
| 3163 | cg16028753 | PODN     | 0.17  | 5.89E-10 |
| 3164 | cg04739570 | PODXL2   | 0.25  | 3.00E-14 |
| 3165 | cg19593572 | POLR3E   | 0.14  | 4.49E-09 |
| 3166 | cg16302441 | POMC     | 0.13  | 5.65E-07 |
| 3167 | cg16739580 | POP2     | -0.13 | 6.35E-09 |
| 3168 | cg19363546 | POU2F3   | 0.16  | 4.12E-06 |
| 3169 | cg21243096 | POU3F1   | 0.39  | 4.91E-24 |
| 3170 | cg17791651 | POU3F1   | 0.27  | 2.63E-12 |
| 3171 | cg20291049 | POU3F3   | 0.34  | 1.82E-17 |
| 3172 | cg08097882 | POU4F1   | 0.46  | 1.25E-20 |
| 3173 | cg15604467 | POU4F1   | 0.26  | 3.48E-11 |
| 3174 | cg24199834 | POU4F2   | 0.31  | 6.84E-17 |
| 3175 | cg13262687 | POU4F2   | 0.17  | 1.68E-09 |
| 3176 | cg03251857 | PPAPDC3  | -0.19 | 5.63E-10 |
| 3177 | cg20357806 | PPBP     | -0.14 | 7.76E-09 |
| 3178 | cg14724265 | PPEF2    | -0.12 | 2.41E-09 |
| 3179 | cg24920358 | PPIE     | 0.15  | 6.33E-05 |
| 3180 | cg09350141 | PPM1F    | 0.14  | 6.82E-05 |
| 3181 | cg20276750 | PPM1M    | 0.15  | 3.87E-04 |
| 3182 | cg24834740 | PPP1R16B | 0.16  | 4.77E-06 |
| 3183 | cg27377213 | PPP1R16B | 0.11  | 1.10E-05 |
| 3184 | cg19280968 | PPP1R2   | 0.23  | 1.40E-07 |
| 3185 | cg11164400 | PPP1R9A  | 0.20  | 5.26E-08 |
| 3186 | cg16872560 | PPP1R9A  | 0.14  | 6.59E-05 |
| 3187 | cg19221959 | PPP1R9A  | 0.11  | 1.31E-03 |
| 3188 | cg07867360 | PPP2R2C  | -0.18 | 1.02E-08 |
| 3189 | cg07038400 | PPP2R3A  | 0.31  | 8.36E-25 |
| 3190 | cg15765694 | PPP3R2   | -0.14 | 6.31E-11 |
| 3191 | cg02602411 | PPP3R2   | -0.22 | 6.90E-14 |
| 3192 | cg12585943 | PPT2     | 0.29  | 6.88E-19 |
| 3193 | cg17329164 | PPT2     | 0.24  | 9.20E-14 |
| 3194 | cg01543654 | PRAC     | 0.23  | 1.16E-13 |
| 3195 | cg12374721 | PRAC     | 0.15  | 8.51E-04 |



|      |            |         |       |          |
|------|------------|---------|-------|----------|
| 3196 | cg05208878 | PRAME   | -0.18 | 1.52E-13 |
| 3197 | cg18807515 | PRAMEF2 | -0.11 | 1.32E-06 |
| 3198 | cg27345534 | PRB2    | -0.12 | 3.74E-13 |
| 3199 | cg04520391 | PRB2    | -0.18 | 2.51E-13 |
| 3200 | cg22692158 | PRB4    | -0.15 | 3.52E-12 |
| 3201 | cg14076161 | PRB4    | -0.22 | 8.80E-19 |
| 3202 | cg09699159 | PRDM11  | -0.16 | 6.33E-12 |
| 3203 | cg20227165 | PRDM11  | -0.28 | 3.19E-24 |
| 3204 | cg01295203 | PRDM14  | 0.41  | 7.25E-22 |
| 3205 | cg08528984 | PRDM16  | 0.12  | 6.39E-04 |
| 3206 | cg12379145 | PRDM2   | -0.16 | 2.66E-14 |
| 3207 | cg25402049 | PRDM2   | -0.18 | 1.20E-12 |
| 3208 | cg19324313 | PRDM2   | -0.20 | 8.84E-16 |
| 3209 | cg02374486 | PRF1    | -0.11 | 3.21E-06 |
| 3210 | cg09914304 | PRF1    | -0.14 | 1.44E-07 |
| 3211 | cg17342283 | PRG1    | -0.11 | 5.50E-05 |
| 3212 | cg20684549 | PRG2    | 0.12  | 1.30E-04 |
| 3213 | cg15640375 | PRG2    | 0.11  | 8.38E-04 |
| 3214 | cg15357945 | PRG2    | -0.21 | 2.99E-17 |
| 3215 | cg24653967 | PRH1    | 0.17  | 1.99E-11 |
| 3216 | cg14502651 | PRH2    | 0.14  | 8.28E-08 |
| 3217 | cg12493160 | PRKACG  | -0.16 | 2.94E-09 |
| 3218 | cg13577076 | PRKAR1B | 0.33  | 9.28E-18 |
| 3219 | cg13705707 | PRKAR2B | 0.12  | 1.13E-05 |
| 3220 | cg05436658 | PRKCB1  | 0.33  | 3.53E-13 |
| 3221 | cg24250393 | PRKCB1  | 0.12  | 4.10E-05 |
| 3222 | cg18959478 | PRKCDBP | 0.12  | 3.29E-04 |
| 3223 | cg18392783 | PRKCDBP | 0.11  | 1.27E-04 |
| 3224 | cg02282237 | PRKCH   | 0.14  | 4.97E-07 |
| 3225 | cg21794225 | PRKD1   | 0.13  | 1.95E-04 |
| 3226 | cg09019938 | PRKG1   | 0.11  | 4.22E-04 |
| 3227 | cg16744741 | PRKG2   | -0.31 | 7.94E-27 |
| 3228 | cg09906458 | PRND    | -0.11 | 4.01E-09 |
| 3229 | cg09425898 | PRNT    | -0.21 | 1.60E-10 |
| 3230 | cg26718585 | PROC    | -0.12 | 6.90E-06 |
| 3231 | cg19462352 | PROCA1  | 0.12  | 8.96E-05 |
| 3232 | cg26806924 | PROCR   | 0.19  | 2.04E-09 |
| 3233 | cg08555612 | PROK2   | 0.11  | 7.63E-04 |
| 3234 | cg24626923 | PROKR1  | -0.13 | 1.06E-09 |
| 3235 | cg20576510 | PROM1   | -0.18 | 6.50E-10 |
| 3236 | cg00930194 | PROP1   | -0.12 | 2.53E-10 |
| 3237 | cg21478490 | PROP1   | -0.17 | 4.88E-11 |
| 3238 | cg25734864 | PROZ    | -0.13 | 9.45E-06 |
| 3239 | cg09595479 | PRPH    | 0.21  | 5.73E-07 |
| 3240 | cg24059075 | PRPH    | -0.12 | 2.90E-09 |
| 3241 | cg00911873 | PRPS1L1 | -0.17 | 4.77E-12 |
| 3242 | cg21264055 | PRR3    | 0.19  | 2.39E-07 |
| 3243 | cg04273431 | PRR3    | 0.11  | 2.88E-05 |
| 3244 | cg23240895 | PRR5    | -0.19 | 9.47E-08 |
| 3245 | cg19769182 | PRRT2   | 0.16  | 1.68E-06 |

|      |            |         |       |          |
|------|------------|---------|-------|----------|
| 3246 | cg12878228 | PRSS1   | -0.21 | 8.57E-21 |
| 3247 | cg26504906 | PRSS16  | -0.20 | 1.05E-10 |
| 3248 | cg04958389 | PRSS2   | -0.30 | 9.15E-23 |
| 3249 | cg23214764 | PRSS23  | 0.12  | 1.59E-04 |
| 3250 | cg13439730 | PRSS8   | 0.10  | 4.18E-04 |
| 3251 | cg07073964 | PRSSL1  | -0.21 | 4.86E-13 |
| 3252 | cg09134726 | PRTN3   | -0.17 | 4.81E-10 |
| 3253 | cg20281815 | PSCA    | -0.17 | 1.28E-10 |
| 3254 | cg13446199 | PSCA    | -0.22 | 3.04E-14 |
| 3255 | cg13548361 | PSD     | 0.12  | 2.84E-07 |
| 3256 | cg08093398 | PSF1    | -0.10 | 2.09E-08 |
| 3257 | cg25477904 | PSG1    | -0.11 | 1.67E-13 |
| 3258 | cg25839766 | PSG1    | -0.34 | 2.11E-26 |
| 3259 | cg04127255 | PSG2    | -0.14 | 1.07E-11 |
| 3260 | cg07745725 | PSG3    | -0.13 | 6.79E-14 |
| 3261 | cg13434203 | PSG3    | -0.17 | 1.93E-16 |
| 3262 | cg23264413 | PSG4    | -0.12 | 2.03E-11 |
| 3263 | cg01078689 | PSG5    | -0.10 | 4.23E-16 |
| 3264 | cg15586352 | PSG5    | -0.15 | 1.39E-16 |
| 3265 | cg11151665 | PSG6    | -0.10 | 2.86E-13 |
| 3266 | cg23610820 | PSG9    | -0.11 | 3.77E-15 |
| 3267 | cg16890093 | PSMB8   | 0.10  | 6.04E-05 |
| 3268 | cg12703269 | PSTPIP1 | -0.16 | 1.01E-11 |
| 3269 | cg24989962 | PTGDR   | 0.29  | 2.03E-12 |
| 3270 | cg09516965 | PTGDR   | 0.11  | 5.83E-03 |
| 3271 | cg00563932 | PTGDS   | -0.17 | 1.65E-10 |
| 3272 | cg06738602 | PTGER2  | 0.23  | 7.68E-09 |
| 3273 | cg25823578 | PTGER2  | 0.17  | 4.34E-06 |
| 3274 | cg26672426 | PTGES   | -0.14 | 4.09E-06 |
| 3275 | cg17683775 | PTGES   | -0.16 | 3.51E-08 |
| 3276 | cg03752628 | PTGFRN  | -0.12 | 1.21E-08 |
| 3277 | cg13986130 | PTGS2   | 0.19  | 2.08E-11 |
| 3278 | cg15774283 | PTGS2   | 0.12  | 1.43E-05 |
| 3279 | cg24816298 | PTH     | -0.16 | 3.63E-12 |
| 3280 | cg25057743 | PTHR2   | 0.34  | 1.32E-16 |
| 3281 | cg08747889 | PTK7    | 0.32  | 1.12E-12 |
| 3282 | cg21663580 | PTK7    | 0.21  | 9.48E-11 |
| 3283 | cg18675600 | PTP4A3  | -0.19 | 4.04E-13 |
| 3284 | cg23868119 | PTPLA   | 0.13  | 6.55E-05 |
| 3285 | cg02222362 | PTPN20B | 0.12  | 4.84E-05 |
| 3286 | cg22335340 | PTPN6   | 0.11  | 1.13E-05 |
| 3287 | cg04956511 | PTPN6   | -0.10 | 3.13E-07 |
| 3288 | cg09440243 | PTPRD   | -0.14 | 1.22E-08 |
| 3289 | cg14859417 | PTPRE   | -0.12 | 4.48E-04 |
| 3290 | cg06971096 | PTPRN   | 0.16  | 2.58E-09 |
| 3291 | cg18601426 | PTPRN2  | 0.24  | 4.62E-14 |
| 3292 | cg05119831 | PTPRN2  | 0.11  | 3.99E-06 |
| 3293 | cg10646402 | PTPRO   | 0.14  | 7.32E-06 |
| 3294 | cg11843304 | PTPRO   | -0.15 | 3.80E-17 |
| 3295 | cg00614413 | PTPRS   | -0.15 | 3.82E-22 |

|      |            |           |       |          |
|------|------------|-----------|-------|----------|
| 3296 | cg27299588 | PTPRS     | -0.22 | 2.16E-11 |
| 3297 | cg16003238 | PUNC      | 0.10  | 3.40E-04 |
| 3298 | cg09863066 | PVALB     | -0.13 | 5.70E-15 |
| 3299 | cg02978737 | PVALB     | -0.23 | 5.25E-16 |
| 3300 | cg22580353 | PVR       | -0.15 | 2.11E-12 |
| 3301 | cg10832166 | PWCR1     | -0.11 | 8.07E-08 |
| 3302 | cg13994177 | PWCR1     | -0.17 | 7.11E-13 |
| 3303 | cg26389232 | PWCR1     | -0.17 | 2.46E-16 |
| 3304 | cg14037665 | PXDN      | 0.18  | 4.17E-06 |
| 3305 | cg12164282 | PXDN      | 0.14  | 1.73E-03 |
| 3306 | cg09587549 | PYCARD    | 0.26  | 2.47E-08 |
| 3307 | cg05361373 | PYCARD    | 0.21  | 2.59E-07 |
| 3308 | cg15247144 | PYCARD    | 0.18  | 4.81E-07 |
| 3309 | cg12100791 | PYCARD    | 0.11  | 1.03E-02 |
| 3310 | cg19202384 | PYCR1     | -0.15 | 6.66E-10 |
| 3311 | cg19850348 | PYGO1     | 0.27  | 4.66E-12 |
| 3312 | cg23412777 | PYGO1     | -0.14 | 2.28E-06 |
| 3313 | cg16029957 | QPCT      | 0.14  | 3.35E-05 |
| 3314 | cg08812504 | QSCN6     | 0.24  | 5.10E-08 |
| 3315 | cg08755040 | QSCN6     | 0.14  | 3.12E-07 |
| 3316 | cg23018448 | QTRT1     | -0.13 | 2.68E-09 |
| 3317 | cg01255591 | R3HDML    | -0.20 | 8.39E-13 |
| 3318 | cg10149836 | RAB11FIP4 | 0.21  | 3.85E-10 |
| 3319 | cg04764624 | RAB11FIP4 | 0.20  | 2.41E-09 |
| 3320 | cg26029902 | RAB22A    | 0.30  | 1.96E-18 |
| 3321 | cg00848461 | RAB24     | -0.15 | 3.39E-09 |
| 3322 | cg09243900 | RAB25     | 0.17  | 1.38E-20 |
| 3323 | cg19580810 | RAB25     | 0.13  | 1.09E-15 |
| 3324 | cg17982102 | RAB31     | 0.36  | 3.68E-18 |
| 3325 | cg04274487 | RAB31     | 0.15  | 2.26E-07 |
| 3326 | cg21237418 | RAB34     | 0.13  | 4.10E-04 |
| 3327 | cg15379633 | RAB36     | 0.30  | 1.16E-18 |
| 3328 | cg13894021 | RAB36     | 0.12  | 7.29E-09 |
| 3329 | cg12448933 | RAB37     | 0.19  | 7.69E-08 |
| 3330 | cg05090725 | RAB39     | 0.26  | 6.30E-09 |
| 3331 | cg08179907 | RAB39     | 0.16  | 2.41E-07 |
| 3332 | cg05554936 | RAB3D     | 0.40  | 6.88E-14 |
| 3333 | cg20780953 | RAB3D     | 0.25  | 9.47E-08 |
| 3334 | cg06646021 | RAB4A     | -0.12 | 2.05E-06 |
| 3335 | cg22373112 | RAB5C     | 0.18  | 3.94E-11 |
| 3336 | cg11513856 | RABL5     | -0.12 | 3.52E-12 |
| 3337 | cg18265887 | RAC2      | 0.16  | 1.17E-06 |
| 3338 | cg03262773 | RAD54L    | 0.13  | 1.72E-03 |
| 3339 | cg00278366 | RAD9B     | -0.15 | 1.86E-05 |
| 3340 | cg11494699 | RAG1      | -0.14 | 1.60E-09 |
| 3341 | cg15982419 | RALBP1    | 0.15  | 9.46E-06 |
| 3342 | cg18410627 | RALGPS1   | 0.30  | 8.08E-15 |
| 3343 | cg08433538 | RALGPS1   | 0.10  | 2.09E-03 |
| 3344 | cg14436761 | RAMP2     | 0.10  | 1.10E-04 |
| 3345 | cg02417264 | RAMP3     | -0.12 | 1.29E-09 |

|      |            |         |       |          |
|------|------------|---------|-------|----------|
| 3346 | cg02902770 | RARRES2 | -0.12 | 1.14E-08 |
| 3347 | cg10274908 | RASA4   | 0.15  | 6.81E-05 |
| 3348 | cg05749161 | RASA4   | 0.15  | 8.45E-05 |
| 3349 | cg10319505 | RASEF   | 0.22  | 1.17E-06 |
| 3350 | cg16154416 | RASGRF1 | 0.19  | 4.71E-08 |
| 3351 | cg15156078 | RASGRF1 | 0.14  | 1.55E-05 |
| 3352 | cg09952204 | RASGRF2 | 0.35  | 1.21E-14 |
| 3353 | cg14170423 | RASGRP2 | 0.14  | 1.05E-07 |
| 3354 | cg01109219 | RASGRP3 | -0.11 | 3.98E-06 |
| 3355 | cg26750002 | RASIP1  | 0.11  | 1.85E-04 |
| 3356 | cg10604168 | RASL12  | 0.33  | 5.55E-20 |
| 3357 | cg21554552 | RASSF1  | 0.24  | 3.08E-17 |
| 3358 | cg00777121 | RASSF1  | 0.15  | 4.42E-12 |
| 3359 | cg08047457 | RASSF1  | 0.15  | 2.65E-11 |
| 3360 | cg19614321 | RASSF2  | 0.15  | 1.27E-06 |
| 3361 | cg08617916 | RASSF5  | 0.16  | 3.02E-04 |
| 3362 | cg02589695 | RASSF5  | 0.15  | 2.20E-04 |
| 3363 | cg01860753 | RASSF5  | 0.14  | 6.19E-04 |
| 3364 | cg17558126 | RASSF5  | 0.13  | 5.88E-04 |
| 3365 | cg25058957 | RAXL1   | -0.22 | 2.71E-16 |
| 3366 | cg25002911 | RB1     | -0.14 | 8.28E-27 |
| 3367 | cg06914598 | RBAK    | 0.26  | 2.75E-26 |
| 3368 | cg15821095 | RBM15B  | -0.24 | 6.10E-16 |
| 3369 | cg18565355 | RBM35A  | 0.18  | 2.62E-07 |
| 3370 | cg14916213 | RBM4    | 0.12  | 1.09E-03 |
| 3371 | cg25488206 | RBM9    | 0.15  | 3.27E-09 |
| 3372 | cg00615377 | RBM9    | 0.15  | 5.33E-09 |
| 3373 | cg23363832 | RBP1    | 0.28  | 2.43E-10 |
| 3374 | cg13099330 | RBP1    | 0.25  | 8.62E-10 |
| 3375 | cg06543018 | RBP1    | 0.19  | 1.46E-06 |
| 3376 | cg27457941 | RBP1    | 0.16  | 2.32E-06 |
| 3377 | cg12497564 | RBP1    | 0.13  | 3.11E-03 |
| 3378 | cg24594997 | RBP1    | 0.13  | 4.42E-05 |
| 3379 | cg11027570 | RBP1    | 0.12  | 2.03E-03 |
| 3380 | cg24053375 | RBP3    | -0.22 | 1.99E-13 |
| 3381 | cg17964955 | RBP3    | -0.24 | 1.48E-19 |
| 3382 | cg24441911 | RBP5    | -0.16 | 3.55E-07 |
| 3383 | cg04378886 | RCN3    | 0.12  | 3.83E-09 |
| 3384 | cg04720358 | RCV1    | -0.11 | 5.27E-09 |
| 3385 | cg24357161 | RCV1    | -0.23 | 3.75E-14 |
| 3386 | cg25661884 | RDH8    | -0.15 | 5.79E-10 |
| 3387 | cg18140857 | RDHE2   | -0.26 | 1.14E-19 |
| 3388 | cg15169162 | RDS     | -0.16 | 9.98E-14 |
| 3389 | cg12717594 | RECK    | 0.19  | 4.23E-06 |
| 3390 | cg27264345 | REEP2   | 0.12  | 3.91E-05 |
| 3391 | cg05828624 | REG1A   | -0.22 | 6.21E-19 |
| 3392 | cg07841014 | REG1B   | -0.30 | 1.69E-22 |
| 3393 | cg27342801 | REG3A   | -0.21 | 1.54E-11 |
| 3394 | cg00918005 | REG3G   | -0.23 | 1.71E-18 |
| 3395 | cg16158220 | REGL    | -0.17 | 1.72E-11 |

|      |            |        |       |          |
|------|------------|--------|-------|----------|
| 3396 | cg02868123 | REGL   | -0.30 | 6.00E-22 |
| 3397 | cg05556020 | REN    | -0.15 | 1.06E-09 |
| 3398 | cg19205533 | RERF   | 0.22  | 1.71E-14 |
| 3399 | cg03028472 | RERF   | 0.12  | 2.45E-04 |
| 3400 | cg20692181 | RETN   | -0.12 | 2.81E-13 |
| 3401 | cg14659547 | RETNLB | -0.31 | 8.51E-22 |
| 3402 | cg13789236 | RFK    | 0.11  | 1.13E-09 |
| 3403 | cg22825979 | RFP2   | 0.15  | 1.30E-04 |
| 3404 | cg15303841 | RFPL1  | -0.21 | 3.73E-17 |
| 3405 | cg00406844 | RFPL3  | -0.22 | 8.49E-16 |
| 3406 | cg13614181 | RGC32  | 0.27  | 1.18E-15 |
| 3407 | cg02148642 | RGPD5  | -0.20 | 7.84E-19 |
| 3408 | cg24660086 | RGR    | -0.21 | 7.39E-19 |
| 3409 | cg04041960 | RGS10  | 0.40  | 3.95E-20 |
| 3410 | cg19653161 | RGS10  | 0.23  | 1.42E-08 |
| 3411 | cg24317255 | RGS17  | 0.19  | 4.81E-09 |
| 3412 | cg20315136 | RGS2   | 0.11  | 2.19E-03 |
| 3413 | cg21303386 | RGS7   | 0.17  | 5.40E-08 |
| 3414 | cg25020850 | RGS8   | -0.22 | 9.18E-14 |
| 3415 | cg15595739 | RGS9   | -0.14 | 3.68E-07 |
| 3416 | cg19862344 | RHAG   | -0.15 | 4.25E-09 |
| 3417 | cg10523019 | RHBDD1 | 0.13  | 3.30E-04 |
| 3418 | cg24653181 | RHCG   | 0.22  | 9.20E-08 |
| 3419 | cg10453365 | RHCG   | 0.12  | 4.68E-04 |
| 3420 | cg03998173 | RHEB   | 0.11  | 2.47E-03 |
| 3421 | cg13180098 | RHO    | -0.13 | 6.12E-09 |
| 3422 | cg09088508 | RHOF   | 0.16  | 5.97E-06 |
| 3423 | cg00804392 | RHOH   | 0.13  | 1.51E-07 |
| 3424 | cg18771300 | RHOJ   | -0.12 | 4.59E-07 |
| 3425 | cg05135288 | RHOT2  | 0.10  | 5.18E-04 |
| 3426 | cg18180155 | RIBC2  | 0.10  | 8.30E-04 |
| 3427 | cg09847584 | RIMBP2 | -0.27 | 1.33E-19 |
| 3428 | cg19332710 | RIMS4  | 0.31  | 2.56E-09 |
| 3429 | cg20822579 | RIPK3  | 0.26  | 3.12E-16 |
| 3430 | cg04711324 | RIT2   | -0.36 | 4.68E-21 |
| 3431 | cg19287277 | RKHD3  | 0.14  | 1.09E-04 |
| 3432 | cg10408410 | RLBP1  | -0.12 | 8.82E-09 |
| 3433 | cg00055233 | RLN1   | 0.11  | 1.37E-06 |
| 3434 | cg20789691 | RLN1   | -0.17 | 7.53E-11 |
| 3435 | cg03679581 | RLN2   | 0.11  | 1.02E-06 |
| 3436 | cg05958352 | RNASE1 | -0.11 | 2.33E-04 |
| 3437 | cg13718960 | RNASE1 | -0.17 | 4.88E-13 |
| 3438 | cg26191951 | RNASE2 | -0.11 | 5.84E-11 |
| 3439 | cg15910079 | RNASE3 | -0.11 | 8.36E-13 |
| 3440 | cg07525077 | RNASE3 | -0.11 | 3.77E-11 |
| 3441 | cg06720660 | RNASE6 | -0.16 | 3.87E-08 |
| 3442 | cg05270634 | RND2   | 0.27  | 5.14E-12 |
| 3443 | cg00948524 | RNF135 | 0.33  | 8.97E-17 |
| 3444 | cg09754413 | RNF182 | 0.15  | 2.04E-05 |
| 3445 | cg04603184 | RNF182 | 0.14  | 6.25E-07 |

|      |            |         |       |          |
|------|------------|---------|-------|----------|
| 3446 | cg04994456 | RNF186  | -0.10 | 1.02E-03 |
| 3447 | cg05439368 | RNF36   | 0.12  | 3.92E-07 |
| 3448 | cg25766046 | ROR2    | 0.24  | 1.16E-09 |
| 3449 | cg25112191 | RORC    | -0.18 | 1.85E-13 |
| 3450 | cg26555310 | RPE65   | -0.12 | 6.66E-09 |
| 3451 | cg11724759 | RPE65   | -0.15 | 9.58E-15 |
| 3452 | cg13102585 | RPIP8   | 0.32  | 1.69E-24 |
| 3453 | cg07441272 | RPL39L  | 0.30  | 7.36E-12 |
| 3454 | cg07693270 | RPL39L  | 0.18  | 3.17E-09 |
| 3455 | cg18279742 | RPS2    | -0.14 | 1.12E-10 |
| 3456 | cg19428417 | RRAD    | 0.13  | 2.23E-07 |
| 3457 | cg26709950 | RRAD    | 0.12  | 2.15E-04 |
| 3458 | cg25635500 | RRP22   | 0.22  | 1.45E-08 |
| 3459 | cg16612562 | RRP22   | 0.19  | 5.45E-21 |
| 3460 | cg01777397 | RSNL2   | 0.15  | 9.74E-04 |
| 3461 | cg05358404 | RTEL1   | 0.13  | 2.29E-10 |
| 3462 | cg00689340 | RTKN    | -0.16 | 2.15E-10 |
| 3463 | cg08749917 | RTP1    | -0.12 | 4.10E-07 |
| 3464 | cg26536164 | RTP3    | -0.16 | 3.06E-07 |
| 3465 | cg06377278 | RUNX3   | 0.47  | 1.83E-18 |
| 3466 | cg00117172 | RUNX3   | 0.35  | 8.94E-12 |
| 3467 | cg22737001 | RUNX3   | 0.24  | 2.96E-09 |
| 3468 | cg14645650 | RUNX3   | -0.12 | 1.46E-09 |
| 3469 | cg04757093 | RUNX3   | -0.13 | 9.93E-14 |
| 3470 | cg18231267 | RUNX3   | -0.16 | 4.98E-10 |
| 3471 | cg25178645 | RUNX3   | -0.16 | 9.70E-11 |
| 3472 | cg27360282 | RUNX3   | -0.17 | 4.48E-11 |
| 3473 | cg02723372 | RUNX3   | -0.21 | 6.50E-17 |
| 3474 | cg14182690 | RUNX3   | -0.24 | 5.33E-13 |
| 3475 | cg10364513 | RXRG    | 0.20  | 7.68E-08 |
| 3476 | cg19764418 | RYR2    | -0.14 | 5.48E-07 |
| 3477 | cg20847746 | S100A1  | -0.16 | 1.07E-09 |
| 3478 | cg10795646 | S100A10 | -0.10 | 1.04E-04 |
| 3479 | cg02813121 | S100A12 | -0.36 | 7.10E-26 |
| 3480 | cg06615154 | S100A3  | -0.20 | 6.72E-10 |
| 3481 | cg07426848 | S100A3  | -0.30 | 1.75E-17 |
| 3482 | cg17250929 | S100A5  | -0.19 | 1.21E-11 |
| 3483 | cg24898863 | S100A8  | -0.11 | 5.83E-20 |
| 3484 | cg20070090 | S100A8  | -0.21 | 1.09E-20 |
| 3485 | cg07039113 | S100A9  | -0.16 | 3.68E-06 |
| 3486 | cg07685786 | S100B   | -0.11 | 4.48E-06 |
| 3487 | cg08205865 | SAC     | -0.12 | 4.60E-13 |
| 3488 | cg08118311 | SALL3   | 0.33  | 3.28E-14 |
| 3489 | cg15191648 | SALL3   | 0.27  | 3.25E-10 |
| 3490 | cg06303238 | SALL4   | 0.12  | 2.24E-05 |
| 3491 | cg21122774 | SARDH   | -0.14 | 5.70E-08 |
| 3492 | cg23887396 | SARM1   | 0.26  | 2.32E-14 |
| 3493 | cg09025324 | SART2   | 0.28  | 3.17E-17 |
| 3494 | cg17981339 | SBEM    | -0.12 | 5.36E-07 |
| 3495 | cg27160701 | SBEM    | -0.13 | 3.58E-09 |

|      |            |         |       |          |
|------|------------|---------|-------|----------|
| 3496 | cg23680518 | SBSN    | -0.21 | 1.41E-13 |
| 3497 | cg27050793 | SBSN    | -0.23 | 3.17E-17 |
| 3498 | cg17866455 | SCAND2  | -0.11 | 2.09E-07 |
| 3499 | cg05106502 | SCAP1   | -0.19 | 1.54E-08 |
| 3500 | cg14785479 | SCARF2  | 0.17  | 9.37E-06 |
| 3501 | cg22886089 | SCG3    | 0.14  | 1.34E-08 |
| 3502 | cg01772980 | SCGB1D1 | -0.23 | 3.78E-21 |
| 3503 | cg13916742 | SCGB1D1 | -0.28 | 4.29E-19 |
| 3504 | cg10848367 | SCGB1D2 | -0.12 | 2.36E-13 |
| 3505 | cg26041297 | SCGB1D2 | -0.15 | 1.21E-20 |
| 3506 | cg08459368 | SCGB2A1 | -0.24 | 1.96E-16 |
| 3507 | cg14741922 | SCGB2A2 | -0.13 | 8.39E-09 |
| 3508 | cg22862656 | SCGB2A2 | -0.24 | 5.52E-15 |
| 3509 | cg14472601 | SCGB3A1 | -0.23 | 2.08E-12 |
| 3510 | cg19530885 | SCGB3A2 | -0.16 | 3.41E-10 |
| 3511 | cg16954341 | SCGN    | 0.17  | 2.88E-08 |
| 3512 | cg15457899 | SCN3B   | 0.30  | 9.04E-14 |
| 3513 | cg13765785 | SCN3B   | 0.16  | 5.62E-07 |
| 3514 | cg23722792 | SCN4A   | -0.12 | 4.17E-08 |
| 3515 | cg13694749 | SCN4A   | -0.35 | 1.37E-20 |
| 3516 | cg27560864 | SCN4B   | 0.14  | 1.77E-07 |
| 3517 | cg25995212 | SCN7A   | -0.20 | 7.21E-14 |
| 3518 | cg26215727 | SCNN1A  | 0.11  | 9.67E-07 |
| 3519 | cg13365761 | SCNN1G  | 0.17  | 8.44E-06 |
| 3520 | cg01857260 | SCRL    | 0.16  | 2.34E-08 |
| 3521 | cg09697795 | SCRL    | 0.12  | 5.58E-05 |
| 3522 | cg10639440 | SCRN1   | 0.22  | 1.60E-08 |
| 3523 | cg01200060 | SCRT2   | 0.18  | 3.12E-09 |
| 3524 | cg15250797 | SCTR    | 0.21  | 2.79E-10 |
| 3525 | cg01897036 | SCTR    | -0.11 | 8.60E-05 |
| 3526 | cg26219051 | SCUBE1  | 0.28  | 1.38E-15 |
| 3527 | cg01081263 | SCUBE2  | 0.17  | 2.40E-07 |
| 3528 | cg19237879 | SCUBE2  | 0.16  | 1.19E-05 |
| 3529 | cg00347904 | SCUBE3  | 0.33  | 8.91E-16 |
| 3530 | cg10876928 | SDC4    | -0.14 | 3.36E-09 |
| 3531 | cg06352750 | SDPR    | 0.12  | 1.89E-03 |
| 3532 | cg09426307 | SEC14L3 | -0.11 | 1.05E-07 |
| 3533 | cg20831708 | SEC31L2 | -0.13 | 6.82E-04 |
| 3534 | cg02787991 | SECTM1  | 0.45  | 2.20E-24 |
| 3535 | cg10249734 | SECTM1  | 0.18  | 1.18E-13 |
| 3536 | cg24497819 | SELPLG  | 0.11  | 2.55E-06 |
| 3537 | cg08097657 | SEMA3B  | 0.11  | 3.62E-07 |
| 3538 | cg24816455 | SEMA3B  | -0.25 | 5.59E-18 |
| 3539 | cg14911395 | SEMA3B  | -0.34 | 5.56E-23 |
| 3540 | cg07640473 | SEMA3F  | 0.21  | 2.38E-06 |
| 3541 | cg22496652 | SEMA4D  | -0.11 | 1.62E-18 |
| 3542 | cg03702236 | SEMA5A  | 0.17  | 1.39E-05 |
| 3543 | cg12928668 | SEMA6A  | 0.12  | 1.00E-04 |
| 3544 | cg14093936 | SEMA7A  | 0.10  | 2.33E-06 |
| 3545 | cg02311163 | SEMG2   | -0.19 | 6.80E-18 |

|      |            |           |       |          |
|------|------------|-----------|-------|----------|
| 3546 | cg03312792 | SEMG2     | -0.27 | 9.85E-22 |
| 3547 | cg03135598 | SEPW1     | 0.11  | 1.39E-03 |
| 3548 | cg12078929 | SERHL     | 0.40  | 4.35E-25 |
| 3549 | cg03855656 | SERHL     | 0.17  | 3.91E-13 |
| 3550 | cg19663795 | SEPT1     | 0.13  | 3.89E-06 |
| 3551 | cg05788638 | SERPINA10 | -0.16 | 4.58E-08 |
| 3552 | cg08495878 | SERPINA4  | -0.11 | 2.20E-04 |
| 3553 | cg10025865 | SERPINA6  | -0.10 | 8.25E-05 |
| 3554 | cg11435943 | SERPINB12 | -0.19 | 1.42E-18 |
| 3555 | cg18121684 | SERPINB13 | -0.13 | 9.87E-08 |
| 3556 | cg24691255 | SERPINB2  | -0.21 | 1.15E-12 |
| 3557 | cg10533434 | SERPINB3  | -0.19 | 1.21E-20 |
| 3558 | cg15772361 | SERPINB3  | -0.28 | 3.31E-17 |
| 3559 | cg24546942 | SERPINB4  | -0.20 | 9.51E-18 |
| 3560 | cg15422147 | SERPINB5  | -0.17 | 1.73E-12 |
| 3561 | cg01568736 | SERPINB7  | -0.28 | 2.47E-20 |
| 3562 | cg01770400 | SERPINC1  | -0.17 | 2.72E-09 |
| 3563 | cg02523400 | SERPIND1  | -0.12 | 1.04E-05 |
| 3564 | cg27596068 | SERPINH1  | -0.12 | 3.50E-11 |
| 3565 | cg04809136 | SF3B14    | 0.53  | 1.49E-33 |
| 3566 | cg03421300 | SFN       | -0.11 | 1.54E-06 |
| 3567 | cg11354906 | SFRP2     | 0.14  | 4.20E-07 |
| 3568 | cg20019546 | SFRP4     | 0.27  | 4.17E-12 |
| 3569 | cg19166347 | SFRP4     | 0.14  | 2.00E-06 |
| 3570 | cg06692050 | SFRP5     | 0.14  | 3.07E-07 |
| 3571 | cg11206634 | SFT2D3    | -0.11 | 9.22E-04 |
| 3572 | cg26394380 | SFTPFB    | -0.16 | 7.11E-12 |
| 3573 | cg08458487 | SFTPD     | -0.15 | 3.70E-11 |
| 3574 | cg03600318 | SFTPD     | -0.15 | 1.01E-13 |
| 3575 | cg04582295 | SGCA      | -0.21 | 5.89E-14 |
| 3576 | cg23653712 | SGCB      | 0.16  | 2.80E-06 |
| 3577 | cg04435420 | SGCD      | -0.15 | 4.75E-09 |
| 3578 | cg03811411 | SGCD      | -0.20 | 9.52E-09 |
| 3579 | cg07126559 | SGCG      | -0.21 | 6.96E-16 |
| 3580 | cg17463527 | SGK2      | -0.12 | 1.32E-09 |
| 3581 | cg21685427 | SGK2      | -0.16 | 5.44E-09 |
| 3582 | cg15787039 | SGNE1     | 0.28  | 3.78E-28 |
| 3583 | cg16884042 | SGPP2     | 0.13  | 2.87E-05 |
| 3584 | cg26379475 | SH2D1B    | -0.12 | 8.83E-08 |
| 3585 | cg12499211 | SH2D2A    | -0.12 | 6.21E-04 |
| 3586 | cg20839149 | SH2D2A    | -0.17 | 3.39E-09 |
| 3587 | cg01414934 | SH3BGRL3  | 0.11  | 2.24E-05 |
| 3588 | cg08822227 | SH3BP2    | 0.24  | 3.70E-21 |
| 3589 | cg07991621 | SH3BP2    | 0.11  | 6.24E-11 |
| 3590 | cg22946150 | SH3GL3    | 0.17  | 1.17E-04 |
| 3591 | cg07816074 | SH3TC1    | -0.12 | 9.47E-06 |
| 3592 | cg21825027 | SH3YL1    | 0.56  | 3.83E-29 |
| 3593 | cg11801011 | SHANK1    | -0.21 | 5.14E-12 |
| 3594 | cg24824840 | SHANK1    | -0.29 | 4.71E-19 |
| 3595 | cg04396791 | SHANK2    | 0.14  | 4.39E-11 |



|      |            |          |       |          |
|------|------------|----------|-------|----------|
| 3596 | cg10362475 | SHANK2   | 0.12  | 1.31E-10 |
| 3597 | cg18581445 | SHD      | 0.19  | 4.18E-07 |
| 3598 | cg09381003 | SHKBP1   | 0.27  | 5.74E-14 |
| 3599 | cg21022395 | SHOC2    | 0.12  | 4.70E-07 |
| 3600 | cg06156376 | SHOX2    | 0.18  | 7.54E-06 |
| 3601 | cg17191178 | SHOX2    | 0.17  | 8.00E-09 |
| 3602 | cg18149919 | SIAHBP1  | -0.23 | 4.96E-13 |
| 3603 | cg03597525 | SIGLEC10 | -0.22 | 2.54E-16 |
| 3604 | cg03283694 | SIGLEC11 | -0.13 | 1.81E-12 |
| 3605 | cg24311282 | SIGLEC11 | -0.24 | 4.85E-14 |
| 3606 | cg12530021 | SIGLEC12 | -0.17 | 3.57E-14 |
| 3607 | cg18986165 | SIGLEC12 | -0.35 | 2.05E-19 |
| 3608 | cg01193293 | SIGLEC7  | -0.23 | 6.96E-20 |
| 3609 | cg23458892 | SIGLEC7  | -0.28 | 7.25E-22 |
| 3610 | cg04164824 | SIGLEC9  | -0.14 | 9.40E-18 |
| 3611 | cg13407883 | SIGLEC9  | -0.30 | 3.92E-21 |
| 3612 | cg11540692 | SIM1     | 0.25  | 3.86E-15 |
| 3613 | cg26668713 | SIPA1    | 0.10  | 1.11E-02 |
| 3614 | cg09577651 | SIRPB1   | -0.18 | 1.09E-15 |
| 3615 | cg11061975 | SIRPB2   | -0.28 | 2.83E-21 |
| 3616 | cg25737664 | SIRPD    | -0.29 | 8.13E-20 |
| 3617 | cg03310469 | SIX2     | 0.14  | 2.96E-05 |
| 3618 | cg13163729 | SIX3     | 0.13  | 2.13E-06 |
| 3619 | cg19456540 | SIX6     | 0.24  | 6.27E-08 |
| 3620 | cg02794695 | SLA      | -0.18 | 1.41E-07 |
| 3621 | cg08996413 | SLA      | -0.27 | 2.15E-21 |
| 3622 | cg19283196 | SLC10A4  | 0.36  | 1.67E-19 |
| 3623 | cg08209133 | SLC10A4  | 0.27  | 8.11E-14 |
| 3624 | cg07719512 | SLC11A1  | -0.13 | 1.98E-08 |
| 3625 | cg18854666 | SLC11A1  | -0.13 | 1.35E-07 |
| 3626 | cg14930674 | SLC12A1  | -0.26 | 8.72E-16 |
| 3627 | cg23656386 | SLC12A4  | 0.14  | 8.21E-08 |
| 3628 | cg02005755 | SLC13A4  | -0.18 | 6.73E-12 |
| 3629 | cg17589341 | SLC14A1  | -0.11 | 1.64E-07 |
| 3630 | cg21992250 | SLC15A3  | 0.33  | 3.14E-15 |
| 3631 | cg01172899 | SLC16A14 | 0.12  | 3.28E-04 |
| 3632 | cg14417329 | SLC16A3  | 0.23  | 3.53E-13 |
| 3633 | cg27619475 | SLC16A5  | 0.15  | 1.04E-12 |
| 3634 | cg09300114 | SLC16A5  | 0.12  | 2.96E-09 |
| 3635 | cg11879514 | SLC16A6  | 0.17  | 2.27E-07 |
| 3636 | cg20439022 | SLC16A8  | 0.22  | 4.32E-20 |
| 3637 | cg21627181 | SLC17A4  | -0.12 | 3.30E-05 |
| 3638 | cg06836849 | SLC17A8  | 0.16  | 1.01E-07 |
| 3639 | cg13857100 | SLC18A1  | -0.13 | 1.02E-10 |
| 3640 | cg00512279 | SLC18A2  | 0.11  | 1.29E-04 |
| 3641 | cg14008883 | SLC18A3  | 0.20  | 1.95E-08 |
| 3642 | cg06192619 | SLC1A6   | -0.18 | 8.12E-15 |
| 3643 | cg16377872 | SLC1A6   | -0.20 | 2.45E-13 |
| 3644 | cg27292431 | SLC22A1  | 0.18  | 6.85E-10 |
| 3645 | cg09326702 | SLC22A11 | -0.12 | 9.52E-06 |

|      |            |            |       |          |
|------|------------|------------|-------|----------|
| 3646 | cg22334665 | SLC22A16   | 0.30  | 1.52E-14 |
| 3647 | cg18521925 | SLC22A16   | -0.11 | 2.69E-07 |
| 3648 | cg01557297 | SLC22A17   | 0.18  | 2.26E-06 |
| 3649 | cg21019522 | SLC22A18   | 0.16  | 4.51E-16 |
| 3650 | cg19906550 | SLC22A18   | 0.15  | 3.79E-19 |
| 3651 | cg02719634 | SLC22A18AS | -0.12 | 1.79E-05 |
| 3652 | cg08999895 | SLC22A18AS | -0.27 | 2.14E-17 |
| 3653 | cg25313204 | SLC22A3    | -0.15 | 3.67E-04 |
| 3654 | cg12439773 | SLC22A6    | -0.12 | 3.59E-08 |
| 3655 | cg12348970 | SLC24A2    | -0.30 | 1.35E-23 |
| 3656 | cg00888479 | SLC24A3    | 0.11  | 5.82E-04 |
| 3657 | cg01557989 | SLC24A3    | 0.11  | 8.48E-05 |
| 3658 | cg19409156 | SLC24A5    | -0.19 | 4.26E-13 |
| 3659 | cg01497576 | SLC24A5    | -0.19 | 7.81E-10 |
| 3660 | cg15275890 | SLC25A17   | -0.17 | 1.78E-10 |
| 3661 | cg25152631 | SLC25A36   | 0.26  | 1.29E-09 |
| 3662 | cg25054311 | SLC26A2    | 0.12  | 8.81E-04 |
| 3663 | cg22294577 | SLC26A3    | -0.16 | 5.33E-11 |
| 3664 | cg09492887 | SLC26A5    | 0.25  | 5.66E-12 |
| 3665 | cg15674432 | SLC26A8    | 0.17  | 5.56E-11 |
| 3666 | cg23036025 | SLC27A5    | -0.10 | 8.69E-08 |
| 3667 | cg16107172 | SLC27A5    | -0.12 | 3.77E-05 |
| 3668 | cg01993576 | SLC29A1    | -0.17 | 3.16E-08 |
| 3669 | cg05168404 | SLC29A4    | -0.13 | 5.90E-06 |
| 3670 | cg26133068 | SLC2A11    | 0.11  | 5.71E-04 |
| 3671 | cg05521696 | SLC2A14    | 0.36  | 4.63E-21 |
| 3672 | cg13323752 | SLC2A14    | 0.31  | 2.54E-12 |
| 3673 | cg17142134 | SLC2A2     | -0.15 | 1.93E-07 |
| 3674 | cg24480859 | SLC2A5     | -0.13 | 4.73E-07 |
| 3675 | cg24027679 | SLC2A7     | -0.15 | 2.63E-09 |
| 3676 | cg08649013 | SLC2A9     | -0.13 | 2.85E-09 |
| 3677 | cg23338195 | SLC30A8    | -0.14 | 1.26E-11 |
| 3678 | cg10516359 | SLC35C1    | -0.22 | 3.48E-11 |
| 3679 | cg25437385 | SLC35F3    | 0.26  | 1.25E-08 |
| 3680 | cg22445920 | SLC36A3    | -0.22 | 1.23E-11 |
| 3681 | cg13265003 | SLC37A1    | -0.14 | 1.07E-11 |
| 3682 | cg26550234 | SLC39A12   | -0.16 | 2.46E-11 |
| 3683 | cg05254747 | SLC39A14   | -0.10 | 3.06E-04 |
| 3684 | cg02192965 | SLC3A1     | -0.13 | 2.39E-06 |
| 3685 | cg27336379 | SLC44A5    | -0.19 | 1.06E-09 |
| 3686 | cg23280807 | SLC5A11    | -0.12 | 1.13E-03 |
| 3687 | cg20092728 | SLC5A12    | -0.13 | 8.80E-09 |
| 3688 | cg21578906 | SLC5A4     | -0.27 | 2.47E-17 |
| 3689 | cg16232126 | SLC5A7     | 0.11  | 2.70E-04 |
| 3690 | cg22415472 | SLC5A7     | -0.12 | 2.95E-05 |
| 3691 | cg16005224 | SLC5A8     | -0.11 | 4.86E-05 |
| 3692 | cg09395732 | SLC6A11    | -0.19 | 3.97E-09 |
| 3693 | cg03064067 | SLC6A15    | 0.14  | 1.46E-05 |
| 3694 | cg19421752 | SLC6A18    | -0.22 | 7.61E-21 |
| 3695 | cg02064402 | SLC6A18    | -0.30 | 5.34E-19 |

|      |            |         |       |          |
|------|------------|---------|-------|----------|
| 3696 | cg04970117 | SLC6A20 | 0.28  | 2.02E-11 |
| 3697 | cg05016953 | SLC6A4  | 0.22  | 9.78E-10 |
| 3698 | cg21291896 | SLC6A6  | 0.24  | 3.33E-09 |
| 3699 | cg13763232 | SLC6A6  | -0.12 | 1.98E-08 |
| 3700 | cg19435264 | SLC6A7  | 0.23  | 2.45E-09 |
| 3701 | cg14424530 | SLC7A1  | 0.10  | 6.06E-03 |
| 3702 | cg06690548 | SLC7A11 | -0.22 | 1.33E-12 |
| 3703 | cg26907768 | SLC7A5  | 0.16  | 4.14E-09 |
| 3704 | cg24734575 | SLC7A9  | -0.11 | 8.73E-06 |
| 3705 | cg10807560 | SLC8A1  | -0.34 | 5.83E-25 |
| 3706 | cg22123464 | SLC8A2  | 0.19  | 1.75E-09 |
| 3707 | cg02748539 | SLC9A3  | 0.14  | 1.02E-05 |
| 3708 | cg09210315 | SLCO4A1 | -0.10 | 3.49E-07 |
| 3709 | cg27081230 | SLIC1   | -0.12 | 6.17E-09 |
| 3710 | cg27431150 | SLIC1   | -0.20 | 3.23E-10 |
| 3711 | cg18972811 | SLIT2   | 0.17  | 9.38E-06 |
| 3712 | cg09083627 | SLITRK5 | 0.25  | 3.32E-09 |
| 3713 | cg12237269 | SLN     | -0.17 | 1.04E-09 |
| 3714 | cg07441143 | SLURP1  | -0.18 | 1.33E-12 |
| 3715 | cg27508002 | SMAD9   | -0.17 | 1.23E-11 |
| 3716 | cg16194715 | SMAD9   | -0.22 | 1.39E-11 |
| 3717 | cg02827112 | SMARCD1 | 0.10  | 1.40E-03 |
| 3718 | cg09542291 | SMCP    | -0.17 | 6.30E-11 |
| 3719 | cg21948655 | SMCP    | -0.22 | 3.10E-13 |
| 3720 | cg10556064 | SMPD3   | 0.27  | 5.83E-25 |
| 3721 | cg15201635 | SMPD3   | 0.26  | 2.00E-11 |
| 3722 | cg00891541 | SMPD3   | 0.25  | 9.38E-24 |
| 3723 | cg19297232 | SMPD3   | 0.19  | 1.03E-19 |
| 3724 | cg25629694 | SMURF2  | 0.12  | 4.39E-08 |
| 3725 | cg05403071 | SNAI1   | 0.20  | 1.42E-07 |
| 3726 | cg07576541 | SNAPAP  | -0.12 | 6.50E-06 |
| 3727 | cg04747322 | SNCAIP  | 0.10  | 2.94E-05 |
| 3728 | cg09816471 | SNN     | 0.16  | 3.84E-06 |
| 3729 | cg22555495 | SNRPN   | -0.12 | 2.51E-06 |
| 3730 | cg19803984 | SNRPN   | -0.15 | 3.88E-14 |
| 3731 | cg16321029 | SNRPN   | -0.15 | 2.83E-13 |
| 3732 | cg15585987 | SNTG1   | -0.11 | 8.66E-08 |
| 3733 | cg20179697 | SNX9    | 0.17  | 1.50E-09 |
| 3734 | cg06220235 | SOCS1   | 0.30  | 1.07E-08 |
| 3735 | cg04797323 | SOCS2   | 0.35  | 2.82E-12 |
| 3736 | cg23412850 | SOCS2   | 0.33  | 2.11E-11 |
| 3737 | cg11738543 | SOCS2   | 0.27  | 1.20E-09 |
| 3738 | cg22125370 | SOCS2   | 0.18  | 2.38E-07 |
| 3739 | cg11225410 | SOCS2   | 0.10  | 8.27E-05 |
| 3740 | cg27637521 | SOCS3   | 0.13  | 1.12E-02 |
| 3741 | cg22264436 | SOST    | -0.20 | 2.24E-12 |
| 3742 | cg14256699 | SOST    | -0.27 | 1.27E-14 |
| 3743 | cg22303211 | SOX1    | 0.19  | 2.85E-15 |
| 3744 | cg20008332 | SOX11   | 0.13  | 2.84E-04 |
| 3745 | cg08432727 | SOX11   | 0.11  | 4.91E-04 |

|      |            |         |       |          |
|------|------------|---------|-------|----------|
| 3746 | cg03811478 | SOX14   | 0.21  | 2.22E-15 |
| 3747 | cg16428251 | SOX14   | 0.13  | 9.69E-05 |
| 3748 | cg02919422 | SOX17   | 0.20  | 7.16E-07 |
| 3749 | cg15105987 | SOX2    | 0.20  | 1.67E-15 |
| 3750 | cg19063972 | SOX21   | 0.20  | 5.57E-07 |
| 3751 | cg11208483 | SOX21   | 0.18  | 4.94E-15 |
| 3752 | cg06200339 | SOX30   | -0.10 | 1.26E-04 |
| 3753 | cg21530890 | SOX8    | 0.29  | 3.62E-12 |
| 3754 | cg27210136 | SP6     | -0.20 | 2.00E-17 |
| 3755 | cg23355492 | SP6     | -0.21 | 5.06E-13 |
| 3756 | cg05836145 | SP8     | 0.10  | 3.27E-05 |
| 3757 | cg13334277 | SPACA1  | -0.12 | 6.28E-04 |
| 3758 | cg26829529 | SPACA3  | -0.16 | 1.33E-22 |
| 3759 | cg11161417 | SPACA3  | -0.23 | 4.37E-25 |
| 3760 | cg15670863 | SPACA4  | -0.24 | 4.53E-17 |
| 3761 | cg25107903 | SPAG11  | -0.15 | 5.72E-19 |
| 3762 | cg19787037 | SPAG11  | -0.21 | 2.37E-25 |
| 3763 | cg04624659 | SPAG17  | 0.11  | 1.03E-05 |
| 3764 | cg08642068 | SPAG4L  | -0.13 | 3.88E-07 |
| 3765 | cg25802093 | SPAG6   | 0.41  | 1.66E-21 |
| 3766 | cg06908778 | SPAG6   | 0.32  | 5.59E-15 |
| 3767 | cg22724153 | SPAM1   | -0.13 | 5.10E-10 |
| 3768 | cg08331313 | SPARC   | 0.20  | 8.34E-11 |
| 3769 | cg01216369 | SPATA16 | -0.15 | 2.86E-08 |
| 3770 | cg06577725 | SPATA16 | -0.19 | 1.35E-11 |
| 3771 | cg09022993 | SPATA18 | 0.21  | 1.21E-10 |
| 3772 | cg04141379 | SPATA6  | 0.12  | 1.10E-04 |
| 3773 | cg01407341 | SPATA8  | -0.19 | 2.26E-12 |
| 3774 | cg02423618 | SPATA8  | -0.23 | 5.77E-22 |
| 3775 | cg22970435 | SPATS1  | 0.19  | 4.74E-07 |
| 3776 | cg17240454 | SPDEF   | -0.10 | 1.62E-07 |
| 3777 | cg04786857 | SPDY1   | 0.56  | 1.18E-41 |
| 3778 | cg06816106 | SPDY1   | 0.38  | 6.62E-18 |
| 3779 | cg18755783 | SPG20   | 0.23  | 2.41E-09 |
| 3780 | cg01917648 | SPIC    | -0.14 | 3.26E-12 |
| 3781 | cg04577715 | SPINK1  | -0.20 | 4.66E-09 |
| 3782 | cg04103317 | SPINK4  | -0.14 | 1.52E-10 |
| 3783 | cg27488807 | SPINK7  | -0.10 | 5.28E-11 |
| 3784 | cg23765993 | SPINLW1 | -0.13 | 9.30E-12 |
| 3785 | cg04868764 | SPINT1  | 0.32  | 8.05E-14 |
| 3786 | cg26531804 | SPINT1  | 0.28  | 5.89E-17 |
| 3787 | cg15375239 | SPINT2  | 0.50  | 6.56E-24 |
| 3788 | cg13301014 | SPINT2  | 0.30  | 2.22E-16 |
| 3789 | cg13888886 | SPO11   | -0.18 | 7.46E-16 |
| 3790 | cg12832649 | SPOCK   | 0.16  | 2.32E-05 |
| 3791 | cg10983208 | SPOCK2  | 0.23  | 6.58E-09 |
| 3792 | cg06101324 | SPRR1A  | -0.25 | 3.93E-30 |
| 3793 | cg04505023 | SPRR1A  | -0.37 | 3.71E-27 |
| 3794 | cg24884084 | SPRR1B  | -0.11 | 2.68E-13 |
| 3795 | cg18780284 | SPRR1B  | -0.35 | 4.73E-30 |

|      |            |            |       |          |
|------|------------|------------|-------|----------|
| 3796 | cg12891678 | SPRR2D     | -0.26 | 5.22E-33 |
| 3797 | cg08555657 | SPRR2E     | -0.27 | 4.55E-31 |
| 3798 | cg00152644 | SPRR2E     | -0.36 | 2.48E-28 |
| 3799 | cg25856811 | SPRR3      | -0.33 | 8.10E-33 |
| 3800 | cg04138756 | SPRR3      | -0.39 | 3.47E-30 |
| 3801 | cg02202484 | SPRR4      | -0.15 | 6.73E-13 |
| 3802 | cg08763351 | SPRR4      | -0.29 | 2.06E-17 |
| 3803 | cg22036988 | SPSB4      | 0.10  | 4.39E-04 |
| 3804 | cg15403517 | SRD5A2     | 0.31  | 1.77E-20 |
| 3805 | cg19502744 | SRD5A2     | 0.16  | 2.34E-03 |
| 3806 | cg02399455 | SRI        | -0.12 | 4.82E-06 |
| 3807 | cg03330516 | SRMS       | -0.25 | 3.58E-16 |
| 3808 | cg22285621 | SSH3       | -0.10 | 7.48E-05 |
| 3809 | cg27291231 | SSNA1      | -0.17 | 1.24E-09 |
| 3810 | cg24509668 | SSPN       | 0.10  | 3.25E-05 |
| 3811 | cg02164046 | SST        | 0.31  | 1.18E-14 |
| 3812 | cg14297029 | SSTR3      | -0.16 | 2.07E-10 |
| 3813 | cg10089145 | ST14       | 0.17  | 4.61E-04 |
| 3814 | cg15928398 | ST6GAL1    | 0.20  | 2.33E-11 |
| 3815 | cg25725843 | ST6GAL2    | 0.16  | 2.20E-08 |
| 3816 | cg08666623 | ST6GALNAC2 | 0.15  | 1.83E-06 |
| 3817 | cg21522303 | ST6GALNAC2 | 0.12  | 1.17E-06 |
| 3818 | cg26363196 | ST6GALNAC3 | 0.17  | 4.47E-08 |
| 3819 | cg20339230 | ST8SIA2    | 0.24  | 5.02E-09 |
| 3820 | cg19751300 | ST8SIA5    | 0.36  | 6.68E-19 |
| 3821 | cg23129478 | ST8SIA5    | 0.15  | 7.02E-08 |
| 3822 | cg17471928 | STAC2      | 0.14  | 6.05E-06 |
| 3823 | cg21309147 | STAC2      | 0.13  | 4.96E-05 |
| 3824 | cg08624068 | STARD6     | -0.14 | 9.45E-08 |
| 3825 | cg03001305 | STAT5A     | 0.12  | 2.04E-05 |
| 3826 | cg00436282 | STATH      | -0.11 | 3.20E-06 |
| 3827 | cg18320336 | STEAP1     | 0.16  | 1.97E-10 |
| 3828 | cg00564163 | STEAP4     | 0.30  | 3.31E-14 |
| 3829 | cg11271605 | STEAP4     | 0.27  | 1.10E-12 |
| 3830 | cg06782692 | STK32C     | 0.36  | 6.41E-14 |
| 3831 | cg07284558 | STK32C     | 0.17  | 1.15E-06 |
| 3832 | cg08788717 | STK33      | 0.14  | 1.95E-06 |
| 3833 | cg23326689 | STMN2      | 0.12  | 1.81E-04 |
| 3834 | cg08291098 | STMN3      | 0.29  | 6.61E-16 |
| 3835 | cg02130905 | STMN4      | -0.14 | 2.13E-10 |
| 3836 | cg25762706 | STMN4      | -0.16 | 1.31E-10 |
| 3837 | cg03712843 | STOML3     | -0.10 | 4.02E-09 |
| 3838 | cg25061755 | STON1      | -0.18 | 9.61E-11 |
| 3839 | cg10334928 | STON2      | 0.20  | 4.62E-13 |
| 3840 | cg06813842 | STRC       | -0.16 | 2.14E-14 |
| 3841 | cg15301694 | STRN3      | -0.11 | 1.52E-05 |
| 3842 | cg17328659 | STUB1      | 0.12  | 1.29E-03 |
| 3843 | cg06948294 | STXBP6     | 0.14  | 1.21E-07 |
| 3844 | cg00616129 | STYK1      | 0.13  | 2.42E-05 |
| 3845 | cg08088989 | SUHW1      | -0.17 | 7.86E-11 |

|      |            |         |       |          |
|------|------------|---------|-------|----------|
| 3846 | cg18530748 | SULT1A1 | 0.22  | 9.43E-07 |
| 3847 | cg15415545 | SULT1A3 | 0.40  | 9.03E-21 |
| 3848 | cg19450025 | SULT1A3 | 0.25  | 3.48E-14 |
| 3849 | cg10648113 | SULT1B1 | -0.11 | 2.38E-18 |
| 3850 | cg23163573 | SULT1C1 | -0.17 | 2.15E-16 |
| 3851 | cg10236239 | SULT1C2 | 0.14  | 1.48E-07 |
| 3852 | cg19139729 | SULT2A1 | -0.10 | 6.71E-07 |
| 3853 | cg00698688 | SULT2B1 | -0.13 | 1.11E-04 |
| 3854 | cg05472874 | SULT4A1 | 0.23  | 3.30E-08 |
| 3855 | cg16500334 | SUMO3   | 0.15  | 9.92E-05 |
| 3856 | cg25307641 | SURF2   | -0.11 | 7.44E-08 |
| 3857 | cg04230060 | SUSD1   | 0.16  | 2.19E-10 |
| 3858 | cg14862827 | SUSD1   | 0.13  | 1.99E-04 |
| 3859 | cg01705587 | SV2A    | 0.13  | 1.00E-06 |
| 3860 | cg18087477 | SYCP1   | 0.15  | 1.46E-05 |
| 3861 | cg17696091 | SYCP1   | -0.19 | 3.29E-17 |
| 3862 | cg07347645 | SYCP2   | -0.15 | 1.22E-07 |
| 3863 | cg14304761 | SYK     | 0.19  | 7.95E-07 |
| 3864 | cg02608019 | SYK     | 0.16  | 1.97E-05 |
| 3865 | cg23447996 | SYK     | 0.15  | 9.92E-08 |
| 3866 | cg05801648 | SYK     | 0.15  | 1.24E-07 |
| 3867 | cg10025443 | SYK     | 0.14  | 3.13E-06 |
| 3868 | cg15873301 | SYN2    | 0.23  | 1.79E-09 |
| 3869 | cg16894211 | SYN3    | -0.12 | 1.15E-06 |
| 3870 | cg19713460 | SYNGR1  | 0.16  | 6.92E-05 |
| 3871 | cg15555014 | SYNGR2  | -0.10 | 1.71E-05 |
| 3872 | cg02519806 | SYNPO2  | 0.13  | 6.43E-04 |
| 3873 | cg07127957 | SYNPO2L | -0.13 | 3.10E-09 |
| 3874 | cg00902195 | SYT10   | 0.13  | 8.82E-06 |
| 3875 | cg23950724 | SYT10   | 0.10  | 8.50E-04 |
| 3876 | cg05715649 | SYT2    | -0.11 | 3.00E-08 |
| 3877 | cg12289045 | SYT3    | -0.10 | 4.27E-08 |
| 3878 | cg20239740 | SYT5    | 0.13  | 1.95E-05 |
| 3879 | cg05368341 | SYT6    | 0.11  | 2.45E-05 |
| 3880 | cg01806928 | SYT9    | 0.15  | 1.86E-06 |
| 3881 | cg17188046 | T       | 0.11  | 1.61E-03 |
| 3882 | cg17829936 | TAAR5   | -0.19 | 7.42E-10 |
| 3883 | cg23887102 | TAAR6   | -0.10 | 3.16E-06 |
| 3884 | cg26033710 | TACR1   | -0.11 | 1.70E-08 |
| 3885 | cg15278682 | TACR2   | -0.12 | 1.75E-06 |
| 3886 | cg26984805 | TACR2   | -0.23 | 8.13E-11 |
| 3887 | cg16076328 | TACSTD1 | 0.39  | 1.97E-22 |
| 3888 | cg16080552 | TACSTD2 | 0.20  | 1.05E-10 |
| 3889 | cg19797376 | TAL1    | 0.26  | 3.94E-15 |
| 3890 | cg23871659 | TANK    | 0.12  | 1.22E-08 |
| 3891 | cg18524091 | TAS1R2  | -0.14 | 9.04E-07 |
| 3892 | cg21731286 | TAS1R2  | -0.14 | 2.18E-10 |
| 3893 | cg12150401 | TAS2R16 | -0.25 | 6.16E-24 |
| 3894 | cg25608041 | TBC1D1  | 0.28  | 4.40E-27 |
| 3895 | cg12718562 | TBC1D21 | -0.31 | 4.55E-22 |

|      |            |          |       |          |
|------|------------|----------|-------|----------|
| 3896 | cg14532417 | TBC1D3   | -0.18 | 2.62E-19 |
| 3897 | cg04901273 | TBC1D3   | -0.18 | 3.05E-22 |
| 3898 | cg23350580 | TBC1D3C  | -0.21 | 7.79E-29 |
| 3899 | cg02601403 | TBC1D3C  | -0.27 | 7.94E-27 |
| 3900 | cg27574244 | TBCD     | 0.27  | 1.38E-13 |
| 3901 | cg22511633 | TBL2     | 0.20  | 5.80E-09 |
| 3902 | cg25548825 | TBX10    | -0.13 | 4.16E-10 |
| 3903 | cg26422060 | TBX10    | -0.16 | 6.17E-10 |
| 3904 | cg12163132 | TBX2     | 0.25  | 6.39E-15 |
| 3905 | cg13274713 | TBX2     | 0.12  | 9.63E-04 |
| 3906 | cg13870866 | TBX20    | 0.20  | 9.02E-09 |
| 3907 | cg02008154 | TBX20    | 0.18  | 1.66E-07 |
| 3908 | cg20209009 | TBX21    | 0.31  | 1.97E-11 |
| 3909 | cg26607785 | TBX21    | 0.22  | 4.66E-12 |
| 3910 | cg18536148 | TBX4     | 0.45  | 7.89E-21 |
| 3911 | cg03866607 | TBX4     | 0.19  | 2.60E-18 |
| 3912 | cg21907579 | TBX5     | 0.13  | 7.17E-05 |
| 3913 | cg14370448 | TBX6     | -0.12 | 8.15E-04 |
| 3914 | cg01293143 | TCEA2    | -0.10 | 5.76E-04 |
| 3915 | cg03943081 | TCERG1L  | 0.25  | 5.67E-10 |
| 3916 | cg16175725 | TCF1     | -0.11 | 3.21E-05 |
| 3917 | cg06444781 | TCF1     | -0.14 | 4.59E-06 |
| 3918 | cg14532519 | TCF20    | 0.12  | 8.50E-13 |
| 3919 | cg24215443 | TCF21    | 0.20  | 2.89E-09 |
| 3920 | cg24861272 | TCF8     | -0.11 | 4.78E-22 |
| 3921 | cg14127336 | TCL1A    | -0.23 | 2.54E-17 |
| 3922 | cg13771579 | TCL1B    | -0.13 | 1.10E-07 |
| 3923 | cg27504299 | TCL1B    | -0.32 | 3.65E-22 |
| 3924 | cg05023540 | TCL6     | -0.20 | 3.38E-35 |
| 3925 | cg20018806 | TCN1     | -0.20 | 1.78E-18 |
| 3926 | cg22407458 | TCP11    | 0.10  | 1.01E-10 |
| 3927 | cg24110050 | TCTEX1D1 | 0.34  | 1.07E-23 |
| 3928 | cg17819635 | TCTEX1D1 | 0.28  | 1.01E-19 |
| 3929 | cg08121954 | TDO2     | 0.11  | 2.76E-05 |
| 3930 | cg12277666 | TDRD5    | 0.23  | 5.74E-09 |
| 3931 | cg02915837 | TEAD4    | 0.14  | 2.75E-04 |
| 3932 | cg25829729 | TEB1     | -0.18 | 2.24E-12 |
| 3933 | cg26530497 | TEB1     | -0.18 | 5.12E-13 |
| 3934 | cg24813212 | TEKT2    | 0.24  | 2.15E-10 |
| 3935 | cg02016419 | TEKT3    | 0.15  | 6.91E-05 |
| 3936 | cg02545192 | TERT     | 0.27  | 4.26E-11 |
| 3937 | cg12439899 | TFAP2A   | 0.24  | 1.81E-11 |
| 3938 | cg25202471 | TFAP2A   | 0.19  | 5.77E-09 |
| 3939 | cg26372517 | TFAP2E   | 0.11  | 2.02E-02 |
| 3940 | cg02906238 | TFCP2L1  | 0.34  | 2.04E-13 |
| 3941 | cg18729973 | TFF1     | -0.22 | 1.19E-14 |
| 3942 | cg02643667 | TFF1     | -0.25 | 4.96E-17 |
| 3943 | cg11158374 | TFF2     | -0.27 | 5.35E-17 |
| 3944 | cg04806409 | TFF3     | -0.16 | 1.14E-07 |
| 3945 | cg20488657 | TFF3     | -0.22 | 1.19E-09 |

|      |            |         |       |          |
|------|------------|---------|-------|----------|
| 3946 | cg23141855 | TFPI2   | 0.11  | 3.26E-05 |
| 3947 | cg10681065 | TFR2    | -0.11 | 1.19E-04 |
| 3948 | cg15526708 | TGFBR1  | 0.12  | 2.44E-06 |
| 3949 | cg00563926 | TGFBR3  | 0.13  | 1.46E-06 |
| 3950 | cg27496506 | TGM5    | -0.23 | 1.28E-16 |
| 3951 | cg23278885 | TGM6    | -0.24 | 2.33E-17 |
| 3952 | cg05912121 | TH      | -0.18 | 3.41E-11 |
| 3953 | cg08573687 | TH      | -0.26 | 4.17E-12 |
| 3954 | cg13798289 | THAP11  | -0.16 | 2.32E-11 |
| 3955 | cg18110483 | THBS4   | 0.16  | 2.23E-07 |
| 3956 | cg27465849 | THEDC1  | -0.20 | 1.23E-13 |
| 3957 | cg18338296 | THRSP   | 0.14  | 2.84E-05 |
| 3958 | cg09174741 | THSD1   | -0.12 | 1.03E-21 |
| 3959 | cg07965823 | THSD3   | 0.28  | 3.68E-11 |
| 3960 | cg06469542 | THSD3   | 0.11  | 9.10E-04 |
| 3961 | cg12508624 | THY1    | 0.18  | 4.15E-07 |
| 3962 | cg21633698 | THY1    | -0.13 | 4.76E-06 |
| 3963 | cg04807655 | TIAM1   | 0.15  | 1.45E-05 |
| 3964 | cg15853125 | TIAM1   | 0.12  | 7.71E-04 |
| 3965 | cg20925955 | TIAM2   | -0.13 | 3.53E-06 |
| 3966 | cg09837169 | TIAM2   | -0.14 | 5.49E-07 |
| 3967 | cg18994063 | TIMD4   | -0.13 | 2.96E-10 |
| 3968 | cg03870261 | TIMM13  | 0.12  | 1.48E-03 |
| 3969 | cg24080529 | TIMP3   | -0.16 | 2.10E-10 |
| 3970 | cg14869028 | TINAGL1 | 0.32  | 3.10E-18 |
| 3971 | cg22855405 | TINAGL1 | 0.30  | 1.42E-13 |
| 3972 | cg27022827 | TJP3    | -0.17 | 3.47E-09 |
| 3973 | cg05745457 | TKTL2   | -0.12 | 3.78E-08 |
| 3974 | cg16413535 | TKTL2   | -0.19 | 3.79E-10 |
| 3975 | cg15915418 | TLE1    | 0.25  | 3.71E-12 |
| 3976 | cg08794763 | TLE6    | -0.20 | 2.31E-11 |
| 3977 | cg23181434 | TLK2    | -0.14 | 1.56E-12 |
| 3978 | cg25720804 | TLX3    | 0.53  | 1.66E-26 |
| 3979 | cg25942450 | TLX3    | 0.41  | 2.66E-22 |
| 3980 | cg08124030 | TM4SF1  | 0.11  | 1.31E-02 |
| 3981 | cg23713520 | TM4SF11 | 0.22  | 1.50E-08 |
| 3982 | cg05556202 | TM4SF19 | -0.13 | 1.24E-06 |
| 3983 | cg05445326 | TM4SF19 | -0.13 | 1.68E-07 |
| 3984 | cg20683151 | TM4SF20 | -0.20 | 1.24E-12 |
| 3985 | cg14696396 | TM6SF1  | 0.19  | 4.69E-06 |
| 3986 | cg20277416 | TM7SF2  | -0.11 | 5.15E-04 |
| 3987 | cg03243506 | TMC2    | -0.19 | 5.20E-11 |
| 3988 | cg19290962 | TMC2    | -0.28 | 2.50E-18 |
| 3989 | cg25690265 | TMC5    | -0.12 | 1.07E-06 |
| 3990 | cg19056418 | TMC8    | -0.13 | 6.85E-06 |
| 3991 | cg03998348 | TMCO5   | -0.15 | 5.41E-12 |
| 3992 | cg22775000 | TMEFF1  | 0.33  | 1.01E-11 |
| 3993 | cg15075170 | TMEFF1  | 0.12  | 1.91E-03 |
| 3994 | cg06825166 | TMEM10  | -0.25 | 9.00E-14 |
| 3995 | cg14782678 | TMEM102 | -0.13 | 2.45E-04 |



|      |            |           |       |          |
|------|------------|-----------|-------|----------|
| 3996 | cg04482110 | TMEM106A  | 0.12  | 1.44E-02 |
| 3997 | cg10735607 | TMEM109   | -0.14 | 9.95E-06 |
| 3998 | cg16708012 | TMEM119   | 0.12  | 9.39E-12 |
| 3999 | cg23886551 | TMEM121   | 0.14  | 2.03E-05 |
| 4000 | cg04355435 | TMEM125   | 0.24  | 4.46E-11 |
| 4001 | cg02089348 | TMEM129   | -0.17 | 5.45E-08 |
| 4002 | cg21505886 | TMEM129   | -0.17 | 7.66E-08 |
| 4003 | cg19372178 | TMEM16G   | -0.19 | 8.01E-17 |
| 4004 | cg02672493 | TMEM22    | 0.14  | 7.52E-04 |
| 4005 | cg20001829 | TMEM25    | 0.15  | 4.96E-06 |
| 4006 | cg21706946 | TMEM40    | -0.14 | 1.52E-08 |
| 4007 | cg03534410 | TMEM40    | -0.19 | 8.73E-13 |
| 4008 | cg05385377 | TMEM51    | 0.11  | 2.27E-03 |
| 4009 | cg06179485 | TMEM54    | 0.13  | 4.90E-07 |
| 4010 | cg20955688 | TMEM71    | -0.12 | 1.61E-05 |
| 4011 | cg27159719 | TMEM71    | -0.15 | 1.16E-13 |
| 4012 | cg26457013 | TMEM86B   | -0.14 | 2.18E-05 |
| 4013 | cg01076838 | TMEM86B   | -0.25 | 5.66E-17 |
| 4014 | cg26912636 | TMEPAI    | -0.20 | 2.50E-14 |
| 4015 | cg00138126 | TMEPAI    | -0.27 | 1.23E-21 |
| 4016 | cg13486556 | TMOD2     | 0.10  | 9.28E-04 |
| 4017 | cg19686152 | TMOD3     | -0.10 | 1.15E-08 |
| 4018 | cg24901042 | TMPRSS2   | 0.14  | 1.03E-04 |
| 4019 | cg11484872 | TNF       | -0.21 | 1.88E-17 |
| 4020 | cg04425624 | TNF       | -0.24 | 1.32E-12 |
| 4021 | cg20368904 | TNFAIP2   | 0.15  | 1.57E-14 |
| 4022 | cg26530341 | TNFRSF10A | -0.15 | 1.02E-06 |
| 4023 | cg27090216 | TNFRSF10C | 0.37  | 4.62E-15 |
| 4024 | cg05636175 | TNFRSF10C | 0.27  | 6.27E-16 |
| 4025 | cg14015044 | TNFRSF10C | 0.23  | 4.49E-09 |
| 4026 | cg02938601 | TNFRSF10C | 0.18  | 2.64E-10 |
| 4027 | cg16175263 | TNFRSF10C | 0.16  | 8.82E-09 |
| 4028 | cg01407244 | TNFRSF10C | 0.11  | 9.40E-07 |
| 4029 | cg18152830 | TNFRSF13B | -0.19 | 7.23E-13 |
| 4030 | cg23274244 | TNFRSF13B | -0.22 | 2.82E-14 |
| 4031 | cg00504595 | TNFRSF19  | -0.11 | 1.53E-13 |
| 4032 | cg26189983 | TNFRSF1B  | 0.10  | 6.82E-03 |
| 4033 | cg23867494 | TNFRSF4   | -0.13 | 4.28E-05 |
| 4034 | cg22335801 | TNFRSF4   | -0.20 | 1.19E-08 |
| 4035 | cg08840010 | TNFRSF9   | -0.12 | 4.17E-11 |
| 4036 | cg21094154 | TNFSF11   | -0.13 | 1.75E-08 |
| 4037 | cg16517394 | TNFSF4    | 0.14  | 8.83E-08 |
| 4038 | cg10861599 | TNFSF4    | 0.13  | 1.22E-07 |
| 4039 | cg01186777 | TNFSF9    | 0.26  | 1.00E-09 |
| 4040 | cg21295911 | TNFSF9    | 0.25  | 3.04E-10 |
| 4041 | cg20950277 | TNIP3     | -0.16 | 1.19E-13 |
| 4042 | cg01962086 | TNK2      | 0.16  | 7.26E-06 |
| 4043 | cg11688469 | TNNI1     | -0.10 | 2.94E-06 |
| 4044 | cg12114524 | TNNI1     | -0.31 | 5.30E-22 |
| 4045 | cg14672680 | TNNI2     | -0.14 | 3.15E-10 |

|      |            |         |       |          |
|------|------------|---------|-------|----------|
| 4046 | cg18330203 | TNNT2   | -0.17 | 3.81E-08 |
| 4047 | cg19642007 | TNNT3   | -0.32 | 7.05E-19 |
| 4048 | cg13980719 | TNP1    | -0.10 | 5.95E-05 |
| 4049 | cg10376763 | TNP1    | -0.14 | 3.52E-07 |
| 4050 | cg10331038 | TNR     | -0.20 | 2.76E-14 |
| 4051 | cg26050734 | TNRC4   | 0.11  | 5.98E-06 |
| 4052 | cg13823701 | TNXB    | -0.11 | 1.07E-07 |
| 4053 | cg22424444 | TOLLIP  | -0.23 | 8.72E-15 |
| 4054 | cg12188860 | TOP1MT  | -0.32 | 5.76E-20 |
| 4055 | cg22105022 | TOR2A   | -0.10 | 1.30E-06 |
| 4056 | cg04391111 | TP73    | 0.23  | 6.28E-07 |
| 4057 | cg00565688 | TP73    | 0.12  | 9.40E-03 |
| 4058 | cg27472295 | TPBG    | 0.11  | 1.90E-05 |
| 4059 | cg22484980 | TPCN2   | -0.11 | 1.03E-07 |
| 4060 | cg17691309 | TPM2    | 0.21  | 9.79E-10 |
| 4061 | cg24070292 | TPM2    | 0.11  | 1.71E-07 |
| 4062 | cg24490338 | TPM3    | -0.13 | 4.48E-07 |
| 4063 | cg10370591 | TPO     | -0.28 | 6.59E-26 |
| 4064 | cg16016036 | TPO     | -0.32 | 7.46E-22 |
| 4065 | cg27044702 | TPSAB1  | -0.13 | 2.51E-08 |
| 4066 | cg05873268 | TPSAB1  | -0.21 | 3.60E-20 |
| 4067 | cg08321330 | TPSB2   | -0.24 | 2.23E-20 |
| 4068 | cg03776850 | TPSD1   | -0.13 | 2.82E-12 |
| 4069 | cg01375871 | TPSD1   | -0.16 | 6.50E-17 |
| 4070 | cg15551881 | TRAF1   | 0.10  | 4.88E-06 |
| 4071 | cg08804892 | TRAK1   | 0.15  | 9.78E-10 |
| 4072 | cg24877842 | TRAK1   | 0.12  | 1.06E-11 |
| 4073 | cg01667702 | TRAPPC1 | 0.17  | 1.90E-10 |
| 4074 | cg01837574 | TRAPPC1 | 0.15  | 1.01E-10 |
| 4075 | cg06196379 | TREM1   | -0.18 | 1.26E-23 |
| 4076 | cg01980222 | TREM2   | -0.18 | 4.88E-13 |
| 4077 | cg20095587 | TREM2   | -0.39 | 1.17E-26 |
| 4078 | cg04454050 | TREML1  | -0.20 | 2.04E-11 |
| 4079 | cg01564343 | TREML1  | -0.28 | 1.07E-19 |
| 4080 | cg26928682 | TREML2  | -0.12 | 5.94E-07 |
| 4081 | cg01009664 | TRH     | 0.12  | 2.48E-04 |
| 4082 | cg15120497 | TRH     | -0.19 | 1.09E-07 |
| 4083 | cg26989103 | TRHR    | -0.13 | 1.40E-08 |
| 4084 | cg22268164 | TRHR    | -0.19 | 2.56E-17 |
| 4085 | cg12793610 | TRIM2   | 0.15  | 2.69E-11 |
| 4086 | cg13625403 | TRIM29  | -0.18 | 1.56E-13 |
| 4087 | cg00679556 | TRIM31  | -0.23 | 2.67E-17 |
| 4088 | cg10693071 | TRIM36  | 0.14  | 1.43E-06 |
| 4089 | cg09312149 | TRIM36  | 0.13  | 2.91E-05 |
| 4090 | cg12242338 | TRIM42  | -0.25 | 3.27E-16 |
| 4091 | cg15495837 | TRIM43  | -0.17 | 1.01E-19 |
| 4092 | cg02284188 | TRIM49  | -0.22 | 2.61E-25 |
| 4093 | cg03882305 | TRIM50C | 0.18  | 6.48E-11 |
| 4094 | cg04962134 | TRIM51  | -0.32 | 1.94E-33 |
| 4095 | cg07533148 | TRIM58  | 0.34  | 1.29E-11 |

|      |            |         |       |          |
|------|------------|---------|-------|----------|
| 4096 | cg10273210 | TRIM59  | 0.22  | 4.17E-08 |
| 4097 | cg23704082 | TRIM59  | 0.14  | 4.08E-05 |
| 4098 | cg07485777 | TRIM60  | -0.17 | 1.76E-11 |
| 4099 | cg16051685 | TRIM63  | -0.15 | 1.21E-08 |
| 4100 | cg09079593 | TRIM7   | 0.12  | 1.93E-04 |
| 4101 | cg03361068 | TRIM9   | 0.10  | 2.52E-04 |
| 4102 | cg06493386 | TRPA1   | 0.17  | 2.66E-07 |
| 4103 | cg24794531 | TRPC1   | 0.29  | 4.23E-12 |
| 4104 | cg18474934 | TRPC3   | -0.15 | 1.31E-05 |
| 4105 | cg06812844 | TRPM2   | -0.16 | 5.87E-11 |
| 4106 | cg16832407 | TRPM3   | 0.30  | 1.14E-18 |
| 4107 | cg20555507 | TRPM3   | 0.22  | 1.32E-10 |
| 4108 | cg07882535 | TRPM5   | -0.17 | 9.44E-11 |
| 4109 | cg11474811 | TRPM5   | -0.26 | 1.53E-20 |
| 4110 | cg15746445 | TRPM8   | -0.18 | 1.81E-16 |
| 4111 | cg21312090 | TRPS1   | 0.14  | 2.12E-05 |
| 4112 | cg19615059 | TRPV4   | 0.18  | 1.61E-05 |
| 4113 | cg13628514 | TRPV4   | 0.16  | 3.10E-05 |
| 4114 | cg14269477 | TRPV5   | -0.14 | 1.50E-10 |
| 4115 | cg13675849 | TRPV5   | -0.23 | 2.09E-15 |
| 4116 | cg02786019 | TRPV6   | -0.13 | 2.10E-06 |
| 4117 | cg14153740 | TRY1    | -0.28 | 8.51E-22 |
| 4118 | cg26197220 | TSC22D1 | 0.30  | 2.75E-10 |
| 4119 | cg07758904 | TSCOT   | 0.18  | 1.02E-05 |
| 4120 | cg02332073 | TSGA13  | -0.16 | 2.17E-18 |
| 4121 | cg11058932 | TSGA13  | -0.20 | 3.31E-21 |
| 4122 | cg15089387 | TSLP    | 0.15  | 7.11E-06 |
| 4123 | cg19875656 | TSP50   | -0.16 | 3.36E-07 |
| 4124 | cg08831594 | TSPAN15 | 0.28  | 2.63E-12 |
| 4125 | cg12610070 | TSPAN15 | 0.12  | 4.47E-04 |
| 4126 | cg09390792 | TSPAN18 | -0.28 | 3.95E-18 |
| 4127 | cg06791867 | TSPAN18 | -0.30 | 6.96E-19 |
| 4128 | cg03614513 | TSPAN2  | 0.22  | 5.83E-10 |
| 4129 | cg06043114 | TSPAN2  | 0.12  | 1.79E-05 |
| 4130 | cg00041575 | TSPAN32 | -0.14 | 2.27E-08 |
| 4131 | cg17627559 | TSPAN32 | -0.15 | 1.74E-06 |
| 4132 | cg03116740 | TSPAN4  | -0.13 | 5.77E-08 |
| 4133 | cg11173246 | TSPAN4  | -0.16 | 1.76E-09 |
| 4134 | cg00622677 | TSPAN5  | 0.11  | 1.27E-04 |
| 4135 | cg15747595 | TSPYL5  | 0.38  | 2.47E-39 |
| 4136 | cg00186701 | TSPYL5  | 0.22  | 1.57E-16 |
| 4137 | cg16581199 | TSSK1   | -0.10 | 1.58E-06 |
| 4138 | cg23973000 | TSSK1   | -0.16 | 2.29E-12 |
| 4139 | cg02255609 | TTC4    | 0.16  | 1.40E-05 |
| 4140 | cg19584957 | TTLL10  | -0.21 | 8.42E-17 |
| 4141 | cg08137716 | TTLL6   | 0.15  | 1.16E-08 |
| 4142 | cg15480475 | TUB     | -0.14 | 2.30E-09 |
| 4143 | cg05492113 | TUB     | -0.21 | 1.40E-16 |
| 4144 | cg22675150 | TUBA2   | -0.12 | 3.08E-07 |
| 4145 | cg06437862 | TUBA2   | -0.31 | 7.36E-14 |

|      |            |         |       |          |
|------|------------|---------|-------|----------|
| 4146 | cg03462055 | TUBB2B  | 0.15  | 7.68E-06 |
| 4147 | cg23517605 | TUBB2B  | 0.15  | 9.12E-06 |
| 4148 | cg15669092 | TUBB3   | 0.13  | 1.54E-04 |
| 4149 | cg13494498 | TUBB3   | 0.11  | 8.45E-04 |
| 4150 | cg15677294 | TUBB4   | -0.19 | 7.49E-10 |
| 4151 | cg07307078 | TUBB6   | 0.24  | 1.05E-09 |
| 4152 | cg22467216 | TUBB6   | 0.15  | 1.83E-06 |
| 4153 | cg01036012 | TUBB8   | -0.13 | 5.06E-10 |
| 4154 | cg07908874 | TUBGCP2 | -0.12 | 2.90E-04 |
| 4155 | cg19353006 | TUSC3   | -0.21 | 1.14E-13 |
| 4156 | cg20052718 | TWIST1  | 0.22  | 1.28E-10 |
| 4157 | cg26312150 | TWIST1  | 0.19  | 5.01E-09 |
| 4158 | cg23435746 | TWSG1   | 0.15  | 6.22E-08 |
| 4159 | cg06243393 | TXNDC2  | -0.11 | 1.48E-06 |
| 4160 | cg05547500 | TXNDC2  | -0.12 | 5.21E-07 |
| 4161 | cg12099032 | TXNDC3  | -0.15 | 8.04E-09 |
| 4162 | cg15028436 | TXNDC3  | -0.20 | 1.33E-16 |
| 4163 | cg16069910 | TXNL6   | -0.14 | 3.38E-06 |
| 4164 | cg14366490 | TXNL6   | -0.18 | 4.93E-15 |
| 4165 | cg20267005 | TYROBP  | -0.12 | 3.24E-04 |
| 4166 | cg13578652 | UBASH3A | -0.14 | 4.19E-06 |
| 4167 | cg07326586 | UBD     | -0.10 | 3.72E-08 |
| 4168 | cg15320474 | UBD     | -0.17 | 5.78E-10 |
| 4169 | cg25421647 | UBE2L3  | 0.14  | 3.20E-05 |
| 4170 | cg25612480 | UBE2V2  | -0.34 | 2.04E-22 |
| 4171 | cg20092036 | UBE3B   | 0.11  | 6.66E-07 |
| 4172 | cg20492912 | UBE4A   | -0.11 | 1.95E-06 |
| 4173 | cg10241097 | UBL4B   | -0.17 | 2.10E-13 |
| 4174 | cg24346637 | UBL4B   | -0.29 | 1.86E-17 |
| 4175 | cg01369413 | UBQLN3  | -0.21 | 2.67E-12 |
| 4176 | cg24715245 | UCHL1   | 0.20  | 1.45E-07 |
| 4177 | cg08319991 | UCHL1   | 0.18  | 1.12E-09 |
| 4178 | cg04527918 | UCN     | 0.12  | 1.42E-04 |
| 4179 | cg20028470 | UCN     | 0.11  | 2.96E-04 |
| 4180 | cg20587968 | UCN3    | -0.19 | 7.85E-12 |
| 4181 | cg26644395 | UCN3    | -0.20 | 6.44E-18 |
| 4182 | cg14433673 | UCP2    | 0.38  | 8.72E-14 |
| 4183 | cg05205664 | UCP2    | 0.38  | 6.44E-14 |
| 4184 | cg11811840 | UGT1A1  | -0.13 | 5.59E-06 |
| 4185 | cg12385643 | UGT1A6  | -0.12 | 3.32E-06 |
| 4186 | cg23317501 | UGT3A1  | 0.13  | 4.49E-09 |
| 4187 | cg07084163 | UGT3A2  | 0.14  | 8.67E-10 |
| 4188 | cg25892041 | UGT8    | -0.14 | 4.27E-09 |
| 4189 | cg25589890 | ULBP1   | 0.24  | 6.30E-10 |
| 4190 | cg02409282 | ULBP1   | 0.15  | 1.11E-06 |
| 4191 | cg03985136 | ULBP2   | 0.18  | 9.55E-06 |
| 4192 | cg18418460 | ULBP3   | 0.12  | 1.43E-04 |
| 4193 | cg18071006 | ULBP3   | 0.11  | 1.58E-04 |
| 4194 | cg12324629 | ULK2    | 0.18  | 3.70E-21 |
| 4195 | cg25013053 | UNC45B  | -0.13 | 4.91E-09 |

|      |            |         |       |          |
|------|------------|---------|-------|----------|
| 4196 | cg22346765 | UNC5CL  | -0.15 | 2.08E-12 |
| 4197 | cg10725344 | UNQ1940 | -0.15 | 9.28E-12 |
| 4198 | cg10574499 | UNQ2446 | 0.25  | 4.56E-13 |
| 4199 | cg17074151 | UNQ2541 | -0.14 | 3.44E-12 |
| 4200 | cg16536450 | UNQ2541 | -0.21 | 1.84E-12 |
| 4201 | cg12315311 | UNQ3033 | -0.14 | 1.66E-19 |
| 4202 | cg01718139 | UNQ3033 | -0.18 | 1.98E-11 |
| 4203 | cg09082921 | UNQ3045 | 0.11  | 1.03E-04 |
| 4204 | cg21712685 | UNQ3045 | 0.10  | 2.66E-04 |
| 4205 | cg10305797 | UNQ467  | -0.21 | 4.72E-09 |
| 4206 | cg05241571 | UNQ467  | -0.27 | 1.70E-11 |
| 4207 | cg03003745 | UNQ473  | -0.13 | 5.27E-09 |
| 4208 | cg26222045 | UNQ5810 | -0.12 | 1.97E-05 |
| 4209 | cg23444894 | UNQ5810 | -0.14 | 1.69E-08 |
| 4210 | cg15944856 | UNQ6411 | -0.25 | 2.12E-18 |
| 4211 | cg00333226 | UNQ739  | 0.15  | 2.02E-06 |
| 4212 | cg01072821 | UNQ9391 | -0.20 | 2.13E-13 |
| 4213 | cg04057858 | UNQ9391 | -0.23 | 8.22E-16 |
| 4214 | cg17162024 | UNQ9433 | 0.22  | 2.76E-08 |
| 4215 | cg10613381 | UPB1    | -0.11 | 4.07E-05 |
| 4216 | cg02019333 | UPK1B   | -0.18 | 9.03E-11 |
| 4217 | cg19384697 | UPK3B   | 0.20  | 7.05E-13 |
| 4218 | cg22995176 | UPK3B   | 0.13  | 1.52E-07 |
| 4219 | cg21307628 | URB     | -0.16 | 2.23E-10 |
| 4220 | cg24088438 | URP2    | 0.15  | 1.13E-07 |
| 4221 | cg21289015 | USH1C   | 0.11  | 3.84E-04 |
| 4222 | cg24365013 | USH3A   | -0.13 | 4.93E-09 |
| 4223 | cg06910100 | USHBP1  | -0.10 | 2.65E-06 |
| 4224 | cg07499372 | USP29   | -0.11 | 1.14E-07 |
| 4225 | cg16547341 | USP29   | -0.15 | 9.85E-07 |
| 4226 | cg18886444 | USP4    | 0.13  | 3.80E-04 |
| 4227 | cg08742106 | USP6    | -0.18 | 1.88E-21 |
| 4228 | cg12954718 | USP6    | -0.18 | 3.96E-20 |
| 4229 | cg21273029 | UST     | 0.13  | 3.76E-06 |
| 4230 | cg09053680 | UTF1    | 0.47  | 9.69E-20 |
| 4231 | cg03755123 | UTF1    | 0.18  | 1.40E-06 |
| 4232 | cg10634115 | UTS2R   | 0.14  | 2.37E-13 |
| 4233 | cg20881054 | VASH1   | 0.31  | 8.14E-15 |
| 4234 | cg18489434 | VASH1   | 0.27  | 2.70E-12 |
| 4235 | cg26571739 | VAV1    | -0.13 | 1.53E-07 |
| 4236 | cg13470920 | VAV1    | -0.17 | 1.76E-08 |
| 4237 | cg24662718 | VAV3    | 0.31  | 2.85E-13 |
| 4238 | cg00263760 | VAX1    | 0.11  | 1.33E-03 |
| 4239 | cg02932669 | VGCNL1  | 0.24  | 6.62E-11 |
| 4240 | cg04084157 | VGF     | 0.17  | 1.81E-07 |
| 4241 | cg08097755 | VGF     | 0.16  | 1.71E-08 |
| 4242 | cg03160135 | VGLL2   | 0.19  | 7.03E-08 |
| 4243 | cg20916523 | VHL     | -0.12 | 3.31E-03 |
| 4244 | cg16869108 | VHL     | -0.13 | 9.87E-04 |
| 4245 | cg26113512 | VILL    | 0.32  | 2.15E-18 |

|      |            |         |       |          |
|------|------------|---------|-------|----------|
| 4246 | cg04660410 | VILL    | 0.21  | 2.57E-07 |
| 4247 | cg12874092 | VIM     | 0.40  | 7.64E-18 |
| 4248 | cg18349835 | VIPR2   | 0.32  | 8.29E-12 |
| 4249 | cg05523047 | VLDLR   | 0.14  | 7.47E-05 |
| 4250 | cg12457773 | VMP     | 0.11  | 3.49E-05 |
| 4251 | cg19554294 | VN1R2   | -0.11 | 2.03E-11 |
| 4252 | cg20832020 | VSIG9   | -0.11 | 4.78E-08 |
| 4253 | cg06151165 | VSX1    | 0.18  | 6.38E-07 |
| 4254 | cg04706338 | VTN     | -0.13 | 1.97E-08 |
| 4255 | cg14667273 | VWA1    | 0.13  | 1.48E-03 |
| 4256 | cg27347104 | VWF     | -0.15 | 4.44E-11 |
| 4257 | cg07744166 | WASF3   | 0.12  | 1.08E-05 |
| 4258 | cg17703554 | WDR21C  | -0.26 | 1.10E-25 |
| 4259 | cg01587454 | WDR21C  | -0.28 | 6.41E-18 |
| 4260 | cg07054641 | WDR52   | 0.23  | 4.86E-17 |
| 4261 | cg15044041 | WDR52   | 0.18  | 1.55E-15 |
| 4262 | cg24652919 | WDR58   | -0.15 | 8.16E-12 |
| 4263 | cg21577049 | WDR69   | 0.15  | 2.29E-07 |
| 4264 | cg26128092 | WDR8    | 0.29  | 1.98E-09 |
| 4265 | cg19135761 | WDR8    | 0.15  | 1.11E-07 |
| 4266 | cg25964007 | WDRPUH  | 0.14  | 1.63E-04 |
| 4267 | cg04420907 | WDRPUH  | 0.11  | 3.21E-04 |
| 4268 | cg23865698 | WFDC1   | -0.27 | 1.91E-26 |
| 4269 | cg00690280 | WFDC10B | -0.13 | 2.50E-09 |
| 4270 | cg22988566 | WFDC10B | -0.30 | 5.45E-21 |
| 4271 | cg18241647 | WFDC12  | -0.23 | 1.17E-14 |
| 4272 | cg20485165 | WFDC12  | -0.26 | 3.36E-21 |
| 4273 | cg09874776 | WFDC13  | -0.10 | 1.64E-05 |
| 4274 | cg14288464 | WFDC5   | -0.15 | 1.13E-12 |
| 4275 | cg24765446 | WFDC6   | -0.25 | 1.15E-24 |
| 4276 | cg22021786 | WFDC8   | -0.27 | 1.33E-12 |
| 4277 | cg12061127 | WFDC9   | -0.27 | 3.03E-14 |
| 4278 | cg10478221 | WFIKKN1 | 0.15  | 4.54E-09 |
| 4279 | cg19427610 | WIF1    | 0.12  | 2.54E-04 |
| 4280 | cg22637941 | WISP1   | -0.13 | 1.40E-03 |
| 4281 | cg03670238 | WISP1   | -0.15 | 6.44E-07 |
| 4282 | cg20985014 | WISP3   | -0.12 | 1.57E-09 |
| 4283 | cg20616414 | WNK2    | 0.44  | 2.62E-24 |
| 4284 | cg16158807 | WNK2    | 0.31  | 5.72E-15 |
| 4285 | cg05164634 | WNT10B  | 0.10  | 1.90E-03 |
| 4286 | cg21238457 | WNT11   | 0.26  | 2.99E-15 |
| 4287 | cg01830294 | WNT2    | 0.26  | 6.03E-15 |
| 4288 | cg15647515 | WNT2    | 0.11  | 1.25E-04 |
| 4289 | cg00625653 | WNT7A   | 0.23  | 8.30E-10 |
| 4290 | cg08603768 | WNT8A   | -0.12 | 8.50E-10 |
| 4291 | cg26109803 | WNT8B   | -0.14 | 5.29E-10 |
| 4292 | cg13641903 | WT1     | 0.15  | 7.61E-10 |
| 4293 | cg01442426 | XCR1    | -0.26 | 8.78E-17 |
| 4294 | cg10947146 | XKR6    | 0.30  | 3.71E-10 |
| 4295 | cg09485593 | XYLT1   | -0.15 | 1.30E-07 |

|      |            |         |       |          |
|------|------------|---------|-------|----------|
| 4296 | cg18342279 | ZAR1    | 0.41  | 4.32E-20 |
| 4297 | cg25298754 | ZBED2   | -0.15 | 6.92E-10 |
| 4298 | cg24323726 | ZBED2   | -0.20 | 2.85E-09 |
| 4299 | cg25101936 | ZBTB16  | 0.13  | 5.05E-06 |
| 4300 | cg13666729 | ZBTB8   | 0.28  | 8.10E-12 |
| 4301 | cg11619390 | ZBTB8   | 0.14  | 3.61E-05 |
| 4302 | cg10133777 | ZD52F10 | -0.14 | 2.52E-16 |
| 4303 | cg18429742 | ZDHHC11 | -0.15 | 3.85E-08 |
| 4304 | cg27654142 | ZFP2    | 0.15  | 2.96E-05 |
| 4305 | cg09339527 | ZFP2    | 0.12  | 4.94E-03 |
| 4306 | cg04862249 | ZFP3    | 0.25  | 4.77E-10 |
| 4307 | cg12680609 | ZFP41   | 0.51  | 1.94E-33 |
| 4308 | cg24641352 | ZFP41   | 0.11  | 1.26E-04 |
| 4309 | cg14456683 | ZIC1    | 0.28  | 9.70E-23 |
| 4310 | cg05073035 | ZIC1    | 0.25  | 4.97E-13 |
| 4311 | cg27519373 | ZIM2    | -0.14 | 2.40E-11 |
| 4312 | cg00354258 | ZIM2    | -0.15 | 7.74E-09 |
| 4313 | cg16519742 | ZIM2    | -0.16 | 4.22E-07 |
| 4314 | cg09837943 | ZIM2    | -0.17 | 2.57E-13 |
| 4315 | cg06244906 | ZIM2    | -0.27 | 6.44E-12 |
| 4316 | cg03421687 | ZMYND10 | 0.39  | 4.27E-13 |
| 4317 | cg23208152 | ZMYND10 | 0.35  | 9.37E-11 |
| 4318 | cg06088032 | ZMYND10 | 0.30  | 5.40E-09 |
| 4319 | cg20881888 | ZMYND10 | 0.27  | 5.54E-07 |
| 4320 | cg24832140 | ZNF114  | 0.14  | 1.78E-07 |
| 4321 | cg13877915 | ZNF132  | 0.14  | 8.56E-06 |
| 4322 | cg19776201 | ZNF132  | 0.12  | 5.26E-08 |
| 4323 | cg08849574 | ZNF134  | 0.17  | 1.48E-06 |
| 4324 | cg16638540 | ZNF135  | 0.25  | 1.22E-08 |
| 4325 | cg13714039 | ZNF14   | 0.11  | 2.67E-04 |
| 4326 | cg13108181 | ZNF141  | 0.18  | 2.63E-06 |
| 4327 | cg21790626 | ZNF154  | 0.58  | 2.86E-35 |
| 4328 | cg08668790 | ZNF154  | 0.52  | 6.60E-32 |
| 4329 | cg12586262 | ZNF160  | 0.17  | 1.57E-06 |
| 4330 | cg03712038 | ZNF160  | 0.14  | 5.41E-06 |
| 4331 | cg06566994 | ZNF167  | 0.12  | 2.74E-13 |
| 4332 | cg09643544 | ZNF177  | 0.31  | 1.38E-13 |
| 4333 | cg05250458 | ZNF177  | 0.13  | 1.20E-04 |
| 4334 | cg11706111 | ZNF19   | -0.10 | 1.16E-05 |
| 4335 | cg20880234 | ZNF198  | 0.15  | 7.47E-06 |
| 4336 | cg26014197 | ZNF206  | -0.12 | 2.41E-09 |
| 4337 | cg20055101 | ZNF206  | -0.14 | 1.16E-08 |
| 4338 | cg01614759 | ZNF22   | -0.13 | 1.72E-05 |
| 4339 | cg10604333 | ZNF222  | 0.11  | 6.80E-05 |
| 4340 | cg13885201 | ZNF23   | 0.19  | 4.32E-07 |
| 4341 | cg24680602 | ZNF232  | 0.21  | 7.31E-08 |
| 4342 | cg04825431 | ZNF239  | -0.29 | 1.86E-13 |
| 4343 | cg02286642 | ZNF254  | 0.30  | 4.13E-18 |
| 4344 | cg20176532 | ZNF256  | 0.11  | 1.25E-03 |
| 4345 | cg16636110 | ZNF264  | 0.17  | 2.69E-15 |

|      |            |         |       |          |
|------|------------|---------|-------|----------|
| 4346 | cg09429185 | ZNF286  | 0.15  | 5.29E-07 |
| 4347 | cg23423382 | ZNF287  | 0.18  | 9.62E-08 |
| 4348 | cg20850981 | ZNF323  | -0.17 | 1.02E-13 |
| 4349 | cg00275232 | ZNF342  | 0.12  | 5.84E-04 |
| 4350 | cg10224037 | ZNF354A | 0.12  | 1.69E-04 |
| 4351 | cg11538128 | ZNF354C | 0.19  | 9.72E-08 |
| 4352 | cg04488521 | ZNF354C | 0.11  | 6.98E-04 |
| 4353 | cg15591678 | ZNF365  | 0.12  | 2.61E-05 |
| 4354 | cg16449972 | ZNF423  | -0.20 | 2.26E-15 |
| 4355 | cg02238504 | ZNF423  | -0.22 | 2.44E-17 |
| 4356 | cg18129786 | ZNF445  | -0.32 | 7.90E-19 |
| 4357 | cg18888520 | ZNF447  | 0.14  | 5.33E-05 |
| 4358 | cg23037403 | ZNF454  | 0.18  | 2.73E-07 |
| 4359 | cg01184522 | ZNF496  | 0.33  | 2.93E-11 |
| 4360 | cg18793806 | ZNF514  | 0.17  | 2.82E-10 |
| 4361 | cg18680834 | ZNF536  | -0.13 | 3.36E-13 |
| 4362 | cg03555203 | ZNF537  | -0.21 | 1.45E-17 |
| 4363 | cg08458170 | ZNF537  | -0.33 | 2.02E-19 |
| 4364 | cg03975694 | ZNF540  | 0.40  | 3.18E-25 |
| 4365 | cg27389185 | ZNF540  | 0.27  | 8.37E-19 |
| 4366 | cg04391540 | ZNF541  | -0.12 | 1.94E-04 |
| 4367 | cg25886284 | ZNF545  | 0.29  | 1.45E-10 |
| 4368 | cg07054095 | ZNF549  | 0.14  | 9.86E-07 |
| 4369 | cg06458239 | ZNF549  | 0.13  | 2.11E-05 |
| 4370 | cg16014085 | ZNF553  | 0.23  | 2.48E-17 |
| 4371 | cg05221167 | ZNF560  | 0.27  | 4.00E-15 |
| 4372 | cg04062391 | ZNF560  | 0.20  | 2.25E-10 |
| 4373 | cg23968383 | ZNF572  | -0.18 | 1.55E-06 |
| 4374 | cg11719283 | ZNF574  | -0.13 | 8.63E-07 |
| 4375 | cg16731240 | ZNF577  | 0.13  | 2.93E-03 |
| 4376 | cg24333473 | ZNF597  | 0.12  | 3.88E-10 |
| 4377 | cg12259537 | ZNF606  | 0.19  | 2.05E-10 |
| 4378 | cg07703337 | ZNF610  | -0.19 | 1.21E-13 |
| 4379 | cg15062535 | ZNF610  | -0.20 | 1.08E-15 |
| 4380 | cg25776555 | ZNF614  | 0.10  | 8.77E-05 |
| 4381 | cg17892556 | ZNF625  | 0.28  | 1.61E-08 |
| 4382 | cg18267381 | ZNF659  | 0.12  | 4.93E-04 |
| 4383 | cg22598028 | ZNF660  | 0.34  | 3.93E-14 |
| 4384 | cg05508084 | ZNF667  | 0.25  | 1.65E-12 |
| 4385 | cg03289872 | ZNF667  | 0.13  | 6.80E-05 |
| 4386 | cg23857226 | ZNF671  | 0.18  | 9.43E-06 |
| 4387 | cg19246110 | ZNF671  | 0.14  | 1.04E-04 |
| 4388 | cg18335068 | ZNF677  | 0.10  | 1.69E-04 |
| 4389 | cg10705251 | ZNF683  | -0.11 | 9.58E-07 |
| 4390 | cg20845050 | ZNF7    | -0.12 | 1.60E-11 |
| 4391 | cg18440048 | ZNF70   | 0.12  | 1.28E-05 |
| 4392 | cg02440177 | ZNF702  | 0.33  | 2.98E-14 |
| 4393 | cg07559730 | ZNF702  | 0.16  | 1.55E-07 |
| 4394 | cg13334054 | ZNF80   | -0.11 | 1.19E-14 |
| 4395 | cg03109316 | ZNF80   | -0.37 | 2.87E-28 |



|      |            |         |       |          |
|------|------------|---------|-------|----------|
| 4396 | cg04386405 | ZNF83   | 0.20  | 1.25E-12 |
| 4397 | cg07706362 | ZNF91   | 0.11  | 4.15E-15 |
| 4398 | cg07660236 | ZNF96   | 0.25  | 3.17E-16 |
| 4399 | cg02622316 | ZNF96   | 0.17  | 2.47E-06 |
| 4400 | cg06590610 | ZNFN1A1 | -0.22 | 2.09E-11 |
| 4401 | cg03872376 | ZP4     | -0.22 | 3.74E-22 |
| 4402 | cg27094076 | ZPBP    | 0.12  | 1.90E-07 |
| 4403 | cg27183007 | ZPBP    | 0.12  | 1.38E-08 |
| 4404 | cg21331821 | ZSCAN1  | 0.13  | 1.81E-04 |
| 4405 | cg27276456 | ZSCAN4  | -0.20 | 1.51E-13 |
| 4406 | cg22262964 |         | -0.13 | 5.01E-19 |
| 4407 | cg14804557 |         | -0.14 | 2.26E-12 |
| 4408 | cg00718513 |         | -0.14 | 3.99E-18 |
| 4409 | cg11560645 |         | -0.15 | 1.19E-08 |
| 4410 | cg27348440 |         | -0.15 | 8.79E-10 |
| 4411 | cg16878021 |         | -0.18 | 4.07E-13 |
| 4412 | cg23663653 |         | -0.20 | 1.03E-15 |
| 4413 | cg23988567 |         | -0.20 | 4.97E-16 |
| 4414 | cg15051063 |         | -0.22 | 1.58E-10 |
| 4415 | cg10883352 |         | -0.23 | 8.36E-13 |
| 4416 | cg23984130 |         | -0.25 | 4.51E-22 |
