# Supplementary material for: Methylation Profiles Reveal Distinct Subgroup of Hepatocellular Carcinoma Patients with Poor Prognosis
Source: PubMed Central journal article supplement (PMC4122406; doi:10.1371/journal.pone.0104158), 2014-08-05
Supplement: pone.0104158.s012.pdf [file pone.0104158.s012.pdf]

Table S7. 536 genes with aberrant methylation and associated change of expression.

| No. | SYMBOL   | Infinium Probeset ID | Methylation Difference (T-NT) | FDR adjusted p-value (Methylation) | Illumina probeset ID | Expression Fold Change (T/NT) | FDR adjusted p-value (Expression) |
|-----|----------|----------------------|-------------------------------|------------------------------------|----------------------|-------------------------------|-----------------------------------|
| 1   | TSPYL5   | cg15747595           | 0.38                          | 2.47E-39                           | ILMN_1737972         | -1.32                         | 4.24E-08                          |
| 2   | LDHB     | cg06437004           | 0.49                          | 5.31E-32                           | ILMN_1728132         | -1.22                         | 2.47E-02                          |
| 3   | SH3YL1   | cg21825027           | 0.56                          | 3.83E-29                           | ILMN_1712231         | -1.43                         | 8.81E-09                          |
| 4   | CYB5R2   | cg03826976           | 0.30                          | 3.13E-25                           | ILMN_1739576         | -1.34                         | 9.62E-05                          |
| 5   | SPINT2   | cg15375239           | 0.50                          | 6.56E-24                           | ILMN_1800739         | -1.77                         | 9.87E-05                          |
| 6   | TCTEX1D1 | cg24110050           | 0.34                          | 1.07E-23                           | ILMN_1751868         | -1.59                         | 4.54E-07                          |
| 7   | GRASP    | cg04034767           | 0.45                          | 4.36E-23                           | ILMN_1705210         | -1.48                         | 4.69E-09                          |
| 8   | DOK1     | cg26117023           | 0.45                          | 2.56E-22                           | ILMN_1700086         | -1.20                         | 1.78E-04                          |
| 9   | KRTCAP3  | cg11618577           | 0.24                          | 2.90E-22                           | ILMN_1700728         | -1.86                         | 2.88E-11                          |
| 10  | PBX4     | cg19996355           | 0.37                          | 2.87E-21                           | ILMN_1700762         | -1.21                         | 3.03E-04                          |
| 11  | ULK2     | cg12324629           | 0.18                          | 3.70E-21                           | ILMN_1715482         | -1.21                         | 9.48E-07                          |
| 12  | GSTP1    | cg04920951           | 0.39                          | 7.19E-21                           | ILMN_1679809         | -1.84                         | 1.70E-08                          |
| 13  | SRD5A2   | cg15403517           | 0.31                          | 1.77E-20                           | ILMN_1788895         | -3.85                         | 1.18E-16                          |
| 14  | ADRA2B   | cg21542793           | 0.37                          | 2.47E-20                           | ILMN_1677868         | -1.38                         | 6.65E-13                          |
| 15  | PODN     | cg23092823           | 0.29                          | 1.24E-18                           | ILMN_1770800         | -1.29                         | 1.87E-04                          |
| 16  | RAB31    | cg17982102           | 0.36                          | 3.68E-18                           | ILMN_1660691         | -1.24                         | 7.13E-03                          |
| 17  | CFTR     | cg25509184           | 0.33                          | 1.14E-17                           | ILMN_1705813         | -2.03                         | 3.09E-11                          |
| 18  | GNA14    | cg17301902           | 0.32                          | 6.50E-17                           | ILMN_1686227         | -1.36                         | 8.36E-14                          |
| 19  | RNF135   | cg00948524           | 0.33                          | 8.97E-17                           | ILMN_1700660         | -1.24                         | 1.69E-07                          |
| 20  | NR1H3    | cg12613344           | 0.20                          | 1.46E-16                           | ILMN_1814022         | -1.33                         | 3.12E-08                          |
| 21  | HGFAC    | cg07364841           | 0.19                          | 2.82E-15                           | ILMN_1701468         | -8.28                         | 1.83E-22                          |
| 22  | WNT11    | cg21238457           | 0.26                          | 2.99E-15                           | ILMN_1662188         | -1.36                         | 3.79E-05                          |
| 23  | TNFAIP2  | cg20368904           | 0.15                          | 1.57E-14                           | ILMN_1727689         | -1.22                         | 3.72E-03                          |
| 24  | MASP1    | cg21831174           | 0.14                          | 2.44E-14                           | ILMN_1809537         | -2.65                         | 7.33E-23                          |
| 25  | LEP      | cg12782180           | 0.25                          | 3.57E-14                           | ILMN_2207505         | -1.36                         | 8.34E-06                          |
| 26  | GALNT14  | cg05714219           | 0.32                          | 4.22E-13                           | ILMN_1722524         | -1.40                         | 5.32E-12                          |
| 27  | APCDD1   | cg19264571           | 0.18                          | 4.22E-13                           | ILMN_1656951         | -1.35                         | 3.00E-04                          |
| 28  | SLC16A5  | cg27619475           | 0.15                          | 1.04E-12                           | ILMN_1755649         | -1.37                         | 9.52E-07                          |
| 29  | CD8A     | cg17108819           | 0.33                          | 1.32E-12                           | ILMN_1760374         | -1.23                         | 8.09E-04                          |
| 30  | ALDH1A3  | cg19177941           | 0.26                          | 2.36E-12                           | ILMN_1807439         | -1.47                         | 2.12E-06                          |
| 31  | SOCS2    | cg04797323           | 0.35                          | 2.82E-12                           | ILMN_1798926         | -2.58                         | 6.86E-14                          |
| 32  | SOX8     | cg21530890           | 0.29                          | 3.62E-12                           | ILMN_1789244         | -1.27                         | 7.02E-07                          |
| 33  | CHST4    | cg00840403           | 0.15                          | 3.76E-12                           | ILMN_1696590         | -2.33                         | 5.47E-12                          |
| 34  | CYGB     | cg17040807           | 0.17                          | 4.58E-12                           | ILMN_1758128         | -1.59                         | 3.69E-13                          |
| 35  | MYO10    | cg07862358           | 0.30                          | 6.02E-12                           | ILMN_2232712         | -1.30                         | 9.20E-11                          |
| 36  | CDKN1C   | cg20919799           | 0.34                          | 6.17E-12                           | ILMN_1718565         | -1.35                         | 1.09E-03                          |
| 37  | PTGS2    | cg13986130           | 0.19                          | 2.08E-11                           | ILMN_2054297         | -2.50                         | 6.04E-12                          |
| 38  | ST6GAL1  | cg15928398           | 0.20                          | 2.33E-11                           | ILMN_2384496         | -1.32                         | 6.44E-04                          |
| 39  | LRRC3    | cg23089840           | 0.17                          | 3.86E-11                           | ILMN_1795055         | -1.33                         | 3.32E-11                          |
| 40  | AKAP2    | cg15083233           | 0.21                          | 4.35E-11                           | ILMN_1675507         | -1.40                         | 1.87E-09                          |
| 41  | TMEM125  | cg04355435           | 0.24                          | 4.46E-11                           | ILMN_1685709         | -1.22                         | 1.04E-04                          |
| 42  | TACSTD2  | cg16080552           | 0.20                          | 1.05E-10                           | ILMN_1739001         | -3.41                         | 1.78E-11                          |
| 43  | HCLS1    | cg00141162           | 0.20                          | 1.14E-10                           | ILMN_1727402         | -1.67                         | 1.72E-05                          |
| 44  | SPATA18  | cg09022993           | 0.21                          | 1.21E-10                           | ILMN_1667948         | -1.86                         | 2.94E-15                          |
| 45  | ESPN     | cg13066963           | 0.22                          | 1.71E-10                           | ILMN_1806710         | -1.39                         | 2.46E-05                          |
| 46  | RBP1     | cg23363832           | 0.28                          | 2.43E-10                           | ILMN_1656837         | -2.92                         | 2.65E-10                          |
| 47  | HCN2     | cg06005396           | 0.17                          | 3.02E-10                           | ILMN_1659150         | -1.21                         | 1.53E-05                          |
| 48  | LTK      | cg27494383           | 0.19                          | 3.73E-10                           | ILMN_1799871         | -1.29                         | 1.71E-10                          |
| 49  | CD160    | cg12832565           | 0.11                          | 3.99E-10                           | ILMN_1742001         | -1.32                         | 3.98E-10                          |
| 50  | SLC22A1  | cg27292431           | 0.18                          | 6.85E-10                           | ILMN_1715742         | -5.52                         | 4.66E-16                          |
| 51  | TUBB6    | cg07307078           | 0.24                          | 1.05E-09                           | ILMN_1702636         | -1.22                         | 3.37E-03                          |
| 52  | SLC25A36 | cg25152631           | 0.26                          | 1.29E-09                           | ILMN_1766528         | -1.20                         | 6.72E-04                          |
| 53  | FGL2     | cg12271671           | 0.15                          | 1.76E-09                           | ILMN_1693009         | -1.63                         | 1.21E-08                          |
| 54  | SPG20    | cg18755783           | 0.23                          | 2.41E-09                           | ILMN_1801236         | -1.27                         | 2.57E-09                          |

|     |          |            |      |          |              |       |          |
|-----|----------|------------|------|----------|--------------|-------|----------|
| 55  | TCF21    | cg24215443 | 0.20 | 2.89E-09 | ILMN_1766712 | -1.28 | 3.14E-09 |
| 56  | ESR1     | cg07671949 | 0.22 | 2.90E-09 | ILMN_1678535 | -2.73 | 2.20E-20 |
| 57  | CFH      | cg24974599 | 0.11 | 3.45E-09 | ILMN_1810910 | -1.56 | 8.03E-05 |
| 58  | RCN3     | cg04378886 | 0.12 | 3.83E-09 | ILMN_1809850 | -1.21 | 1.73E-05 |
| 59  | FES      | cg18661868 | 0.20 | 3.88E-09 | ILMN_1693650 | -1.68 | 2.21E-09 |
| 60  | SLC7A5   | cg26907768 | 0.16 | 4.14E-09 | ILMN_1720373 | -1.27 | 7.47E-03 |
| 61  | ALOX5    | cg18809289 | 0.20 | 4.23E-09 | ILMN_1792150 | -1.38 | 3.08E-08 |
| 62  | UGT3A1   | cg23317501 | 0.13 | 4.49E-09 | ILMN_2133038 | -1.29 | 9.30E-03 |
| 63  | GIMAP5   | cg13043509 | 0.17 | 6.39E-09 | ILMN_1769383 | -1.21 | 1.01E-02 |
| 64  | GFPT2    | cg18602314 | 0.21 | 7.62E-09 | ILMN_1709674 | -1.21 | 8.95E-04 |
| 65  | CSF3R    | cg09088576 | 0.14 | 7.75E-09 | ILMN_2371280 | -1.78 | 7.17E-10 |
| 66  | HOXA4    | cg24169822 | 0.19 | 1.32E-08 | ILMN_3251370 | -1.20 | 5.99E-05 |
| 67  | COX7A1   | cg24335895 | 0.11 | 1.35E-08 | ILMN_1662419 | -1.34 | 3.35E-04 |
| 68  | HCN4     | cg02860342 | 0.17 | 1.49E-08 | ILMN_1790810 | -1.51 | 2.96E-11 |
| 69  | GFOD1    | cg00194146 | 0.25 | 1.92E-08 | ILMN_1778240 | -1.36 | 5.79E-04 |
| 70  | CH25H    | cg23410627 | 0.21 | 2.57E-08 | ILMN_1741021 | -1.64 | 4.59E-05 |
| 71  | HEXIM1   | cg04700814 | 0.13 | 3.45E-08 | ILMN_1685115 | -1.45 | 4.04E-11 |
| 72  | IGFALS   | cg01747665 | 0.13 | 4.03E-08 | ILMN_2188966 | -7.58 | 1.93E-27 |
| 73  | LRAT     | cg23587449 | 0.19 | 4.35E-08 | ILMN_1673491 | -1.29 | 3.14E-14 |
| 74  | KCNJ10   | cg05101920 | 0.16 | 4.55E-08 | ILMN_1808272 | -1.23 | 8.17E-07 |
| 75  | LGALS3BP | cg11105610 | 0.12 | 4.82E-08 | ILMN_1659688 | -1.27 | 3.82E-02 |
| 76  | CBS      | cg22633722 | 0.21 | 6.88E-08 | ILMN_1804735 | -2.05 | 4.36E-09 |
| 77  | EFEMP1   | cg20786074 | 0.15 | 8.21E-08 | ILMN_1735877 | -1.40 | 2.92E-02 |
| 78  | RASGRP2  | cg14170423 | 0.14 | 1.05E-07 | ILMN_2375319 | -1.37 | 2.01E-05 |
| 79  | LAG3     | cg26956535 | 0.10 | 1.10E-07 | ILMN_1813338 | -1.35 | 1.50E-05 |
| 80  | CXCL6    | cg22670329 | 0.14 | 1.14E-07 | ILMN_2161577 | -1.30 | 8.97E-03 |
| 81  | ITGA9    | cg25870420 | 0.21 | 1.31E-07 | ILMN_1813117 | -1.35 | 3.01E-13 |
| 82  | SNAI1    | cg05403071 | 0.20 | 1.42E-07 | ILMN_1758086 | -1.36 | 4.93E-09 |
| 83  | BMP6     | cg03447931 | 0.23 | 1.49E-07 | ILMN_1747650 | -1.24 | 1.62E-06 |
| 84  | ID4      | cg00468146 | 0.20 | 1.89E-07 | ILMN_1721758 | -1.29 | 3.56E-05 |
| 85  | RRAD     | cg19428417 | 0.13 | 2.23E-07 | ILMN_2186137 | -1.25 | 1.86E-05 |
| 86  | APOA5    | cg02157083 | 0.14 | 2.65E-07 | ILMN_1754055 | -3.80 | 1.42E-13 |
| 87  | SFRP5    | cg06692050 | 0.14 | 3.07E-07 | ILMN_1790026 | -1.47 | 9.17E-14 |
| 88  | BRSK2    | cg14021073 | 0.15 | 3.08E-07 | ILMN_1708496 | -1.23 | 8.08E-03 |
| 89  | AEBP1    | cg02126753 | 0.15 | 4.32E-07 | ILMN_1736178 | -1.71 | 9.91E-06 |
| 90  | PLAT     | cg12091331 | 0.15 | 4.33E-07 | ILMN_1738742 | -1.25 | 6.94E-03 |
| 91  | VSX1     | cg06151165 | 0.18 | 6.38E-07 | ILMN_1755734 | -1.21 | 2.89E-06 |
| 92  | ALPL     | cg20645065 | 0.21 | 6.46E-07 | ILMN_1701603 | -2.03 | 2.02E-09 |
| 93  | FYN      | cg17100322 | 0.23 | 6.52E-07 | ILMN_2249920 | -1.31 | 1.45E-06 |
| 94  | BTBD6    | cg09450238 | 0.12 | 6.71E-07 | ILMN_1744725 | -1.38 | 9.67E-06 |
| 95  | ENG      | cg24910675 | 0.13 | 8.42E-07 | ILMN_1760778 | -1.53 | 3.14E-07 |
| 96  | HAND2    | cg01580681 | 0.19 | 8.67E-07 | ILMN_2064902 | -1.36 | 2.04E-14 |
| 97  | EOMES    | cg12858460 | 0.18 | 1.00E-06 | ILMN_1760509 | -1.36 | 8.68E-05 |
| 98  | RAC2     | cg18265887 | 0.16 | 1.17E-06 | ILMN_1709795 | -1.36 | 1.22E-02 |
| 99  | RASSF2   | cg19614321 | 0.15 | 1.27E-06 | ILMN_1812139 | -1.31 | 5.98E-08 |
| 100 | TGFBR3   | cg00563926 | 0.13 | 1.46E-06 | ILMN_1784287 | -1.53 | 6.68E-06 |
| 101 | SYT9     | cg01806928 | 0.15 | 1.86E-06 | ILMN_1728496 | -1.23 | 7.01E-07 |
| 102 | BASP1    | cg23496260 | 0.14 | 2.27E-06 | ILMN_1651826 | -2.15 | 1.63E-10 |
| 103 | ABR      | cg25374854 | 0.15 | 2.48E-06 | ILMN_1657045 | -1.22 | 1.04E-05 |
| 104 | SGCB     | cg23653712 | 0.16 | 2.80E-06 | ILMN_2194467 | -1.28 | 1.12E-05 |
| 105 | BMPER    | cg17561435 | 0.17 | 3.40E-06 | ILMN_3307916 | -1.43 | 3.27E-14 |
| 106 | FEZ1     | cg08221207 | 0.13 | 3.79E-06 | ILMN_1779071 | -1.53 | 1.03E-09 |
| 107 | RECK     | cg12717594 | 0.19 | 4.23E-06 | ILMN_2067269 | -1.21 | 4.66E-03 |
| 108 | TMEM25   | cg20001829 | 0.15 | 4.96E-06 | ILMN_1651745 | -1.40 | 2.23E-08 |
| 109 | ZBTB16   | cg25101936 | 0.13 | 5.05E-06 | ILMN_2305407 | -1.74 | 7.60E-09 |
| 110 | EGR2     | cg19355190 | 0.17 | 6.82E-06 | ILMN_1743199 | -2.28 | 1.50E-10 |
| 111 | TSLP     | cg15089387 | 0.15 | 7.11E-06 | ILMN_1662884 | -1.36 | 1.11E-06 |
| 112 | TNK2     | cg01962086 | 0.16 | 7.26E-06 | ILMN_1669703 | -1.33 | 7.52E-07 |
| 113 | CTBP2    | cg14540150 | 0.15 | 9.99E-06 | ILMN_1781031 | -1.35 | 5.60E-09 |
| 114 | WASF3    | cg07744166 | 0.12 | 1.08E-05 | ILMN_1810797 | -1.25 | 1.23E-02 |
| 115 | PRKAR2B  | cg13705707 | 0.12 | 1.13E-05 | ILMN_1684850 | -1.23 | 4.58E-08 |

|     |          |            |       |          |              |       |          |
|-----|----------|------------|-------|----------|--------------|-------|----------|
| 116 | METR     | cg11027330 | 0.13  | 1.28E-05 | ILMN_1712583 | -1.34 | 5.39E-04 |
| 117 | MFAP4    | cg13030582 | 0.10  | 1.50E-05 | ILMN_1766914 | -4.51 | 3.78E-19 |
| 118 | EFNB3    | cg01013324 | 0.14  | 1.56E-05 | ILMN_1695606 | -1.30 | 3.31E-13 |
| 119 | TRPV4    | cg19615059 | 0.18  | 1.61E-05 | ILMN_2362346 | -1.28 | 5.26E-10 |
| 120 | AKAP12   | cg01555431 | 0.17  | 1.83E-05 | ILMN_1684836 | -1.27 | 6.20E-04 |
| 121 | TMEM121  | cg23886551 | 0.14  | 2.03E-05 | ILMN_1723145 | -1.39 | 7.93E-12 |
| 122 | HLF      | cg04219321 | 0.18  | 2.08E-05 | ILMN_1722829 | -1.81 | 6.34E-09 |
| 123 | TDO2     | cg08121954 | 0.11  | 2.76E-05 | ILMN_1716859 | -2.78 | 2.65E-09 |
| 124 | OAT      | cg03853151 | 0.20  | 2.78E-05 | ILMN_1654441 | -2.50 | 3.54E-09 |
| 125 | THRSP    | cg18338296 | 0.14  | 2.84E-05 | ILMN_1794844 | -4.68 | 7.50E-10 |
| 126 | TFPI2    | cg23141855 | 0.11  | 3.26E-05 | ILMN_2068104 | -1.78 | 2.18E-15 |
| 127 | FOXF1    | cg25971347 | 0.15  | 4.02E-05 | ILMN_1680973 | -1.23 | 4.59E-07 |
| 128 | LEPREL1  | cg20270599 | 0.11  | 4.05E-05 | ILMN_1657373 | -2.15 | 4.84E-20 |
| 129 | NOL4     | cg06722216 | 0.11  | 4.06E-05 | ILMN_2087629 | -1.29 | 1.25E-04 |
| 130 | KCNS3    | cg20673481 | 0.15  | 5.32E-05 | ILMN_2175112 | -1.24 | 7.59E-03 |
| 131 | KRT7     | cg07007400 | 0.11  | 6.62E-05 | ILMN_2163723 | -1.25 | 1.69E-03 |
| 132 | OXT      | cg26955850 | 0.13  | 8.08E-05 | ILMN_1735124 | -2.13 | 1.03E-13 |
| 133 | GRAMD3   | cg08704509 | 0.14  | 9.36E-05 | ILMN_2065690 | -1.28 | 1.18E-06 |
| 134 | SEMA6A   | cg12928668 | 0.12  | 1.00E-04 | ILMN_1713529 | -1.45 | 1.99E-06 |
| 135 | TMPRSS2  | cg24901042 | 0.14  | 1.03E-04 | ILMN_1791123 | -1.99 | 7.74E-10 |
| 136 | CYBRD1   | cg06885524 | 0.13  | 1.20E-04 | ILMN_1712305 | -1.46 | 9.52E-05 |
| 137 | CIQTNF1  | cg24844534 | 0.13  | 1.52E-04 | ILMN_2380237 | -2.10 | 2.56E-13 |
| 138 | FLRT2    | cg17410236 | 0.14  | 1.79E-04 | ILMN_1769615 | -1.23 | 1.82E-07 |
| 139 | RASSF5   | cg02589695 | 0.15  | 2.20E-04 | ILMN_2362902 | -1.22 | 1.52E-05 |
| 140 | PELI2    | cg21099488 | 0.10  | 3.56E-04 | ILMN_1780132 | -1.27 | 4.01E-05 |
| 141 | CCND1    | cg09637363 | 0.10  | 3.79E-04 | ILMN_1688480 | -1.30 | 6.40E-03 |
| 142 | PRSS8    | cg13439730 | 0.10  | 4.18E-04 | ILMN_1796461 | -1.71 | 3.18E-09 |
| 143 | EGR3     | cg25811575 | 0.12  | 4.63E-04 | ILMN_1722781 | -1.32 | 6.93E-07 |
| 144 | PROK2    | cg08555612 | 0.11  | 7.63E-04 | ILMN_1775257 | -1.48 | 3.85E-05 |
| 145 | B3GAT1   | cg11038843 | 0.11  | 7.93E-04 | ILMN_1794072 | -1.71 | 1.45E-13 |
| 146 | COL6A2   | cg21513553 | 0.12  | 1.59E-03 | ILMN_1765017 | -1.25 | 3.71E-08 |
| 147 | KLF4     | cg07309102 | 0.13  | 1.61E-03 | ILMN_1779857 | -1.40 | 3.56E-06 |
| 148 | SDPR     | cg06352750 | 0.12  | 1.89E-03 | ILMN_1715991 | -1.56 | 1.08E-08 |
| 149 | RGS2     | cg20315136 | 0.11  | 2.19E-03 | ILMN_2197365 | -2.34 | 8.19E-09 |
| 150 | TMEM51   | cg05385377 | 0.11  | 2.27E-03 | ILMN_1674985 | -1.22 | 2.49E-02 |
| 151 | DUSP2    | cg05732530 | 0.10  | 2.29E-03 | ILMN_1712959 | -1.31 | 2.66E-06 |
| 152 | KLF2     | cg26842024 | 0.13  | 2.59E-03 | ILMN_1735930 | -1.53 | 3.20E-07 |
| 153 | EPHA2    | cg15146752 | 0.11  | 4.06E-03 | ILMN_1699354 | -1.79 | 1.34E-14 |
| 154 | TNFRSF1B | cg26189983 | 0.10  | 6.82E-03 | ILMN_1764788 | -1.40 | 1.09E-04 |
| 155 | NME4     | cg18676162 | 0.11  | 7.22E-03 | ILMN_1800634 | -1.21 | 1.89E-02 |
| 156 | SOCS3    | cg27637521 | 0.13  | 1.12E-02 | ILMN_1781001 | -2.13 | 3.34E-09 |
| 157 | TMEM106A | cg04482110 | 0.12  | 1.44E-02 | ILMN_3249244 | -1.42 | 1.20E-07 |
| 158 | LHX2     | cg07109287 | 0.10  | 2.13E-02 | ILMN_1807016 | -2.25 | 2.85E-15 |
| 159 | MNDA     | cg25119415 | -0.24 | 1.50E-30 | ILMN_1738992 | -1.40 | 2.95E-07 |
| 160 | LILRA3   | cg00705255 | -0.15 | 1.88E-30 | ILMN_1661631 | -1.24 | 1.20E-07 |
| 161 | WFDC1    | cg23865698 | -0.27 | 1.91E-26 | ILMN_1660808 | -1.32 | 3.89E-08 |
| 162 | S100A12  | cg02813121 | -0.36 | 7.10E-26 | ILMN_1748915 | -1.39 | 5.82E-08 |
| 163 | CEACAM6  | cg26813458 | -0.33 | 4.38E-25 | ILMN_1712522 | -1.20 | 4.16E-02 |
| 164 | CDA      | cg13164309 | -0.21 | 7.79E-24 | ILMN_1714592 | -1.82 | 3.33E-12 |
| 165 | HBG1     | cg01598642 | -0.29 | 9.91E-23 | ILMN_1796678 | -1.30 | 2.03E-05 |
| 166 | FCN1     | cg06244417 | -0.29 | 2.34E-22 | ILMN_1668063 | -1.48 | 8.75E-07 |
| 167 | KCNQ1    | cg12949760 | -0.28 | 3.77E-22 | ILMN_1656079 | -1.23 | 1.62E-07 |
| 168 | FAM107B  | cg02876062 | -0.28 | 1.79E-21 | ILMN_1758672 | -1.29 | 8.69E-06 |
| 169 | C1QB     | cg22477971 | -0.25 | 6.96E-21 | ILMN_1796409 | -1.63 | 5.41E-05 |
| 170 | S100A8   | cg20070090 | -0.21 | 1.09E-20 | ILMN_1729801 | -2.91 | 3.27E-11 |
| 171 | HAVCR2   | cg17484237 | -0.18 | 1.77E-20 | ILMN_1693826 | -1.21 | 1.41E-02 |
| 172 | OLFM1    | cg08268099 | -0.24 | 6.35E-20 | ILMN_1742025 | -1.48 | 4.51E-08 |
| 173 | TREML1   | cg01564343 | -0.28 | 1.07E-19 | ILMN_1690783 | -1.47 | 1.98E-11 |
| 174 | MARCO    | cg02431964 | -0.28 | 2.44E-19 | ILMN_1731503 | -4.54 | 3.10E-25 |
| 175 | LILRB5   | cg20649991 | -0.27 | 8.01E-19 | ILMN_2339294 | -1.62 | 8.62E-14 |
| 176 | C1QC     | cg11393848 | -0.11 | 8.71E-19 | ILMN_1785902 | -1.47 | 2.52E-04 |

|     |          |            |       |          |              |        |          |
|-----|----------|------------|-------|----------|--------------|--------|----------|
| 177 | CTSG     | cg24355048 | -0.17 | 9.49E-19 | ILMN_1680424 | -1.26  | 5.04E-03 |
| 178 | LIFR     | cg01796228 | -0.21 | 1.67E-18 | ILMN_1709094 | -1.48  | 1.92E-16 |
| 179 | TCN1     | cg20018806 | -0.20 | 1.78E-18 | ILMN_1768469 | -1.26  | 2.39E-02 |
| 180 | DEFA3    | cg22218909 | -0.25 | 1.40E-17 | ILMN_2165289 | -1.78  | 1.94E-08 |
| 181 | ABLIM3   | cg05026186 | -0.12 | 1.75E-17 | ILMN_1656940 | -1.50  | 3.00E-07 |
| 182 | PRG2     | cg15357945 | -0.21 | 2.99E-17 | ILMN_1729314 | -1.32  | 6.38E-06 |
| 183 | TFF2     | cg11158374 | -0.27 | 5.35E-17 | ILMN_1663919 | -1.31  | 1.68E-02 |
| 184 | MX2      | cg04828792 | -0.27 | 5.47E-17 | ILMN_2231928 | -1.29  | 1.80E-04 |
| 185 | TMEM86B  | cg01076838 | -0.25 | 5.66E-17 | ILMN_2049417 | -1.62  | 6.96E-11 |
| 186 | FAM83F   | cg03954858 | -0.23 | 1.07E-16 | ILMN_1683231 | -1.33  | 1.84E-12 |
| 187 | TRPM8    | cg15746445 | -0.18 | 1.81E-16 | ILMN_1661637 | -2.60  | 4.70E-13 |
| 188 | LILRB3   | cg22456522 | -0.20 | 2.57E-16 | ILMN_1784884 | -1.46  | 1.35E-05 |
| 189 | CASP1    | cg13802966 | -0.13 | 2.68E-16 | ILMN_1727762 | -1.31  | 3.97E-08 |
| 190 | CLEC4E   | cg22984277 | -0.11 | 3.73E-16 | ILMN_1771664 | -1.23  | 2.88E-04 |
| 191 | FCN2     | cg26164184 | -0.21 | 4.88E-16 | ILMN_1714057 | -2.48  | 1.87E-22 |
| 192 | GRM8     | cg02946850 | -0.26 | 4.88E-16 | ILMN_1729212 | -1.46  | 2.09E-07 |
| 193 | PVALB    | cg02978737 | -0.23 | 5.25E-16 | ILMN_2069224 | -1.40  | 2.24E-17 |
| 194 | GZMH     | cg22228134 | -0.21 | 7.47E-16 | ILMN_1731233 | -1.34  | 4.68E-05 |
| 195 | ACMSD    | cg02812142 | -0.16 | 1.36E-15 | ILMN_1727091 | -1.65  | 3.96E-06 |
| 196 | AQP7     | cg13246269 | -0.14 | 5.89E-15 | ILMN_1738494 | -1.36  | 1.03E-07 |
| 197 | OVGP1    | cg09558502 | -0.15 | 6.23E-15 | ILMN_1734542 | -1.30  | 5.24E-04 |
| 198 | GPR1     | cg19132372 | -0.23 | 1.87E-14 | ILMN_2107004 | -1.40  | 2.96E-08 |
| 199 | CBFA2T3  | cg13745346 | -0.21 | 4.23E-14 | ILMN_1657627 | -1.26  | 1.37E-09 |
| 200 | GZMA     | cg06118312 | -0.16 | 4.65E-14 | ILMN_1779324 | -1.30  | 1.01E-02 |
| 201 | SIGLEC11 | cg24311282 | -0.24 | 4.85E-14 | ILMN_1674593 | -1.50  | 4.70E-13 |
| 202 | SGCA     | cg04582295 | -0.21 | 5.89E-14 | ILMN_1741007 | -1.39  | 2.47E-09 |
| 203 | GPR109B  | cg05384917 | -0.25 | 6.54E-14 | ILMN_1677693 | -1.20  | 6.00E-03 |
| 204 | IL10RA   | cg26661481 | -0.25 | 8.46E-14 | ILMN_1652825 | -1.44  | 1.92E-05 |
| 205 | SFTPD    | cg03600318 | -0.15 | 1.01E-13 | ILMN_1768575 | -1.30  | 4.39E-13 |
| 206 | TMEM71   | cg27159719 | -0.15 | 1.16E-13 | ILMN_1674402 | -1.47  | 1.00E-06 |
| 207 | CCL4     | cg25659818 | -0.20 | 1.25E-13 | ILMN_1674563 | -1.55  | 5.26E-11 |
| 208 | DPYS     | cg20774846 | -0.11 | 1.45E-13 | ILMN_1749324 | -1.68  | 4.84E-05 |
| 209 | H19      | cg26808784 | -0.27 | 2.49E-13 | ILMN_2148527 | -2.75  | 5.24E-06 |
| 210 | GJB2     | cg11054936 | -0.12 | 2.51E-13 | ILMN_1769388 | -1.64  | 2.20E-06 |
| 211 | HK3      | cg14709481 | -0.17 | 3.30E-13 | ILMN_1670302 | -1.49  | 9.68E-13 |
| 212 | MLN      | cg20226764 | -0.17 | 4.22E-13 | ILMN_1685858 | -1.27  | 3.48E-13 |
| 213 | CLEC4G   | cg16626670 | -0.21 | 1.05E-12 | ILMN_2193817 | -7.64  | 7.90E-32 |
| 214 | AZGP1    | cg12019109 | -0.16 | 2.06E-12 | ILMN_1797154 | -2.55  | 1.40E-14 |
| 215 | SCGB3A1  | cg14472601 | -0.23 | 2.08E-12 | ILMN_1679666 | -1.47  | 1.60E-04 |
| 216 | CIQA     | cg00108454 | -0.10 | 6.48E-12 | ILMN_1737918 | -1.34  | 9.80E-04 |
| 217 | AFAR3    | cg11376198 | -0.20 | 1.30E-11 | ILMN_1702696 | -1.42  | 1.32E-06 |
| 218 | DBH      | cg25020204 | -0.18 | 1.38E-11 | ILMN_1746220 | -4.74  | 2.05E-23 |
| 219 | CCDC48   | cg24287460 | -0.17 | 1.43E-11 | ILMN_1751099 | -1.21  | 7.10E-07 |
| 220 | OSBPL5   | cg25852715 | -0.17 | 1.72E-11 | ILMN_1802151 | -1.24  | 1.17E-04 |
| 221 | CYP1A2   | cg09207718 | -0.19 | 2.38E-11 | ILMN_1683607 | -13.70 | 7.93E-22 |
| 222 | CRISPLD2 | cg07207789 | -0.17 | 3.69E-11 | ILMN_1790689 | -1.70  | 1.08E-06 |
| 223 | IL10     | cg17067005 | -0.20 | 4.05E-11 | ILMN_2073307 | -1.46  | 1.28E-07 |
| 224 | CNGA1    | cg19000186 | -0.17 | 4.57E-11 | ILMN_1786353 | -1.91  | 3.52E-10 |
| 225 | DIRAS3   | cg21808053 | -0.21 | 5.09E-11 | ILMN_2174215 | -1.29  | 3.49E-09 |
| 226 | NDN      | cg01989224 | -0.16 | 6.60E-11 | ILMN_1692058 | -1.30  | 5.05E-03 |
| 227 | GPLD1    | cg14023451 | -0.16 | 6.66E-11 | ILMN_1765419 | -1.31  | 1.53E-02 |
| 228 | SLC18A1  | cg13857100 | -0.13 | 1.02E-10 | ILMN_2172890 | -1.52  | 2.40E-11 |
| 229 | PTGDS    | cg00563932 | -0.17 | 1.65E-10 | ILMN_1664464 | -2.04  | 5.35E-08 |
| 230 | AGXT     | cg16967583 | -0.10 | 1.85E-10 | ILMN_1709796 | -2.35  | 1.67E-09 |
| 231 | IGLL1    | cg10494770 | -0.12 | 1.87E-10 | ILMN_2393765 | -4.05  | 2.84E-10 |
| 232 | GNMT     | cg24751129 | -0.20 | 2.42E-10 | ILMN_1736238 | -4.02  | 2.88E-13 |
| 233 | TIMD4    | cg18994063 | -0.13 | 2.96E-10 | ILMN_1750678 | -2.24  | 3.23E-11 |
| 234 | GABRP    | cg23181170 | -0.13 | 4.88E-10 | ILMN_1689146 | -1.29  | 6.72E-08 |
| 235 | IGF2     | cg02807948 | -0.12 | 5.82E-10 | ILMN_1699867 | -2.46  | 3.37E-07 |
| 236 | PROM1    | cg20576510 | -0.18 | 6.50E-10 | ILMN_1786720 | -1.52  | 1.68E-08 |
| 237 | DES      | cg26259363 | -0.14 | 6.63E-10 | ILMN_1698995 | -1.21  | 2.30E-05 |

|     |           |            |       |          |              |       |          |
|-----|-----------|------------|-------|----------|--------------|-------|----------|
| 238 | GDF2      | cg21115977 | -0.18 | 8.85E-10 | ILMN_1760363 | -1.48 | 2.56E-15 |
| 239 | LILRB2    | cg05248470 | -0.11 | 1.13E-09 | ILMN_1734234 | -1.31 | 8.56E-10 |
| 240 | ALPP      | cg13605579 | -0.15 | 1.19E-09 | ILMN_1693789 | -1.40 | 3.84E-06 |
| 241 | RAMP3     | cg02417264 | -0.12 | 1.29E-09 | ILMN_2065745 | -1.78 | 3.08E-14 |
| 242 | KCNJ15    | cg03993463 | -0.13 | 1.38E-09 | ILMN_1675756 | -1.21 | 1.80E-05 |
| 243 | APOC3     | cg04048249 | -0.12 | 1.58E-09 | ILMN_1722070 | -1.71 | 6.01E-06 |
| 244 | APOB      | cg24309555 | -0.11 | 1.98E-09 | ILMN_1664024 | -1.39 | 2.26E-05 |
| 245 | PMP22     | cg03242666 | -0.13 | 2.43E-09 | ILMN_1659312 | -1.22 | 1.24E-04 |
| 246 | PLCG2     | cg21522797 | -0.13 | 2.62E-09 | ILMN_1815719 | -1.34 | 1.27E-03 |
| 247 | SDC4      | cg10876928 | -0.14 | 3.36E-09 | ILMN_1663042 | -1.72 | 1.51E-11 |
| 248 | BDH2      | cg02214188 | -0.11 | 3.45E-09 | ILMN_1673360 | -1.59 | 2.23E-15 |
| 249 | ARHGDIB   | cg10925082 | -0.14 | 5.50E-09 | ILMN_1678143 | -1.36 | 4.94E-04 |
| 250 | FGL1      | cg01871995 | -0.12 | 5.68E-09 | ILMN_2366192 | -1.61 | 3.21E-03 |
| 251 | CTRC      | cg23064554 | -0.11 | 5.96E-09 | ILMN_1748730 | -1.21 | 2.27E-05 |
| 252 | AHSG      | cg07361385 | -0.17 | 6.81E-09 | ILMN_1730625 | -1.40 | 5.89E-04 |
| 253 | CYP8B1    | cg14404298 | -0.11 | 7.00E-09 | ILMN_1669802 | -2.71 | 2.01E-06 |
| 254 | PPBP      | cg20357806 | -0.14 | 7.76E-09 | ILMN_1767281 | -1.21 | 2.43E-07 |
| 255 | LAMC3     | cg26491484 | -0.17 | 8.04E-09 | ILMN_1688642 | -1.52 | 1.83E-07 |
| 256 | CD48      | cg13311440 | -0.16 | 8.26E-09 | ILMN_2061043 | -1.21 | 3.78E-02 |
| 257 | RARRES2   | cg02902770 | -0.12 | 1.14E-08 | ILMN_1810844 | -1.33 | 2.17E-03 |
| 258 | MS4A6A    | cg04353769 | -0.13 | 1.21E-08 | ILMN_1797731 | -2.29 | 1.24E-13 |
| 259 | CYP3A43   | cg13364756 | -0.15 | 1.78E-08 | ILMN_1673591 | -3.11 | 8.47E-18 |
| 260 | VTN       | cg04706338 | -0.13 | 1.97E-08 | ILMN_1691127 | -1.38 | 6.35E-06 |
| 261 | GZMK      | cg04705866 | -0.11 | 2.13E-08 | ILMN_1710734 | -1.57 | 6.93E-07 |
| 262 | CLDN10    | cg08418978 | -0.16 | 2.64E-08 | ILMN_1737096 | -1.43 | 1.45E-12 |
| 263 | GPT       | cg15983520 | -0.12 | 2.95E-08 | ILMN_1795257 | -2.36 | 1.61E-13 |
| 264 | GMFG      | cg02436686 | -0.13 | 2.99E-08 | ILMN_1711617 | -1.51 | 1.07E-07 |
| 265 | ZDHC11    | cg18429742 | -0.15 | 3.85E-08 | ILMN_1694514 | -1.57 | 3.92E-06 |
| 266 | ATAD3C    | cg27383362 | -0.13 | 3.98E-08 | ILMN_2231569 | -1.21 | 2.11E-07 |
| 267 | PDK4      | cg22171829 | -0.11 | 4.15E-08 | ILMN_1684982 | -2.25 | 3.86E-10 |
| 268 | SERPINA10 | cg05788638 | -0.16 | 4.58E-08 | ILMN_1793628 | -1.85 | 7.87E-09 |
| 269 | GUCY1A3   | cg02210887 | -0.11 | 4.87E-08 | ILMN_2131177 | -1.40 | 2.37E-11 |
| 270 | SARDH     | cg21122774 | -0.14 | 5.70E-08 | ILMN_1704973 | -1.90 | 7.62E-16 |
| 271 | EF3       | cg07197059 | -0.18 | 6.14E-08 | ILMN_1765248 | -1.23 | 7.75E-08 |
| 272 | SLC27A5   | cg23036025 | -0.10 | 8.69E-08 | ILMN_1725366 | -2.87 | 8.09E-10 |
| 273 | NR4A1     | cg03533058 | -0.13 | 8.99E-08 | ILMN_1661178 | -1.65 | 7.53E-15 |
| 274 | ITIH1     | cg06134964 | -0.15 | 9.22E-08 | ILMN_1755251 | -1.78 | 1.00E-08 |
| 275 | HMGCS2    | cg10212621 | -0.11 | 9.27E-08 | ILMN_1815203 | -1.71 | 2.36E-07 |
| 276 | TNXB      | cg13823701 | -0.11 | 1.07E-07 | ILMN_1684614 | -1.62 | 2.73E-16 |
| 277 | NTF3      | cg02554564 | -0.11 | 1.11E-07 | ILMN_1809364 | -2.00 | 2.17E-19 |
| 278 | KCNAB1    | cg15423862 | -0.16 | 1.13E-07 | ILMN_1744968 | -1.26 | 3.59E-07 |
| 279 | NKG7      | cg10126923 | -0.17 | 1.30E-07 | ILMN_1682993 | -1.38 | 9.15E-06 |
| 280 | CA5A      | cg12343082 | -0.14 | 1.65E-07 | ILMN_1731292 | -2.03 | 1.45E-09 |
| 281 | SLC2A2    | cg17142134 | -0.15 | 1.93E-07 | ILMN_1755720 | -1.90 | 9.03E-06 |
| 282 | F2        | cg20199333 | -0.14 | 2.33E-07 | ILMN_3249291 | -1.65 | 1.82E-08 |
| 283 | KCNK17    | cg02611419 | -0.17 | 2.78E-07 | ILMN_1717702 | -1.43 | 1.65E-11 |
| 284 | LY86      | cg02212836 | -0.17 | 3.02E-07 | ILMN_1807825 | -1.27 | 8.17E-04 |
| 285 | MBL2      | cg27418851 | -0.12 | 3.40E-07 | ILMN_1762464 | -3.52 | 4.14E-12 |
| 286 | SLCO4A1   | cg09210315 | -0.10 | 3.49E-07 | ILMN_1727200 | -1.29 | 3.18E-05 |
| 287 | RBP5      | cg24441911 | -0.16 | 3.55E-07 | ILMN_2103024 | -1.85 | 1.36E-07 |
| 288 | F12       | cg12332316 | -0.14 | 3.56E-07 | ILMN_1671766 | -1.82 | 1.95E-06 |
| 289 | CFB       | cg17741572 | -0.14 | 3.62E-07 | ILMN_1774287 | -1.35 | 4.94E-04 |
| 290 | PLA2G12B  | cg21820890 | -0.16 | 3.72E-07 | ILMN_1808487 | -1.20 | 8.06E-03 |
| 291 | AQP12A    | cg06356454 | -0.14 | 4.47E-07 | ILMN_1757036 | -1.52 | 1.47E-12 |
| 292 | A1BG      | cg22568540 | -0.16 | 4.83E-07 | ILMN_2055271 | -1.21 | 1.14E-03 |
| 293 | ORM2      | cg16408565 | -0.18 | 5.71E-07 | ILMN_1731785 | -1.63 | 2.76E-06 |
| 294 | CD86      | cg04387658 | -0.12 | 6.60E-07 | ILMN_1714602 | -1.26 | 1.46E-03 |
| 295 | SULT2A1   | cg19139729 | -0.10 | 6.71E-07 | ILMN_1692983 | -2.15 | 1.12E-06 |
| 296 | FCGR3A    | cg22202141 | -0.12 | 9.77E-07 | ILMN_1703679 | -1.40 | 2.90E-10 |
| 297 | CD79B     | cg25729716 | -0.10 | 9.95E-07 | ILMN_2366212 | -1.28 | 2.63E-05 |
| 298 | COLEC10   | cg05755779 | -0.16 | 1.06E-06 | ILMN_1662962 | -1.85 | 2.41E-17 |

|     |           |            |       |          |              |       |          |
|-----|-----------|------------|-------|----------|--------------|-------|----------|
| 299 | HSD17B2   | cg20373326 | -0.10 | 1.29E-06 | ILMN_1808713 | -2.78 | 2.34E-12 |
| 300 | FCGR3B    | cg04567009 | -0.12 | 1.59E-06 | ILMN_1728639 | -1.32 | 5.75E-05 |
| 301 | FGFR1     | cg08722122 | -0.15 | 1.65E-06 | ILMN_1729369 | -1.39 | 1.04E-11 |
| 302 | GIMAP7    | cg01827098 | -0.15 | 1.73E-06 | ILMN_1776678 | -1.38 | 1.17E-05 |
| 303 | ACY1      | cg16159313 | -0.17 | 2.47E-06 | ILMN_1683883 | -1.25 | 1.14E-02 |
| 304 | FMO3      | cg25778166 | -0.12 | 2.74E-06 | ILMN_2344283 | -2.10 | 1.07E-05 |
| 305 | KIAA0367  | cg11880010 | -0.12 | 2.74E-06 | ILMN_1810628 | -1.23 | 1.55E-04 |
| 306 | F7        | cg24269657 | -0.13 | 3.13E-06 | ILMN_1740559 | -1.65 | 2.00E-09 |
| 307 | S100A9    | cg07039113 | -0.16 | 3.68E-06 | ILMN_1750974 | -1.60 | 1.46E-03 |
| 308 | ABCG5     | cg08453096 | -0.13 | 4.06E-06 | ILMN_1716592 | -1.29 | 1.13E-03 |
| 309 | EPB41L1   | cg20993403 | -0.13 | 4.12E-06 | ILMN_1716507 | -1.25 | 2.49E-05 |
| 310 | ACP5      | cg07967308 | -0.10 | 4.52E-06 | ILMN_2078599 | -1.36 | 4.37E-03 |
| 311 | LIPC      | cg01733599 | -0.11 | 5.03E-06 | ILMN_1812700 | -2.21 | 4.67E-11 |
| 312 | LRP3      | cg08700306 | -0.11 | 5.64E-06 | ILMN_2127605 | -1.45 | 2.55E-07 |
| 313 | NPDC1     | cg26581729 | -0.15 | 6.80E-06 | ILMN_2199313 | -1.24 | 8.66E-09 |
| 314 | PROC      | cg26718585 | -0.12 | 6.90E-06 | ILMN_1687721 | -1.69 | 2.03E-10 |
| 315 | CCL16     | cg05766474 | -0.15 | 8.31E-06 | ILMN_2045324 | -1.29 | 1.94E-02 |
| 316 | FXVD2     | cg25894551 | -0.14 | 8.86E-06 | ILMN_1781045 | -1.51 | 3.40E-09 |
| 317 | PROZ      | cg25734864 | -0.13 | 9.45E-06 | ILMN_1664565 | -2.92 | 1.23E-13 |
| 318 | SERPIND1  | cg02523400 | -0.12 | 1.04E-05 | ILMN_1707975 | -1.21 | 1.10E-02 |
| 319 | NR0B2     | cg10055471 | -0.13 | 1.08E-05 | ILMN_2220978 | -2.02 | 5.76E-10 |
| 320 | ANPEP     | cg13042288 | -0.11 | 1.32E-05 | ILMN_1763837 | -1.68 | 1.99E-08 |
| 321 | EDN2      | cg27238470 | -0.11 | 1.35E-05 | ILMN_1680814 | -1.22 | 3.01E-05 |
| 322 | PCSK6     | cg20249919 | -0.12 | 1.52E-05 | ILMN_1768577 | -1.45 | 7.19E-05 |
| 323 | LDB2      | cg03368758 | -0.11 | 1.93E-05 | ILMN_1800697 | -1.43 | 1.09E-07 |
| 324 | CYP2E1    | cg00436603 | -0.10 | 2.51E-05 | ILMN_1665437 | -5.04 | 5.97E-11 |
| 325 | LCP2      | cg17127769 | -0.11 | 2.59E-05 | ILMN_1658962 | -1.33 | 3.05E-08 |
| 326 | CSF1R     | cg04569804 | -0.10 | 2.81E-05 | ILMN_1686623 | -1.67 | 5.41E-07 |
| 327 | ITIH3     | cg26099316 | -0.10 | 3.41E-05 | ILMN_1757461 | -1.22 | 3.98E-02 |
| 328 | PCOLCE    | cg26777475 | -0.10 | 3.96E-05 | ILMN_1707070 | -1.81 | 1.12E-05 |
| 329 | UPB1      | cg10613381 | -0.11 | 4.07E-05 | ILMN_1678690 | -1.65 | 1.60E-05 |
| 330 | ISLR      | cg02077702 | -0.11 | 4.22E-05 | ILMN_1747593 | -1.45 | 3.20E-05 |
| 331 | AMBP      | cg06630567 | -0.11 | 5.00E-05 | ILMN_1695446 | -1.47 | 1.43E-05 |
| 332 | NGFR      | cg17129388 | -0.12 | 5.28E-05 | ILMN_1752658 | -1.51 | 2.20E-17 |
| 333 | ITGAD     | cg02164442 | -0.12 | 7.86E-05 | ILMN_1681945 | -1.60 | 1.09E-08 |
| 334 | SERPINA6  | cg10025865 | -0.10 | 8.25E-05 | ILMN_2215418 | -1.36 | 4.56E-03 |
| 335 | TFR2      | cg10681065 | -0.11 | 1.19E-04 | ILMN_1724738 | -2.01 | 9.16E-12 |
| 336 | PER3      | cg25514503 | -0.10 | 1.32E-04 | ILMN_1660986 | -1.29 | 1.07E-05 |
| 337 | EVC2      | cg03278643 | -0.13 | 1.53E-04 | ILMN_1762735 | -2.11 | 1.30E-14 |
| 338 | ANKRD38   | cg00625425 | -0.12 | 1.85E-04 | ILMN_1776936 | -1.52 | 4.68E-04 |
| 339 | SLC39A14  | cg05254747 | -0.10 | 3.06E-04 | ILMN_1764629 | -1.66 | 8.58E-10 |
| 340 | TYROBP    | cg20267005 | -0.12 | 3.24E-04 | ILMN_1778977 | -1.31 | 8.93E-03 |
| 341 | CXCL12    | cg18618334 | -0.14 | 6.60E-04 | ILMN_1791447 | -5.25 | 9.64E-21 |
| 342 | COL8A2    | cg18931815 | -0.12 | 6.87E-04 | ILMN_2102330 | -1.32 | 6.24E-07 |
| 343 | ENOSF1    | cg16112050 | -0.10 | 3.02E-03 | ILMN_1803676 | -1.21 | 9.08E-04 |
| 344 | SF3B14    | cg04809136 | 0.53  | 1.49E-33 | ILMN_1703720 | 1.39  | 5.22E-11 |
| 345 | HIST1H2AE | cg20520725 | 0.35  | 1.27E-23 | ILMN_1756849 | 1.26  | 3.19E-05 |
| 346 | NETO2     | cg02755525 | 0.52  | 1.17E-22 | ILMN_1760849 | 1.46  | 1.89E-10 |
| 347 | GPR160    | cg18741908 | 0.28  | 1.79E-20 | ILMN_1662846 | 1.24  | 3.33E-04 |
| 348 | RASL12    | cg10604168 | 0.33  | 5.55E-20 | ILMN_1806403 | 1.33  | 2.13E-09 |
| 349 | ATPIA1    | cg09580336 | 0.25  | 3.76E-19 | ILMN_1731783 | 1.44  | 3.13E-06 |
| 350 | CELSR3    | cg06621358 | 0.31  | 3.94E-19 | ILMN_1691290 | 1.95  | 1.25E-13 |
| 351 | COL7A1    | cg11846236 | 0.35  | 1.29E-18 | ILMN_1751161 | 1.49  | 6.84E-06 |
| 352 | RAB22A    | cg26029902 | 0.30  | 1.96E-18 | ILMN_1786976 | 1.35  | 1.02E-07 |
| 353 | EFNB2     | cg24929737 | 0.39  | 7.32E-18 | ILMN_1703852 | 1.34  | 1.18E-07 |
| 354 | MSX1      | cg03843978 | 0.19  | 1.18E-17 | ILMN_1777397 | 1.44  | 3.27E-10 |
| 355 | CDKN2B    | cg06421800 | 0.18  | 3.59E-17 | ILMN_2376723 | 1.31  | 3.88E-06 |
| 356 | FOXO2     | cg15868302 | 0.14  | 8.55E-17 | ILMN_1789400 | 1.51  | 3.47E-10 |
| 357 | LGALS3    | cg19099850 | 0.45  | 2.17E-15 | ILMN_1803788 | 1.37  | 1.10E-03 |
| 358 | AKR1B1    | cg13801416 | 0.40  | 3.56E-15 | ILMN_1701731 | 1.57  | 1.02E-03 |
| 359 | MSC       | cg23710218 | 0.25  | 1.50E-14 | ILMN_1741404 | 1.29  | 3.19E-03 |

|     |           |            |      |          |              |      |          |
|-----|-----------|------------|------|----------|--------------|------|----------|
| 360 | HOXA13    | cg06397837 | 0.28 | 3.80E-14 | ILMN_1731349 | 1.72 | 9.82E-08 |
| 361 | CLEC14A   | cg14473145 | 0.21 | 6.82E-14 | ILMN_2142185 | 1.28 | 1.17E-03 |
| 362 | CTHRC1    | cg26952662 | 0.36 | 3.71E-13 | ILMN_1725090 | 1.84 | 6.61E-06 |
| 363 | HIST3H2A  | cg14743462 | 0.28 | 8.69E-13 | ILMN_1779648 | 1.20 | 2.21E-04 |
| 364 | APH1B     | cg17207590 | 0.22 | 4.13E-12 | ILMN_1767816 | 1.36 | 2.12E-05 |
| 365 | RPL39L    | cg07441272 | 0.30 | 7.36E-12 | ILMN_1712413 | 1.30 | 1.50E-02 |
| 366 | CBR3      | cg14564494 | 0.19 | 8.83E-12 | ILMN_1652237 | 1.27 | 3.22E-05 |
| 367 | TMEM119   | cg16708012 | 0.12 | 9.39E-12 | ILMN_1738116 | 1.22 | 9.99E-03 |
| 368 | ACTG1     | cg19517525 | 0.35 | 2.93E-11 | ILMN_2053178 | 1.23 | 6.08E-05 |
| 369 | PDGFRB    | cg12727795 | 0.19 | 3.13E-11 | ILMN_1815057 | 1.31 | 1.80E-02 |
| 370 | RAB5C     | cg22373112 | 0.18 | 3.94E-11 | ILMN_1769665 | 1.30 | 1.14E-05 |
| 371 | NINJ2     | cg00237010 | 0.16 | 4.10E-11 | ILMN_1731745 | 1.36 | 3.48E-03 |
| 372 | TERT      | cg02545192 | 0.27 | 4.26E-11 | ILMN_2373119 | 1.39 | 1.09E-05 |
| 373 | EIF5A2    | cg10541755 | 0.30 | 5.21E-11 | ILMN_1735151 | 1.34 | 1.59E-05 |
| 374 | EMILIN2   | cg09009111 | 0.29 | 6.94E-11 | ILMN_1697268 | 1.25 | 1.92E-02 |
| 375 | PITX1     | cg24495017 | 0.25 | 7.55E-11 | ILMN_1674386 | 1.68 | 2.01E-06 |
| 376 | SPARC     | cg08331313 | 0.20 | 8.34E-11 | ILMN_1796734 | 1.20 | 4.15E-02 |
| 377 | STEAP1    | cg18320336 | 0.16 | 1.97E-10 | ILMN_1733094 | 1.37 | 2.74E-03 |
| 378 | ZNF606    | cg12259537 | 0.19 | 2.05E-10 | ILMN_1681829 | 1.25 | 9.11E-08 |
| 379 | ZNF514    | cg18793806 | 0.17 | 2.82E-10 | ILMN_2215211 | 1.25 | 2.79E-08 |
| 380 | RAB11FIP4 | cg10149836 | 0.21 | 3.85E-10 | ILMN_1681467 | 1.28 | 1.06E-09 |
| 381 | COG2      | cg17031727 | 0.19 | 4.14E-10 | ILMN_1776993 | 1.30 | 1.18E-08 |
| 382 | PFKP      | cg08465862 | 0.24 | 5.06E-10 | ILMN_1805737 | 1.23 | 6.31E-03 |
| 383 | ACSS1     | cg15988792 | 0.23 | 7.10E-10 | ILMN_1752269 | 1.25 | 1.58E-05 |
| 384 | TPM2      | cg17691309 | 0.21 | 9.79E-10 | ILMN_1789196 | 1.43 | 7.37E-04 |
| 385 | UCHL1     | cg08319991 | 0.18 | 1.12E-09 | ILMN_1757387 | 1.28 | 2.89E-02 |
| 386 | BAK1      | cg07679836 | 0.19 | 4.07E-09 | ILMN_1805990 | 1.24 | 1.16E-08 |
| 387 | DHDDS     | cg06577005 | 0.17 | 4.81E-09 | ILMN_2405642 | 1.24 | 3.32E-08 |
| 388 | PARP12    | cg07937272 | 0.14 | 5.41E-09 | ILMN_1718558 | 1.56 | 2.77E-12 |
| 389 | TBL2      | cg22511633 | 0.20 | 5.80E-09 | ILMN_1764489 | 1.42 | 1.52E-13 |
| 390 | HLA-G     | cg21529533 | 0.21 | 8.18E-09 | ILMN_1656670 | 1.59 | 1.36E-07 |
| 391 | IGF2BP1   | cg06638433 | 0.22 | 1.06E-08 | ILMN_1733807 | 1.31 | 4.17E-05 |
| 392 | FLNC      | cg02661879 | 0.25 | 1.11E-08 | ILMN_1715748 | 1.39 | 1.02E-03 |
| 393 | BCAR3     | cg18060199 | 0.25 | 1.63E-08 | ILMN_1763638 | 1.30 | 1.43E-05 |
| 394 | PAPSS1    | cg09191232 | 0.15 | 2.17E-08 | ILMN_1781819 | 1.35 | 2.12E-08 |
| 395 | GPX7      | cg22129364 | 0.22 | 2.71E-08 | ILMN_1726030 | 1.40 | 6.13E-07 |
| 396 | SCGN      | cg16954341 | 0.17 | 2.88E-08 | ILMN_1789648 | 1.98 | 5.65E-05 |
| 397 | CD34      | cg19591881 | 0.19 | 3.70E-08 | ILMN_2341229 | 2.22 | 3.02E-19 |
| 398 | PNMA1     | cg23681213 | 0.21 | 4.71E-08 | ILMN_1770850 | 1.28 | 5.81E-05 |
| 399 | HES6      | cg24127874 | 0.20 | 6.85E-08 | ILMN_1694268 | 1.65 | 9.71E-13 |
| 400 | ZNF232    | cg24680602 | 0.21 | 7.31E-08 | ILMN_2139351 | 1.31 | 3.02E-10 |
| 401 | STXBP6    | cg06948294 | 0.14 | 1.21E-07 | ILMN_1750912 | 1.78 | 1.97E-14 |
| 402 | ACPL2     | cg00400028 | 0.18 | 1.26E-07 | ILMN_1706598 | 1.26 | 3.01E-05 |
| 403 | PPP1R2    | cg19280968 | 0.23 | 1.40E-07 | ILMN_1683044 | 1.22 | 9.06E-04 |
| 404 | DDAH2     | cg18055007 | 0.17 | 1.48E-07 | ILMN_1770787 | 1.31 | 4.31E-04 |
| 405 | THBS4     | cg18110483 | 0.16 | 2.23E-07 | ILMN_1736078 | 2.25 | 1.33E-08 |
| 406 | PRR3      | cg21264055 | 0.19 | 2.39E-07 | ILMN_1750167 | 1.21 | 2.30E-09 |
| 407 | MSTO1     | cg15696781 | 0.17 | 2.58E-07 | ILMN_1707337 | 1.22 | 7.68E-08 |
| 408 | DLK1      | cg17412258 | 0.18 | 3.44E-07 | ILMN_1652975 | 1.35 | 4.13E-02 |
| 409 | THY1      | cg12508624 | 0.18 | 4.15E-07 | ILMN_1779875 | 2.24 | 3.81E-15 |
| 410 | BTG3      | cg14380517 | 0.18 | 1.19E-06 | ILMN_1707339 | 1.39 | 3.49E-05 |
| 411 | HIST1H2AC | cg17711541 | 0.11 | 1.39E-06 | ILMN_1792689 | 1.38 | 5.39E-04 |
| 412 | MYO5A     | cg23287547 | 0.14 | 2.11E-06 | ILMN_1698225 | 1.30 | 2.07E-05 |
| 413 | EEF1A2    | cg22463915 | 0.15 | 2.52E-06 | ILMN_2108735 | 2.19 | 1.28E-05 |
| 414 | DNAJB6    | cg11695266 | 0.16 | 3.09E-06 | ILMN_1793770 | 1.49 | 3.34E-09 |
| 415 | NFE2L3    | cg07986525 | 0.20 | 3.13E-06 | ILMN_2049766 | 1.21 | 5.58E-07 |
| 416 | CDCA7     | cg08690031 | 0.18 | 4.30E-06 | ILMN_1737184 | 1.46 | 3.49E-06 |
| 417 | CTSL2     | cg13234643 | 0.19 | 5.33E-06 | ILMN_1748352 | 1.55 | 2.15E-06 |
| 418 | HIST1H2BE | cg21146268 | 0.12 | 7.37E-06 | ILMN_1687947 | 1.31 | 7.76E-07 |
| 419 | TUBB2B    | cg03462055 | 0.15 | 7.68E-06 | ILMN_1680874 | 1.28 | 1.47E-04 |
| 420 | IMPDH1    | cg24127989 | 0.17 | 7.77E-06 | ILMN_1676515 | 1.22 | 2.59E-03 |

|     |            |            |       |          |              |      |          |
|-----|------------|------------|-------|----------|--------------|------|----------|
| 421 | RALBP1     | cg15982419 | 0.15  | 9.46E-06 | ILMN_1791840 | 1.30 | 1.96E-08 |
| 422 | CCNF       | cg06361108 | 0.16  | 1.03E-05 | ILMN_1773119 | 1.37 | 8.54E-14 |
| 423 | TTC4       | cg02255609 | 0.16  | 1.40E-05 | ILMN_1678140 | 1.23 | 1.44E-05 |
| 424 | HLA-A      | cg20879959 | 0.13  | 1.82E-05 | ILMN_1671054 | 1.23 | 7.65E-03 |
| 425 | COMP       | cg09949775 | 0.18  | 2.67E-05 | ILMN_1677636 | 1.37 | 3.15E-04 |
| 426 | UBE2L3     | cg25421647 | 0.14  | 3.20E-05 | ILMN_1677877 | 1.27 | 1.19E-05 |
| 427 | ARID3A     | cg18084554 | 0.11  | 3.56E-05 | ILMN_1670130 | 1.22 | 2.34E-02 |
| 428 | CIQL1      | cg13818573 | 0.17  | 3.61E-05 | ILMN_1716957 | 1.20 | 1.00E-03 |
| 429 | NES        | cg21838334 | 0.14  | 4.12E-05 | ILMN_1738147 | 1.28 | 3.78E-07 |
| 430 | LOX        | cg02548238 | 0.17  | 4.42E-05 | ILMN_1695880 | 1.31 | 1.30E-04 |
| 431 | CHAF1B     | cg13854874 | 0.15  | 5.40E-05 | ILMN_1674231 | 1.47 | 3.53E-08 |
| 432 | MALL       | cg01615704 | 0.15  | 6.24E-05 | ILMN_2063168 | 1.31 | 2.60E-06 |
| 433 | BCAT1      | cg10764357 | 0.12  | 1.03E-04 | ILMN_1766169 | 1.60 | 1.11E-06 |
| 434 | DYNC1H1    | cg10281478 | 0.11  | 1.14E-04 | ILMN_1690397 | 1.25 | 3.17E-03 |
| 435 | TSPAN5     | cg00622677 | 0.11  | 1.27E-04 | ILMN_1799028 | 1.30 | 1.79E-03 |
| 436 | PRKCDBP    | cg18392783 | 0.11  | 1.27E-04 | ILMN_1793476 | 1.23 | 5.34E-06 |
| 437 | CNNM1      | cg01968793 | 0.13  | 1.46E-04 | ILMN_1657750 | 1.25 | 7.08E-05 |
| 438 | BLVRA      | cg17571291 | 0.11  | 1.53E-04 | ILMN_1691436 | 1.48 | 1.12E-04 |
| 439 | TUBB3      | cg15669092 | 0.13  | 1.54E-04 | ILMN_1791726 | 1.20 | 5.58E-04 |
| 440 | MAPK13     | cg24155668 | 0.13  | 1.63E-04 | ILMN_1749327 | 1.32 | 3.05E-03 |
| 441 | NOTCH3     | cg17498321 | 0.13  | 1.85E-04 | ILMN_1658926 | 1.40 | 1.98E-11 |
| 442 | IGF2BP2    | cg18234011 | 0.14  | 3.31E-04 | ILMN_1702447 | 1.61 | 1.61E-05 |
| 443 | GPD1L      | cg05662500 | 0.14  | 3.32E-04 | ILMN_1694106 | 1.32 | 6.09E-04 |
| 444 | AP3M2      | cg07490776 | 0.13  | 3.53E-04 | ILMN_1676946 | 1.46 | 1.87E-14 |
| 445 | CGREF1     | cg22740783 | 0.16  | 3.83E-04 | ILMN_1774722 | 1.51 | 1.26E-10 |
| 446 | PPM1M      | cg20276750 | 0.15  | 3.87E-04 | ILMN_1657810 | 1.20 | 1.26E-03 |
| 447 | HOXD1      | cg19001226 | 0.12  | 3.99E-04 | ILMN_1717381 | 1.36 | 3.35E-05 |
| 448 | ACOT8      | cg08101264 | 0.13  | 4.53E-04 | ILMN_1679600 | 1.25 | 7.31E-08 |
| 449 | FZD6       | cg21975377 | 0.11  | 9.75E-04 | ILMN_1659297 | 1.21 | 6.02E-04 |
| 450 | RBM4       | cg14916213 | 0.12  | 1.09E-03 | ILMN_1712455 | 1.35 | 2.06E-13 |
| 451 | ACTN2      | cg21376883 | 0.10  | 1.28E-03 | ILMN_1654422 | 1.26 | 2.31E-03 |
| 452 | LPL        | cg08918749 | 0.11  | 1.33E-03 | ILMN_1786444 | 1.25 | 5.31E-04 |
| 453 | GLS        | cg15522719 | 0.10  | 1.42E-03 | ILMN_2188722 | 1.26 | 3.13E-05 |
| 454 | RAD54L     | cg03262773 | 0.13  | 1.72E-03 | ILMN_1658027 | 1.58 | 1.22E-13 |
| 455 | MIF        | cg20377673 | 0.12  | 2.00E-03 | ILMN_1807074 | 1.35 | 6.16E-04 |
| 456 | RHEB       | cg03998173 | 0.11  | 2.47E-03 | ILMN_1657949 | 1.67 | 1.92E-13 |
| 457 | HOXA5      | cg02248486 | 0.12  | 3.27E-03 | ILMN_1753613 | 1.23 | 1.88E-03 |
| 458 | PLK1       | cg06240124 | 0.12  | 3.94E-03 | ILMN_1736176 | 1.37 | 1.47E-12 |
| 459 | SLC7A1     | cg14424530 | 0.10  | 6.06E-03 | ILMN_1683859 | 1.22 | 7.33E-03 |
| 460 | CCL20      | cg21643045 | -0.31 | 2.68E-26 | ILMN_1657234 | 3.42 | 2.78E-09 |
| 461 | WDR21C     | cg17703554 | -0.26 | 1.10E-25 | ILMN_1768454 | 1.42 | 7.93E-04 |
| 462 | PI3        | cg02442161 | -0.22 | 4.31E-20 | ILMN_1693192 | 1.26 | 9.94E-06 |
| 463 | TOP1MT     | cg12188860 | -0.32 | 5.76E-20 | ILMN_2405628 | 1.37 | 2.36E-05 |
| 464 | REG1A      | cg05828624 | -0.22 | 6.21E-19 | ILMN_1802441 | 1.29 | 2.48E-02 |
| 465 | CST1       | cg08430598 | -0.30 | 4.43E-18 | ILMN_1753449 | 1.21 | 3.14E-02 |
| 466 | SLC22A18AS | cg08999895 | -0.27 | 2.14E-17 | ILMN_1691048 | 1.44 | 1.17E-05 |
| 467 | DDX49      | cg14757492 | -0.23 | 4.05E-16 | ILMN_1762225 | 1.38 | 4.26E-07 |
| 468 | PDPK1      | cg14444710 | -0.22 | 4.84E-16 | ILMN_1653793 | 1.42 | 1.58E-10 |
| 469 | RBM15B     | cg15821095 | -0.24 | 6.10E-16 | ILMN_1673024 | 1.32 | 7.86E-12 |
| 470 | CDH13      | cg02168291 | -0.22 | 7.71E-15 | ILMN_1766925 | 1.76 | 2.64E-15 |
| 471 | PGCP       | cg01892689 | -0.18 | 3.05E-14 | ILMN_2058795 | 1.60 | 1.68E-08 |
| 472 | ESM1       | cg07233761 | -0.15 | 4.58E-14 | ILMN_2212878 | 2.34 | 4.58E-14 |
| 473 | ATP5J2     | cg03665605 | -0.17 | 7.43E-14 | ILMN_2307883 | 1.45 | 2.19E-11 |
| 474 | ZNF323     | cg20850981 | -0.17 | 1.02E-13 | ILMN_2377991 | 1.44 | 5.02E-07 |
| 475 | RNASE1     | cg13718960 | -0.17 | 4.88E-13 | ILMN_1795183 | 1.23 | 1.07E-02 |
| 476 | ARHGEF18   | cg27377450 | -0.12 | 5.41E-13 | ILMN_1664016 | 1.20 | 1.33E-03 |
| 477 | HSDL1      | cg26359240 | -0.14 | 6.84E-13 | ILMN_2112755 | 1.25 | 1.38E-07 |
| 478 | OLFML2A    | cg18506679 | -0.16 | 1.31E-12 | ILMN_1761425 | 1.33 | 1.24E-05 |
| 479 | AKR1B10    | cg11693019 | -0.17 | 2.08E-12 | ILMN_1672148 | 7.72 | 4.94E-11 |
| 480 | PDZK1      | cg10321723 | -0.18 | 6.58E-12 | ILMN_1708341 | 1.70 | 4.59E-08 |
| 481 | COX4I2     | cg09027725 | -0.15 | 9.32E-12 | ILMN_1815634 | 1.25 | 2.00E-12 |



|     |          |            |       |          |              |       |          |
|-----|----------|------------|-------|----------|--------------|-------|----------|
| 482 | REG3A    | cg27342801 | -0.21 | 1.54E-11 | ILMN_1757504 | 1.24  | 1.82E-02 |
| 483 | ZNF7     | cg20845050 | -0.12 | 1.60E-11 | ILMN_2137066 | 1.57  | 5.57E-13 |
| 484 | JMJD4    | cg11520395 | -0.15 | 1.67E-11 | ILMN_1692896 | 1.25  | 4.93E-09 |
| 485 | SERPINH1 | cg27596068 | -0.12 | 3.50E-11 | ILMN_1751028 | 1.28  | 3.21E-05 |
| 486 | ACTG2    | cg23173910 | -0.16 | 3.85E-11 | ILMN_1795325 | 2.32  | 5.15E-08 |
| 487 | BTBD3    | cg14603345 | -0.20 | 4.21E-11 | ILMN_1713964 | 1.23  | 4.26E-05 |
| 488 | VWF      | cg27347104 | -0.15 | 4.44E-11 | ILMN_1752755 | 2.37  | 1.46E-08 |
| 489 | SLC26A3  | cg22294577 | -0.16 | 5.33E-11 | ILMN_1760087 | 1.35  | 7.71E-03 |
| 490 | DAPK2    | cg23165541 | -0.18 | 8.24E-11 | ILMN_1791847 | 1.30  | 2.88E-08 |
| 491 | RPS2     | cg18279742 | -0.14 | 1.12E-10 | ILMN_2218277 | 1.44  | 2.39E-07 |
| 492 | NDUFA8   | cg01536400 | -0.14 | 1.13E-10 | ILMN_1759729 | 1.20  | 4.57E-05 |
| 493 | UBD      | cg15320474 | -0.17 | 5.78E-10 | ILMN_1678841 | 5.14  | 1.92E-13 |
| 494 | MTMR11   | cg24620905 | -0.11 | 6.69E-10 | ILMN_1769299 | 2.03  | 3.10E-10 |
| 495 | PAQR9    | cg26301689 | -0.19 | 1.90E-09 | ILMN_1798327 | 1.62  | 2.61E-08 |
| 496 | FBLN1    | cg04337944 | -0.17 | 2.92E-09 | ILMN_1700541 | 1.32  | 6.90E-03 |
| 497 | PRND     | cg09906458 | -0.11 | 4.01E-09 | ILMN_1684795 | 1.32  | 1.29E-05 |
| 498 | SPINK1   | cg04577715 | -0.20 | 4.66E-09 | ILMN_1787266 | 11.76 | 3.05E-11 |
| 499 | TNFRSF4  | cg22335801 | -0.20 | 1.19E-08 | ILMN_2112256 | 1.31  | 5.26E-11 |
| 500 | PTGFRN   | cg03752628 | -0.12 | 1.21E-08 | ILMN_1743130 | 1.32  | 8.30E-08 |
| 501 | GPNMB    | cg17274742 | -0.14 | 1.26E-08 | ILMN_1801205 | 1.57  | 2.40E-03 |
| 502 | FGF21    | cg17264470 | -0.18 | 3.15E-08 | ILMN_1772789 | 1.28  | 3.10E-02 |
| 503 | CLDN15   | cg02512860 | -0.21 | 3.73E-08 | ILMN_1682226 | 1.93  | 3.17E-10 |
| 504 | AHCTF1   | cg27050763 | -0.21 | 4.27E-08 | ILMN_1809139 | 1.20  | 2.20E-04 |
| 505 | GPX1     | cg06613840 | -0.12 | 7.34E-08 | ILMN_1749662 | 1.31  | 3.27E-03 |
| 506 | ISG20L2  | cg00392257 | -0.16 | 1.37E-07 | ILMN_2090397 | 1.21  | 2.16E-05 |
| 507 | PLOD3    | cg25527547 | -0.13 | 1.91E-07 | ILMN_1774836 | 1.86  | 3.25E-17 |
| 508 | CEACAM1  | cg20657383 | -0.12 | 2.64E-07 | ILMN_1664330 | 1.38  | 4.53E-05 |
| 509 | MYH4     | cg23400451 | -0.11 | 2.79E-07 | ILMN_1729251 | 1.21  | 2.25E-02 |
| 510 | ATP6V1E2 | cg27485921 | -0.11 | 2.89E-07 | ILMN_1810235 | 1.41  | 4.97E-11 |
| 511 | PGC      | cg17391877 | -0.12 | 3.98E-07 | ILMN_1795484 | 1.57  | 7.95E-03 |
| 512 | DEGS1    | cg23213217 | -0.17 | 4.29E-07 | ILMN_1780058 | 1.27  | 1.07E-03 |
| 513 | TPM3     | cg24490338 | -0.13 | 4.48E-07 | ILMN_1697567 | 1.61  | 2.77E-14 |
| 514 | SLC2A5   | cg24480859 | -0.13 | 4.73E-07 | ILMN_1671337 | 2.07  | 6.56E-08 |
| 515 | NCSTN    | cg00689010 | -0.13 | 5.87E-07 | ILMN_1735180 | 1.48  | 1.78E-08 |
| 516 | TMC5     | cg25690265 | -0.12 | 1.07E-06 | ILMN_1730117 | 1.23  | 1.76E-02 |
| 517 | COL15A1  | cg20503329 | -0.14 | 1.25E-06 | ILMN_1768940 | 2.22  | 9.12E-15 |
| 518 | SFN      | cg03421300 | -0.11 | 1.54E-06 | ILMN_1806607 | 1.30  | 5.99E-05 |
| 519 | ZNF572   | cg23968383 | -0.18 | 1.55E-06 | ILMN_1802974 | 1.27  | 2.22E-08 |
| 520 | RAB4A    | cg06646021 | -0.12 | 2.05E-06 | ILMN_1677824 | 1.34  | 3.77E-07 |
| 521 | GCNT3    | cg23877385 | -0.12 | 3.82E-06 | ILMN_1712082 | 1.69  | 2.34E-05 |
| 522 | RASGRP3  | cg01109219 | -0.11 | 3.98E-06 | ILMN_1727045 | 1.25  | 9.53E-05 |
| 523 | AQP10    | cg20713492 | -0.12 | 4.00E-06 | ILMN_2090004 | 1.25  | 5.74E-03 |
| 524 | SRI      | cg02399455 | -0.12 | 4.82E-06 | ILMN_1682054 | 1.22  | 9.48E-07 |
| 525 | SLC22A11 | cg09326702 | -0.12 | 9.52E-06 | ILMN_1735386 | 1.55  | 6.51E-05 |
| 526 | CYP17A1  | cg09201719 | -0.11 | 1.45E-05 | ILMN_1760554 | 1.49  | 3.04E-04 |
| 527 | AQP8     | cg07327347 | -0.12 | 2.69E-05 | ILMN_1713462 | 1.22  | 4.57E-03 |
| 528 | CARD10   | cg13797282 | -0.13 | 3.09E-05 | ILMN_1743714 | 1.21  | 1.74E-03 |
| 529 | NUP50    | cg07986773 | -0.15 | 3.22E-05 | ILMN_1725612 | 1.22  | 7.72E-05 |
| 530 | LGALS4   | cg06394229 | -0.12 | 6.40E-05 | ILMN_1694034 | 1.69  | 6.92E-03 |
| 531 | MMP9     | cg20925811 | -0.11 | 7.53E-05 | ILMN_1796316 | 2.04  | 1.01E-04 |
| 532 | S100A10  | cg10795646 | -0.10 | 1.04E-04 | ILMN_2046730 | 2.07  | 1.88E-13 |
| 533 | CMTM8    | cg01617750 | -0.11 | 2.66E-04 | ILMN_1710124 | 1.22  | 4.94E-03 |
| 534 | PLCE1    | cg09480837 | -0.13 | 2.90E-04 | ILMN_1784447 | 1.38  | 5.05E-06 |
| 535 | CAD      | cg09947274 | -0.10 | 3.06E-04 | ILMN_1810992 | 1.28  | 3.19E-10 |
| 536 | VHL      | cg16869108 | -0.13 | 9.87E-04 | ILMN_1801984 | 1.30  | 4.35E-10 |
