# Supplementary material for: Methylation Profiles Reveal Distinct Subgroup of Hepatocellular Carcinoma Patients with Poor Prognosis
Source: PubMed Central journal article supplement (PMC4122406; doi:10.1371/journal.pone.0104158), 2014-08-05
Supplement: pone.0104158.s014.pdf [file pone.0104158.s014.pdf]

Table S9. Potential upstream regulators predicted by Ingenuity® knowledge base. Z-score was computed based on the direction change of gene expression in input dataset. Overlap p-value tests the probability of having the targets of upstream regulator in our input dataset by chance.

| Upstream Regulator | Regulator Type                    | Activation z-score | p-value of overlap | No. of potentially regulated molecules | Predicted Mechanistic Network                                      |
|--------------------|-----------------------------------|--------------------|--------------------|----------------------------------------|--------------------------------------------------------------------|
| CEBPB              | transcription regulator           | -1.70              | 3.37E-08           | 13                                     |                                                                    |
| SP1                | transcription regulator           |                    | 6.96E-07           | 21                                     | CEBPB,SP1                                                          |
| STAT3              | transcription regulator           | 0.49               | 1.09E-06           | 14                                     | NFKB1,NFkB (complex),RELA,STAT3,TNF                                |
| NFkB (complex)     | complex                           | -1.94              | 2.78E-06           | 19                                     | CEBPB,IL1B,NFKB1,NFkB (complex),RELA,STAT3,TNF                     |
| KIAA1524           | other                             | -0.63              | 5.50E-06           | 10                                     |                                                                    |
| MGEA5              | enzyme                            |                    | 5.52E-06           | 20                                     |                                                                    |
| P38 MAPK           | group                             | 0.01               | 1.04E-05           | 13                                     | CEBPB,ERK1/2,IL1B,NFKB1,NFkB (complex),P38 MAPK,RELA,SP1,STAT3,TNF |
| SP3                | transcription regulator           |                    | 1.71E-05           | 11                                     | HDAC1,NFKB1,SP3                                                    |
| CEBPA              | transcription regulator           | -2.72              | 2.28E-05           | 13                                     |                                                                    |
| ESR1               | ligand-dependent nuclear receptor | -1.34              | 2.63E-05           | 17                                     | ERK1/2,ESR1,HDAC1,NFKB1,NFkB (complex),RELA,SP1,SP3,STAT3          |
| APP                | other                             | 0.56               | 6.02E-05           | 5                                      |                                                                    |
| TNF                | cytokine                          | -1.74              | 7.63E-05           | 27                                     | CEBPB,ERK1/2,IL1B,Jnk,NFKB1,NFkB (complex),RELA,SP1,STAT3,TNF      |
| CAMP               | other                             | -0.37              | 1.11E-04           | 6                                      | CAMP,CEBPB,IL18,IL1B,NFKB1,NFkB (complex),RELA,STAT3,TNF           |
| HDAC1              | transcription regulator           |                    | 1.48E-04           | 8                                      | HDAC1,NFKB1,NFkB (complex),RELA,SP3                                |
| IL1B               | cytokine                          | 0.08               | 1.71E-04           | 15                                     | CEBPB,IL18,IL1B,NFKB1,NFkB (complex),RELA                          |
| Hsp27              | group                             | -0.15              | 1.95E-04           | 5                                      |                                                                    |
| POU2F1             | transcription regulator           |                    | 1.95E-04           | 5                                      |                                                                    |
| HNF1A              | transcription regulator           |                    | 2.45E-04           | 11                                     |                                                                    |
| Gm-csf             | group                             | -1.11              | 2.89E-04           | 6                                      | CEBPB,Gm-csf,IL1B,NFKB1,NFkB (complex),RELA,STAT3                  |
| Lh                 | complex                           | -0.69              | 2.99E-04           | 16                                     |                                                                    |
| IFNG               | cytokine                          | -0.60              | 3.16E-04           | 20                                     | CEBPB,IFNG,IL10,IL1B,NFKB1,NFkB (complex),RELA,STAT3               |
| PPARA              | ligand-dependent nuclear receptor |                    | 3.43E-04           | 6                                      |                                                                    |
| IL5                | cytokine                          | -1.89              | 3.78E-04           | 7                                      |                                                                    |
| COL18A1            | other                             | 0.71               | 5.32E-04           | 8                                      |                                                                    |
| IL13               | cytokine                          | 0.29               | 5.94E-04           | 14                                     |                                                                    |
